# Supplementary material for: Druggable proteins influencing cardiac structure and function: Implications for heart failure therapies and cancer cardiotoxicity
Source: PubMed Central journal article supplement (PMC10132758; doi:10.1126/sciadv.add4984), 2023-04-26
Supplement: sciadv.add4984_sm.pdf [file sciadv.add4984_sm.pdf]

Supplementary Materials for  
**Druggable proteins influencing cardiac structure and function: Implications  
for heart failure therapies and cancer cardiotoxicity**

Amand F. Schmidt *et al.*

Corresponding author: Amand F. Schmidt, [amand.schmidt@ucl.ac.uk](mailto:amand.schmidt@ucl.ac.uk)

*Sci. Adv.* **9**, eadd4984 (2023)  
DOI: 10.1126/sciadv.add4984

**The PDF file includes:**

Figs. S1 to S16  
Tables S1 to S19  
Supplementary Methods  
Supplementary Results  
Locus-view plots  
Gene assignment table  
Supplementary Note

**Other Supplementary Material for this manuscript includes the following:**

Supplementary file 3

# Figures

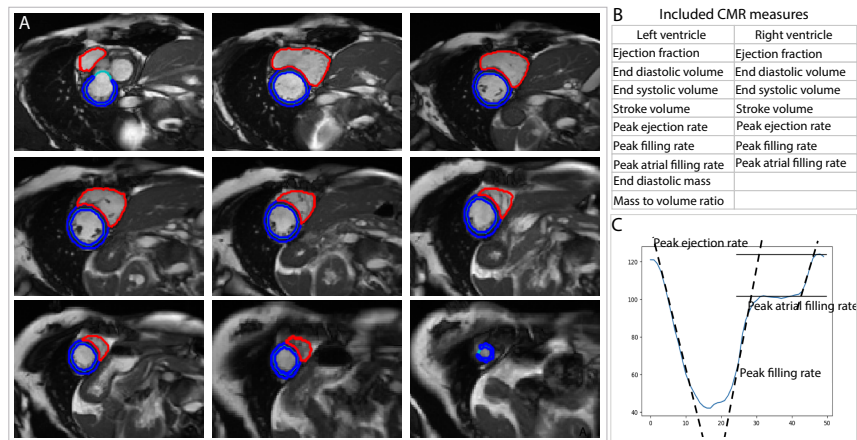

**Figure S1: A)** Examples of automatic segmentation of the left (blue) and right (red) ventricle from basal to apical short axis cine CMR (base to apex). **B)** The included left and right ventricular CMR measures calculated using a deep-learning algorithm. **C)** A graphical explanation of the calculation of the peak ejection rate, peak filling rate and peak atrial filling rate.

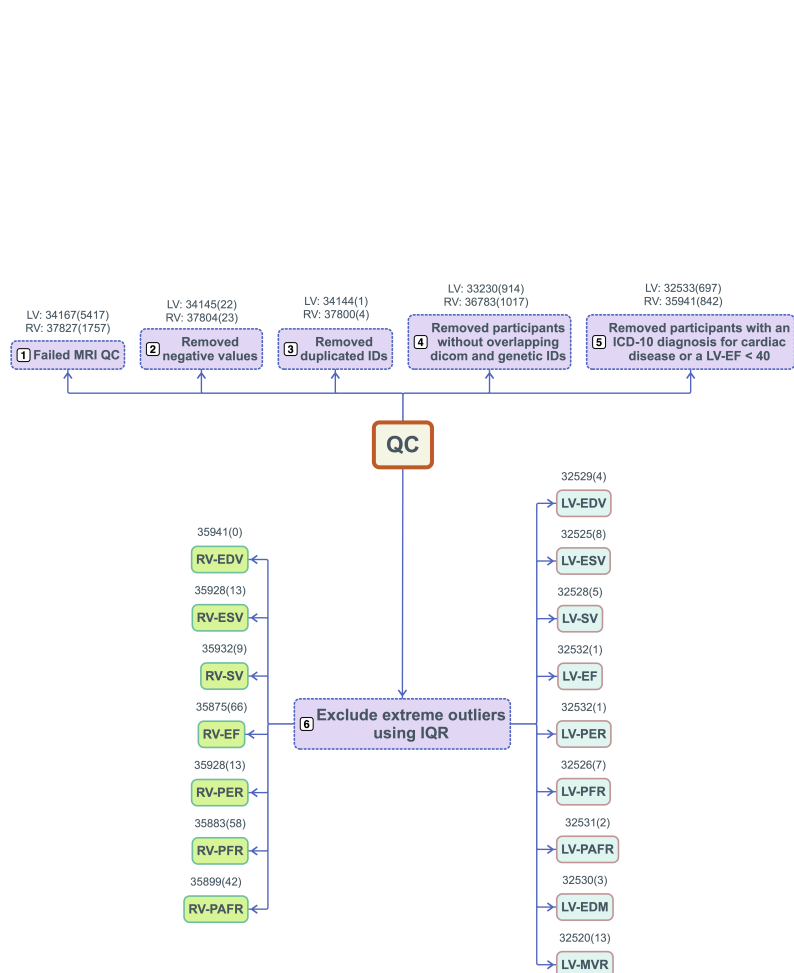

**Figure S2:** A flowchart of the various quality control steps applied to the available CMR data; see the supplementary methods section for further details.

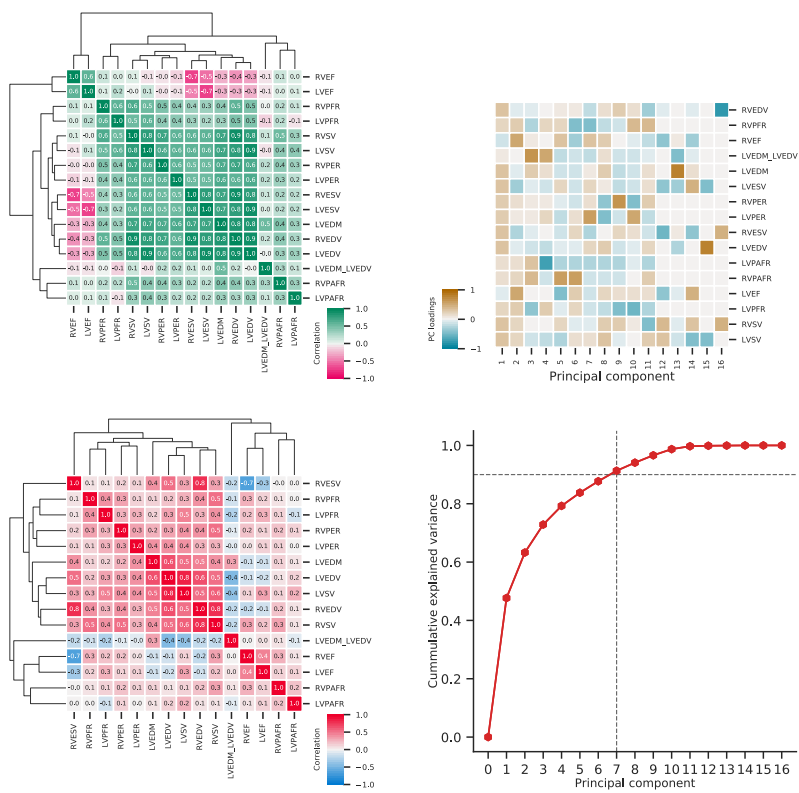

**Figure S3:** Left column Spearman’s pairwise correlation: *top left*, between the phenotypic cardiac MRI measurements (based on a  $n=36548$  UKB sample), and *bottom left*, between the genetic association with these cardiac MRIs. Right column principal components analysis (PCA): *bottom right*, the component loadings, and *top right*, the cumulative explained variance by principal component. The heatmap margins were ordered by hierarchical clustering of the Euclidean distance.

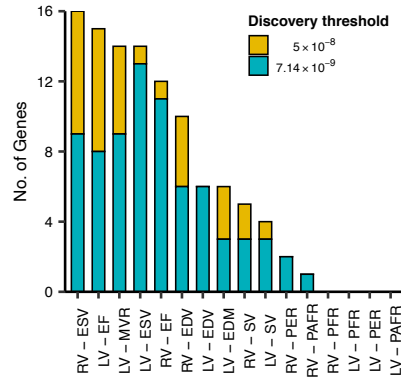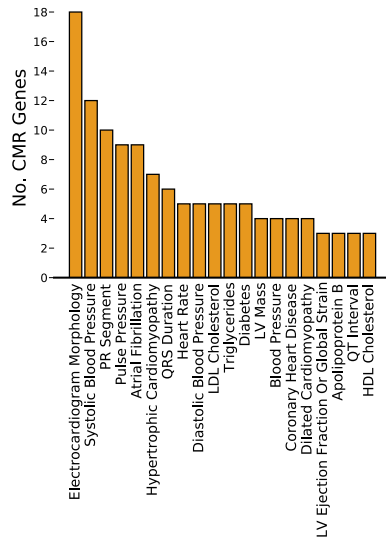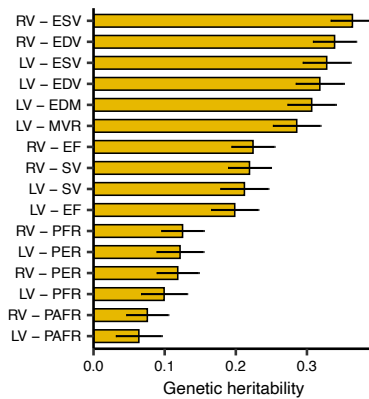

**Figure S4:** Aggregated GWAS results and genetic heritability estimates. Top panel depicts the number of significant putative causal genes per CMR trait and significance threshold. The middle panel provides the top 20 most frequent trait associations of the discovered CMR genes, sourced from GWAS catalog. The bottom panel provides the genetic heritability estimates with 95% confidence intervals. Results are based on an analysis of 36,548 subjects, a star indicates significant p-value at an alpha of 0.05.

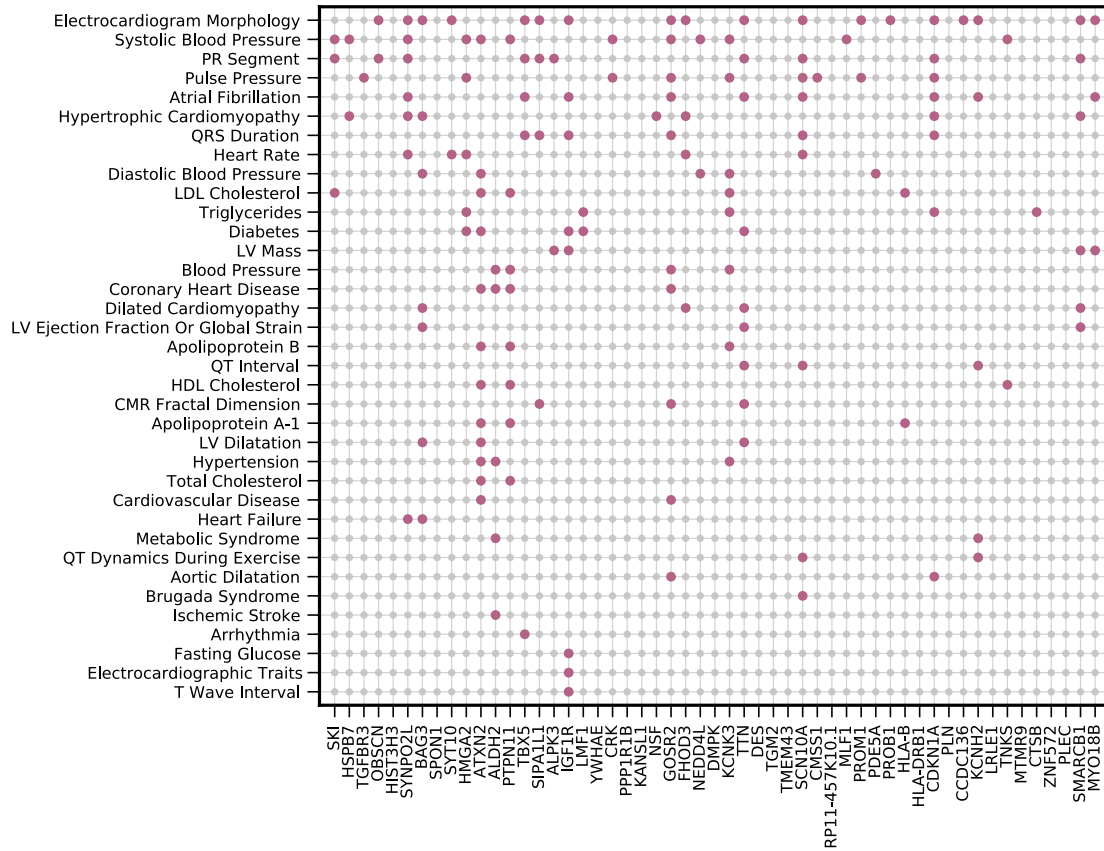

**Figure S5:** An incidence matrix linking the CMR loci to previous cardio-metabolic GWAS associations from GWAS catalog.

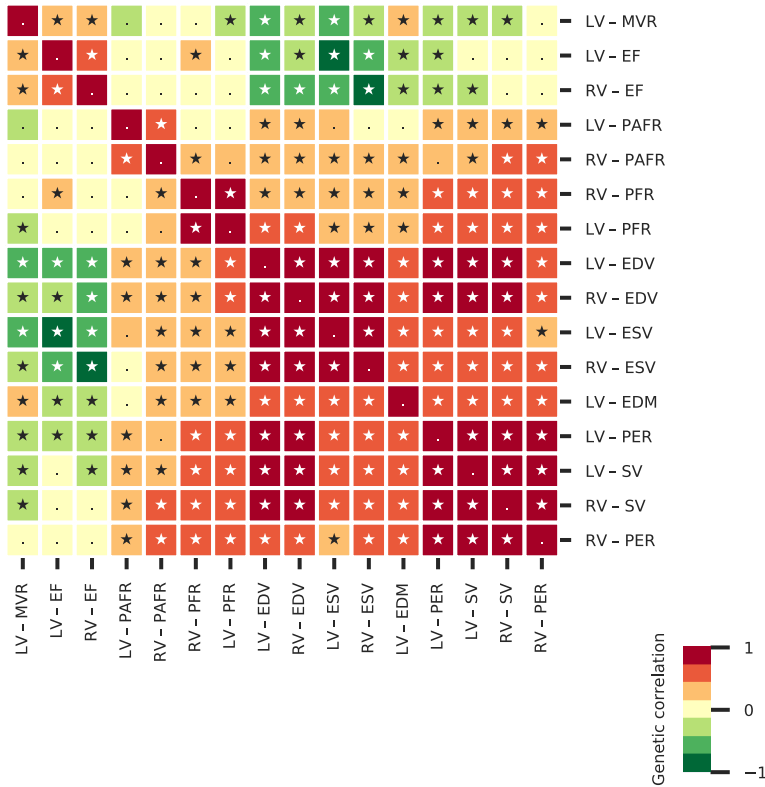

**Figure S6:** The pairwise genetic correlation between CMR traits. LV, left-ventricle; RV, right-ventricle; EDV, end-diastolic volume; ESV, end-systolic volume; SV, stroke volume; EF, ejection fraction; PER, peak ejection rate; PAFR/PFR, peak (atrial) filling rate; EDM, end-diastolic mass; MVR, ratio between end diastolic mass and volume. Results are based on an analysis of 36,548 subjects. Star-annotated cells indicate significant associations at an alpha of 0.05.

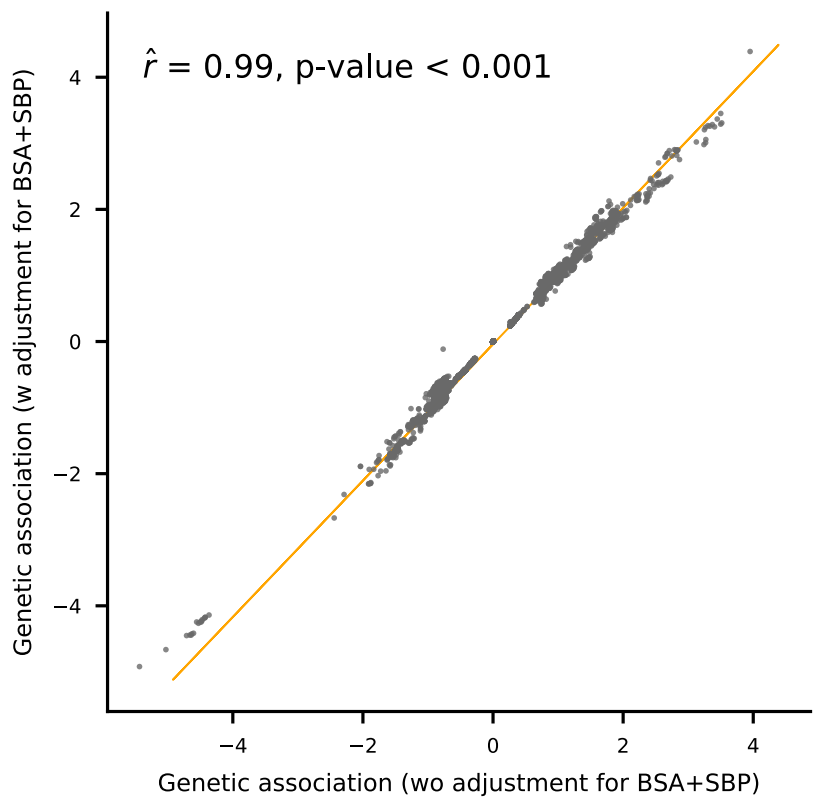

**Figure S7:** The correlation between genetic associations (mean difference) with and without adjustment for body surface area (BSA) and systolic blood pressure (SBP).  $\hat{r}$  represents the Pearson correlation coefficient.



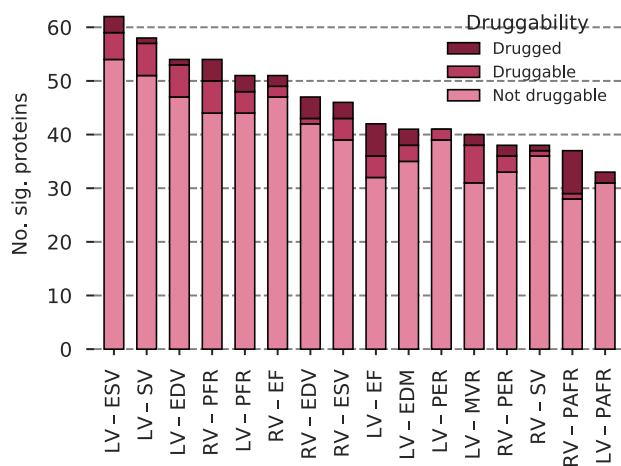

**Figure S8:** The frequency of plasma protein associations per CMR trait stratified on druggability status. Results are based on *cis* Mendelian randomization analyses and represent estimates that passed a multiplicity corrected p-value threshold of  $7.81 \times 10^{-6}$ . Druggability was based on an update version of Finan *et al* [8]

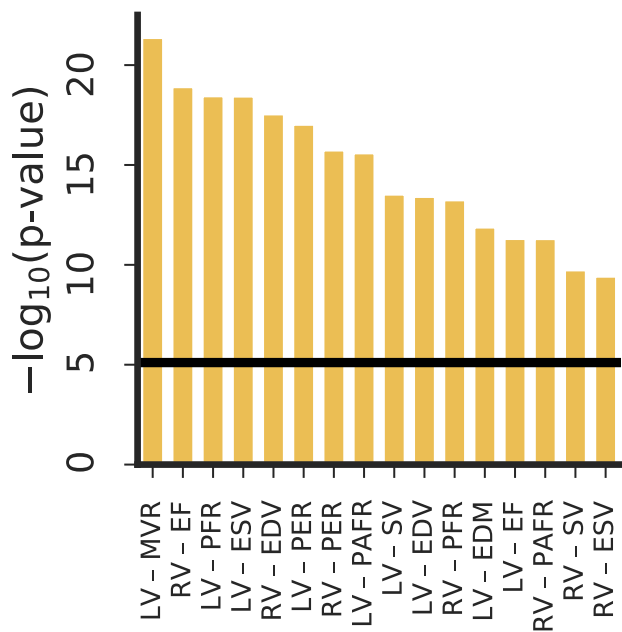

**Figure S9:** Trait specific Kolmogorov-Smirnoff null-hypothesis tests comparing the empirical p-value distribution to the uniform distribution expected when results are driven by false positive results. The horizontal line indicates the multiplicity corrected alpha of  $7.81 \times 10^{-6}$ .

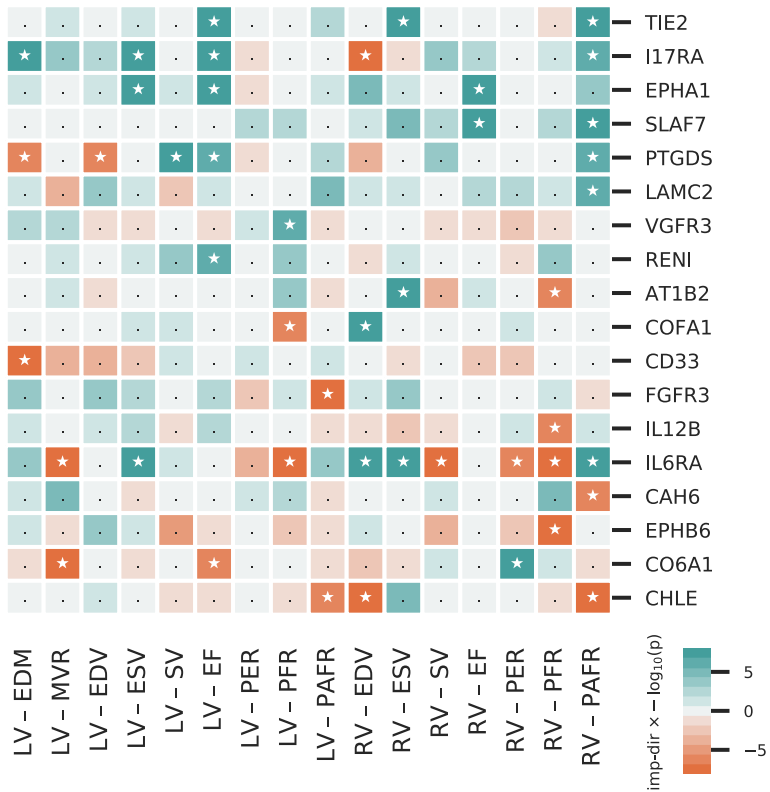

**Figure S10:** Drug target MR of *drugged* plasma protein concentration (per SD) effects on CMR traits orientated toward the cardiac function improving direction ('imp-dir'). Cells are coloured by truncated p-value (max 8) multiplied by effect direction.

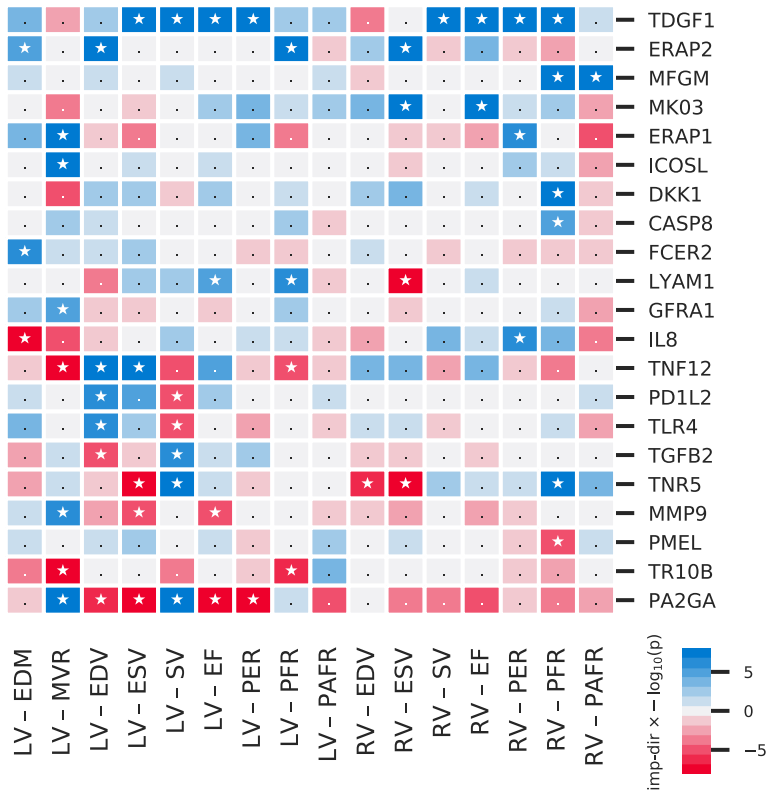

**Figure S11:** Drug target MR of *druggable* plasma protein concentration (per SD) effects on CMR traits orientated toward the cardiac function improving direction ('imp-dir'). Cells are coloured by truncated p-value (max 8) multiplied by effect direction.

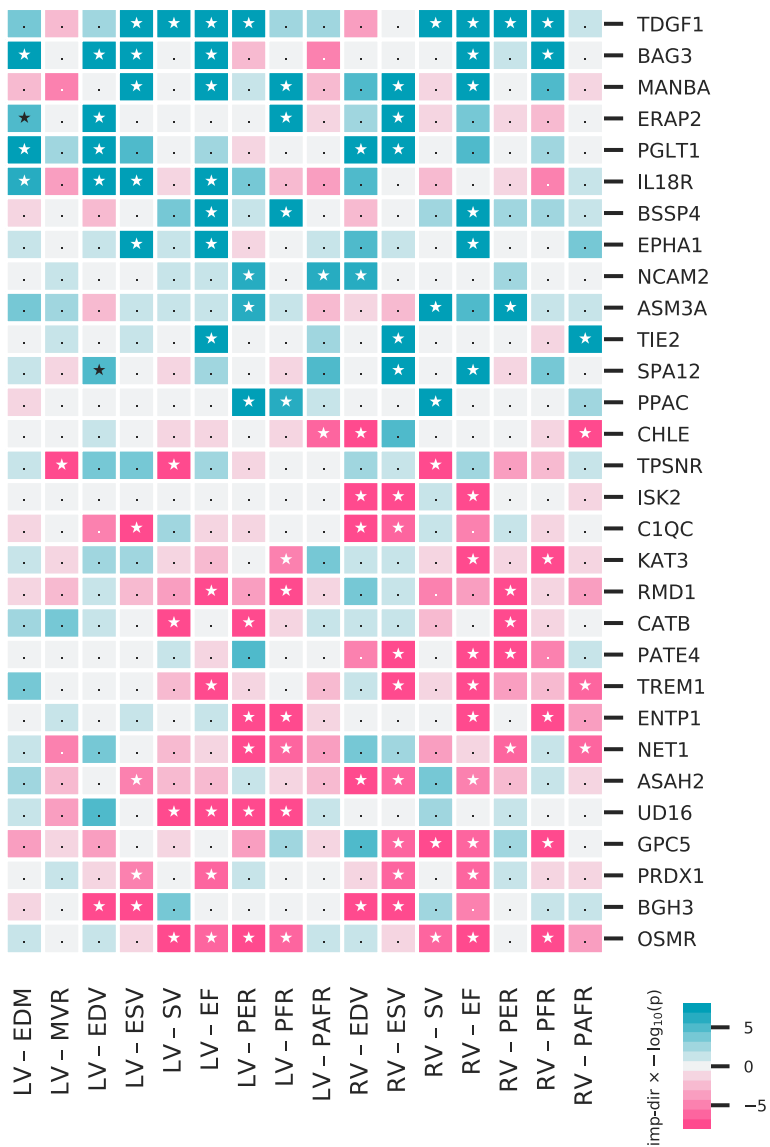

**Figure S12:** Concordant protein effects on CMR traits orientated toward the cardiac function improving direction ('imp-dir'). Depicting proteins affecting three or more CMR traits, in a concordant risk increasing or decreasing direction. Cells are coloured by truncated p-value (max 8) multiplied by effect direction.

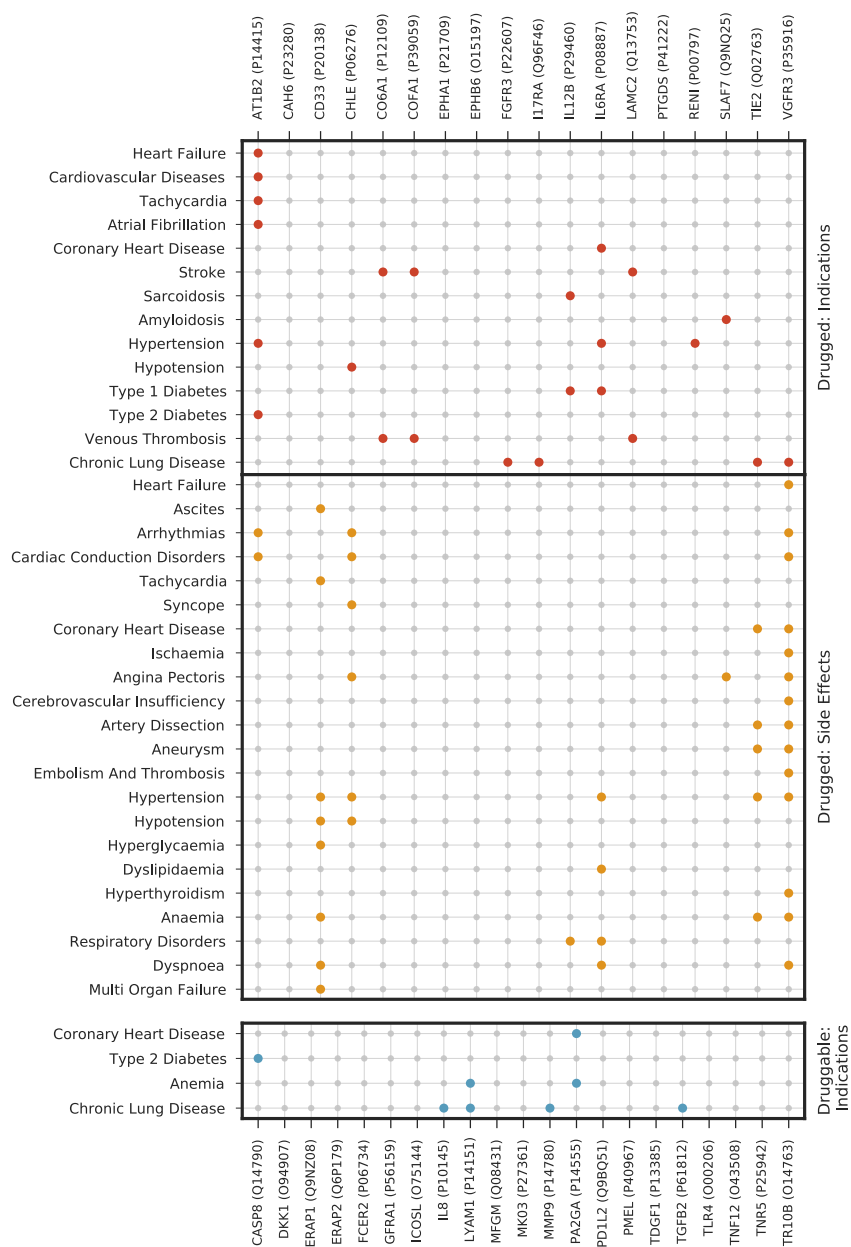

**Figure S13:** Incidence matrix of cardio-metabolic related indications and side effects of compounds targeting druggable and drug-gable proteins associated with CMR traits. Coloured dots represents an established link between the compound and trait; data were extracted from BNF and ChEMBL. Nomenclature: proteins are referred to by their uniprot entry name to differentiate them from the encoding genes. Protein names and uniprot ids are provided on the top and bottom x-axis, with indication or side effect trait on the y-axis

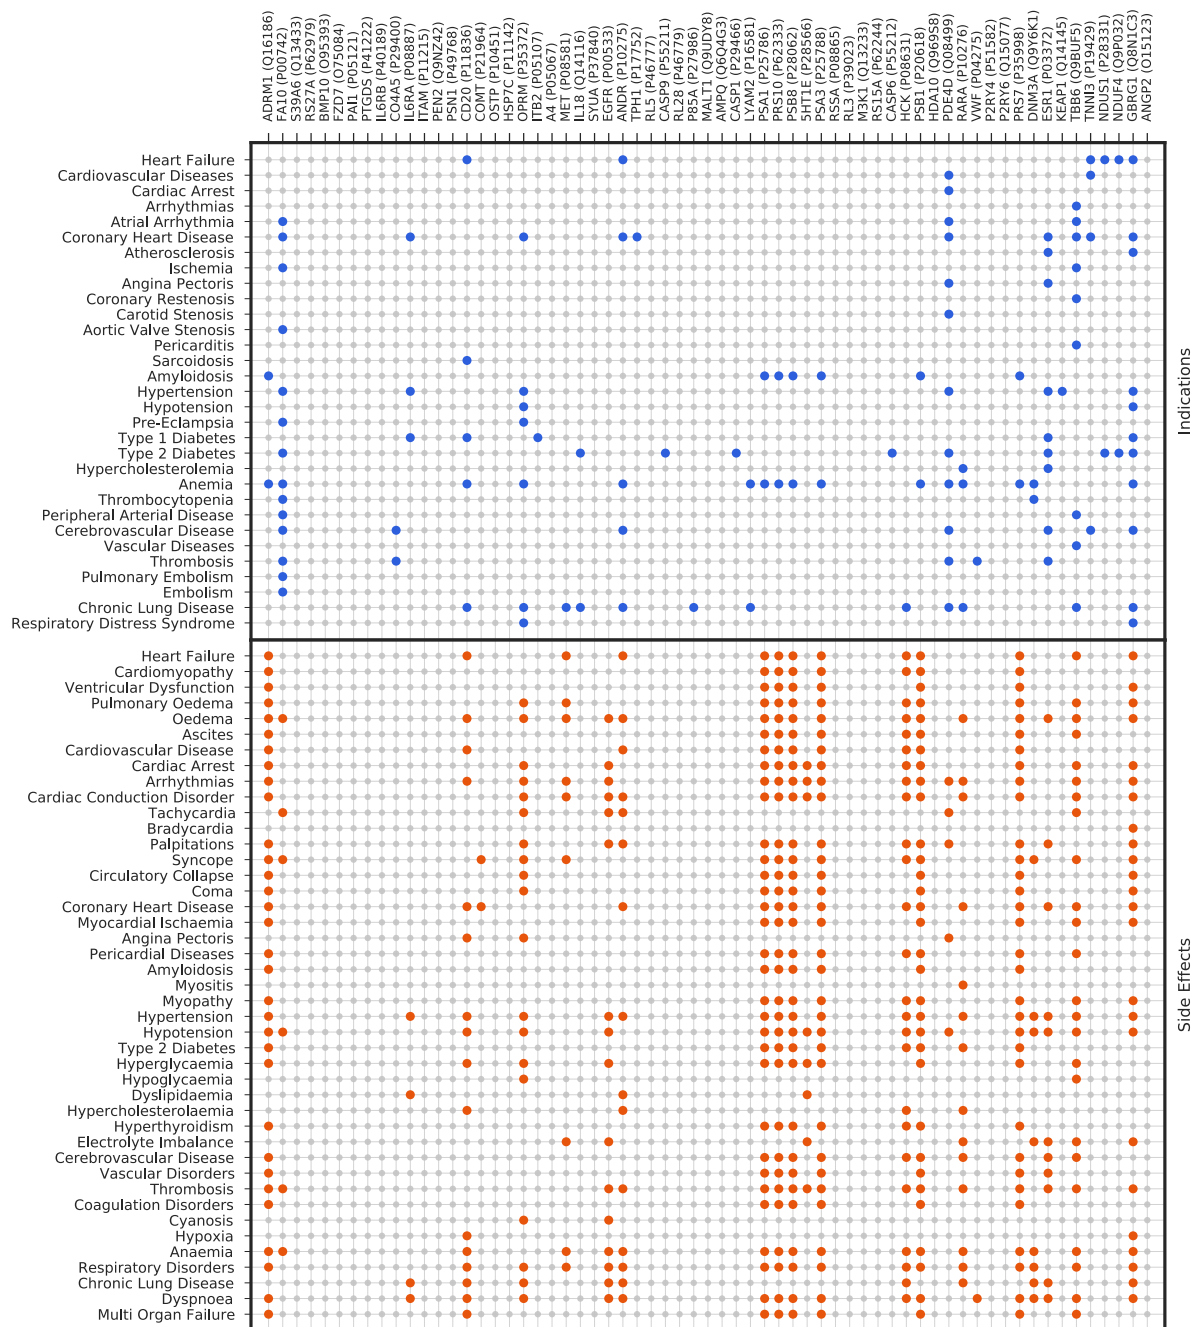

**Figure S14:** Incidence matrix of cardiovascular related indication and side effect of *indirectly* drugged or druggable protein. These *indirectly* drugged or druggable proteins were identified through a Reactome pathway analysis, identifying druggable proteins that had an protein-protein interaction with a *concordant* CMR associated indexing protein. Coloured dots represents an established link between the compound and trait. Nomenclature: proteins are referred to by their uniprot entry name to differentiate them from the encoding genes. Protein name and uniprot id are provided on the top x-axis, with indication or side effect trait on the y-axis.

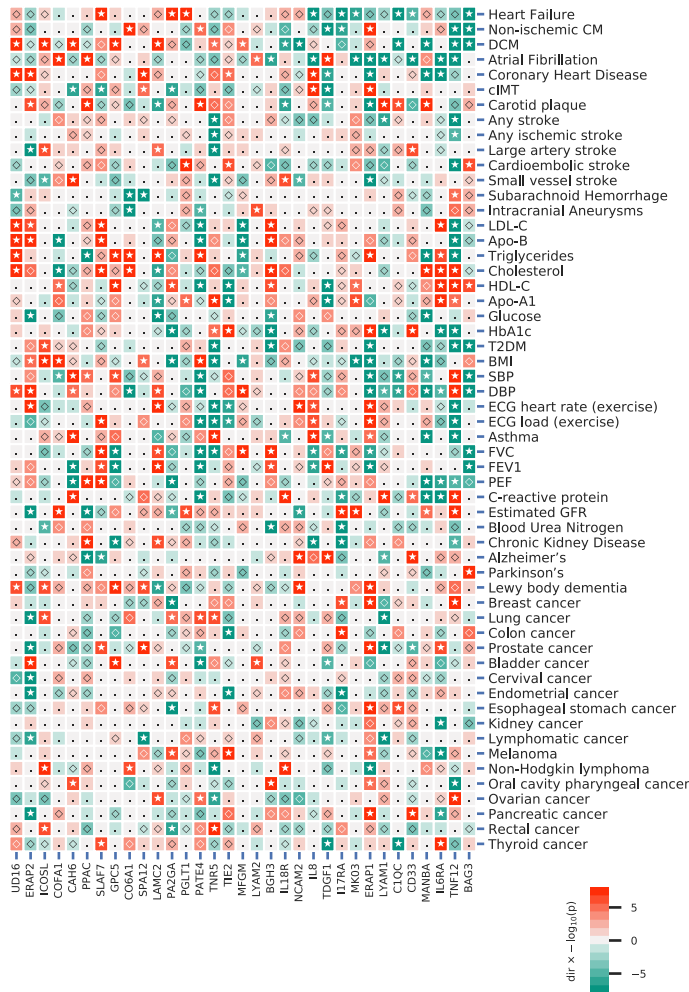

**Figure S15:** A phenome-wide scan of CMR proteins associated with one or more cardiac outcome. N.b. Proteins were curated on having a multiplicity corrected p-value  $> 1.29 \times 10^{-5}$  with one or more of the following cardiac traits: Heart Failure (HR), Dilated Cardiomyopathy (DCM), Non-ischemic CM, Atrial Fibrillation (AF), or Coronary Heart Disease (CHD). P-value passing the 0.05 threshold are indicated by square rotated about 90 degrees, with stars indicating results passing the mentioned multiplicity corrected threshold. Cells were coloured by effect direction times  $-\log_{10}(\text{p-value})$ ; where p-values were truncated to 8.



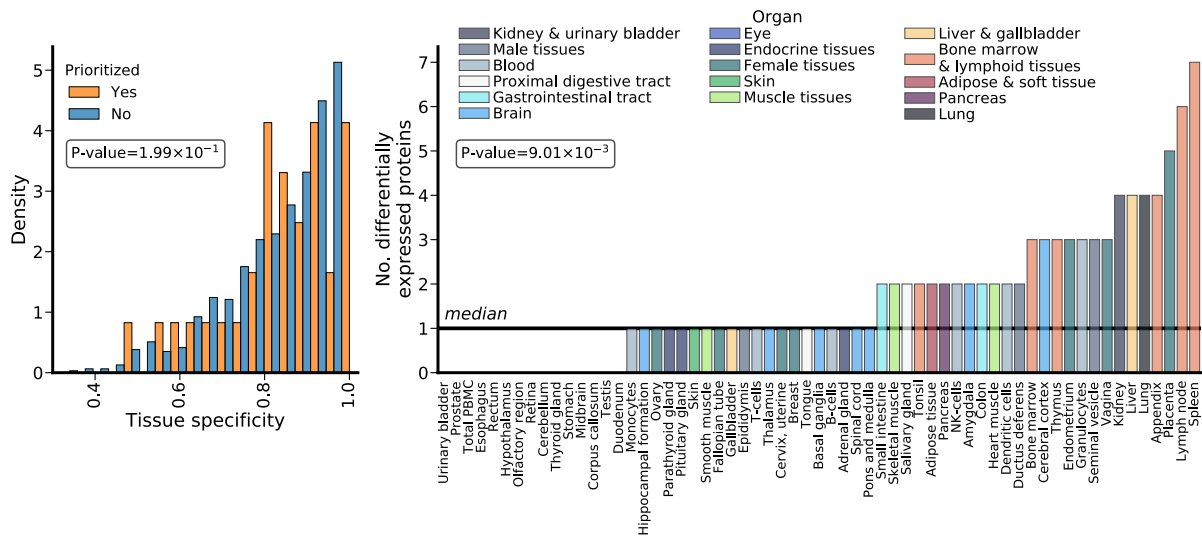

**Figure S16:** *Left:* The tissue specificity of plasma proteins prioritized on having an robust CMR and cardiac outcome association; The p-value is based on a Mann-Whitney test. *Right:* The number of tissues with differentially more mRNA expression of the CMR and cardiac outcome prioritized plasma proteins; with  $\chi^2$ -test for equal number differentially expressed proteins per tissue. Data were sourced from the Human Protein Atlas.

## Tables

| Measurement              | Abbreviation | Unit    | Pathological consequence of higher values |
|--------------------------|--------------|---------|-------------------------------------------|
| Stroke volume            | SV           | ml      | Beneficial                                |
| Peak ejection rate       | PER          | ml/s    | Beneficial                                |
| Peak atrial filling rate | PAFR         | ml/s    | Beneficial                                |
| Peak filling rate        | PFR          | ml/s    | Beneficial                                |
| End systolic volume      | ESV          | ml      | Harmful                                   |
| Ejection fraction        | EF           | %       | Beneficial                                |
| End diastolic volume     | EDV          | ml      | Harmful                                   |
| End diastolic mass       | EDM          | gram    | Harmful                                   |
| Ratio of EDM and EDV     | MVR          | gram/ml | Harmful                                   |

**Table S1:** CMR measurements and pathological consequence

**Table S2:** UK biobank fields used to exclude participants with possible pre-existing cardiac disease.

| Excluded phenotype                                         | UKB field ID/ICD-10 code |
|------------------------------------------------------------|--------------------------|
| Myocardial infarction                                      | 42000                    |
| Acute transmural myocardial infarction of anterior wall    | I21.0                    |
| Acute transmural myocardial infarction of inferior wall    | I21.1                    |
| Acute transmural myocardial infarction of other sites      | I21.2                    |
| Acute transmural myocardial infarction of unspecified site | I21.3                    |
| Acute subendocardial myocardial infarction                 | I21.4                    |
| Acute myocardial infarction                                | I21.9                    |
| Subsequent myocardial infarction of anterior wall          | I22.0                    |
| Subsequent myocardial infarction of inferior wall          | I22.1                    |
| Subsequent myocardial infarction of other sites            | I22.8                    |
| Subsequent myocardial infarction of unspecified site       | I22.9                    |
| Acute ischaemic heart disease                              | I24.9                    |
| Old myocardial infarction                                  | I25.2                    |
| Pulmonary embolism with mention of acute cor pulmonale     | I26.0                    |
| Primary pulmonary hypertension                             | I27.0                    |
| Kyphoscoliotic heart disease                               | I27.1                    |
| Other secondary pulmonary hypertension                     | I27.2                    |
| Nonrheumatic tricuspid (valve) stenosis                    | I36.0                    |
| Nonrheumatic tricuspid (valve) insufficiency               | I36.1                    |
| Other nonrheumatic tricuspid valve disorders               | I36.8                    |
| Nonrheumatic tricuspid valve disorder                      | I36.9                    |
| Pulmonary valve stenosis                                   | I37.0                    |
| Pulmonary valve insufficiency                              | I37.1                    |
| Pulmonary valve stenosis with insufficiency                | I37.2                    |
| Other pulmonary valve disorders                            | I37.8                    |
| Pulmonary valve disorder                                   | I37.9                    |
| Congestive heart failure                                   | I50.0                    |
| Left ventricular failure                                   | I50.1                    |
| Heart failure                                              | I50.9                    |
| Hypertensive heart disease with (congestive) heart failure | I11.0                    |
| Dilated cardiomyopathy                                     | I42.0                    |
| Obstructive hypertrophic cardiomyopathy                    | I42.1                    |
| Other hypertrophic cardiomyopathy                          | I42.2                    |
| Endocardial fibroelastosis                                 | I42.4                    |
| Other restrictive cardiomyopathy                           | I42.5                    |
| Alcoholic cardiomyopathy                                   | I42.6                    |
| Cardiomyopathy due to drugs and other external agents      | I42.7                    |
| Other cardiomyopathies                                     | I42.8                    |
| Congenital malformation of cardiac chambers and connexions | Q20.9                    |
| Common arterial trunk                                      | Q20.0                    |
| Discordant ventriculoarterial connexion                    | Q20.3                    |
| Ventricular septal defect                                  | Q21.0                    |
| Atrial septal defect                                       | Q21.1                    |
| Atrioventricular septal defect                             | Q21.2                    |
| Tetralogy of Fallot                                        | Q21.3                    |
| Aortopulmonary septal defect                               | Q21.4                    |
| Other congenital malformations of cardiac septa            | Q21.8                    |
| Congenital malformation of cardiac septum                  | Q21.9                    |
| Congenital pulmonary valve stenosis                        | Q22.1                    |
| Congenital pulmonary valve insufficiency                   | Q22.2                    |
| 'Ebstein's anomaly'                                        | Q22.5                    |
| Other congenital malformations of tricuspid valve          | Q22.8                    |
| Congenital stenosis of aortic valve                        | Q23.0                    |
| Congenital insufficiency of aortic valve                   | Q23.1                    |
| Congenital mitral insufficiency                            | Q23.3                    |
| Other congenital malformations of aortic and mitral valves | Q23.8                    |
| Congenital malformation of aortic and mitral valves        | Q23.9                    |

**Table S2:** UK biobank fields used to exclude participants with possible pre-existing cardiac disease. *(continued)*

| <b>Excluded phenotype</b>                                                    | <b>UKB field ID/ICD-10 code</b> |
|------------------------------------------------------------------------------|---------------------------------|
| Chronic obstructive pulmonary disease with acute lower respiratory infection | J44.0                           |
| Chronic obstructive pulmonary disease with acute exacerbation                | J44.1                           |
| Other specified chronic obstructive pulmonary disease                        | J44.8                           |
| 'MacLeod's syndrome'                                                         | J43.0                           |
| Panlobular emphysema                                                         | J43.1                           |
| Centrilobular emphysema                                                      | J43.2                           |
| Other emphysema                                                              | J43.8                           |
| Emphysema                                                                    | J43.9                           |
| LVEF <40%                                                                    | Automated CMR data used         |

**Table S3:** Characteristics of UK biobank subjects used in the CMR GWAS.

| Characteristics                    | Total (n=36548) | Female (n=18879) | Male (n=17093) | Missing |
|------------------------------------|-----------------|------------------|----------------|---------|
| Age at time of CMR (years)         | 63.9 (7.6)      | 63.3 (7.4)       | 64.5 (7.7)     | 0       |
| <i>Ethnicity</i>                   |                 |                  |                | 679     |
| Caucasian                          | 34872 (97.0%)   | 18336 (97.1%)    | 16536 (96.8%)  |         |
| Black                              | 209 (0.6%)      | 111 (0.6%)       | 98 (0.6%)      |         |
| Asian                              | 351 (1.0%)      | 122 (0.6%)       | 229 (1.3%)     |         |
| Other                              | 437 (1.3%)      | 267 (1.5%)       | 170 (1.0%)     |         |
| Height (cm)                        | 169.2 (89.2)    | 162.8 (6.2)      | 176.1 (6.6)    | 0       |
| Weight (kg)                        | 76.0 (15.1)     | 69.1 (13.1)      | 83.7 (13.3)    | 0       |
| <b>Cardiovascular risk factors</b> |                 |                  |                |         |
| BMI (kg/m <sup>2</sup> )           | 26.5 (4.4)      | 26.1 (4.7)       | 26.9 (3.9)     | 0       |
| Systolic bloodpressure (mmHg)      | 138.2 (18.4)    | 135.1 (19.0)     | 141.6 (17.1)   | 3525    |
| Diastolic bloodpressure (mmHg)     | 78.6 (10.0)     | 76.8 (9.9)       | 80.5 (9.7)     | 2525    |
| Heart rate (bpm)                   | 62.5 (10.2)     | 63.5 (9.9)       | 61.5 (10.4)    | 577     |
| Cholesterol (mmol/l)               | 5.7 (1.1)       | 5.9 (1.1)        | 5.6 (1.1)      | 2340    |
| Diabetes                           | 1835 (5.1%)     | 669 (3.5%)       | 1166 (6.8%)    | 248     |
| <i>Smoking</i>                     |                 |                  |                | 248     |
| Past                               | 12227 (33.7%)   | 5891 (30.9%)     | 6336 (36.7)    |         |
| Current                            | 1254 (3.5%)     | 541 (2.8%)       | 713 (4.1%)     |         |
| Alcohol intake- daily/almost daily | 6104 (16.8%)    | 2531 (13.3%)     | 3573 (20.7%)   | 248     |
| Moderate activity (MET minutes pw) | 826.7 (1120.3)  | 832.7 (1108.8)   | 820.6 (1133.9) | 5191    |
| <i>CMR parameters</i>              |                 |                  |                |         |
| LV-EDV (ml)                        | 143.2 (33.2)    | 125.1 (22.2)     | 163.5 (31.7)   | 4078    |
| LV-ESV (ml)                        | 58.8 (18.5)     | 48.9 (12.2)      | 69.8 (18.1)    | 4082    |
| LV-EDM (g)                         | 80.9 (22.4)     | 65.9 (12.6)      | 97.6 (18.9)    | 4077    |
| LV-MVR (g/ml)                      | 0.6 (0.1)       | 0.5 (0.1)        | 0.6 (0.1)      | 4087    |
| LV-SV (ml)                         | 84.4 (18.9)     | 76.2 (14.5)      | 93.7 (19.1)    | 4079    |
| LV-EF (%)                          | 59.4 (6.2)      | 61.0 (5.8)       | 57.5 (5.9)     | 4075    |
| LV-PFR (ml/s)                      | 321.1 (98.3)    | 303.4 (86.6)     | 341.0 (106.5)  | 4081    |
| LV-PER (ml/s)                      | 377.8 (111.9)   | 323.5 (84.8)     | 438.4 (106.5)  | 4075    |
| LV-PAFR (ml/s)                     | 251.8 (106.5)   | 225.6 (94.1)     | 280.9 (111.9)  | 4076    |
| RV-EDV (ml)                        | 153.7 (38)      | 131.0 (24.6)     | 178.7 (34.3)   | 676     |
| RV-ESV (ml)                        | 64.8 (22.0)     | 52.2 (14.1)      | 78.6 (20.9)    | 689     |
| RV-SV (ml)                         | 88.9 (20.5)     | 78.8 (15.2)      | 100.1 (19.8)   | 685     |
| RV-EF (%)                          | 58.5 (6.8)      | 60.4 (6.4)       | 56.3 (6.5)     | 742     |
| RV-PFR (ml/s)                      | 308.4 (96.3)    | 282.9 (82.8)     | 336.6 (102.1)  | 734     |
| RV-PER (ml/s)                      | 396.3 (111.2)   | 341.7 (83.1)     | 456.5 (107.1)  | 689     |
| RV-PAFR (ml/s)                     | 293.7 (108.6)   | 260.4 (92.3)     | 163.9 (31.4)   | 718     |

*General:*

Number represents mean/counts with between brackets the standard deviation or percentage. BMI= body mass index; CMR= cardiac magnetic resonance; EDV= end-diastolic volume; EDM= end-diastolic mass; EF= ejection fraction; ESV= end-systolic volume; LV= left ventricle; MET= metabolic equivalent of task; MVR= mass to volume ratio; PAFR= peak atrial filling rate; PER= peak ejection rate; PFR= peak filling rate; RV= right ventricle; SV= stroke volume.

**Table S4:** Assessing the potential for bias due to cryptic relatedness and population stratification.

| <b>CMR trait</b> | <b>LD-Score intercept (SE)</b> |
|------------------|--------------------------------|
| RV - EDV         | 1.02 (0.01)                    |
| RV - EF          | 1.00 (0.01)                    |
| RV - ESV         | 1.02 (0.01)                    |
| RV - PAFR        | 1.00 (0.01)                    |
| RV - PER         | 0.99 (0.01)                    |
| RV - PFR         | 1.01 (0.01)                    |
| RV - SV          | 1.00 (0.01)                    |
| LV - EDM         | 1.01 (0.01)                    |
| LV - MVR         | 1.01 (0.01)                    |
| LV - EDV         | 1.01 (0.01)                    |
| LV - EF          | 0.99 (0.01)                    |
| LV - ESV         | 1.00 (0.01)                    |
| LV - PAFR        | 1.00 (0.01)                    |
| LV - PER         | 1.01 (0.01)                    |
| LV - PFR         | 1.01 (0.01)                    |
| LV - SV          | 1.00 (0.01)                    |

*General:*  
In the absence of bias the intercept is expected to be 1.00. SE: standard error.

**Table S5:** Top hits from a cardiac MRI (CMR) GWAS on sixteen left and right-ventricle (LV, RV) traits.

| Marker name  | Chr | BP (build 37) | Nearest gene                       | Putative causal gene               | CMR trait | EF/NEA  | MD     | p-value                |
|--------------|-----|---------------|------------------------------------|------------------------------------|-----------|---------|--------|------------------------|
| rs2503715    | 1   | 2144107       | C1orf86<br>(ENSG00000162585)       | SKI<br>(ENSG00000157933)           | LV - MVR  | A/G     | -0.005 | 3.08×10 <sup>-8</sup>  |
| rs28579893   | 1   | 16347534      | HSPB7<br>(ENSG00000173641)         | HSPB7<br>(ENSG00000173641)         | LV - EF   | A/G     | 0.410  | 2.54×10 <sup>-17</sup> |
| rs28579893   | 1   | 16347534      | HSPB7<br>(ENSG00000173641)         | HSPB7<br>(ENSG00000173641)         | LV - ESV  | A/G     | -0.924 | 4.58×10 <sup>-15</sup> |
| rs945425     | 1   | 16348412      | HSPB7<br>(ENSG00000173641)         | HSPB7<br>(ENSG00000173641)         | RV - EF   | T/C     | 0.301  | 3.62×10 <sup>-10</sup> |
| rs6604061    | 1   | 92328613      | RN7SL653P<br>(ENSG00000239794)     | TGFBR3<br>(ENSG00000069702)        | RV - ESV  | T/A     | 0.689  | 2.18×10 <sup>-8</sup>  |
| rs3738685    | 1   | 228556788     | OBSCN<br>(ENSG00000154358)         | OBSCN<br>(ENSG00000154358)         | LV - ESV  | C/T     | -0.676 | 6.30×10 <sup>-9</sup>  |
| rs3738685    | 1   | 228556788     | OBSCN<br>(ENSG00000154358)         | OBSCN<br>(ENSG00000154358)         | RV - EF   | C/T     | 0.306  | 9.29×10 <sup>-11</sup> |
| rs12126782   | 1   | 228613648     | HIST3H3<br>(ENSG00000168148)       | HIST3H3<br>(ENSG00000168148)       | RV - ESV  | T/G     | -0.910 | 7.04×10 <sup>-13</sup> |
| rs1314982    | 2   | 26922062      | KCNK3<br>(ENSG00000171303)         | KCNK3<br>(ENSG00000171303)         | RV - EDV  | G/A     | 1.224  | 3.50×10 <sup>-8</sup>  |
| rs13394970   | 2   | 26929282      | KCNK3<br>(ENSG00000171303)         | KCNK3<br>(ENSG00000171303)         | RV - ESV  | T/G     | 0.761  | 5.06×10 <sup>-10</sup> |
| rs7461733772 | 2   | 179442292     | RP11-171I2.5<br>(ENSG00000271011)  | TTN<br>(ENSG00000155657)           | RV - ESV  | TA/T    | -1.090 | 1.43×10 <sup>-8</sup>  |
| rs12988307   | 2   | 179490478     | RP11-171I2.4<br>(ENSG00000271141)  | TTN<br>(ENSG00000155657)           | LV - ESV  | T/C     | 1.522  | 1.58×10 <sup>-27</sup> |
| rs2562845    | 2   | 179514433     | RP11-171I2.3<br>(ENSG00000271401)  | TTN<br>(ENSG00000155657)           | LV - EF   | T/C     | -0.539 | 4.98×10 <sup>-21</sup> |
| rs2042995    | 2   | 179558366     | RP11-171I2.1<br>(ENSG00000267784)  | TTN<br>(ENSG00000155657)           | RV - EDV  | T/C     | 1.620  | 1.77×10 <sup>-12</sup> |
| rs2042995    | 2   | 179558366     | RP11-171I2.1<br>(ENSG00000267784)  | TTN<br>(ENSG00000155657)           | RV - EF   | T/C     | -0.331 | 7.78×10 <sup>-10</sup> |
| rs2042995    | 2   | 179558366     | RP11-171I2.1<br>(ENSG00000267784)  | TTN<br>(ENSG00000155657)           | RV - ESV  | T/C     | 1.190  | 4.76×10 <sup>-17</sup> |
| rs1116929722 | 2   | 179669931     | CCDC141<br>(ENSG00000163492)       | TTN<br>(ENSG00000155657)           | LV - EDM  | C/T     | 1.809  | 1.81×10 <sup>-16</sup> |
| rs1116929722 | 2   | 179669931     | CCDC141<br>(ENSG00000163492)       | TTN<br>(ENSG00000155657)           | LV - EDV  | C/T     | 3.371  | 4.88×10 <sup>-17</sup> |
| rs6747402    | 2   | 179759434     | RNU7-104P<br>(ENSG00000238542)     | TTN<br>(ENSG00000155657)           | RV - EDV  | G/A     | -1.299 | 2.29×10 <sup>-11</sup> |
| rs6747402    | 2   | 179759434     | RNU7-104P<br>(ENSG00000238542)     | TTN<br>(ENSG00000155657)           | RV - ESV  | G/A     | -0.762 | 2.05×10 <sup>-10</sup> |
| rs55844607   | 2   | 179770998     | RNU7-104P<br>(ENSG00000238542)     | TTN<br>(ENSG00000155657)           | RV - SV   | A/G     | 1.147  | 4.65×10 <sup>-8</sup>  |
| rs35009641   | 2   | 220432957     | INHHA<br>(ENSG00000123999)         | DES<br>(ENSG00000175084)           | LV - MVR  | G/A     | -0.008 | 3.36×10 <sup>-8</sup>  |
| rs2007753993 | 3   | 14291003      | RP11-536I6.2<br>(ENSG00000255021)  | TMEM43<br>(ENSG00000170876)        | LV - EF   | CTTTT/C | -0.271 | 2.18×10 <sup>-8</sup>  |
| rs11710541   | 3   | 14291679      | RP11-536I6.2<br>(ENSG00000255021)  | TMEM43<br>(ENSG00000170876)        | LV - ESV  | T/C     | 0.804  | 9.02×10 <sup>-12</sup> |
| rs2170454    | 3   | 14294549      | RP11-536I6.2<br>(ENSG00000255021)  | TMEM43<br>(ENSG00000170876)        | RV - ESV  | T/C     | -0.990 | 1.49×10 <sup>-16</sup> |
| rs10865722   | 3   | 14306782      | RP11-536I6.2<br>(ENSG00000255021)  | TMEM43<br>(ENSG00000170876)        | RV - EF   | G/T     | -0.375 | 1.15×10 <sup>-14</sup> |
| rs34234056   | 3   | 14418444      | RNA5SP124<br>(ENSG00000199609)     | TMEM43<br>(ENSG00000170876)        | RV - ESV  | A/G     | 0.655  | 4.52×10 <sup>-8</sup>  |
| rs6795970    | 3   | 38766675      | SCN10A<br>(ENSG00000185313)        | SCN10A<br>(ENSG00000185313)        | RV - PAFR | A/G     | -4.711 | 4.44×10 <sup>-10</sup> |
| rs57848867   | 3   | 99779984      | FILIP1L<br>(ENSG00000168386)       | CMSS1<br>(ENSG00000184220)         | RV - EDV  | A/T     | -1.223 | 4.03×10 <sup>-10</sup> |
| rs57848867   | 3   | 99779984      | FILIP1L<br>(ENSG00000168386)       | CMSS1<br>(ENSG00000184220)         | RV - ESV  | A/T     | -0.674 | 2.29×10 <sup>-8</sup>  |
| rs1114873013 | 3   | 109560677     | RP11-457K10.1<br>(ENSG00000242029) | RP11-457K10.1<br>(ENSG00000242029) | LV - SV   | ATG/A   | 0.735  | 2.28×10 <sup>-8</sup>  |
| rs11710570   | 3   | 158056654     | RP11-113A11.1<br>(ENSG00000241723) | MLF1<br>(ENSG00000178053)          | RV - EDV  | T/C     | -1.206 | 4.82×10 <sup>-10</sup> |
| rs9844502    | 3   | 158298615     | MLF1<br>(ENSG00000178053)          | MLF1<br>(ENSG00000178053)          | RV - ESV  | C/T     | -0.915 | 1.97×10 <sup>-14</sup> |

**Table S5:** Top hits from a cardiac MRI (CMR) GWAS on sixteen left and right-ventricle (LV, RV) traits. (continued)

| Marker name | Chr | BP (build 37) | Nearest gene                           | Putative causal gene          | CMR trait | EF/NEA   | MD     | p-value                |
|-------------|-----|---------------|----------------------------------------|-------------------------------|-----------|----------|--------|------------------------|
| rs9864508   | 3   | 158298703     | MLF1                                   | MLF1                          | RV - EF   | T/C      | 0.284  | 3.44×10 <sup>-10</sup> |
| rs10939649  | 4   | 16034589      | RNU6-350P<br>(ENSG00000251758)         | PROM1<br>(ENSG0000007062)     | LV - EF   | C/T      | 0.330  | 3.00×10 <sup>-10</sup> |
| rs34463475  | 4   | 120438654     | PDE5A<br>(ENSG00000138735)             | PDE5A<br>(ENSG00000138735)    | RV - ESV  | CT/C     | -0.764 | 1.17×10 <sup>-8</sup>  |
| rs12514667  | 5   | 138718825     | SLC23A1<br>(ENSG00000170482)           | PROB1<br>(ENSG00000228672)    | RV - ESV  | C/G      | -0.695 | 4.61×10 <sup>-8</sup>  |
| rs11242465  | 5   | 138762305     | DNAJC18<br>(ENSG00000170464)           | PROB1<br>(ENSG00000228672)    | LV - ESV  | T/G      | -0.681 | 4.92×10 <sup>-8</sup>  |
| rs4835729   | 5   | 138763329     | DNAJC18<br>(ENSG00000170464)           | PROB1<br>(ENSG00000228672)    | LV - EF   | A/G      | 0.299  | 9.11×10 <sup>-10</sup> |
| rs4835730   | 5   | 138763807     | DNAJC18<br>(ENSG00000170464)           | PROB1<br>(ENSG00000228672)    | RV - EF   | T/C      | 0.328  | 1.27×10 <sup>-11</sup> |
| rs34504162  | 6   | 31310626      | HLA-B<br>(ENSG00000234745)             | HLA-B<br>(ENSG00000234745)    | LV - MVR  | A/G      | -0.004 | 3.09×10 <sup>-8</sup>  |
| rs9265867   | 6   | 31312790      | HLA-B<br>(ENSG00000234745)             | HLA-B<br>(ENSG00000234745)    | RV - PER  | A/T      | -5.435 | 1.95×10 <sup>-9</sup>  |
| rs111721712 | 6   | 31315407      | HLA-B<br>(ENSG00000234745)             | HLA-B<br>(ENSG00000234745)    | LV - SV   | C/CT     | 0.702  | 5.36×10 <sup>-9</sup>  |
| rs281874821 | 6   | 32631426      | XXbac-BPG254F23.6<br>(ENSG00000241287) | HLA-DRB1<br>(ENSG00000196126) | LV - EF   | G/A      | -0.327 | 9.09×10 <sup>-9</sup>  |
| rs7774130   | 6   | 36623756      | RNU1-88P<br>(ENSG00000238554)          | CDKN1A<br>(ENSG00000124762)   | LV - EDM  | C/T      | -0.760 | 4.24×10 <sup>-10</sup> |
| rs730506    | 6   | 36645968      | CDKN1A<br>(ENSG00000124762)            | CDKN1A<br>(ENSG00000124762)   | LV - MVR  | G/C      | -0.007 | 1.51×10 <sup>-18</sup> |
| rs147436240 | 6   | 36648064      | CDKN1A<br>(ENSG00000124762)            | CDKN1A<br>(ENSG00000124762)   | LV - EF   | CGCGT/C  | -0.339 | 7.97×10 <sup>-9</sup>  |
| rs11153730  | 6   | 118667522     | SLC35F1<br>(ENSG00000196376)           | PLN<br>(ENSG00000198523)      | LV - EDV  | T/C      | -1.114 | 4.57×10 <sup>-9</sup>  |
| rs74640693  | 6   | 118684824     | SLC35F1<br>(ENSG00000196376)           | PLN<br>(ENSG00000198523)      | LV - MVR  | A/T      | -0.008 | 5.46×10 <sup>-9</sup>  |
| rs73238147  | 7   | 128469917     | FLNC<br>(ENSG00000128591)              | CCDC136<br>(ENSG00000128596)  | LV - ESV  | T/C      | 0.976  | 1.63×10 <sup>-9</sup>  |
| rs3918226   | 7   | 150690176     | NOS3<br>(ENSG00000164867)              | KCNH2<br>(ENSG00000055118)    | RV - EDV  | C/T      | 2.051  | 1.65×10 <sup>-8</sup>  |
| rs3918226   | 7   | 150690176     | NOS3<br>(ENSG00000164867)              | KCNH2<br>(ENSG00000055118)    | RV - SV   | C/T      | 1.272  | 5.93×10 <sup>-9</sup>  |
| rs2980441   | 8   | 8095129       | ALG1L13P<br>(ENSG00000253981)          | LRLE1<br>(ENSG00000268955)    | RV - EF   | G/C      | -0.261 | 9.87×10 <sup>-9</sup>  |
| rs66645639  | 8   | 9591977       | MIR597<br>(ENSG00000207701)            | TNKS<br>(ENSG00000173273)     | LV - EF   | TTACTC/T | 0.267  | 1.56×10 <sup>-8</sup>  |
| rs7823349   | 8   | 10998630      | AF131215.4<br>(ENSG00000254556)        | MTMR9<br>(ENSG00000104643)    | RV - EF   | G/T      | 0.266  | 5.44×10 <sup>-9</sup>  |
| rs13268810  | 8   | 11797430      | OR7E161P<br>(ENSG00000206014)          | CTSB<br>(ENSG00000164733)     | LV - EF   | A/T      | -0.265 | 1.53×10 <sup>-8</sup>  |
| rs12541595  | 8   | 125857359     | LINC00964<br>(ENSG00000249816)         | ZNF572<br>(ENSG00000180938)   | LV - EF   | G/T      | -0.348 | 2.66×10 <sup>-12</sup> |
| rs200712209 | 8   | 125858538     | LINC00964<br>(ENSG00000249816)         | ZNF572<br>(ENSG00000180938)   | LV - ESV  | GA/G     | 0.879  | 4.63×10 <sup>-13</sup> |
| rs34866937  | 8   | 125859850     | LINC00964<br>(ENSG00000249816)         | ZNF572<br>(ENSG00000180938)   | RV - EF   | G/A      | -0.284 | 6.42×10 <sup>-9</sup>  |
| rs11784619  | 8   | 145013775     | MIR661<br>(ENSG00000207574)            | PLEC<br>(ENSG00000178209)     | LV - EF   | G/A      | -0.563 | 1.61×10 <sup>-8</sup>  |
| rs11786896  | 8   | 145018354     | MIR661<br>(ENSG00000207574)            | PLEC<br>(ENSG00000178209)     | RV - EF   | C/T      | -0.702 | 2.67×10 <sup>-11</sup> |
| rs11786896  | 8   | 145018354     | MIR661<br>(ENSG00000207574)            | PLEC<br>(ENSG00000178209)     | RV - ESV  | C/T      | 1.805  | 8.29×10 <sup>-11</sup> |
| rs3812629   | 10  | 75407290      | SYNPO2L<br>(ENSG00000166317)           | SYNPO2L<br>(ENSG00000166317)  | LV - EDM  | G/A      | -0.823 | 3.36×10 <sup>-8</sup>  |
| rs10886511  | 10  | 121307823     | RGS10<br>(ENSG00000148908)             | BAG3<br>(ENSG00000151929)     | RV - ESV  | G/A      | 0.793  | 2.39×10 <sup>-9</sup>  |
| rs72840788  | 10  | 121415685     | BAG3<br>(ENSG00000151929)              | BAG3<br>(ENSG00000151929)     | LV - EDV  | G/A      | 1.551  | 2.83×10 <sup>-11</sup> |
| rs72840788  | 10  | 121415685     | BAG3<br>(ENSG00000151929)              | BAG3<br>(ENSG00000151929)     | LV - EF   | G/A      | -0.581 | 3.98×10 <sup>-25</sup> |



**Table S5:** Top hits from a cardiac MRI (CMR) GWAS on sixteen left and right-ventricle (LV, RV) traits. (continued)

| Marker name | Chr | BP (build 37) | Nearest gene                       | Putative causal gene         | CMR trait | EF/NEA | MD     | p-value                |
|-------------|-----|---------------|------------------------------------|------------------------------|-----------|--------|--------|------------------------|
| rs72840788  | 10  | 121415685     | BAG3<br>(ENSG00000151929)          | BAG3<br>(ENSG00000151929)    | LV - ESV  | G/A    | 1.463  | 1.12×10 <sup>-26</sup> |
| rs72840788  | 10  | 121415685     | BAG3<br>(ENSG00000151929)          | BAG3<br>(ENSG00000151929)    | RV - EF   | G/A    | -0.544 | 1.21×10 <sup>-22</sup> |
| rs72840788  | 10  | 121415685     | BAG3<br>(ENSG00000151929)          | BAG3<br>(ENSG00000151929)    | RV - ESV  | G/A    | 1.303  | 6.41×10 <sup>-19</sup> |
| rs1609342   | 11  | 14022662      | SPON1<br>(ENSG00000152268)         | SPON1<br>(ENSG00000152268)   | RV - ESV  | C/T    | -0.684 | 1.32×10 <sup>-8</sup>  |
| rs61884835  | 11  | 14052348      | SPON1<br>(ENSG00000152268)         | SPON1<br>(ENSG00000152268)   | LV - ESV  | T/C    | -0.667 | 2.42×10 <sup>-9</sup>  |
| rs6488162   | 12  | 33593127      | SYT10<br>(ENSG00000110975)         | SYT10<br>(ENSG00000110975)   | LV - SV   | T/C    | -0.782 | 1.61×10 <sup>-10</sup> |
| rs1585897   | 12  | 66383320      | HMG2<br>(ENSG00000149948)          | HMG2<br>(ENSG00000149948)    | RV - EDV  | C/A    | 1.104  | 1.79×10 <sup>-8</sup>  |
| rs4766578   | 12  | 111904371     | ATXN2<br>(ENSG00000204842)         | ATXN2<br>(ENSG00000204842)   | RV - EDV  | T/A    | -1.913 | 9.14×10 <sup>-23</sup> |
| rs4766578   | 12  | 111904371     | ATXN2<br>(ENSG00000204842)         | ATXN2<br>(ENSG00000204842)   | RV - SV   | T/A    | -0.869 | 1.32×10 <sup>-13</sup> |
| rs597808    | 12  | 111973358     | U7<br>(ENSG00000272215)            | ATXN2<br>(ENSG00000204842)   | LV - SV   | A/G    | -0.750 | 4.57×10 <sup>-10</sup> |
| rs653178    | 12  | 112007756     | U7<br>(ENSG00000272215)            | ATXN2<br>(ENSG00000204842)   | LV - EDV  | C/T    | -1.295 | 1.20×10 <sup>-11</sup> |
| rs653178    | 12  | 112007756     | U7<br>(ENSG00000272215)            | ATXN2<br>(ENSG00000204842)   | RV - ESV  | C/T    | -1.062 | 8.93×10 <sup>-19</sup> |
| rs11513729  | 12  | 112273499     | MAPKAPK5-AS1<br>(ENSG00000234608)  | ALDH2<br>(ENSG00000111275)   | RV - PER  | C/T    | 3.952  | 4.85×10 <sup>-9</sup>  |
| rs11066320  | 12  | 112906415     | PTPN11<br>(ENSG00000179295)        | PTPN11<br>(ENSG00000179295)  | RV - EDV  | A/G    | -1.593 | 9.96×10 <sup>-16</sup> |
| rs11066320  | 12  | 112906415     | PTPN11<br>(ENSG00000179295)        | PTPN11<br>(ENSG00000179295)  | RV - SV   | A/G    | -0.777 | 8.12×10 <sup>-11</sup> |
| rs1895606   | 12  | 114833384     | TBX5-AS1<br>(ENSG00000255399)      | TBX5<br>(ENSG00000089225)    | RV - ESV  | C/T    | -0.680 | 1.76×10 <sup>-8</sup>  |
| rs34647020  | 14  | 71796137      | RP1-261D10.1<br>(ENSG00000259079)  | SIP1L1<br>(ENSG00000197555)  | LV - MVR  | G/GT   | -0.004 | 4.86×10 <sup>-8</sup>  |
| rs56864281  | 15  | 85357649      | ALPK3<br>(ENSG00000136383)         | ALPK3<br>(ENSG00000136383)   | LV - MVR  | C/A    | 0.007  | 4.71×10 <sup>-24</sup> |
| rs7164817   | 15  | 85379544      | SNORA25<br>(ENSG00000200991)       | ALPK3<br>(ENSG00000136383)   | LV - EF   | T/C    | -0.274 | 2.08×10 <sup>-8</sup>  |
| rs12907646  | 15  | 85403496      | SNORA25<br>(ENSG00000200991)       | ALPK3<br>(ENSG00000136383)   | LV - ESV  | G/A    | -0.897 | 2.36×10 <sup>-11</sup> |
| rs6598541   | 15  | 99271135      | MIR4714<br>(ENSG00000264480)       | IGF1R<br>(ENSG00000140443)   | LV - EDM  | A/G    | -0.611 | 1.88×10 <sup>-8</sup>  |
| rs7166287   | 15  | 99273075      | MIR4714<br>(ENSG00000264480)       | IGF1R<br>(ENSG00000140443)   | LV - MVR  | C/T    | -0.004 | 1.12×10 <sup>-10</sup> |
| rs11350493  | 16  | 951372        | LA16c-306A4.2<br>(ENSG00000260316) | LMF1<br>(ENSG00000103227)    | LV - MVR  | TG/T   | -0.004 | 2.29×10 <sup>-8</sup>  |
| rs12452627  | 17  | 1302472       | YWHAE<br>(ENSG00000108953)         | YWHAE<br>(ENSG00000108953)   | LV - MVR  | G/A    | -0.007 | 2.05×10 <sup>-11</sup> |
| rs2302455   | 17  | 1374195       | MYO1C<br>(ENSG00000197879)         | CRK<br>(ENSG00000167193)     | LV - EDV  | G/A    | 1.783  | 3.09×10 <sup>-9</sup>  |
| rs2302455   | 17  | 1374195       | MYO1C<br>(ENSG00000197879)         | CRK<br>(ENSG00000167193)     | LV - ESV  | G/A    | 1.031  | 5.52×10 <sup>-9</sup>  |
| rs11869286  | 17  | 37813856      | STARD3<br>(ENSG00000131748)        | PPP1R1B<br>(ENSG00000131771) | LV - EDM  | G/C    | -0.619 | 1.74×10 <sup>-8</sup>  |
| rs2696421   | 17  | 43667635      | DND1P1<br>(ENSG00000264070)        | KANSL1<br>(ENSG00000120071)  | LV - MVR  | A/G    | -0.005 | 5.82×10 <sup>-12</sup> |
| rs567642046 | 17  | 44358811      | ARL17B<br>(ENSG00000228696)        | KANSL1<br>(ENSG00000120071)  | LV - EDM  | G/A    | -0.941 | 1.87×10 <sup>-11</sup> |
| rs17692129  | 17  | 44793283      | RPS7P11<br>(ENSG00000213326)       | NSF<br>(ENSG00000073969)     | LV - MVR  | C/T    | 0.004  | 2.50×10 <sup>-10</sup> |
| rs17608766  | 17  | 45013271      | RP11-156P1.2<br>(ENSG00000262633)  | GOSR2<br>(ENSG00000108433)   | RV - EDV  | T/C    | -1.752 | 2.14×10 <sup>-10</sup> |
| rs17608766  | 17  | 45013271      | RP11-156P1.2<br>(ENSG00000262633)  | GOSR2<br>(ENSG00000108433)   | RV - ESV  | T/C    | -1.129 | 3.33×10 <sup>-11</sup> |
| rs772756888 | 18  | 34219777      | SNORD112<br>(ENSG00000252078)      | FHOD3<br>(ENSG00000134775)   | RV - EF   | G/GTT  | -0.331 | 4.03×10 <sup>-10</sup> |

**Table S5:** Top hits from a cardiac MRI (CMR) GWAS on sixteen left and right-ventricle (LV, RV) traits. (*continued*)

| Marker name | Chr | BP (build 37) | Nearest gene                       | Putative causal gene         | CMR trait | EF/NEA | MD     | p-value                |
|-------------|-----|---------------|------------------------------------|------------------------------|-----------|--------|--------|------------------------|
| rs7230600   | 18  | 55938204      | RP11-718I15.1<br>(ENSG00000267743) | NEDD4L<br>(ENSG00000049759)  | LV - ESV  | G/A    | -0.693 | 3.66×10 <sup>-9</sup>  |
| rs10871753  | 18  | 55956865      | RP11-845C23.2<br>(ENSG00000267504) | NEDD4L<br>(ENSG00000049759)  | LV - EF   | G/T    | -0.267 | 6.77×10 <sup>-9</sup>  |
| rs35226705  | 19  | 46301456      | RSPH6A<br>(ENSG00000104941)        | DMPK<br>(ENSG00000104936)    | RV - EDV  | A/C    | 1.086  | 2.04×10 <sup>-8</sup>  |
| rs56096557  | 19  | 46310895      | RSPH6A<br>(ENSG00000104941)        | DMPK<br>(ENSG00000104936)    | RV - ESV  | A/C    | -0.813 | 8.08×10 <sup>-11</sup> |
| rs10421891  | 19  | 46315809      | RSPH6A<br>(ENSG00000104941)        | DMPK<br>(ENSG00000104936)    | LV - EDV  | A/G    | -1.186 | 2.09×10 <sup>-9</sup>  |
| rs10421891  | 19  | 46315809      | RSPH6A<br>(ENSG00000104941)        | DMPK<br>(ENSG00000104936)    | LV - ESV  | A/G    | -0.775 | 2.60×10 <sup>-11</sup> |
| rs4811602   | 20  | 36849088      | KIAA1755<br>(ENSG00000149633)      | TGM2<br>(ENSG00000198959)    | RV - SV   | G/A    | -0.658 | 2.52×10 <sup>-8</sup>  |
| rs5760054   | 22  | 24161717      | DERL3<br>(ENSG00000099958)         | SMARCB1<br>(ENSG00000099956) | LV - ESV  | C/T    | -1.027 | 2.07×10 <sup>-13</sup> |
| rs5760054   | 22  | 24161717      | DERL3<br>(ENSG00000099958)         | SMARCB1<br>(ENSG00000099956) | LV - MVR  | C/T    | 0.006  | 8.45×10 <sup>-13</sup> |
| rs5760054   | 22  | 24161717      | DERL3<br>(ENSG00000099958)         | SMARCB1<br>(ENSG00000099956) | LV - EF   | C/T    | 0.387  | 1.34×10 <sup>-11</sup> |
| rs133890    | 22  | 26160161      | MYO18B<br>(ENSG00000133454)        | MYO18B<br>(ENSG00000133454)  | LV - MVR  | C/G    | -0.004 | 2.33×10 <sup>-9</sup>  |

*General:*

Putative causal genes were identified through consensus based on extensive annotations, see online methods. CMR: cardiac MRI; Chr: chromosome; BP: base pair location; EA: effect allele; NEA: non-effect allele; EAF: effect allele frequency; MD: mean difference coded towards the EA; SE: standard error of the MD.

**Table S6:** CMR genes encoding druggable and drugged proteins

| Putative causal gene          | Protein                                | Target type    | Druggability | Compound                 | Molecule type  | Drug mechanism |
|-------------------------------|----------------------------------------|----------------|--------------|--------------------------|----------------|----------------|
| CDKN1A<br>(ENSG00000124762)   | CDN1A (P38936)                         |                | Druggable    |                          |                |                |
| CTSB<br>(ENSG00000164733)     | CATB (P07858)                          |                | Druggable    |                          |                |                |
| DMPK<br>(ENSG00000104936)     | DMPK (Q09013)                          |                | Druggable    |                          |                |                |
| HLA-B<br>(ENSG00000234745)    | 1B48 1B81 1B67 1B42 1B07 1B73 (P30486) |                | Druggable    |                          |                |                |
| OBSCN<br>(ENSG00000154358)    | OBSCN (Q5VST9)                         |                | Druggable    |                          |                |                |
| PROM1<br>(ENSG00000007062)    | PROM1 (O43490)                         |                | Druggable    |                          |                |                |
| PTPN11<br>(ENSG00000179295)   | PTN11 (Q06124)                         |                | Druggable    | Tno-155                  | Small molecule | Inhibitor      |
| TGFBR3<br>(ENSG00000069702)   | TGBR3 (Q03167)                         |                | Druggable    |                          |                |                |
| TGM2<br>(ENSG00000198959)     | TGM2 (P21980)                          |                | Druggable    |                          |                |                |
| TTN<br>(ENSG00000155657)      | TITIN (Q8WZ42)                         |                | Druggable    |                          |                |                |
| ALDH2<br>(ENSG00000111275)    | ALDH2 (P05091)                         | Single Protein | Drugged      | Disulfiram               | Small molecule | Inhibitor      |
| HLA-DRB1<br>(ENSG00000196126) | 2B1F (P01911)                          | Single Protein | Drugged      | Lym-1                    | Antibody       | Other          |
|                               | 2B11 (P04229)                          | Protein Family | Drugged      | Lym-1                    | Antibody       | Other          |
|                               | 2B1G (Q29974)                          | Protein Family | Drugged      | Lym-1                    | Antibody       | Other          |
|                               | 2B1E (Q9GIY3)                          | Protein Family | Drugged      | Lym-1                    | Antibody       | Other          |
|                               |                                        |                |              | Plovamer Acetate         | Small molecule | Modulator      |
|                               |                                        |                |              | Plovamer Acetate         | Small molecule | Modulator      |
|                               |                                        |                |              | Plovamer Acetate         | Small molecule | Modulator      |
|                               |                                        |                |              | Plovamer Acetate         | Small molecule | Modulator      |
|                               |                                        |                |              | Apolizumab               | Antibody       | Inhibitor      |
|                               |                                        |                |              | Apolizumab               | Antibody       | Inhibitor      |
|                               |                                        |                |              | Apolizumab               | Antibody       | Inhibitor      |
|                               |                                        |                |              | Apolizumab               | Antibody       | Inhibitor      |
| IGF1R<br>(ENSG00000140443)    | IGF1R (P08069)                         | Single Protein | Drugged      | Mecasermin Rinfabate     | Protein        | Agonist        |
|                               |                                        |                |              | Mecasermin               | Protein        | Agonist        |
|                               |                                        |                |              | Aew-541                  | Small molecule | Inhibitor      |
|                               |                                        |                |              | PI-225B                  | Small molecule | Inhibitor      |
|                               |                                        |                |              | XI-228                   | Small molecule | Inhibitor      |
|                               |                                        |                |              | Axl-1717                 | Small molecule | Inhibitor      |
|                               |                                        |                |              | Bms-754807               | Small molecule | Inhibitor      |
|                               |                                        |                |              | Insm-18                  | Small molecule | Inhibitor      |
|                               |                                        |                |              | Kw-2450                  | Small molecule | Inhibitor      |
|                               |                                        |                |              | Linsitinib               | Small molecule | Inhibitor      |
|                               |                                        |                |              | Figitumumab              | Antibody       | Antagonist     |
|                               |                                        |                |              | Ganitumab                | Antibody       | Antagonist     |
|                               |                                        |                |              | Teprotumumab             | Antibody       | Antagonist     |
|                               |                                        |                |              | Cixutumumab              | Antibody       | Antagonist     |
|                               |                                        |                |              | Dalotuzumab              | Antibody       | Antagonist     |
|                               |                                        |                |              | Robatumumab              | Antibody       | Antagonist     |
|                               |                                        |                |              | Ave-1642                 | Antibody       | Antagonist     |
|                               |                                        |                |              | Biib-022                 | Antibody       | Inhibitor      |
|                               |                                        |                |              | Istiratumab              | Antibody       | Inhibitor      |
|                               |                                        |                |              | Conteltinib              | Small molecule | Inhibitor      |
| KCNH2<br>(ENSG00000055118)    | KCNH2 (Q12809)                         | Protein Family | Drugged      | Dofetilide               | Small molecule | Blocker        |
|                               |                                        |                |              | Ibutilide Fumarate       | Small molecule | Blocker        |
|                               |                                        |                |              | Amiodarone Hydrochloride | Small molecule | Blocker        |
|                               |                                        |                |              | Sotalol Hydrochloride    | Small molecule | Blocker        |
|                               |                                        |                |              | Azd7009                  | Small molecule | Blocker        |
|                               |                                        |                |              | Azd1305                  | Small molecule | Blocker        |

**Table S6:** CMR genes encoding druggable and drugged proteins  
(continued)

| Putative causal gene        | Protein        | Target type    | Druggability | Compound                      | Molecule type  | Drug mechanism |
|-----------------------------|----------------|----------------|--------------|-------------------------------|----------------|----------------|
| KCNK3<br>(ENSG00000171303)  | KCNK3 (O14649) | Single Protein | Drugged      | Vernakalant Hydrochloride     | Small molecule | Blocker        |
|                             |                |                |              | Dalfampridine                 | Small molecule | Blocker        |
|                             |                |                |              | Guanidine Hydrochloride       | Small molecule | Blocker        |
|                             |                |                |              | Nerispiridine                 | Small molecule | Blocker        |
|                             |                |                |              | Tedisamil                     | Small molecule | Blocker        |
|                             |                |                |              | Amifampridine                 | Small molecule | Blocker        |
|                             |                |                |              | Amifampridine Phosphate       | Small molecule | Blocker        |
|                             |                |                |              | Desflurane                    | Small molecule | Opener         |
|                             |                |                |              | Doxapram Hydrochloride        | Small molecule | Blocker        |
|                             |                |                |              | Sevoflurane                   | Small molecule | Opener         |
| PDE5A<br>(ENSG00000138735)  | PDE5A (O76074) | Single Protein | Drugged      | Halothane                     | Small molecule | Opener         |
|                             |                |                |              | Isoflurane                    | Small molecule | Opener         |
|                             |                |                |              | Enflurane                     | Small molecule | Opener         |
|                             |                |                |              | Tadalafil                     | Small molecule | Inhibitor      |
|                             |                |                |              | Vardenafil Hydrochloride      | Small molecule | Inhibitor      |
|                             |                |                |              | Sildenafil Citrate            | Small molecule | Inhibitor      |
| SCN10A<br>(ENSG00000185313) | SCNAA (Q9Y5Y9) | Protein Family | Drugged      | Avanafil                      | Small molecule | Inhibitor      |
|                             |                |                |              | Udenafil                      | Small molecule | Inhibitor      |
|                             |                |                |              | Ibudilast                     | Small molecule | Inhibitor      |
|                             |                |                |              | Gisadenafil                   | Small molecule | Inhibitor      |
|                             |                |                |              | Pf-00489791                   | Small molecule | Inhibitor      |
|                             |                |                |              | Pentoxifylline                | Small molecule | Inhibitor      |
|                             |                |                |              | Dipyridamole                  | Small molecule | Inhibitor      |
|                             |                |                |              | Dibucaine Hydrochloride       | Small molecule | Blocker        |
|                             |                |                |              | Dsp-2230                      | Small molecule | Blocker        |
|                             |                |                |              | Afacifenacin                  | Small molecule | Blocker        |
|                             |                |                |              | Pf-04531083                   | Small molecule | Blocker        |
|                             |                |                |              | Quinidine Polygalacturonate   | Small molecule | Blocker        |
|                             |                |                |              | Ropivacaine Hydrochloride     | Small molecule | Blocker        |
|                             |                |                |              | Phenacemide                   | Small molecule | Blocker        |
|                             |                |                |              | Benoxinate Hydrochloride      | Small molecule | Blocker        |
|                             |                |                |              | Chloroprocaine Hydrochloride  | Small molecule | Blocker        |
|                             |                |                |              | Mexiletine Hydrochloride      | Small molecule | Blocker        |
|                             |                |                |              | Riluzole                      | Small molecule | Blocker        |
|                             |                |                |              | Hexylcaine Hydrochloride      | Small molecule | Blocker        |
|                             |                |                |              | Phenazopyridine Hydrochloride | Small molecule | Blocker        |
|                             |                |                |              | Quinidine Gluconate           | Small molecule | Blocker        |
|                             |                |                |              | Primidone                     | Small molecule | Blocker        |
|                             |                |                |              | Ethotoin                      | Small molecule | Blocker        |
|                             |                |                |              | Disopyramide Phosphate        | Small molecule | Blocker        |
|                             |                |                |              | Dronedarone Hydrochloride     | Small molecule | Blocker        |
|                             |                |                |              | Dyclonine Hydrochloride       | Small molecule | Blocker        |
|                             |                |                |              | Quinidine Sulfate             | Small molecule | Blocker        |
|                             |                |                |              | Prilocaine                    | Small molecule | Blocker        |
|                             |                |                |              | Phenytoin Sodium              | Small molecule | Blocker        |
|                             |                |                |              | Topiramate                    | Small molecule | Blocker        |
|                             |                |                |              | Merethoxylline Procaine       | Small molecule | Blocker        |
|                             |                |                |              | Procaine Hydrochloride        | Small molecule | Blocker        |
|                             |                |                |              | Mephenytoin                   | Small molecule | Blocker        |
|                             |                |                |              | Carbamazepine                 | Small molecule | Blocker        |
|                             |                |                |              | Articaine Hydrochloride       | Small molecule | Blocker        |
|                             |                |                |              | Tetracaine                    | Small molecule | Blocker        |
|                             |                |                |              | Erlosamide                    | Small molecule | Blocker        |
|                             |                |                |              | Mepivacaine Hydrochloride     | Small molecule | Blocker        |
|                             |                |                |              | Moricizine Hydrochloride      | Small molecule | Blocker        |
|                             |                |                |              | Etidocaine Hydrochloride      | Small molecule | Blocker        |
|                             |                |                |              | Orphenadrine Hydrochloride    | Small molecule | Blocker        |
|                             |                |                |              | Orphenadrine Citrate          | Small molecule | Blocker        |
| Procaïnamide Hydrochloride  | Small molecule | Blocker        |              |                               |                |                |
| Propafenone Hydrochloride   | Small molecule | Blocker        |              |                               |                |                |

**Table S6:** CMR genes encoding druggable and drugged proteins  
(continued)

| Putative causal gene      | Protein        | Target type | Druggability | Compound                   | Molecule type  | Drug mechanism |
|---------------------------|----------------|-------------|--------------|----------------------------|----------------|----------------|
|                           |                |             |              | Proparacaine Hydrochloride | Small molecule | Blocker        |
|                           |                |             |              | Propoxycaine Hydrochloride | Small molecule | Blocker        |
|                           |                |             |              | Rufinamide                 | Small molecule | Blocker        |
|                           |                |             |              | Oxcarbazepine              | Small molecule | Blocker        |
|                           |                |             |              | Phenytoin                  | Small molecule | Blocker        |
|                           |                |             |              | Prilocaine Hydrochloride   | Small molecule | Blocker        |
|                           |                |             |              | Fosphenytoin Sodium        | Small molecule | Blocker        |
|                           |                |             |              | Indecainide Hydrochloride  | Small molecule | Blocker        |
|                           |                |             |              | Lamotrigine                | Small molecule | Blocker        |
|                           |                |             |              | Lidocaine                  | Small molecule | Blocker        |
|                           |                |             |              | Lidocaine Hydrochloride    | Small molecule | Blocker        |
|                           |                |             |              | Tocainide Hydrochloride    | Small molecule | Blocker        |
|                           |                |             |              | Zonisamide                 | Small molecule | Blocker        |
|                           |                |             |              | Eslicarbazepine Acetate    | Small molecule | Blocker        |
|                           |                |             |              | Evenamide                  | Small molecule | Blocker        |
|                           |                |             |              | Nktr-171                   | Small molecule | Blocker        |
|                           |                |             |              | Irampanel                  | Small molecule | Blocker        |
|                           |                |             |              | Nerispiridine              | Small molecule | Blocker        |
|                           |                |             |              | Ralfinamide                | Small molecule | Blocker        |
|                           |                |             |              | Tetracaine Hydrochloride   | Small molecule | Blocker        |
|                           |                |             |              | Eslicarbazepine            | Small molecule | Blocker        |
|                           |                |             |              | Encainide Hydrochloride    | Small molecule | Blocker        |
|                           |                |             |              | Dichlorobenzyl Alcohol     | Small molecule | Blocker        |
|                           |                |             |              | Cenobamate                 | Small molecule | Inhibitor      |
| TNKS<br>(ENSG00000173273) | TNKS1 (O95271) |             | Drugged      | 2X-121                     | Small molecule | Inhibitor      |

*General:*  
Data were extracted from British National Formulary, and ChEMBL. Genes are provided with ensembl id, and proteins with uniprot id.

**Table S7:** Cardiometabolic drug indications of compounds targeting proteins encoded by CMR genes

| Putative causal gene       | Protein        | Target type    | Compound                  | Drug mechanism | Drug indication                                                                                                                                                                                                                                                                 |
|----------------------------|----------------|----------------|---------------------------|----------------|---------------------------------------------------------------------------------------------------------------------------------------------------------------------------------------------------------------------------------------------------------------------------------|
| IGF1R<br>(ENSG00000140443) | IGF1R (P08069) | Single Protein | Mecasermin                | Agonist        | Diabetes Mellitus                                                                                                                                                                                                                                                               |
| KCNH2<br>(ENSG00000055118) | KCNH2 (Q12809) | Protein Family | Dofetilide                | Blocker        | Atrial Fibrillation                                                                                                                                                                                                                                                             |
|                            |                |                | Amiodarone Hydrochloride  | Blocker        | Heart Failure<br>Arrhythmias, Cardiac<br>Amyloidosis                                                                                                                                                                                                                            |
|                            |                |                |                           | Blocker        | Atrial Fibrillation<br>Heart Failure                                                                                                                                                                                                                                            |
|                            |                |                | Sotalol Hydrochloride     | Blocker        | Atrial Fibrillation<br>Heart Failure                                                                                                                                                                                                                                            |
|                            |                |                | Azd7009                   | Blocker        | Atrial Fibrillation                                                                                                                                                                                                                                                             |
|                            |                |                | Azd1305                   | Blocker        | Atrial Fibrillation                                                                                                                                                                                                                                                             |
|                            |                |                | Vernakalant Hydrochloride | Blocker        | Atrial Flutter<br>Atrial Fibrillation                                                                                                                                                                                                                                           |
|                            |                |                |                           | Blocker        | Stroke                                                                                                                                                                                                                                                                          |
|                            |                |                | Tedisamil                 | Blocker        | Arrhythmias, Cardiac                                                                                                                                                                                                                                                            |
|                            |                |                | Sevoflurane               | Opener         | Heart Diseases                                                                                                                                                                                                                                                                  |
| KCNK3<br>(ENSG00000171303) | KCNK3 (O14649) | Single Protein | Isoflurane                | Opener         | Aneurysm<br>Coronary Disease<br>Heart Diseases                                                                                                                                                                                                                                  |
|                            |                |                | Tadalafil                 | Inhibitor      | Heart Failure                                                                                                                                                                                                                                                                   |
| PDE5A<br>(ENSG00000138735) | PDE5A (O76074) | Single Protein | Sildenafil Citrate        | Inhibitor      | Essential Hypertension<br>Diabetes Mellitus<br>Hypertension<br>Stroke<br>Lung Diseases, Interstitial                                                                                                                                                                            |
|                            |                |                |                           |                | Stroke                                                                                                                                                                                                                                                                          |
|                            |                |                |                           |                | Ischemia<br>Emphysema<br>Hypertension<br>Pre-Eclampsia<br>Heart Failure                                                                                                                                                                                                         |
|                            |                |                | Udenafil                  | Inhibitor      | Heart Diseases<br>Hypertension<br>Heart Failure                                                                                                                                                                                                                                 |
|                            |                |                |                           |                | Lung Diseases, Obstructive<br>Pneumonia                                                                                                                                                                                                                                         |
|                            |                |                | Gisadenafil               | Inhibitor      | Pulmonary Disease, Chronic Obstructive                                                                                                                                                                                                                                          |
|                            |                |                | Pf-00489791               | Inhibitor      | Hypertension                                                                                                                                                                                                                                                                    |
|                            |                |                | Pentoxifylline            | Inhibitor      | Anemia<br>Coronary Disease<br>Fibrosis<br>Sarcoidosis<br>Acute Coronary Syndrome<br>Cardiovascular Diseases                                                                                                                                                                     |
|                            |                |                | Dipyridamole              | Inhibitor      | Hypertension<br>Anemia<br>Coronary Disease<br>Heart Diseases<br>Carotid Stenosis<br>Ischemia<br>Angina, Stable<br>Coronary Artery Disease<br>Thrombosis<br>Stroke<br>Adjunct to oral anticoagulation for prophylaxis of thromboembolism associated with prosthetic heart valves |

**Table S7:** Cardiometabolic drug indications of compounds targeting proteins encoded by CMR genes (*continued*)

| Putative causal gene        | Protein        | Target type    | Compound                    | Drug mechanism | Drug indication                                                                                  |
|-----------------------------|----------------|----------------|-----------------------------|----------------|--------------------------------------------------------------------------------------------------|
| SCN10A<br>(ENSG00000185313) | SCNAA (Q9Y5Y9) | Protein Family | Quinidine Polygalacturonate | Blocker        | Secondary prevention of ischaemic stroke and transient ischaemic attacks<br>Arrhythmias, Cardiac |
|                             |                |                | Primidone                   | Blocker        | Stroke                                                                                           |
|                             |                |                | Disopyramide Phosphate      | Blocker        | Atrial Fibrillation<br>Heart Failure                                                             |
|                             |                |                | Dronedarone Hydrochloride   | Blocker        | Atrial Fibrillation                                                                              |
|                             |                |                | Topiramate                  | Blocker        | Ischemia<br>Diabetes Mellitus                                                                    |
|                             |                |                | Procainamide Hydrochloride  | Blocker        | Hypertension<br>Atrial Fibrillation<br>Heart Failure                                             |
|                             |                |                | Propafenone Hydrochloride   | Blocker        | Atrial Fibrillation<br>Heart Failure                                                             |
|                             |                |                | Phenytoin                   | Blocker        | Anemia                                                                                           |
|                             |                |                | Lidocaine                   | Blocker        | Hypertension<br>Thromboembolism<br>Heart Diseases<br>Heart Arrest<br>Pre-Eclampsia<br>Stroke     |
|                             |                |                | Lidocaine Hydrochloride     | Blocker        | Arrhythmias, Cardiac<br>Hypertension<br>Diabetes Mellitus                                        |

*General:*  
Data were extracted from British National Formulary, and ChEMBL. Genes are provided with ensembl id, and proteins with uniprot id.

**Table S8:** Cardiometabolic drug side-effects of compounds targeting proteins encoded by CMR genes

| Putative causal gene       | Protein        | Target type                                                                                                                                                                                      | Compound                   | Drug mechanism | Drug side-effects                                                                                                                                      |            |           |                                                                                                                                                                                                    |
|----------------------------|----------------|--------------------------------------------------------------------------------------------------------------------------------------------------------------------------------------------------|----------------------------|----------------|--------------------------------------------------------------------------------------------------------------------------------------------------------|------------|-----------|----------------------------------------------------------------------------------------------------------------------------------------------------------------------------------------------------|
| KCNH2<br>(ENSG00000055118) | KCNH2 (Q12809) | Protein Family                                                                                                                                                                                   | Amiodarone Hydrochloride   | Blocker        | Arrhythmias                                                                                                                                            |            |           |                                                                                                                                                                                                    |
|                            |                |                                                                                                                                                                                                  |                            | Blocker        | hyperthyroidism<br>hypotension<br>respiratory disorders<br>oedema<br>anaemia<br>hypertension<br>haemorrhage<br>cardiac conduction disorder<br>myopathy |            |           |                                                                                                                                                                                                    |
|                            |                |                                                                                                                                                                                                  | Sotalol Hydrochloride      | Blocker        | arrhythmia<br>bradycardia<br>chest pain<br>dyspnoea<br>oedema<br>palpitations<br>syncope                                                               |            |           |                                                                                                                                                                                                    |
|                            |                |                                                                                                                                                                                                  |                            | Blocker        | arrhythmia<br>asthma<br>palpitations<br>arrhythmia                                                                                                     |            |           |                                                                                                                                                                                                    |
|                            |                |                                                                                                                                                                                                  | KCNK3<br>(ENSG00000171303) | KCNK3 (O14649) | Single Protein                                                                                                                                         | Desflurane | Opener    | hypertension<br>hypotension<br>respiratory disorders<br>QT interval prolongation<br>cardiac arrest<br>haemorrhage<br>hypokalaemia<br>ventricular dysfunction<br>myocardial infarction<br>ischaemia |
|                            |                |                                                                                                                                                                                                  |                            |                |                                                                                                                                                        |            | Blocker   | Arrhythmias<br>chest discomfort<br>dyspnoea<br>respiratory disorders                                                                                                                               |
| Isoflurane                 | Opener         | arrhythmia<br>hypertension<br>hypotension<br>respiratory disorders<br>QT interval prolongation<br>cardiac arrest<br>chest discomfort<br>dyspnoea<br>haemorrhage                                  |                            |                |                                                                                                                                                        |            |           |                                                                                                                                                                                                    |
|                            | Opener         | arrhythmia<br>hypertension<br>hypotension<br>respiratory disorders<br>QT interval prolongation<br>cardiac arrest<br>haemorrhage<br>oedema<br>Asthma<br>atrioventricular block<br>angina pectoris |                            |                |                                                                                                                                                        |            |           |                                                                                                                                                                                                    |
| PDE5A<br>(ENSG00000138735) | PDE5A (O76074) | Single Protein                                                                                                                                                                                   |                            |                |                                                                                                                                                        | Avanafil   | Inhibitor | chest pain<br>hypertension<br>oedema<br>tachycardia<br>dyspnoea                                                                                                                                    |



**Table S8:** Cardiometabolic drug side-effects of compounds targeting proteins encoded by CMR genes (*continued*)

| Putative causal gene        | Protein        | Target type       | Compound                     | Drug mechanism | Drug side-effects                                                                                                                                                                                                             |
|-----------------------------|----------------|-------------------|------------------------------|----------------|-------------------------------------------------------------------------------------------------------------------------------------------------------------------------------------------------------------------------------|
|                             |                |                   | Tadalafil                    | Inhibitor      | palpitations<br>respiratory disorders<br>Acute coronary syndrome<br>oedema<br>cerebrovascular insufficiency<br>syncope<br>Arrhythmias<br>chest pain<br>dyspnoea<br>haemorrhage<br>hypertension<br>hypotension<br>palpitations |
|                             |                |                   | Dipyridamole                 | Inhibitor      | Angina pectoris<br>oedema<br>haemorrhage<br>hypotension<br>tachycardia                                                                                                                                                        |
|                             |                |                   | Pentoxifylline               | Inhibitor      | angina pectoris<br>oedema<br>arrhythmia<br>haemorrhage<br>hypotension                                                                                                                                                         |
| SCN10A<br>(ENSG00000185313) | SCNAA (Q9Y5Y9) | Protein<br>Family | Articaine Hydrochloride      | Blocker        | oedema                                                                                                                                                                                                                        |
|                             |                |                   | Carbamazepine                | Blocker        | hyponatraemia<br>oedema<br>anaemia<br>arrhythmia<br>cardiac conduction disorder<br>circulatory collapse<br>congestive heart failure<br>dyspnoea<br>embolism and thrombosis<br>coma<br>hypertension<br>hypotension<br>syncope  |
|                             |                |                   | Chloroprocaine Hydrochloride | Blocker        | hypotension<br>Cardiac arrest<br>dyspnoea<br>respiratory disorders<br>Arrhythmias<br>hypertension                                                                                                                             |
|                             |                |                   | Eslicarbazepine Acetate      | Blocker        | oedema<br>anaemia<br>bradycardia<br>chest pain<br>haemorrhage<br>hypertension<br>hypotension<br>palpitations                                                                                                                  |
|                             |                |                   | Fosphenytoin Sodium          | Blocker        | hypotension<br>atrioventricular block<br>bradycardia<br>cerebrovascular insufficiency<br>circulatory collapse<br>hyperglycaemia<br>respiratory disorders                                                                      |
|                             |                |                   | Lamotrigine                  | Blocker        | Cardiac arrest<br>oedema                                                                                                                                                                                                      |
|                             |                |                   | Lidocaine Hydrochloride      | Blocker        | multi organ failure<br>arrhythmia                                                                                                                                                                                             |

**Table S8:** Cardiometabolic drug side-effects of compounds targeting proteins encoded by CMR genes (*continued*)

| Putative causal gene | Protein | Target type | Compound                   | Drug mechanism | Drug side-effects                                                                                                            |
|----------------------|---------|-------------|----------------------------|----------------|------------------------------------------------------------------------------------------------------------------------------|
|                      |         |             |                            |                | atrioventricular block<br>cardiac arrest<br>circulatory collapse<br>hypotension<br>respiratory disorders                     |
|                      |         |             | Mepivacaine Hydrochloride  | Blocker        | Arrhythmias<br>hypertension<br>hypotension<br>cardiac arrest                                                                 |
|                      |         |             | Orphenadrine Hydrochloride | Blocker        | tachycardia                                                                                                                  |
|                      |         |             | Oxcarbazepine              | Blocker        | hyponatraemia<br>hypertension<br>oedema<br>arrhythmia                                                                        |
|                      |         |             | Phenytoin                  | Blocker        | atrioventricular block<br>arrhythmia<br>cardiac arrest<br>cerebrovascular insufficiency<br>hypotension<br>anaemia            |
|                      |         |             | Prilocaine Hydrochloride   | Blocker        | respiratory disorders<br>Arrhythmias<br>hypertension<br>hypotension                                                          |
|                      |         |             | Prilocaine                 | Blocker        | Cardiac arrest<br>cardiac arrest<br>hypotension                                                                              |
|                      |         |             | Primidone                  | Blocker        | anaemia                                                                                                                      |
|                      |         |             | Propafenone Hydrochloride  | Blocker        | arrhythmia<br>cardiac conduction disorder<br>chest pain<br>dyspnoea<br>palpitations<br>hypotension<br>syncope                |
|                      |         |             | Riluzole                   | Blocker        | tachycardia<br>Anaemia<br>oedema<br>interstitial lung disease                                                                |
|                      |         |             | Ropivacaine Hydrochloride  | Blocker        | Arrhythmias<br>hypertension<br>hypotension<br>Cardiac arrest<br>dyspnoea<br>syncope                                          |
|                      |         |             | Tetracaine                 | Blocker        | oedema                                                                                                                       |
|                      |         |             | Topiramate                 | Blocker        | anaemia<br>dyspnoea<br>haemorrhage<br>oedema<br>coma<br>arrhythmia<br>hypokalaemia<br>hypotension<br>palpitations<br>syncope |
|                      |         |             | Lidocaine                  | Blocker        | hypertension                                                                                                                 |
|                      |         |             | Zonisamide                 | Blocker        | oedema<br>coma<br>dyspnoea<br>stroke<br>hypokalaemia                                                                         |

**Table S8:** Cardiometabolic drug side-effects of compounds targeting proteins encoded by CMR genes (*continued*)

| Putative causal gene | Protein | Target type | Compound | Drug mechanism | Drug side-effects     |
|----------------------|---------|-------------|----------|----------------|-----------------------|
|                      |         |             |          |                | respiratory disorders |

*General:*  
Data were extracted from British National Formulary, and ChEMBL. Genes are provided with ensembl id, and proteins with uniprot id.

**Table S9:** Drugged CMR proteins: BNF, ChEMBL and HPA annotations.

| Protein (UniProt) | Compound                                                                                                                                         | Drug type          | Target type                 | Drug action           | Curated indications                                                                                                                                                                                                                                                                      | Curated side effects                                                                                                         | mRNA Tissue specificity | Above average mRNA expression                      |
|-------------------|--------------------------------------------------------------------------------------------------------------------------------------------------|--------------------|-----------------------------|-----------------------|------------------------------------------------------------------------------------------------------------------------------------------------------------------------------------------------------------------------------------------------------------------------------------------|------------------------------------------------------------------------------------------------------------------------------|-------------------------|----------------------------------------------------|
| AT1B2 (P14415)    | Deslanoside, Digitoxin, Acetyldigitoxin                                                                                                          | Small_Mol          | Protein Complex Group       | Inhibitor             | Heart failure (for patients in sinus rhythm); Maintenance, for atrial fibrillation or flutter; Angioedemas, Hereditary; Atrial Fibrillation; Cardiovascular Diseases; Diabetes Mellitus; Diabetes Mellitus, Type 2; Essential Hypertension; Heart Failure; Tachycardia, Supraventricular | Arrhythmias; cardiac conduction disorder                                                                                     | 0.914                   | Cerebral cortex, Pons and medulla                  |
| CAH6 (P23280)     | Ethoxzolamide                                                                                                                                    | Bio_Mol, Small_Mol | Protein Family              | Inhibitor             |                                                                                                                                                                                                                                                                                          |                                                                                                                              | 0.999                   | Salivary gland                                     |
| CD33 (P20138)     | Gemtuzumab Ozogamicin, Lintuzumab, M195, Oncolysin M, Gemtuzumab, Ave-9633                                                                       | Bio_Mol            | Single Protein              | Binding Agent, Other  |                                                                                                                                                                                                                                                                                          | Anaemia; ascites; dyspnoea; haemorrhage; hyperglycaemia; hypertension; hypotension; multi organ failure; oedema; tachycardia | 0.880                   | Dendritic cells, Lymph node, Monocytes, Spleen     |
| CHLE (P06276)     | Propanidid                                                                                                                                       | Bio_Mol, Small_Mol | Single Protein              | Inhibitor             |                                                                                                                                                                                                                                                                                          |                                                                                                                              | 0.965                   | Liver                                              |
| CHLE (P06276)     | Rivastigmine Tartrate, Rivastigmine, Tacrine Hydrochloride                                                                                       | Bio_Mol, Small_Mol | Selectivity Group           | Inhibitor             | Hypotension, Orthostatic                                                                                                                                                                                                                                                                 | angina pectoris; arrhythmias; atrioventricular block; hypertension; hypotension; syncope                                     | 0.965                   | Liver                                              |
| CO6A1 (P12109)    | Collagenase Clostridium Histolyticum, Ocriplasmin                                                                                                | Bio_Mol            | Protein Complex Group       | Hydrolytic Enzyme     | Stroke; Venous Thrombosis                                                                                                                                                                                                                                                                | haemorrhage                                                                                                                  | 0.801                   | Cervix, uterine, Colon, Endometrium, Smooth muscle |
| COFA1 (P39059)    | Collagenase Clostridium Histolyticum, Ocriplasmin                                                                                                | Bio_Mol            | Protein Complex Group       | Hydrolytic Enzyme     | Stroke; Venous Thrombosis                                                                                                                                                                                                                                                                | haemorrhage                                                                                                                  | 0.842                   | Endometrium, Heart muscle, Placenta                |
| EPHA1 (P21709)    | Vandetanib                                                                                                                                       | Small_Mol          | Protein Family              | Inhibitor             |                                                                                                                                                                                                                                                                                          |                                                                                                                              | 0.967                   | Parathyroid gland                                  |
| EPHB6 (O15197)    | Vandetanib                                                                                                                                       | Bio_Mol, Small_Mol | Protein Family              | Inhibitor             |                                                                                                                                                                                                                                                                                          |                                                                                                                              | 0.852                   | Basal ganglia, Cerebral cortex, Skin, Thymus       |
| FGFR3 (P22607)    | Pazopanib Hydrochloride, Enmd-2076, Masitinib, Dovitinib, Rg-7444                                                                                | Bio_Mol, Small_Mol | Single Protein              | Inhibitor             | Asthma                                                                                                                                                                                                                                                                                   |                                                                                                                              | 0.946                   | Skin                                               |
| FGFR3 (P22607)    | Nintedanib Esylate, Enmd-981693, Arq-087, Bay-1163877, Cp-459632, Ly-2874455, Azd-4547, Xl-999, Bgj-398, Brivanib, Brivanib Alaninate, Orantinib | Bio_Mol, Small_Mol | Protein Family              | Inhibitor             |                                                                                                                                                                                                                                                                                          |                                                                                                                              | 0.946                   | Skin                                               |
| IL7RA (Q96F46)    | Brodalumab                                                                                                                                       | Bio_Mol            | Single Protein              | Antagonist            | Asthma                                                                                                                                                                                                                                                                                   |                                                                                                                              | 0.816                   | Bone marrow, Lymph node, Thymus                    |
| IL12B (P29460)    | Ustekinumab, Briakinumab                                                                                                                         | Bio_Mol            | Protein Complex             | Inhibitor             | Diabetes Mellitus, Type 1; Sarcoidosis                                                                                                                                                                                                                                                   | Respiratory disorders                                                                                                        | 0.952                   | Thymus                                             |
| IL12B (P29460)    | Briakinumab                                                                                                                                      | Bio_Mol            | Single Protein              | Inhibitor             |                                                                                                                                                                                                                                                                                          |                                                                                                                              | 0.952                   | Thymus                                             |
| IL6RA (P08887)    | Satralizumab                                                                                                                                     | Bio_Mol            | Protein-Protein Interaction | Antagonist            |                                                                                                                                                                                                                                                                                          |                                                                                                                              | 0.873                   | Granulocytes, Liver, Skeletal muscle               |
| IL6RA (P08887)    | Tocilizumab, Sarilumab, Vobarilizumab                                                                                                            | Bio_Mol            | Single Protein              | Inhibitor, Antagonist | Diabetes Mellitus, Type 1; Hypertension, Pulmonary; Non-ST Elevated Myocardial Infarction; Pneumonia; Pneumonia, Viral                                                                                                                                                                   | Dyslipidaemia; dyslipidaemia; dyspnoea; hypertension; interstitial lung disease                                              | 0.873                   | Granulocytes, Liver, Skeletal muscle               |
| LAMC2 (Q13753)    | Ocriplasmin                                                                                                                                      | Bio_Mol            | Protein Complex Group       | Hydrolytic Enzyme     | Stroke; Venous Thrombosis                                                                                                                                                                                                                                                                | haemorrhage                                                                                                                  | 0.776                   | Appendix, Fallopian tube, Lung, Placenta           |
| PTGDS (P41222)    | Antrafenine                                                                                                                                      | Bio_Mol            | Single Protein              | Inhibitor             |                                                                                                                                                                                                                                                                                          |                                                                                                                              | 0.806                   | Cervix, uterine, Heart muscle, Retina              |

**Table S9:** Drugged CMR proteins: BNF, ChEMBL and HPA annotations. (continued)

| Protein (UniProt) | Compound                                                                                                                                                                                                                                                                                                                                                                                                                                                                                                 | Drug type          | Target type    | Drug action | Curated indications                    | Curated side effects                                                                                                                                                                                                                                                                                                                                   | mRNA Tissue specificity | Above average mRNA expression                      |
|-------------------|----------------------------------------------------------------------------------------------------------------------------------------------------------------------------------------------------------------------------------------------------------------------------------------------------------------------------------------------------------------------------------------------------------------------------------------------------------------------------------------------------------|--------------------|----------------|-------------|----------------------------------------|--------------------------------------------------------------------------------------------------------------------------------------------------------------------------------------------------------------------------------------------------------------------------------------------------------------------------------------------------------|-------------------------|----------------------------------------------------|
| RENI (P00797)     | Aliskiren Fumarate                                                                                                                                                                                                                                                                                                                                                                                                                                                                                       | Bio_Mol, Small_Mol | Single Protein | Inhibitor   | Hypertension                           |                                                                                                                                                                                                                                                                                                                                                        | 0.983                   | Kidney                                             |
| SLAF7 (Q9NQ25)    | Elotuzumab                                                                                                                                                                                                                                                                                                                                                                                                                                                                                               | Bio_Mol            | Single Protein | Inhibitor   | Amyloidosis, Familial                  | Chest pain                                                                                                                                                                                                                                                                                                                                             | 0.859                   | Appendix, Dendritic cells, Spleen, T-cells, Tonsil |
| TIE2 (Q02763)     | Regorafenib, Vandetanib, Pexmetinib, Ce-245677, Cep-11981, Altiratinib, Foretinib, Mgcd-265                                                                                                                                                                                                                                                                                                                                                                                                              | Bio_Mol, Small_Mol | Single Protein | Inhibitor   | Pulmonary Disease, Chronic Obstructive | ; Aneurysm; anaemia; artery dissection; hypertension; myocardial infarction; myocardial ischaemia; pain                                                                                                                                                                                                                                                | 0.808                   | Adipose tissue, Kidney, Lung, Placenta, Spleen     |
| VGFR3 (P35916)    | Jnj-26483327, Anlotinib, Telatinib, Famitinib, Imc-3C5                                                                                                                                                                                                                                                                                                                                                                                                                                                   | Bio_Mol, Small_Mol | Single Protein | Inhibitor   |                                        |                                                                                                                                                                                                                                                                                                                                                        | 0.903                   | Breast, Lymph node, Placenta                       |
| VGFR3 (P35916)    | Sunitinib Malate, Axitinib, Vandetanib, Sorafenib Tosylate, Pazopanib Hydrochloride, Regorafenib, Nintedanib Esylate, Lenvatinib Mesylate, Su-14813, Su-014813, 4Sc-203, Ilorasertib, Cep-11981, Cep-5214, Cep-7055, Cp-459632, Chiauranib, Sulfatinib, Krn-633, L-21649, Osi-930, Tak-593, Rg-1530, Ag-13958, Bms-690514, Lucitanib, Foretinib, Fruquintinib, Mgcd-265, X-82, Xi-820, Xi-999, Linifanib, Cediranib, Brivanib, Brivanib Alaninate, Tivozanib, Vatalanib, Semaxanib, Dovitinib, Motesanib | Bio_Mol, Small_Mol | Protein Family | Inhibitor   | Pulmonary Disease, Chronic Obstructive | ; Aneurysm; Coronary artery insufficiency; QT interval prolongation; anaemia; angina pectoris; arrhythmias; artery dissection; cerebrovascular insufficiency; chest pain; dyspnoea; embolism and thrombosis; haemorrhage; heart failure; hypertension; hyperthyroidism; ischaemia; myocardial infarction; myocardial ischaemia; pain; pulmonary oedema | 0.903                   | Breast, Lymph node, Placenta                       |

*General:*  
Data were extracted from British National Formulary, ChEMBL, Human Protein Atlas. Indications and side effects were curated for cardiovascular relevant traits. Tissues with above average mRNA expression were selected based on a z-statistic of at least 1.96. Tissue specificity ranges between 0 (ubiquitous expressed) and 1 (specifically expressed).

**Table S10:** CMR drugged proteins: MR effect estimates of plasma protein effects on sixteen CMR traits.

| Protein (uniprot) | Gene (ensembl)           | CMR trait        | MD (95%CI)            | P-value                | Multiple testing threshold | Q P-value | No. variants | MR model | PDTL source |
|-------------------|--------------------------|------------------|-----------------------|------------------------|----------------------------|-----------|--------------|----------|-------------|
| IL6RA (P08887)    | IL6R (ENSG00000160712)   | RV - SV (ml)     | -0.68 (-0.84; -0.51)  | 4.4×10 <sup>-16</sup>  | 7.81×10 <sup>-6</sup>      | 0.091     | 72           | MR Egger | Scallop     |
|                   |                          | RV - PFR (ml/s)  | -2.79 (-3.55; -2.04)  | 3.8×10 <sup>-13</sup>  |                            | 0.017     | 74           | MR Egger |             |
|                   |                          | RV - PER (ml/s)  | -2.26 (-3.12; -1.40)  | 2.8×10 <sup>-7</sup>   |                            | 0.029     | 70           | MR Egger |             |
|                   |                          | RV - PAFR (ml/s) | 1.18 (0.82; 1.53)     | 1.1×10 <sup>-10</sup>  |                            | 0.043     | 77           | IWV      |             |
|                   |                          | RV - ESV (ml)    | -0.47 (-0.62; -0.32)  | 6.7×10 <sup>-10</sup>  |                            | 0.008     | 76           | MR Egger |             |
|                   |                          | RV - EF (%)      | 0.01 (-0.04; 0.07)    | 6.1×10 <sup>-1</sup>   |                            | 0.018     | 77           | MR Egger |             |
|                   |                          | RV - EDV (ml)    | -1.19 (-1.43; -0.94)  | 1.0×10 <sup>-100</sup> |                            | 0.039     | 73           | MR Egger |             |
|                   |                          | LV - SV (ml)     | 0.05 (-0.02; 0.11)    | 1.4×10 <sup>-1</sup>   |                            | 0.027     | 67           | IWV      |             |
|                   |                          | LV - PFR (ml/s)  | -3.32 (-4.22; -2.42)  | 4.9×10 <sup>-13</sup>  |                            | 0.024     | 73           | MR Egger |             |
|                   |                          | LV - PER (ml/s)  | -1.50 (-2.37; -0.62)  | 7.6×10 <sup>-4</sup>   |                            | 0.045     | 74           | MR Egger |             |
|                   |                          | LV - PAFR (ml/s) | 0.80 (0.40; 1.20)     | 9.2×10 <sup>-5</sup>   |                            | 0.407     | 73           | IWV      |             |
|                   |                          | LV - MVR (g/ml)  | 0.00 (0.00; 0.00)     | 9.5×10 <sup>-10</sup>  |                            | 0.003     | 72           | MR Egger |             |
|                   |                          | LV - ESV (ml)    | -0.71 (-0.85; -0.57)  | 1.0×10 <sup>-100</sup> |                            | 0.009     | 72           | MR Egger |             |
|                   |                          | LV - EF (%)      | 0.01 (-0.01; 0.04)    | 3.5×10 <sup>-1</sup>   |                            | 0.264     | 75           | IWV      |             |
|                   |                          | LV - EDV (ml)    | 0.03 (-0.06; 0.13)    | 5.1×10 <sup>-1</sup>   |                            | 0.002     | 68           | IWV      |             |
|                   |                          | LV - EDM (g)     | -0.31 (-0.49; -0.14)  | 4.6×10 <sup>-4</sup>   |                            | <0.001    | 72           | MR Egger |             |
| PTGDS (P41222)    | PTGDS (ENSG00000107317)  | RV - SV (ml)     | 1.18 (0.60; 1.76)     | 6.8×10 <sup>-5</sup>   | 7.81×10 <sup>-6</sup>      | 0.424     | 6            | IWV      | Interval    |
|                   |                          | RV - PFR (ml/s)  | -0.41 (-3.52; 2.71)   | 8.0×10 <sup>-1</sup>   |                            | 0.744     | 6            | IWV      |             |
|                   |                          | RV - PER (ml/s)  | 1.92 (-2.34; 6.17)    | 3.8×10 <sup>-1</sup>   |                            | 0.125     | 6            | IWV      |             |
|                   |                          | RV - PAFR (ml/s) | 9.24 (5.56; 12.92)    | 8.5×10 <sup>-7</sup>   |                            | 0.988     | 6            | IWV      |             |
|                   |                          | RV - ESV (ml)    | -2.00 (-5.39; 1.39)   | 2.5×10 <sup>-1</sup>   |                            | 0.943     | 6            | MR Egger |             |
|                   |                          | RV - EF (%)      | 0.10 (-0.12; 0.33)    | 3.7×10 <sup>-1</sup>   |                            | 0.550     | 6            | IWV      |             |
|                   |                          | RV - EDV (ml)    | 1.93 (0.92; 2.94)     | 1.9×10 <sup>-4</sup>   |                            | 0.358     | 6            | IWV      |             |
|                   |                          | LV - SV (ml)     | 2.29 (1.70; 2.89)     | 4.0×10 <sup>-14</sup>  |                            | 0.792     | 6            | IWV      |             |
|                   |                          | LV - PFR (ml/s)  | -5.25 (-25.53; 15.02) | 6.1×10 <sup>-1</sup>   |                            | 0.743     | 6            | MR Egger |             |
|                   |                          | LV - PER (ml/s)  | -12.44 (-32.84; 7.96) | 2.3×10 <sup>-1</sup>   |                            | 0.898     | 5            | MR Egger |             |
|                   |                          | LV - PAFR (ml/s) | 7.22 (2.56; 11.88)    | 2.4×10 <sup>-3</sup>   |                            | 0.751     | 5            | IWV      |             |
|                   |                          | LV - MVR (g/ml)  | 0.00 (-0.00; 0.00)    | 5.3×10 <sup>-1</sup>   |                            | 0.858     | 6            | IWV      |             |
|                   |                          | LV - ESV (ml)    | 0.10 (-0.45; 0.66)    | 7.2×10 <sup>-1</sup>   |                            | 0.490     | 6            | IWV      |             |
|                   |                          | LV - EF (%)      | 0.71 (0.42; 0.99)     | 9.0×10 <sup>-7</sup>   |                            | 0.177     | 6            | IWV      |             |
|                   |                          | LV - EDV (ml)    | 2.29 (1.34; 3.23)     | 2.1×10 <sup>-6</sup>   |                            | 0.674     | 6            | IWV      |             |
|                   |                          | LV - EDM (g)     | 1.36 (0.85; 1.88)     | 2.3×10 <sup>-7</sup>   |                            | 0.511     | 6            | IWV      |             |
| IL17RA (Q96F46)   | IL17RA (ENSG00000177663) | RV - SV (ml)     | 0.17 (0.07; 0.26)     | 8.2×10 <sup>-4</sup>   | 7.81×10 <sup>-6</sup>      | 0.007     | 45           | IWV      | Interval    |
|                   |                          | RV - PFR (ml/s)  | 0.53 (0.04; 1.02)     | 3.4×10 <sup>-2</sup>   |                            | <0.001    | 47           | IWV      |             |
|                   |                          | RV - PER (ml/s)  | 0.21 (-0.25; 0.68)    | 3.6×10 <sup>-1</sup>   |                            | <0.001    | 43           | IWV      |             |
|                   |                          | RV - PAFR (ml/s) | 1.32 (0.81; 1.84)     | 4.4×10 <sup>-7</sup>   |                            | 0.014     | 45           | IWV      |             |
|                   |                          | RV - ESV (ml)    | 0.11 (0.02; 0.20)     | 1.7×10 <sup>-2</sup>   |                            | 0.135     | 47           | IWV      |             |
|                   |                          | RV - EF (%)      | 0.05 (0.01; 0.08)     | 1.2×10 <sup>-2</sup>   |                            | 0.081     | 48           | IWV      |             |
|                   |                          | RV - EDV (ml)    | 0.40 (0.26; 0.53)     | 5.8×10 <sup>-9</sup>   |                            | <0.001    | 47           | IWV      |             |
|                   |                          | LV - SV (ml)     | 0.02 (-0.06; 0.11)    | 5.6×10 <sup>-1</sup>   |                            | <0.001    | 46           | IWV      |             |
|                   |                          | LV - PFR (ml/s)  | 0.20 (-0.73; 1.13)    | 6.8×10 <sup>-1</sup>   |                            | 0.035     | 48           | MR Egger |             |
|                   |                          | LV - PER (ml/s)  | -0.49 (-0.97; -0.01)  | 4.8×10 <sup>-2</sup>   |                            | <0.001    | 47           | IWV      |             |
|                   |                          | LV - PAFR (ml/s) | 0.38 (-0.27; 1.03)    | 2.5×10 <sup>-1</sup>   |                            | <0.001    | 44           | IWV      |             |
|                   |                          | LV - MVR (g/ml)  | -0.00 (-0.00; -0.00)  | 2.1×10 <sup>-4</sup>   |                            | 0.033     | 47           | MR Egger |             |
|                   |                          | LV - ESV (ml)    | -0.21 (-0.28; -0.13)  | 1.8×10 <sup>-7</sup>   |                            | 0.610     | 46           | IWV      |             |
|                   |                          | LV - EF (%)      | 0.09 (0.06; 0.13)     | 1.3×10 <sup>-7</sup>   |                            | 0.203     | 47           | IWV      |             |
|                   |                          | LV - EDV (ml)    | -0.17 (-0.30; -0.03)  | 1.4×10 <sup>-2</sup>   |                            | 0.011     | 47           | IWV      |             |
|                   |                          | LV - EDM (g)     | -0.34 (-0.41; -0.27)  | 1.0×10 <sup>-100</sup> |                            | 0.032     | 45           | IWV      |             |
| TIE2 (Q02763)     | TEK (ENSG00000120156)    | RV - SV (ml)     | 0.02 (-0.35; 0.39)    | 9.1×10 <sup>-1</sup>   | 7.81×10 <sup>-6</sup>      | <0.001    | 52           | MR Egger | Scallop     |
|                   |                          | RV - PFR (ml/s)  | -2.80 (-5.15; -0.46)  | 1.9×10 <sup>-2</sup>   |                            | 0.018     | 49           | MR Egger |             |
|                   |                          | RV - PER (ml/s)  | 0.22 (-2.02; 2.46)    | 8.5×10 <sup>-1</sup>   |                            | <0.001    | 47           | MR Egger |             |
|                   |                          | RV - PAFR (ml/s) | 5.47 (4.15; 6.79)     | 4.4×10 <sup>-16</sup>  |                            | <0.001    | 54           | IWV      |             |
|                   |                          | RV - ESV (ml)    | -0.68 (-0.89; -0.48)  | 4.1×10 <sup>-11</sup>  |                            | <0.001    | 48           | IWV      |             |
|                   |                          | RV - EF (%)      | -0.03 (-0.15; 0.10)   | 6.8×10 <sup>-1</sup>   |                            | 0.015     | 53           | MR Egger |             |
|                   |                          | RV - EDV (ml)    | -0.02 (-0.56; 0.52)   | 9.4×10 <sup>-1</sup>   |                            | <0.001    | 55           | MR Egger |             |
|                   |                          | LV - SV (ml)     | 0.23 (-0.16; 0.62)    | 2.4×10 <sup>-1</sup>   |                            | <0.001    | 48           | MR Egger |             |
|                   |                          | LV - PFR (ml/s)  | -0.48 (-2.45; 1.49)   | 6.3×10 <sup>-1</sup>   |                            | <0.001    | 52           | MR Egger |             |
|                   |                          | LV - PER (ml/s)  | -0.12 (-2.54; 2.30)   | 9.2×10 <sup>-1</sup>   |                            | <0.001    | 48           | MR Egger |             |
|                   |                          | LV - PAFR (ml/s) | 1.81 (0.57; 3.05)     | 4.2×10 <sup>-3</sup>   |                            | <0.001    | 55           | IWV      |             |
|                   |                          | LV - MVR (g/ml)  | -0.00 (-0.00; -0.00)  | 4.6×10 <sup>-2</sup>   |                            | 0.011     | 52           | MR Egger |             |
|                   |                          | LV - ESV (ml)    | -0.34 (-0.74; 0.06)   | 9.4×10 <sup>-2</sup>   |                            | <0.001    | 44           | MR Egger |             |
|                   |                          | LV - EF (%)      | 0.43 (0.32; 0.55)     | 8.9×10 <sup>-13</sup>  |                            | <0.001    | 49           | MR Egger |             |
|                   |                          | LV - EDV (ml)    | 0.20 (-0.50; 0.90)    | 5.7×10 <sup>-1</sup>   |                            | 0.013     | 50           | MR Egger |             |

**Table S10:** CMR drugged proteins: MR effect estimates of plasma protein effects on sixteen CMR traits. (*continued*)

| Protein (uniprot) | Gene (ensembl)           | CMR trait            | MD (95%CI)            | P-value                | Multiple testing threshold | Q P-value | No. variants | MR model | PQTL source |
|-------------------|--------------------------|----------------------|-----------------------|------------------------|----------------------------|-----------|--------------|----------|-------------|
| EPHA1 (P21709)    | EPHA1 (ENSG00000146904)  | LV - EDM (g)         | -0.14 (-0.53; 0.25)   | 4.7×10 <sup>-1</sup>   |                            | <0.001    | 46           | MR Egger |             |
|                   |                          | RV - SV (ml)         | -0.04 (-0.66; 0.57)   | 8.9×10 <sup>-1</sup>   | 7.81×10 <sup>-6</sup>      | 0.616     | 16           | MR Egger | Interval    |
|                   |                          | RV - PFR (ml/s)      | 0.58 (-2.72; 3.89)    | 7.3×10 <sup>-1</sup>   |                            | 0.591     | 16           | MR Egger |             |
|                   |                          | RV - PER (ml/s)      | -1.26 (-4.70; 2.18)   | 4.7×10 <sup>-1</sup>   |                            | 0.553     | 16           | MR Egger |             |
|                   |                          | RV - PAFR (ml/s)     | 3.38 (1.59; 5.18)     | 2.3×10 <sup>-4</sup>   |                            | 0.099     | 17           | IWW      |             |
|                   |                          | RV - ESV (ml)        | -0.71 (-1.42; 0.00)   | 5.1×10 <sup>-2</sup>   |                            | 0.239     | 14           | MR Egger |             |
|                   |                          | RV - EF (%)          | 0.42 (0.30; 0.53)     | 1.3×10 <sup>-12</sup>  |                            | 0.167     | 16           | IWW      |             |
|                   |                          | RV - EDV (ml)        | -0.82 (-1.20; -0.43)  | 3.7×10 <sup>-5</sup>   |                            | 0.543     | 17           | IWW      |             |
|                   |                          | LV - SV (ml)         | 0.23 (-0.01; 0.47)    | 5.8×10 <sup>-2</sup>   |                            | 0.039     | 17           | IWW      |             |
|                   |                          | LV - PFR (ml/s)      | -1.46 (-6.24; 3.33)   | 5.5×10 <sup>-1</sup>   |                            | 0.069     | 16           | MR Egger |             |
|                   |                          | LV - PER (ml/s)      | -2.31 (-6.02; 1.40)   | 2.2×10 <sup>-1</sup>   |                            | 0.027     | 16           | MR Egger |             |
|                   |                          | LV - PAFR (ml/s)     | 1.00 (-0.56; 2.56)    | 2.1×10 <sup>-1</sup>   |                            | 0.451     | 17           | IWW      |             |
|                   |                          | LV - MVR (g/ml)      | 0.00 (-0.00; 0.00)    | 5.1×10 <sup>-1</sup>   |                            | 0.005     | 17           | IWW      |             |
|                   |                          | LV - ESV (ml)        | -0.71 (-0.96; -0.45)  | 3.3×10 <sup>-8</sup>   |                            | 0.217     | 17           | IWW      |             |
|                   |                          | LV - EF (%)          | 0.34 (0.24; 0.43)     | 6.0×10 <sup>-13</sup>  |                            | 0.042     | 17           | IWW      |             |
|                   |                          | LV - EDV (ml)        | -0.49 (-0.89; -0.09)  | 1.7×10 <sup>-2</sup>   |                            | 0.335     | 17           | IWW      |             |
| LV - EDM (g)      | -0.16 (-0.41; 0.08)      | 1.9×10 <sup>-1</sup> |                       | 0.148                  | 17                         | IWW       |              |          |             |
| CO6A1 (P12109)    | COL6A1 (ENSG00000142156) | RV - SV (ml)         | 1.29 (0.06; 2.53)     | 4.0×10 <sup>-2</sup>   | 7.81×10 <sup>-6</sup>      | 0.344     | 20           | MR Egger | Interval    |
|                   |                          | RV - PFR (ml/s)      | 6.19 (-0.35; 12.73)   | 6.4×10 <sup>-2</sup>   |                            | 0.364     | 21           | MR Egger |             |
|                   |                          | RV - PER (ml/s)      | 6.10 (4.51; 7.68)     | 4.2×10 <sup>-14</sup>  |                            | 0.003     | 19           | IWW      |             |
|                   |                          | RV - PAFR (ml/s)     | -6.11 (-13.82; 1.60)  | 1.2×10 <sup>-1</sup>   |                            | 0.379     | 20           | MR Egger |             |
|                   |                          | RV - ESV (ml)        | 1.30 (-0.14; 2.74)    | 7.6×10 <sup>-2</sup>   |                            | 0.104     | 21           | MR Egger |             |
|                   |                          | RV - EF (%)          | -0.07 (-0.56; 0.41)   | 7.7×10 <sup>-1</sup>   |                            | 0.329     | 20           | MR Egger |             |
|                   |                          | RV - EDV (ml)        | 2.95 (1.00; 4.90)     | 3.1×10 <sup>-3</sup>   |                            | 0.759     | 21           | MR Egger |             |
|                   |                          | LV - SV (ml)         | -0.08 (-1.28; 1.12)   | 9.0×10 <sup>-1</sup>   |                            | 0.019     | 21           | MR Egger |             |
|                   |                          | LV - PFR (ml/s)      | -1.20 (-10.61; 8.21)  | 8.0×10 <sup>-1</sup>   |                            | 0.097     | 19           | MR Egger |             |
|                   |                          | LV - PER (ml/s)      | -0.45 (-7.84; 6.93)   | 9.0×10 <sup>-1</sup>   |                            | 0.641     | 19           | MR Egger |             |
|                   |                          | LV - PAFR (ml/s)     | -8.60 (-16.66; -0.54) | 3.7×10 <sup>-2</sup>   |                            | 0.012     | 19           | MR Egger |             |
|                   |                          | LV - MVR (g/ml)      | 0.01 (0.01; 0.01)     | 7.9×10 <sup>-12</sup>  |                            | 0.056     | 19           | IWW      |             |
|                   |                          | LV - ESV (ml)        | 1.13 (-0.02; 2.29)    | 5.5×10 <sup>-2</sup>   |                            | 0.390     | 21           | MR Egger |             |
|                   |                          | LV - EF (%)          | -0.30 (-0.42; -0.18)  | 1.6×10 <sup>-6</sup>   |                            | 0.002     | 18           | IWW      |             |
|                   |                          | LV - EDV (ml)        | 0.95 (-0.97; 2.86)    | 3.3×10 <sup>-1</sup>   |                            | 0.872     | 21           | MR Egger |             |
|                   |                          | LV - EDM (g)         | 1.10 (-0.07; 2.27)    | 6.6×10 <sup>-2</sup>   |                            | 0.211     | 20           | MR Egger |             |
| CHLE (P06276)     | BCHE (ENSG00000114200)   | RV - SV (ml)         | -0.16 (-0.69; 0.36)   | 5.4×10 <sup>-1</sup>   | 7.81×10 <sup>-6</sup>      | 0.883     | 17           | MR Egger | Framingham  |
|                   |                          | RV - PFR (ml/s)      | -0.25 (-0.57; 0.06)   | 1.1×10 <sup>-1</sup>   |                            | 0.038     | 24           | IWW      |             |
|                   |                          | RV - PER (ml/s)      | 1.67 (-2.65; 5.98)    | 4.5×10 <sup>-1</sup>   |                            | 0.218     | 12           | MR Egger |             |
|                   |                          | RV - PAFR (ml/s)     | -1.33 (-1.78; -0.88)  | 6.3×10 <sup>-9</sup>   |                            | 0.519     | 24           | IWW      |             |
|                   |                          | RV - ESV (ml)        | -0.80 (-1.18; -0.42)  | 4.1×10 <sup>-5</sup>   |                            | 0.002     | 20           | MR Egger |             |
|                   |                          | RV - EF (%)          | 0.04 (-0.03; 0.11)    | 3.0×10 <sup>-1</sup>   |                            | 0.024     | 20           | IWW      |             |
|                   |                          | RV - EDV (ml)        | 0.42 (0.33; 0.52)     | 1.0×10 <sup>-100</sup> |                            | <0.001    | 23           | IWW      |             |
|                   |                          | LV - SV (ml)         | -0.72 (-1.53; 0.10)   | 8.6×10 <sup>-2</sup>   |                            | 0.150     | 15           | MR Egger |             |
|                   |                          | LV - PFR (ml/s)      | -0.37 (-0.72; -0.03)  | 3.6×10 <sup>-2</sup>   |                            | 0.677     | 26           | IWW      |             |
|                   |                          | LV - PER (ml/s)      | -2.42 (-8.59; 3.74)   | 4.4×10 <sup>-1</sup>   |                            | 0.990     | 8            | MR Egger |             |
|                   |                          | LV - PAFR (ml/s)     | -4.03 (-5.67; -2.38)  | 1.6×10 <sup>-6</sup>   |                            | 0.347     | 17           | IWW      |             |
|                   |                          | LV - MVR (g/ml)      | 0.00 (-0.00; 0.00)    | 5.3×10 <sup>-1</sup>   |                            | 0.278     | 26           | IWW      |             |
|                   |                          | LV - ESV (ml)        | -0.47 (-1.28; 0.33)   | 2.5×10 <sup>-1</sup>   |                            | 0.495     | 11           | MR Egger |             |
|                   |                          | LV - EF (%)          | -0.20 (-0.37; -0.03)  | 2.2×10 <sup>-2</sup>   |                            | 0.025     | 20           | MR Egger |             |
|                   |                          | LV - EDV (ml)        | -1.19 (-2.78; 0.40)   | 1.4×10 <sup>-1</sup>   |                            | 0.853     | 10           | MR Egger |             |
|                   |                          | LV - EDM (g)         | -0.58 (-1.63; 0.47)   | 2.8×10 <sup>-1</sup>   |                            | 0.907     | 7            | MR Egger |             |
| SLAF7 (Q9NQ25)    | SLAMF7 (ENSG00000026751) | RV - SV (ml)         | 0.29 (0.11; 0.47)     | 1.9×10 <sup>-3</sup>   | 7.81×10 <sup>-6</sup>      | 0.888     | 30           | MR Egger | Interval    |
|                   |                          | RV - PFR (ml/s)      | 1.87 (0.71; 3.04)     | 1.6×10 <sup>-3</sup>   |                            | 0.084     | 30           | MR Egger |             |
|                   |                          | RV - PER (ml/s)      | 0.61 (-0.53; 1.75)    | 2.9×10 <sup>-1</sup>   |                            | 0.225     | 29           | MR Egger |             |
|                   |                          | RV - PAFR (ml/s)     | 2.26 (1.60; 2.91)     | 1.5×10 <sup>-11</sup>  |                            | 0.858     | 29           | IWW      |             |
|                   |                          | RV - ESV (ml)        | -0.22 (-0.32; -0.12)  | 1.6×10 <sup>-5</sup>   |                            | 0.035     | 29           | IWW      |             |
|                   |                          | RV - EF (%)          | 0.12 (0.08; 0.17)     | 4.3×10 <sup>-8</sup>   |                            | 0.089     | 30           | IWW      |             |
|                   |                          | RV - EDV (ml)        | -0.19 (-0.37; 0.00)   | 5.5×10 <sup>-2</sup>   |                            | 0.124     | 28           | IWW      |             |
|                   |                          | LV - SV (ml)         | 0.07 (-0.13; 0.26)    | 4.8×10 <sup>-1</sup>   |                            | 0.368     | 30           | MR Egger |             |
|                   |                          | LV - PFR (ml/s)      | 1.59 (0.45; 2.74)     | 6.5×10 <sup>-3</sup>   |                            | 0.833     | 30           | MR Egger |             |
|                   |                          | LV - PER (ml/s)      | 1.23 (0.41; 2.05)     | 3.2×10 <sup>-3</sup>   |                            | 0.128     | 27           | IWW      |             |
|                   |                          | LV - PAFR (ml/s)     | 0.34 (-0.91; 1.60)    | 5.9×10 <sup>-1</sup>   |                            | 0.785     | 29           | MR Egger |             |
|                   |                          | LV - MVR (g/ml)      | 0.00 (-0.00; 0.00)    | 4.0×10 <sup>-1</sup>   |                            | 0.244     | 28           | IWW      |             |
|                   |                          | LV - ESV (ml)        | -0.00 (-0.19; 0.19)   | 1.0×10 <sup>0</sup>    |                            | 0.309     | 30           | MR Egger |             |

**Table S10:** CMR drugged proteins: MR effect estimates of plasma protein effects on sixteen CMR traits. (*continued*)

| Protein (uniprot) | Gene (ensembl)            | CMR trait            | MD (95%CI)             | P-value               | Multiple testing threshold | Q P-value | No. variants | MR model | PDTL source |
|-------------------|---------------------------|----------------------|------------------------|-----------------------|----------------------------|-----------|--------------|----------|-------------|
| COFA1 (P39059)    | COL15A1 (ENSG00000204291) | LV - EF (%)          | 0.01 (-0.03; 0.05)     | $5.8 \times 10^{-1}$  |                            | 0.809     | 30           | IVW      |             |
|                   |                           | LV - EDV (ml)        | 0.06 (-0.27; 0.39)     | $7.4 \times 10^{-1}$  |                            | 0.248     | 29           | MR Egger |             |
|                   |                           | LV - EDM (g)         | 0.03 (-0.14; 0.19)     | $7.7 \times 10^{-1}$  |                            | 0.039     | 26           | MR Egger |             |
|                   |                           | RV - SV (ml)         | 0.68 (-0.76; 2.13)     | $3.5 \times 10^{-1}$  | $7.81 \times 10^{-6}$      | 0.350     | 18           | MR Egger | Interval    |
|                   |                           | RV - PFR (ml/s)      | -0.06 (-2.05; 1.93)    | $9.5 \times 10^{-1}$  |                            | 0.645     | 18           | IVW      |             |
|                   |                           | RV - PER (ml/s)      | 5.06 (-2.63; 12.75)    | $2.0 \times 10^{-1}$  |                            | 0.535     | 18           | MR Egger |             |
|                   |                           | RV - PAFR (ml/s)     | -2.24 (-10.98; 6.50)   | $6.2 \times 10^{-1}$  |                            | 0.877     | 18           | MR Egger |             |
|                   |                           | RV - ESV (ml)        | 0.65 (-0.77; 2.06)     | $3.7 \times 10^{-1}$  |                            | 0.619     | 18           | MR Egger |             |
|                   |                           | RV - EF (%)          | 0.01 (-0.13; 0.16)     | $8.8 \times 10^{-1}$  |                            | 0.872     | 18           | IVW      |             |
|                   |                           | RV - EDV (ml)        | -1.82 (-2.47; -1.17)   | $3.7 \times 10^{-8}$  |                            | 0.595     | 17           | IVW      |             |
|                   |                           | LV - SV (ml)         | 0.26 (-0.14; 0.67)     | $2.0 \times 10^{-1}$  |                            | 0.439     | 17           | IVW      |             |
|                   |                           | LV - PFR (ml/s)      | -5.55 (-7.88; -3.22)   | $3.0 \times 10^{-6}$  |                            | 0.405     | 18           | IVW      |             |
|                   |                           | LV - PER (ml/s)      | 4.61 (-3.68; 12.91)    | $2.8 \times 10^{-1}$  |                            | 0.516     | 18           | MR Egger |             |
|                   |                           | LV - PAFR (ml/s)     | -4.25 (-13.47; 4.97)   | $3.7 \times 10^{-1}$  |                            | 0.545     | 18           | MR Egger |             |
|                   |                           | LV - MVR (g/ml)      | 0.00 (-0.00; 0.01)     | $4.5 \times 10^{-1}$  |                            | 0.628     | 18           | MR Egger |             |
|                   |                           | LV - ESV (ml)        | -0.44 (-0.86; -0.02)   | $4.0 \times 10^{-2}$  |                            | 0.124     | 18           | IVW      |             |
| LV - EF (%)       | -0.01 (-0.55; 0.53)       | $9.7 \times 10^{-1}$ |                        | 0.617                 | 18                         | MR Egger  |              |          |             |
| LV - EDV (ml)     | 0.17 (-0.56; 0.89)        | $6.5 \times 10^{-1}$ |                        | 0.111                 | 18                         | IVW       |              |          |             |
| LV - EDM (g)      | 0.17 (-0.16; 0.50)        | $3.2 \times 10^{-1}$ |                        | 0.801                 | 18                         | IVW       |              |          |             |
| AT1B2 (P14415)    | ATP1B2 (ENSG00000129244)  | RV - SV (ml)         | -0.50 (-0.79; -0.21)   | $8.1 \times 10^{-4}$  | $7.81 \times 10^{-6}$      | <0.001    | 16           | IVW      | Interval    |
|                   |                           | RV - PFR (ml/s)      | -3.53 (-4.99; -2.08)   | $1.9 \times 10^{-6}$  |                            | 0.012     | 17           | IVW      |             |
|                   |                           | RV - PER (ml/s)      | -0.35 (-1.95; 1.26)    | $6.7 \times 10^{-1}$  |                            | <0.001    | 16           | IVW      |             |
|                   |                           | RV - PAFR (ml/s)     | 0.89 (-3.84; 5.61)     | $7.1 \times 10^{-1}$  |                            | 0.331     | 21           | MR Egger |             |
|                   |                           | RV - ESV (ml)        | -0.92 (-1.18; -0.66)   | $6.4 \times 10^{-12}$ |                            | 0.003     | 19           | IVW      |             |
|                   |                           | RV - EF (%)          | 0.28 (0.00; 0.56)      | $4.8 \times 10^{-2}$  |                            | 0.046     | 20           | MR Egger |             |
|                   |                           | RV - EDV (ml)        | -0.68 (-2.00; 0.65)    | $3.2 \times 10^{-1}$  |                            | <0.001    | 18           | MR Egger |             |
|                   |                           | LV - SV (ml)         | 0.12 (-0.20; 0.44)     | $4.6 \times 10^{-1}$  |                            | <0.001    | 15           | IVW      |             |
|                   |                           | LV - PFR (ml/s)      | 3.83 (1.65; 6.02)      | $5.7 \times 10^{-4}$  |                            | 0.091     | 16           | IVW      |             |
|                   |                           | LV - PER (ml/s)      | 0.70 (-1.00; 2.40)     | $4.2 \times 10^{-1}$  |                            | 0.028     | 18           | IVW      |             |
|                   |                           | LV - PAFR (ml/s)     | -6.29 (-11.51; -1.08)  | $1.8 \times 10^{-2}$  |                            | 0.141     | 21           | MR Egger |             |
|                   |                           | LV - MVR (g/ml)      | -0.00 (-0.00; -0.00)   | $4.5 \times 10^{-2}$  |                            | 0.267     | 16           | IVW      |             |
|                   |                           | LV - ESV (ml)        | -0.32 (-1.06; 0.43)    | $4.0 \times 10^{-1}$  |                            | 0.023     | 19           | MR Egger |             |
|                   |                           | LV - EF (%)          | 0.05 (-0.06; 0.16)     | $3.4 \times 10^{-1}$  |                            | 0.433     | 18           | IVW      |             |
|                   |                           | LV - EDV (ml)        | 0.51 (-0.06; 1.09)     | $8.2 \times 10^{-2}$  |                            | 0.002     | 14           | IVW      |             |
|                   |                           | LV - EDM (g)         | 0.03 (-0.78; 0.83)     | $9.5 \times 10^{-1}$  |                            | 0.102     | 21           | MR Egger |             |
| VGFR3 (P35916)    | FLT4 (ENSG00000037280)    | RV - SV (ml)         | -1.47 (-2.96; 0.02)    | $5.3 \times 10^{-2}$  | $7.81 \times 10^{-6}$      | 0.552     | 22           | MR Egger | Interval    |
|                   |                           | RV - PFR (ml/s)      | -1.43 (-3.01; 0.15)    | $7.5 \times 10^{-2}$  |                            | 0.901     | 23           | IVW      |             |
|                   |                           | RV - PER (ml/s)      | -11.76 (-20.13; -3.39) | $5.9 \times 10^{-3}$  |                            | 0.006     | 20           | MR Egger |             |
|                   |                           | RV - PAFR (ml/s)     | 0.45 (-1.43; 2.32)     | $6.4 \times 10^{-1}$  |                            | 0.006     | 22           | IVW      |             |
|                   |                           | RV - ESV (ml)        | -0.14 (-0.45; 0.17)    | $3.8 \times 10^{-1}$  |                            | 0.373     | 23           | IVW      |             |
|                   |                           | RV - EF (%)          | -0.51 (-1.09; 0.07)    | $8.5 \times 10^{-2}$  |                            | 0.009     | 22           | MR Egger |             |
|                   |                           | RV - EDV (ml)        | -0.10 (-0.59; 0.39)    | $6.8 \times 10^{-1}$  |                            | 0.677     | 23           | IVW      |             |
|                   |                           | LV - SV (ml)         | 0.27 (-1.29; 1.83)     | $7.4 \times 10^{-1}$  |                            | 0.417     | 22           | MR Egger |             |
|                   |                           | LV - PFR (ml/s)      | 4.44 (2.57; 6.30)      | $3.0 \times 10^{-6}$  |                            | 0.602     | 21           | IVW      |             |
|                   |                           | LV - PER (ml/s)      | 2.04 (-0.12; 4.20)     | $6.4 \times 10^{-2}$  |                            | 0.006     | 21           | IVW      |             |
|                   |                           | LV - PAFR (ml/s)     | -10.41 (-22.03; 1.21)  | $7.9 \times 10^{-2}$  |                            | 0.137     | 22           | MR Egger |             |
|                   |                           | LV - MVR (g/ml)      | -0.00 (-0.00; -0.00)   | $1.5 \times 10^{-2}$  |                            | 0.035     | 23           | IVW      |             |
|                   |                           | LV - ESV (ml)        | 0.24 (-0.04; 0.53)     | $9.0 \times 10^{-2}$  |                            | 0.889     | 23           | IVW      |             |
|                   |                           | LV - EF (%)          | -0.65 (-1.23; -0.06)   | $3.1 \times 10^{-2}$  |                            | 0.464     | 22           | MR Egger |             |
|                   |                           | LV - EDV (ml)        | 1.57 (-0.87; 4.01)     | $2.1 \times 10^{-1}$  |                            | 0.871     | 22           | MR Egger |             |
|                   |                           | LV - EDM (g)         | -0.36 (-0.63; -0.10)   | $6.5 \times 10^{-3}$  |                            | 0.006     | 23           | IVW      |             |
| RENI (P00797)     | REN (ENSG00000143839)     | RV - SV (ml)         | -0.01 (-1.12; 1.10)    | $9.9 \times 10^{-1}$  | $7.81 \times 10^{-6}$      | 0.666     | 11           | IVW      | Scallop     |
|                   |                           | RV - PFR (ml/s)      | 7.60 (3.50; 11.70)     | $2.8 \times 10^{-4}$  |                            | 0.816     | 12           | IVW      |             |
|                   |                           | RV - PER (ml/s)      | -14.59 (-27.63; -1.54) | $2.8 \times 10^{-2}$  |                            | 0.729     | 11           | MR Egger |             |
|                   |                           | RV - PAFR (ml/s)     | -2.12 (-6.97; 2.73)    | $3.9 \times 10^{-1}$  |                            | 0.043     | 12           | IVW      |             |
|                   |                           | RV - ESV (ml)        | -1.08 (-1.98; -0.18)   | $1.8 \times 10^{-2}$  |                            | 0.210     | 12           | IVW      |             |
|                   |                           | RV - EF (%)          | -0.07 (-0.64; 0.51)    | $8.2 \times 10^{-1}$  |                            | 0.059     | 11           | IVW      |             |
|                   |                           | RV - EDV (ml)        | 0.80 (-0.47; 2.07)     | $2.2 \times 10^{-1}$  |                            | 0.782     | 12           | IVW      |             |
|                   |                           | LV - SV (ml)         | 1.40 (0.62; 2.18)      | $4.5 \times 10^{-4}$  |                            | 0.491     | 12           | IVW      |             |
|                   |                           | LV - PFR (ml/s)      | 9.64 (4.94; 14.34)     | $5.8 \times 10^{-5}$  |                            | 0.436     | 12           | IVW      |             |
|                   |                           | LV - PER (ml/s)      | -1.88 (-16.68; 12.92)  | $8.0 \times 10^{-1}$  |                            | 0.351     | 11           | MR Egger |             |
| LV - PAFR (ml/s)  | 0.64 (-4.75; 6.03)        | $8.2 \times 10^{-1}$ |                        | 0.343                 | 12                         | IVW       |              |          |             |



**Table S10:** CMR drugged proteins: MR effect estimates of plasma protein effects on sixteen CMR traits. (*continued*)

| Protein (uniprot) | Gene (ensembl)          | CMR trait            | MD (95%CI)             | P-value              | Multiple testing threshold | Q P-value | No. variants | MR model | PDTL source |
|-------------------|-------------------------|----------------------|------------------------|----------------------|----------------------------|-----------|--------------|----------|-------------|
|                   |                         | LV - MVR (g/ml)      | -0.00 (-0.01; 0.00)    | $1.4 \times 10^{-1}$ |                            | 0.354     | 12           | IWW      |             |
|                   |                         | LV - ESV (ml)        | -0.82 (-1.55; -0.09)   | $2.7 \times 10^{-2}$ |                            | 0.972     | 12           | IWW      |             |
|                   |                         | LV - EF (%)          | 0.97 (0.59; 1.35)      | $6.0 \times 10^{-7}$ |                            | 0.086     | 12           | IWW      |             |
|                   |                         | LV - EDV (ml)        | 0.56 (-0.68; 1.80)     | $3.8 \times 10^{-1}$ |                            | 0.984     | 12           | IWW      |             |
|                   |                         | LV - EDM (g)         | 0.04 (-1.86; 1.93)     | $9.7 \times 10^{-1}$ |                            | 0.740     | 12           | MR Egger |             |
| LAMC2 (Q13753)    | LAMC2 (ENSG00000058085) | RV - SV (ml)         | -0.07 (-0.38; 0.24)    | $6.7 \times 10^{-1}$ | $7.81 \times 10^{-6}$      | 0.033     | 34           | MR Egger | Interval    |
|                   |                         | RV - PFR (ml/s)      | 1.98 (0.30; 3.65)      | $2.1 \times 10^{-2}$ |                            | 0.007     | 35           | MR Egger |             |
|                   |                         | RV - PER (ml/s)      | 2.83 (0.91; 4.75)      | $3.9 \times 10^{-3}$ |                            | 0.184     | 35           | MR Egger |             |
|                   |                         | RV - PAFR (ml/s)     | 5.33 (3.18; 7.48)      | $1.2 \times 10^{-6}$ |                            | 0.216     | 35           | MR Egger |             |
|                   |                         | RV - ESV (ml)        | -0.28 (-0.67; 0.11)    | $1.6 \times 10^{-1}$ |                            | 0.057     | 34           | MR Egger |             |
|                   |                         | RV - EF (%)          | 0.17 (0.05; 0.30)      | $7.2 \times 10^{-3}$ |                            | 0.009     | 33           | MR Egger |             |
|                   |                         | RV - EDV (ml)        | -0.42 (-0.93; 0.10)    | $1.2 \times 10^{-1}$ |                            | 0.004     | 34           | MR Egger |             |
|                   |                         | LV - SV (ml)         | -0.50 (-0.88; -0.12)   | $9.4 \times 10^{-3}$ |                            | 0.068     | 35           | MR Egger |             |
|                   |                         | LV - PFR (ml/s)      | -0.23 (-2.15; 1.68)    | $8.1 \times 10^{-1}$ |                            | 0.034     | 35           | MR Egger |             |
|                   |                         | LV - PER (ml/s)      | -0.32 (-1.41; 0.77)    | $5.7 \times 10^{-1}$ |                            | 0.026     | 35           | IWW      |             |
|                   |                         | LV - PAFR (ml/s)     | 2.82 (1.52; 4.12)      | $2.1 \times 10^{-5}$ |                            | 0.044     | 34           | IWW      |             |
|                   |                         | LV - MVR (g/ml)      | 0.00 (0.00; 0.00)      | $2.3 \times 10^{-4}$ |                            | 0.007     | 34           | MR Egger |             |
|                   |                         | LV - ESV (ml)        | -0.17 (-0.35; -0.00)   | $5.0 \times 10^{-2}$ |                            | 0.006     | 35           | IWW      |             |
|                   |                         | LV - EF (%)          | 0.08 (-0.06; 0.23)     | $2.4 \times 10^{-1}$ |                            | 0.105     | 35           | MR Egger |             |
|                   |                         | LV - EDV (ml)        | -1.00 (-1.51; -0.49)   | $1.2 \times 10^{-4}$ |                            | 0.003     | 34           | MR Egger |             |
|                   |                         | LV - EDM (g)         | -0.13 (-0.30; 0.05)    | $1.6 \times 10^{-1}$ |                            | 0.196     | 35           | IWW      |             |
| IL12B (P29460)    | IL12B (ENSG00000113302) | RV - SV (ml)         | -1.02 (-1.99; -0.06)   | $3.8 \times 10^{-2}$ | $7.81 \times 10^{-6}$      | 0.015     | 15           | MR Egger | Interval    |
|                   |                         | RV - PFR (ml/s)      | -13.36 (-18.91; -7.80) | $2.4 \times 10^{-6}$ |                            | 0.314     | 15           | MR Egger |             |
|                   |                         | RV - PER (ml/s)      | 2.12 (0.38; 3.86)      | $1.7 \times 10^{-2}$ |                            | 0.777     | 16           | IWW      |             |
|                   |                         | RV - PAFR (ml/s)     | 2.64 (0.46; 4.81)      | $1.8 \times 10^{-2}$ |                            | <0.001    | 14           | IWW      |             |
|                   |                         | RV - ESV (ml)        | 0.47 (0.12; 0.82)      | $9.0 \times 10^{-3}$ |                            | 0.042     | 14           | IWW      |             |
|                   |                         | RV - EF (%)          | 0.13 (-0.26; 0.52)     | $5.2 \times 10^{-1}$ |                            | 0.361     | 15           | MR Egger |             |
|                   |                         | RV - EDV (ml)        | 1.45 (-0.75; 3.65)     | $2.0 \times 10^{-1}$ |                            | 0.002     | 13           | MR Egger |             |
|                   |                         | LV - SV (ml)         | -0.66 (-1.65; 0.33)    | $1.9 \times 10^{-1}$ |                            | 0.953     | 15           | MR Egger |             |
|                   |                         | LV - PFR (ml/s)      | -2.65 (-8.58; 3.27)    | $3.8 \times 10^{-1}$ |                            | 0.571     | 15           | MR Egger |             |
|                   |                         | LV - PER (ml/s)      | -0.19 (-2.36; 1.99)    | $8.7 \times 10^{-1}$ |                            | 0.168     | 16           | IWW      |             |
|                   |                         | LV - PAFR (ml/s)     | -1.90 (-3.99; 0.19)    | $7.4 \times 10^{-2}$ |                            | 0.495     | 16           | IWW      |             |
|                   |                         | LV - MVR (g/ml)      | 0.00 (-0.00; 0.01)     | $3.0 \times 10^{-1}$ |                            | 0.994     | 15           | MR Egger |             |
|                   |                         | LV - ESV (ml)        | -0.43 (-0.77; -0.09)   | $1.2 \times 10^{-2}$ |                            | 0.209     | 16           | IWW      |             |
|                   |                         | LV - EF (%)          | 0.18 (0.06; 0.30)      | $3.8 \times 10^{-3}$ |                            | 0.726     | 16           | IWW      |             |
|                   |                         | LV - EDV (ml)        | -1.64 (-3.36; 0.08)    | $6.2 \times 10^{-2}$ |                            | 0.278     | 15           | MR Egger |             |
|                   |                         | LV - EDM (g)         | -0.69 (-1.69; 0.31)    | $1.7 \times 10^{-1}$ |                            | 0.176     | 15           | MR Egger |             |
| FGFR3 (P22607)    | FGFR3 (ENSG00000068078) | RV - SV (ml)         | 0.22 (-0.36; 0.80)     | $4.5 \times 10^{-1}$ | $7.81 \times 10^{-6}$      | 0.327     | 9            | IWW      | Interval    |
|                   |                         | RV - PFR (ml/s)      | 2.24 (-0.89; 5.37)     | $1.6 \times 10^{-1}$ |                            | 0.888     | 8            | IWW      |             |
|                   |                         | RV - PER (ml/s)      | -0.83 (-3.85; 2.18)    | $5.9 \times 10^{-1}$ |                            | 0.505     | 9            | IWW      |             |
|                   |                         | RV - PAFR (ml/s)     | -2.92 (-6.35; 0.51)    | $9.5 \times 10^{-2}$ |                            | 0.843     | 9            | IWW      |             |
|                   |                         | RV - ESV (ml)        | -1.31 (-2.00; -0.62)   | $1.9 \times 10^{-4}$ |                            | 0.136     | 9            | IWW      |             |
|                   |                         | RV - EF (%)          | -0.64 (-2.09; 0.82)    | $3.9 \times 10^{-1}$ |                            | 0.324     | 9            | MR Egger |             |
|                   |                         | RV - EDV (ml)        | -1.02 (-1.91; -0.12)   | $2.7 \times 10^{-2}$ |                            | 0.714     | 9            | IWW      |             |
|                   |                         | LV - SV (ml)         | -0.09 (-0.64; 0.47)    | $7.6 \times 10^{-1}$ |                            | 0.906     | 9            | IWW      |             |
|                   |                         | LV - PFR (ml/s)      | 4.15 (0.45; 7.85)      | $2.8 \times 10^{-2}$ |                            | 0.380     | 8            | IWW      |             |
|                   |                         | LV - PER (ml/s)      | -4.81 (-8.07; -1.56)   | $3.7 \times 10^{-3}$ |                            | 0.498     | 9            | IWW      |             |
|                   |                         | LV - PAFR (ml/s)     | -13.09 (-17.53; -8.65) | $7.6 \times 10^{-9}$ |                            | 0.148     | 9            | IWW      |             |
|                   |                         | LV - MVR (g/ml)      | -0.00 (-0.00; 0.00)    | $5.0 \times 10^{-1}$ |                            | 0.446     | 9            | IWW      |             |
|                   |                         | LV - ESV (ml)        | -1.04 (-1.69; -0.38)   | $1.8 \times 10^{-3}$ |                            | 0.215     | 8            | IWW      |             |
|                   |                         | LV - EF (%)          | 0.36 (0.08; 0.65)      | $1.2 \times 10^{-2}$ |                            | 0.146     | 8            | IWW      |             |
|                   |                         | LV - EDV (ml)        | -1.52 (-2.40; -0.64)   | $6.9 \times 10^{-4}$ |                            | 0.486     | 9            | IWW      |             |
|                   |                         | LV - EDM (g)         | -1.13 (-1.70; -0.57)   | $8.6 \times 10^{-5}$ |                            | 0.199     | 9            | IWW      |             |
| EPHB6 (O15197)    | EPHB6 (ENSG00000106123) | RV - SV (ml)         | -0.90 (-1.37; -0.43)   | $1.6 \times 10^{-4}$ | $7.81 \times 10^{-6}$      | 0.354     | 13           | IWW      | Interval    |
|                   |                         | RV - PFR (ml/s)      | -6.88 (-9.27; -4.50)   | $1.6 \times 10^{-8}$ |                            | 0.007     | 13           | IWW      |             |
|                   |                         | RV - PER (ml/s)      | -9.20 (-15.76; -2.63)  | $6.0 \times 10^{-3}$ |                            | 0.320     | 15           | MR Egger |             |
|                   |                         | RV - PAFR (ml/s)     | 0.51 (-2.46; 3.49)     | $7.4 \times 10^{-1}$ |                            | 0.848     | 12           | IWW      |             |
|                   |                         | RV - ESV (ml)        | 0.05 (-0.48; 0.57)     | $8.7 \times 10^{-1}$ |                            | 0.196     | 13           | IWW      |             |
|                   |                         | RV - EF (%)          | 0.18 (-0.25; 0.61)     | $4.2 \times 10^{-1}$ |                            | 0.870     | 15           | MR Egger |             |
|                   |                         | RV - EDV (ml)        | -0.96 (-1.85; -0.07)   | $3.4 \times 10^{-2}$ |                            | 0.139     | 13           | IWW      |             |
|                   |                         | LV - SV (ml)         | -0.95 (-1.41; -0.50)   | $4.1 \times 10^{-5}$ |                            | 0.706     | 13           | IWW      |             |
| LV - PFR (ml/s)   | -5.11 (-8.38; -1.83)    | $2.2 \times 10^{-3}$ |                        | 0.139                | 13                         | IWW       |              |          |             |

**Table S10:** CMR drugged proteins: MR effect estimates of plasma protein effects on sixteen CMR traits. (*continued*)

| Protein (uniprot) | Gene (ensembl)          | CMR trait        | MD (95%CI)           | P-value               | Multiple testing threshold | Q P-value | No. variants | MR model | PQTL source |
|-------------------|-------------------------|------------------|----------------------|-----------------------|----------------------------|-----------|--------------|----------|-------------|
|                   |                         | LV - PER (ml/s)  | -0.32 (-2.99; 2.36)  | 8.2×10 <sup>-1</sup>  |                            | 0.680     | 13           | IVW      |             |
|                   |                         | LV - PAFR (ml/s) | -2.65 (-6.26; 0.96)  | 1.5×10 <sup>-1</sup>  |                            | 0.125     | 13           | IVW      |             |
|                   |                         | LV - MVR (g/ml)  | 0.00 (0.00; 0.01)    | 2.1×10 <sup>-2</sup>  |                            | 0.851     | 13           | IVW      |             |
|                   |                         | LV - ESV (ml)    | -0.47 (-0.91; -0.03) | 3.5×10 <sup>-2</sup>  |                            | 0.381     | 13           | IVW      |             |
|                   |                         | LV - EF (%)      | -0.12 (-0.30; 0.05)  | 1.7×10 <sup>-1</sup>  |                            | 0.491     | 13           | IVW      |             |
|                   |                         | LV - EDV (ml)    | -1.48 (-2.20; -0.75) | 6.3×10 <sup>-5</sup>  |                            | 0.639     | 13           | IVW      |             |
|                   |                         | LV - EDM (g)     | -0.49 (-0.88; -0.09) | 1.6×10 <sup>-2</sup>  |                            | 0.515     | 13           | IVW      |             |
| CD33 (P20138)     | CD33 (ENSG000001105383) | RV - SV (ml)     | 0.00 (-0.11; 0.11)   | 9.8×10 <sup>-1</sup>  | 7.81×10 <sup>-6</sup>      | <0.001    | 48           | IVW      | Interval    |
|                   |                         | RV - PFR (ml/s)  | -0.17 (-1.29; 0.95)  | 7.7×10 <sup>-1</sup>  |                            | 0.851     | 51           | MR Egger |             |
|                   |                         | RV - PER (ml/s)  | -1.39 (-2.48; -0.31) | 1.2×10 <sup>-2</sup>  |                            | <0.001    | 53           | MR Egger |             |
|                   |                         | RV - PAFR (ml/s) | 0.51 (-0.88; 1.89)   | 4.7×10 <sup>-1</sup>  |                            | 0.101     | 53           | MR Egger |             |
|                   |                         | RV - ESV (ml)    | 0.21 (-0.01; 0.44)   | 6.3×10 <sup>-2</sup>  |                            | 0.286     | 51           | MR Egger |             |
|                   |                         | RV - EF (%)      | -0.11 (-0.20; -0.03) | 7.6×10 <sup>-3</sup>  |                            | 0.341     | 51           | MR Egger |             |
|                   |                         | RV - EDV (ml)    | 0.06 (-0.27; 0.39)   | 7.4×10 <sup>-1</sup>  |                            | 0.002     | 52           | MR Egger |             |
|                   |                         | LV - SV (ml)     | 0.14 (-0.08; 0.35)   | 2.1×10 <sup>-1</sup>  |                            | 0.027     | 50           | MR Egger |             |
|                   |                         | LV - PFR (ml/s)  | -0.46 (-1.75; 0.82)  | 4.8×10 <sup>-1</sup>  |                            | 0.002     | 51           | MR Egger |             |
|                   |                         | LV - PER (ml/s)  | 0.53 (-0.06; 1.11)   | 7.8×10 <sup>-2</sup>  |                            | 0.687     | 53           | IVW      |             |
|                   |                         | LV - PAFR (ml/s) | 0.65 (-0.14; 1.44)   | 1.1×10 <sup>-1</sup>  |                            | 0.129     | 48           | IVW      |             |
|                   |                         | LV - MVR (g/ml)  | 0.00 (0.00; 0.00)    | 5.9×10 <sup>-5</sup>  |                            | 0.038     | 51           | MR Egger |             |
|                   |                         | LV - ESV (ml)    | 0.25 (0.05; 0.45)    | 1.3×10 <sup>-2</sup>  |                            | <0.001    | 51           | MR Egger |             |
|                   |                         | LV - EF (%)      | -0.03 (-0.12; 0.06)  | 4.8×10 <sup>-1</sup>  |                            | <0.001    | 50           | MR Egger |             |
|                   |                         | LV - EDV (ml)    | 0.34 (0.16; 0.52)    | 2.0×10 <sup>-4</sup>  |                            | <0.001    | 47           | IVW      |             |
|                   |                         | LV - EDM (g)     | 0.62 (0.45; 0.80)    | 4.8×10 <sup>-12</sup> |                            | <0.001    | 52           | MR Egger |             |
| CAH6 (P23280)     | CA6 (ENSG00000131686)   | RV - SV (ml)     | 0.12 (0.00; 0.24)    | 4.6×10 <sup>-2</sup>  | 7.81×10 <sup>-6</sup>      | <0.001    | 50           | IVW      | Interval    |
|                   |                         | RV - PFR (ml/s)  | 1.54 (0.84; 2.24)    | 1.5×10 <sup>-5</sup>  |                            | <0.001    | 44           | IVW      |             |
|                   |                         | RV - PER (ml/s)  | -0.38 (-1.07; 0.31)  | 2.8×10 <sup>-1</sup>  |                            | <0.001    | 45           | IVW      |             |
|                   |                         | RV - PAFR (ml/s) | -2.01 (-2.82; -1.19) | 1.3×10 <sup>-6</sup>  |                            | 0.137     | 50           | IVW      |             |
|                   |                         | RV - ESV (ml)    | 0.14 (-0.23; 0.51)   | 4.5×10 <sup>-1</sup>  |                            | 0.056     | 49           | MR Egger |             |
|                   |                         | RV - EF (%)      | 0.03 (-0.09; 0.16)   | 6.2×10 <sup>-1</sup>  |                            | 0.032     | 47           | MR Egger |             |
|                   |                         | RV - EDV (ml)    | 0.19 (-0.40; 0.78)   | 5.3×10 <sup>-1</sup>  |                            | 0.059     | 50           | MR Egger |             |
|                   |                         | LV - SV (ml)     | 0.05 (-0.31; 0.40)   | 8.0×10 <sup>-1</sup>  |                            | 0.067     | 51           | MR Egger |             |
|                   |                         | LV - PFR (ml/s)  | 1.06 (0.34; 1.77)    | 3.7×10 <sup>-3</sup>  |                            | 0.003     | 50           | IVW      |             |
|                   |                         | LV - PER (ml/s)  | 0.65 (-0.05; 1.35)   | 6.8×10 <sup>-2</sup>  |                            | 0.006     | 50           | IVW      |             |
|                   |                         | LV - PAFR (ml/s) | -1.87 (-4.00; 0.25)  | 8.4×10 <sup>-2</sup>  |                            | 0.377     | 50           | MR Egger |             |
|                   |                         | LV - MVR (g/ml)  | -0.00 (-0.00; -0.00) | 4.0×10 <sup>-5</sup>  |                            | 0.002     | 49           | IVW      |             |
|                   |                         | LV - ESV (ml)    | 0.26 (-0.07; 0.59)   | 1.2×10 <sup>-1</sup>  |                            | 0.061     | 51           | MR Egger |             |
|                   |                         | LV - EF (%)      | -0.03 (-0.08; 0.02)  | 3.0×10 <sup>-1</sup>  |                            | 0.082     | 49           | IVW      |             |
|                   |                         | LV - EDV (ml)    | 0.31 (-0.23; 0.84)   | 2.6×10 <sup>-1</sup>  |                            | 0.153     | 51           | MR Egger |             |
|                   |                         | LV - EDM (g)     | -0.07 (-0.18; 0.04)  | 2.3×10 <sup>-1</sup>  |                            | 0.543     | 48           | IVW      |             |

*General:*

CMR: Cardiac MRI, MR: Mendelian randomization, MD: mean difference, CI: confidence interval. Effect estimates are coded towards protein and CMR increasing directions.

**Table S11:** CMR druggable proteins: ChEMBL and HPA annotations.

| Protein (uniprot) | Compound                                                                       | Drug type          | Target type     | Drug action                                     | Clinical development phase | Curated Indications                                                   | mRNA Tissue specificity | Above average mRNA expression                                 |
|-------------------|--------------------------------------------------------------------------------|--------------------|-----------------|-------------------------------------------------|----------------------------|-----------------------------------------------------------------------|-------------------------|---------------------------------------------------------------|
| CASP8 (Q14790)    | Nivocasan                                                                      | Small_Mol          | Single Protein  | Inhibitor                                       | 2                          |                                                                       | 0.776                   | Granulocytes, Spleen, Thymus, Tonsil                          |
| CASP8 (Q14790)    | Emricasan                                                                      | Small_Mol          | Protein Family  | Inhibitor                                       | 2                          | Diabetes Mellitus                                                     | 0.776                   | Granulocytes, Spleen, Thymus, Tonsil                          |
| DKK1 (O94907)     | Bhq-880                                                                        | Bio_Mol, Small_Mol | Single Protein  | Inhibitor                                       | 2                          |                                                                       | 0.986                   | Placenta                                                      |
| ERAP1 (Q9NZ08)    | Tosedostat                                                                     | Bio_Mol            | Protein Family  | Inhibitor                                       | 2                          |                                                                       | 0.704                   | Pituitary gland, Small intestine, Thymus                      |
| ERAP2 (Q6P179)    | Tosedostat                                                                     | Small_Mol          | Protein Family  | Inhibitor                                       | 2                          |                                                                       | 0.727                   | Colon, Lymph node, Spleen, Thymus                             |
| FCER2 (P06734)    | Lumiliximab                                                                    | Bio_Mol, Small_Mol | Single Protein  | Antagonist                                      | 2                          |                                                                       | 0.968                   | B-cells, Spleen, Tonsil                                       |
| GFRA1 (P56159)    | Liatermin                                                                      | Bio_Mol            | Single Protein  | Agonist                                         | 1                          |                                                                       | 0.747                   | Adipose tissue, Breast, Epididymis, Liver                     |
| ICOSL (O75144)    | Amg-557                                                                        | Bio_Mol            | Single Protein  | Inhibitor                                       | 1                          |                                                                       | 0.783                   | Bone marrow, Hippocampal formation, Spinal cord               |
| IL8 (P10145)      | Abx-II8, Humax-II8                                                             | Bio_Mol, Small_Mol | Single Protein  | Inhibitor                                       | 2                          | Bronchitis, Chronic                                                   | 0.976                   | Bone marrow, Lung                                             |
| LYAM1 (P14151)    | Rivipansel, Aselizumab                                                         | Bio_Mol, Small_Mol | Single Protein  | Antagonist, Inhibitor                           | 3                          | Anemia, Sickle Cell                                                   | 0.935                   | Granulocytes, NK-cells                                        |
| LYAM1 (P14151)    | Bimosiamose                                                                    | Bio_Mol, Small_Mol | Protein Family  | Inhibitor                                       | 2                          | Pulmonary Disease, Chronic Obstructive                                | 0.935                   | Granulocytes, NK-cells                                        |
| MFGM (Q08431)     | Bre-3 90Y                                                                      | Bio_Mol            | Single Protein  | Binding Agent                                   | 1                          |                                                                       | 0.823                   | Breast, Endometrium, Heart muscle, Vagina                     |
| MK03 (P27361)     | Ravoxertinib, Mk-8353, Ulixertinib                                             | Small_Mol          | Single Protein  | Inhibitor                                       | 2                          |                                                                       | 0.650                   | Amygdala, Cerebral cortex, Small intestine                    |
| MMP9 (P14780)     | Marimastat, Andecaliximab                                                      | Bio_Mol, Small_Mol | Single Protein  | Inhibitor                                       | 3                          | Pulmonary Disease, Chronic Obstructive                                | 0.916                   | Adipose tissue, Bone marrow, Granulocytes, Lymph node, Spleen |
| PA2GA (P14555)    | Varespladib, Varespladib Methyl                                                | Bio_Mol, Small_Mol | Single Protein  | Inhibitor                                       | 3                          | Acute Coronary Syndrome; Anemia, Sickle Cell; Coronary Artery Disease | 0.962                   | Liver                                                         |
| PD1L2 (Q9BQ51)    | Rhigm12B7                                                                      | Bio_Mol            | Single Protein  | Cross-Linking Agent                             | 1                          |                                                                       | 0.806                   | Adipose tissue, Lung, Placenta, Spleen                        |
| PMEL (P40967)     | Imc-Gp100                                                                      | Bio_Mol            | Single Protein  | Cross-Linking Agent                             | 0                          |                                                                       | 0.990                   | Retina                                                        |
| TDGF1 (P13385)    | Biib-015                                                                       | Bio_Mol            | Single Protein  | Binding Agent                                   | 1                          |                                                                       | 0.925                   | Kidney, Ovary, Spleen                                         |
| TGFB2 (P61812)    | Lerdelimumab, Fresolimumab                                                     | Bio_Mol            | Single Protein  | Inhibitor                                       | 3                          | Idiopathic Pulmonary Fibrosis                                         | 0.774                   | Placenta, Prostate, Seminal vesicle, Spinal cord              |
| TLR4 (O00206)     | Eritoran Tetrasodium                                                           | Bio_Mol, Small_Mol | Protein Complex | Antagonist                                      | 3                          |                                                                       | 0.753                   | Adipose tissue, Granulocytes, Lymph node, Spleen              |
| TNF12 (O43508)    | Ro-5458640, Biib-023                                                           | Bio_Mol            | Single Protein  | Inhibitor                                       | 1                          |                                                                       | 0.592                   | Adipose tissue, Vagina                                        |
| TNR5 (P25942)     | Dacetuzumab, Teneliximab, Pg-102, Lucatumumab, Cp-870893                       | Bio_Mol            | Single Protein  | Inhibitor, Partial Agonist, Antagonist, Agonist | 2                          |                                                                       | 0.781                   | Appendix, B-cells, Lymph node, Spleen, Tonsil                 |
| TR10B (O14763)    | Tigatuzumab, Dulanermin, Conatumumab, Drozitumab, Apomab, Lexatumumab, Lby-135 | Bio_Mol            | Single Protein  | Agonist                                         | 3                          |                                                                       | 0.676                   | Adipose tissue, Liver, Small intestine                        |

**General:**

Data were extracted from ChEMBL, and Human Protein Atlas. Indicates were curated for cardiovascular relevant traits. Tissues with above average mRNA expression were selected based on a z-statistic of at least 1.96. Tissue specificity ranges between 0 (ubiquitous expressed) and 1 (specifically expressed).

**Table S12:** CMR druggable proteins: MR effect estimates of plasma protein effects on sixteen CMR traits.

| Protein (uniprot) | Gene (ensembl)            | CMR trait        | MD (95%CI)            | P-value                | Multiple testing threshold | Q P-value | No. variants | MR model | PDTL source |
|-------------------|---------------------------|------------------|-----------------------|------------------------|----------------------------|-----------|--------------|----------|-------------|
| TDGF1 (P13385)    | TDGF1 (ENSG00000241186)   | RV - SV (ml)     | 0.24 (0.18; 0.30)     | $1.8 \times 10^{-15}$  | $7.81 \times 10^{-6}$      | <0.001    | 56           | IVW      | Interval    |
|                   |                           | RV - PFR (ml/s)  | 1.41 (0.94; 1.89)     | $4.1 \times 10^{-9}$   |                            | 0.002     | 58           | MR Egger |             |
|                   |                           | RV - PER (ml/s)  | 1.34 (0.93; 1.76)     | $3.0 \times 10^{-10}$  |                            | <0.001    | 55           | IVW      |             |
|                   |                           | RV - PAFR (ml/s) | 0.61 (0.12; 1.11)     | $1.6 \times 10^{-2}$   |                            | <0.001    | 48           | IVW      |             |
|                   |                           | RV - ESV (ml)    | -0.01 (-0.08; 0.06)   | $7.7 \times 10^{-1}$   |                            | 0.019     | 46           | IVW      |             |
|                   |                           | RV - EF (%)      | 0.08 (0.05; 0.10)     | $4.6 \times 10^{-10}$  |                            | 0.011     | 51           | IVW      |             |
|                   |                           | RV - EDV (ml)    | 0.20 (0.10; 0.30)     | $5.7 \times 10^{-5}$   |                            | <0.001    | 54           | IVW      |             |
|                   |                           | LV - SV (ml)     | 0.33 (0.24; 0.43)     | $8.6 \times 10^{-12}$  |                            | <0.001    | 57           | MR Egger |             |
|                   |                           | LV - PFR (ml/s)  | 0.61 (0.25; 0.98)     | $9.4 \times 10^{-4}$   |                            | 0.030     | 56           | IVW      |             |
|                   |                           | LV - PER (ml/s)  | 1.22 (0.77; 1.68)     | $1.6 \times 10^{-7}$   |                            | <0.001    | 60           | MR Egger |             |
|                   |                           | LV - PAFR (ml/s) | 0.76 (0.26; 1.26)     | $2.7 \times 10^{-3}$   |                            | <0.001    | 58           | MR Egger |             |
|                   |                           | LV - MVR (g/ml)  | 0.00 (0.00; 0.00)     | $1.6 \times 10^{-3}$   |                            | 0.016     | 50           | IVW      |             |
|                   |                           | LV - ESV (ml)    | -0.18 (-0.25; -0.12)  | $5.4 \times 10^{-8}$   |                            | 0.010     | 47           | IVW      |             |
|                   |                           | LV - EF (%)      | 0.08 (0.05; 0.10)     | $8.0 \times 10^{-9}$   |                            | <0.001    | 48           | IVW      |             |
|                   |                           | LV - EDV (ml)    | -0.17 (-0.27; -0.07)  | $9.3 \times 10^{-4}$   |                            | 0.003     | 50           | IVW      |             |
|                   |                           | LV - EDM (g)     | -0.11 (-0.16; -0.05)  | $2.2 \times 10^{-4}$   |                            | 0.013     | 49           | IVW      |             |
| PA2GA (P14555)    | PLA2G2A (ENSG00000188257) | RV - SV (ml)     | -0.30 (-0.45; -0.15)  | $8.0 \times 10^{-5}$   | $7.81 \times 10^{-6}$      | 0.032     | 52           | MR Egger | Interval    |
|                   |                           | RV - PFR (ml/s)  | -1.47 (-2.33; -0.61)  | $7.8 \times 10^{-4}$   |                            | <0.001    | 51           | MR Egger |             |
|                   |                           | RV - PER (ml/s)  | -0.73 (-1.77; 0.32)   | $1.7 \times 10^{-1}$   |                            | 0.019     | 46           | MR Egger |             |
|                   |                           | RV - PAFR (ml/s) | -1.43 (-2.50; -0.37)  | $8.4 \times 10^{-3}$   |                            | <0.001    | 50           | MR Egger |             |
|                   |                           | RV - ESV (ml)    | 0.40 (0.20; 0.60)     | $9.0 \times 10^{-5}$   |                            | 0.339     | 48           | MR Egger |             |
|                   |                           | RV - EF (%)      | -0.14 (-0.20; -0.08)  | $9.4 \times 10^{-6}$   |                            | 0.036     | 51           | MR Egger |             |
|                   |                           | RV - EDV (ml)    | 0.13 (-0.14; 0.40)    | $3.5 \times 10^{-1}$   |                            | 0.029     | 53           | MR Egger |             |
|                   |                           | LV - SV (ml)     | 0.28 (0.21; 0.34)     | $1.0 \times 10^{-100}$ |                            | 0.015     | 55           | IVW      |             |
|                   |                           | LV - PFR (ml/s)  | 0.35 (-0.18; 0.88)    | $2.0 \times 10^{-1}$   |                            | <0.001    | 52           | IVW      |             |
|                   |                           | LV - PER (ml/s)  | -2.70 (-3.60; -1.81)  | $2.9 \times 10^{-9}$   |                            | 0.013     | 49           | MR Egger |             |
|                   |                           | LV - PAFR (ml/s) | -2.65 (-3.89; -1.40)  | $3.0 \times 10^{-5}$   |                            | 0.052     | 53           | MR Egger |             |
|                   |                           | LV - MVR (g/ml)  | -0.00 (-0.00; -0.00)  | $1.0 \times 10^{-100}$ |                            | 0.003     | 50           | MR Egger |             |
|                   |                           | LV - ESV (ml)    | 0.57 (0.49; 0.64)     | $1.0 \times 10^{-100}$ |                            | <0.001    | 51           | IVW      |             |
|                   |                           | LV - EF (%)      | -0.15 (-0.18; -0.12)  | $1.0 \times 10^{-100}$ |                            | 0.403     | 55           | IVW      |             |
|                   |                           | LV - EDV (ml)    | 0.69 (0.42; 0.96)     | $4.1 \times 10^{-7}$   |                            | <0.001    | 54           | MR Egger |             |
|                   |                           | LV - EDM (g)     | 0.06 (-0.02; 0.13)    | $1.3 \times 10^{-1}$   |                            | <0.001    | 48           | IVW      |             |
| TNRS (P25942)     | CD40 (ENSG00000101017)    | RV - SV (ml)     | 0.67 (0.22; 1.13)     | $3.8 \times 10^{-3}$   | $7.81 \times 10^{-6}$      | 0.063     | 47           | MR Egger | Scallop     |
|                   |                           | RV - PFR (ml/s)  | 4.52 (3.54; 5.49)     | $1.0 \times 10^{-100}$ |                            | 0.046     | 49           | IVW      |             |
|                   |                           | RV - PER (ml/s)  | 2.71 (0.11; 5.31)     | $4.1 \times 10^{-2}$   |                            | 0.081     | 48           | MR Egger |             |
|                   |                           | RV - PAFR (ml/s) | 2.79 (1.39; 4.18)     | $8.9 \times 10^{-5}$   |                            | <0.001    | 44           | IVW      |             |
|                   |                           | RV - ESV (ml)    | 0.84 (0.62; 1.06)     | $4.1 \times 10^{-14}$  |                            | <0.001    | 45           | IVW      |             |
|                   |                           | RV - EF (%)      | 0.16 (-0.01; 0.33)    | $7.1 \times 10^{-2}$   |                            | 0.011     | 45           | MR Egger |             |
|                   |                           | RV - EDV (ml)    | 1.05 (0.64; 1.45)     | $3.3 \times 10^{-7}$   |                            | 0.093     | 49           | IVW      |             |
|                   |                           | LV - SV (ml)     | 0.76 (0.55; 0.96)     | $4.2 \times 10^{-13}$  |                            | <0.001    | 49           | IVW      |             |
|                   |                           | LV - PFR (ml/s)  | 0.90 (-1.79; 3.60)    | $5.1 \times 10^{-1}$   |                            | 0.071     | 51           | MR Egger |             |
|                   |                           | LV - PER (ml/s)  | -1.70 (-4.09; 0.69)   | $1.6 \times 10^{-1}$   |                            | <0.001    | 47           | MR Egger |             |
|                   |                           | LV - PAFR (ml/s) | -0.98 (-3.66; 1.70)   | $4.7 \times 10^{-1}$   |                            | <0.001    | 49           | MR Egger |             |
|                   |                           | LV - MVR (g/ml)  | -0.00 (-0.00; 0.00)   | $6.5 \times 10^{-2}$   |                            | 0.005     | 50           | MR Egger |             |
|                   |                           | LV - ESV (ml)    | 0.68 (0.47; 0.88)     | $7.0 \times 10^{-11}$  |                            | 0.025     | 45           | IVW      |             |
|                   |                           | LV - EF (%)      | 0.17 (0.01; 0.34)     | $4.1 \times 10^{-2}$   |                            | <0.001    | 46           | MR Egger |             |
|                   |                           | LV - EDV (ml)    | 0.60 (-0.28; 1.48)    | $1.8 \times 10^{-1}$   |                            | <0.001    | 42           | MR Egger |             |
|                   |                           | LV - EDM (g)     | 0.23 (0.05; 0.40)     | $1.1 \times 10^{-2}$   |                            | 0.032     | 47           | IVW      |             |
| TNF12 (O43508)    | TNFSF12 (ENSG00000239697) | RV - SV (ml)     | -1.22 (-2.14; -0.30)  | $9.3 \times 10^{-3}$   | $7.81 \times 10^{-6}$      | 0.052     | 15           | MR Egger | Interval    |
|                   |                           | RV - PFR (ml/s)  | -7.51 (-11.28; -3.73) | $9.6 \times 10^{-5}$   |                            | 0.006     | 15           | MR Egger |             |
|                   |                           | RV - PER (ml/s)  | -1.21 (-2.49; 0.06)   | $6.2 \times 10^{-2}$   |                            | 0.005     | 14           | IVW      |             |
|                   |                           | RV - PAFR (ml/s) | -0.29 (-1.70; 1.12)   | $6.9 \times 10^{-1}$   |                            | 0.929     | 17           | IVW      |             |
|                   |                           | RV - ESV (ml)    | -1.54 (-2.35; -0.73)  | $1.9 \times 10^{-4}$   |                            | 0.145     | 16           | MR Egger |             |
|                   |                           | RV - EF (%)      | 0.21 (0.11; 0.32)     | $1.0 \times 10^{-4}$   |                            | 0.076     | 17           | IVW      |             |
|                   |                           | RV - EDV (ml)    | -2.70 (-4.14; -1.26)  | $2.4 \times 10^{-4}$   |                            | 0.102     | 15           | MR Egger |             |
|                   |                           | LV - SV (ml)     | -1.57 (-2.29; -0.85)  | $2.0 \times 10^{-5}$   |                            | <0.001    | 15           | MR Egger |             |
|                   |                           | LV - PFR (ml/s)  | -3.16 (-4.53; -1.79)  | $5.9 \times 10^{-6}$   |                            | 0.010     | 17           | IVW      |             |
|                   |                           | LV - PER (ml/s)  | -3.48 (-7.41; 0.45)   | $8.3 \times 10^{-2}$   |                            | 0.031     | 15           | MR Egger |             |
|                   |                           | LV - PAFR (ml/s) | -1.83 (-3.32; -0.34)  | $1.6 \times 10^{-2}$   |                            | 0.587     | 17           | IVW      |             |
|                   |                           | LV - MVR (g/ml)  | 0.01 (0.00; 0.01)     | $1.0 \times 10^{-100}$ |                            | 0.042     | 17           | IVW      |             |
|                   |                           | LV - ESV (ml)    | -0.82 (-1.05; -0.58)  | $7.7 \times 10^{-12}$  |                            | 0.256     | 16           | IVW      |             |
|                   |                           | LV - EF (%)      | 0.20 (0.11; 0.28)     | $1.1 \times 10^{-5}$   |                            | 0.567     | 17           | IVW      |             |
|                   |                           | LV - EDV (ml)    | -0.98 (-1.35; -0.62)  | $1.2 \times 10^{-7}$   |                            | 0.002     | 16           | IVW      |             |

**Table S12:** CMR druggable proteins: MR effect estimates of plasma protein effects on sixteen CMR traits. (*continued*)

| Protein (UniProt) | Gene (ensembl)              | CMR trait            | MD (95%CI)           | P-value                | Multiple testing threshold | Q P-value | No. variants | MR model | PDTL source |
|-------------------|-----------------------------|----------------------|----------------------|------------------------|----------------------------|-----------|--------------|----------|-------------|
| ERAP2 (Q6P179)    | ERAP2 (ENSG00000164308)     | LV - EDM (g)         | 0.20 (0.01; 0.40)    | $4.3 \times 10^{-2}$   |                            | 0.050     | 17           | IVW      |             |
|                   |                             | RV - SV (ml)         | -0.17 (-0.35; 0.01)  | $6.7 \times 10^{-2}$   | $7.81 \times 10^{-6}$      | 0.002     | 45           | MR Egger | Interval    |
|                   |                             | RV - PFR (ml/s)      | -1.35 (-2.41; -0.28) | $1.3 \times 10^{-2}$   |                            | <0.001    | 42           | MR Egger |             |
|                   |                             | RV - PER (ml/s)      | -0.23 (-0.46; 0.01)  | $6.1 \times 10^{-2}$   |                            | <0.001    | 57           | IVW      |             |
|                   |                             | RV - PAFR (ml/s)     | 0.13 (-0.65; 0.90)   | $7.5 \times 10^{-1}$   |                            | <0.001    | 55           | MR Egger |             |
|                   |                             | RV - ESV (ml)        | -0.34 (-0.46; -0.23) | $1.5 \times 10^{-9}$   |                            | 0.039     | 54           | MR Egger |             |
|                   |                             | RV - EF (%)          | 0.10 (0.05; 0.15)    | $8.1 \times 10^{-5}$   |                            | <0.001    | 54           | MR Egger |             |
|                   |                             | RV - EDV (ml)        | -0.35 (-0.58; -0.12) | $2.7 \times 10^{-3}$   |                            | <0.001    | 47           | MR Egger |             |
|                   |                             | LV - SV (ml)         | -0.01 (-0.14; 0.12)  | $8.6 \times 10^{-1}$   |                            | 0.084     | 54           | MR Egger |             |
|                   |                             | LV - PFR (ml/s)      | 1.90 (1.66; 2.14)    | $1.0 \times 10^{-100}$ |                            | <0.001    | 54           | IVW      |             |
|                   |                             | LV - PER (ml/s)      | -0.10 (-0.37; 0.17)  | $4.7 \times 10^{-1}$   |                            | <0.001    | 53           | IVW      |             |
|                   |                             | LV - PAFR (ml/s)     | -0.97 (-1.88; -0.05) | $3.9 \times 10^{-2}$   |                            | 0.198     | 54           | MR Egger |             |
|                   |                             | LV - MVR (g/ml)      | 0.00 (-0.00; 0.00)   | $7.0 \times 10^{-1}$   |                            | 0.031     | 56           | MR Egger |             |
|                   |                             | LV - ESV (ml)        | -0.00 (-0.12; 0.11)  | $9.4 \times 10^{-1}$   |                            | 0.104     | 57           | MR Egger |             |
|                   |                             | LV - EF (%)          | -0.00 (-0.02; 0.02)  | $9.3 \times 10^{-1}$   |                            | 0.650     | 54           | IVW      |             |
|                   |                             | LV - EDV (ml)        | -0.27 (-0.33; -0.20) | $4.4 \times 10^{-16}$  |                            | 0.003     | 56           | IVW      |             |
| LV - EDM (g)      | -0.22 (-0.31; -0.12)        | $6.7 \times 10^{-6}$ |                      | <0.001                 | 57                         | MR Egger  |              |          |             |
| MMP9 (P14780)     | MMP9 (ENSG00000100985)      | RV - SV (ml)         | 0.09 (-0.57; 0.74)   | $8.0 \times 10^{-1}$   | $7.81 \times 10^{-6}$      | 0.583     | 6            | IVW      | Framingham  |
|                   |                             | RV - PFR (ml/s)      | 2.13 (-1.45; 5.71)   | $2.4 \times 10^{-1}$   |                            | 0.394     | 6            | IVW      |             |
|                   |                             | RV - PER (ml/s)      | -3.96 (-7.62; -0.30) | $3.4 \times 10^{-2}$   |                            | 0.470     | 6            | IVW      |             |
|                   |                             | RV - PAFR (ml/s)     | -2.59 (-7.83; 2.66)  | $3.3 \times 10^{-1}$   |                            | 0.157     | 6            | IVW      |             |
|                   |                             | RV - ESV (ml)        | 0.98 (0.21; 1.75)    | $1.3 \times 10^{-2}$   |                            | 0.256     | 6            | IVW      |             |
|                   |                             | RV - EF (%)          | -0.35 (-0.60; -0.09) | $7.5 \times 10^{-3}$   |                            | 0.890     | 6            | IVW      |             |
|                   |                             | RV - EDV (ml)        | 1.08 (-0.18; 2.35)   | $9.3 \times 10^{-2}$   |                            | 0.242     | 6            | IVW      |             |
|                   |                             | LV - SV (ml)         | 0.28 (-0.39; 0.96)   | $4.1 \times 10^{-1}$   |                            | 0.724     | 6            | IVW      |             |
|                   |                             | LV - PFR (ml/s)      | -0.84 (-4.86; 3.18)  | $6.8 \times 10^{-1}$   |                            | 0.894     | 6            | IVW      |             |
|                   |                             | LV - PER (ml/s)      | 1.33 (-2.61; 5.28)   | $5.1 \times 10^{-1}$   |                            | 0.971     | 6            | IVW      |             |
|                   |                             | LV - PAFR (ml/s)     | -2.92 (-7.31; 1.46)  | $1.9 \times 10^{-1}$   |                            | 0.667     | 6            | IVW      |             |
|                   |                             | LV - MVR (g/ml)      | -0.01 (-0.01; -0.01) | $1.4 \times 10^{-6}$   |                            | 0.974     | 6            | IVW      |             |
|                   |                             | LV - ESV (ml)        | 1.43 (0.80; 2.06)    | $7.7 \times 10^{-6}$   |                            | 0.832     | 6            | IVW      |             |
|                   |                             | LV - EF (%)          | -0.59 (-0.85; -0.34) | $5.8 \times 10^{-6}$   |                            | 0.859     | 6            | IVW      |             |
|                   |                             | LV - EDV (ml)        | 1.67 (0.60; 2.73)    | $2.2 \times 10^{-3}$   |                            | 0.725     | 6            | IVW      |             |
|                   |                             | LV - EDM (g)         | -0.40 (-0.99; 0.18)  | $1.8 \times 10^{-1}$   |                            | 0.593     | 6            | IVW      |             |
| LYAM1 (P14151)    | SELL (ENSG00000188404)      | RV - SV (ml)         | 0.08 (-0.28; 0.44)   | $6.5 \times 10^{-1}$   | $7.81 \times 10^{-6}$      | 0.014     | 35           | MR Egger | Interval    |
|                   |                             | RV - PFR (ml/s)      | -0.77 (-3.02; 1.48)  | $5.0 \times 10^{-1}$   |                            | 0.086     | 35           | MR Egger |             |
|                   |                             | RV - PER (ml/s)      | 0.86 (-1.62; 3.34)   | $5.0 \times 10^{-1}$   |                            | 0.059     | 34           | MR Egger |             |
|                   |                             | RV - PAFR (ml/s)     | 1.55 (-1.84; 4.95)   | $3.7 \times 10^{-1}$   |                            | 0.102     | 32           | MR Egger |             |
|                   |                             | RV - ESV (ml)        | 0.40 (0.26; 0.55)    | $3.2 \times 10^{-8}$   |                            | 0.542     | 34           | IVW      |             |
|                   |                             | RV - EF (%)          | 0.10 (-0.04; 0.24)   | $1.7 \times 10^{-1}$   |                            | 0.679     | 34           | MR Egger |             |
|                   |                             | RV - EDV (ml)        | -0.10 (-0.80; 0.61)  | $7.9 \times 10^{-1}$   |                            | 0.089     | 34           | MR Egger |             |
|                   |                             | LV - SV (ml)         | 0.51 (0.14; 0.88)    | $7.3 \times 10^{-3}$   |                            | 0.482     | 35           | MR Egger |             |
|                   |                             | LV - PFR (ml/s)      | 2.85 (1.67; 4.02)    | $2.1 \times 10^{-6}$   |                            | 0.050     | 32           | IVW      |             |
|                   |                             | LV - PER (ml/s)      | -0.78 (-2.96; 1.39)  | $4.8 \times 10^{-1}$   |                            | 0.467     | 35           | MR Egger |             |
|                   |                             | LV - PAFR (ml/s)     | -2.40 (-5.95; 1.15)  | $1.9 \times 10^{-1}$   |                            | 0.014     | 32           | MR Egger |             |
|                   |                             | LV - MVR (g/ml)      | 0.00 (-0.00; 0.00)   | $3.3 \times 10^{-1}$   |                            | 0.442     | 34           | MR Egger |             |
|                   |                             | LV - ESV (ml)        | -0.81 (-1.32; -0.31) | $1.6 \times 10^{-3}$   |                            | 0.065     | 33           | MR Egger |             |
|                   |                             | LV - EF (%)          | 0.36 (0.21; 0.52)    | $4.6 \times 10^{-6}$   |                            | 0.253     | 34           | MR Egger |             |
|                   |                             | LV - EDV (ml)        | 0.47 (0.19; 0.74)    | $8.2 \times 10^{-4}$   |                            | 0.005     | 31           | IVW      |             |
|                   |                             | LV - EDM (g)         | -0.16 (-0.55; 0.23)  | $4.2 \times 10^{-1}$   |                            | 0.043     | 34           | MR Egger |             |
| TR10B (O14763)    | TNFRSF10B (ENSG00000120889) | RV - SV (ml)         | 0.17 (-0.12; 0.46)   | $2.5 \times 10^{-1}$   | $7.81 \times 10^{-6}$      | 0.648     | 39           | IVW      | Scallop     |
|                   |                             | RV - PFR (ml/s)      | -4.54 (-7.87; -1.21) | $7.6 \times 10^{-3}$   |                            | 0.531     | 42           | MR Egger |             |
|                   |                             | RV - PER (ml/s)      | -1.42 (-3.36; 0.51)  | $1.5 \times 10^{-1}$   |                            | <0.001    | 36           | IVW      |             |
|                   |                             | RV - PAFR (ml/s)     | 0.63 (-1.20; 2.46)   | $5.0 \times 10^{-1}$   |                            | 0.006     | 38           | IVW      |             |
|                   |                             | RV - ESV (ml)        | 0.29 (-0.45; 1.02)   | $4.4 \times 10^{-1}$   |                            | 0.196     | 39           | MR Egger |             |
|                   |                             | RV - EF (%)          | -0.03 (-0.17; 0.11)  | $6.7 \times 10^{-1}$   |                            | 0.172     | 34           | IVW      |             |
|                   |                             | RV - EDV (ml)        | -0.17 (-1.37; 1.03)  | $7.8 \times 10^{-1}$   |                            | 0.661     | 40           | MR Egger |             |
|                   |                             | LV - SV (ml)         | -0.71 (-1.05; -0.36) | $5.9 \times 10^{-5}$   |                            | 0.070     | 39           | IVW      |             |
|                   |                             | LV - PFR (ml/s)      | -4.36 (-6.13; -2.59) | $1.4 \times 10^{-6}$   |                            | 0.008     | 39           | IVW      |             |
|                   |                             | LV - PER (ml/s)      | -2.98 (-6.93; 0.98)  | $1.4 \times 10^{-1}$   |                            | 0.278     | 42           | MR Egger |             |
|                   |                             | LV - PAFR (ml/s)     | 4.05 (2.09; 6.02)    | $5.1 \times 10^{-5}$   |                            | 0.025     | 38           | IVW      |             |
|                   |                             | LV - MVR (g/ml)      | 0.01 (0.01; 0.01)    | $1.0 \times 10^{-100}$ |                            | 0.002     | 36           | IVW      |             |
|                   |                             | LV - ESV (ml)        | -0.31 (-0.99; 0.37)  | $3.8 \times 10^{-1}$   |                            | 0.083     | 42           | MR Egger |             |

**Table S12:** CMR druggable proteins: MR effect estimates of plasma protein effects on sixteen CMR traits. (*continued*)

| Protein (uniprot) | Gene (ensembl)            | CMR trait            | MD (95%CI)            | P-value              | Multiple testing threshold | Q P-value | No. variants | MR model | POTL source |
|-------------------|---------------------------|----------------------|-----------------------|----------------------|----------------------------|-----------|--------------|----------|-------------|
| TLR4 (O00206)     | TLR4 (ENSG00000136869)    | LV - EF (%)          | -0.00 (-0.12; 0.11)   | 9.6×10 <sup>-1</sup> |                            | 0.007     | 38           | IVW      |             |
|                   |                           | LV - EDV (ml)        | -0.57 (-1.75; 0.62)   | 3.5×10 <sup>-1</sup> |                            | 0.083     | 41           | MR Egger |             |
|                   |                           | LV - EDM (g)         | 1.32 (0.65; 1.99)     | 1.1×10 <sup>-4</sup> |                            | 0.085     | 41           | MR Egger |             |
|                   |                           | RV - SV (ml)         | -0.44 (-1.07; 0.19)   | 1.7×10 <sup>-1</sup> | 7.81×10 <sup>-6</sup>      | 0.692     | 16           | MR Egger | Interval    |
|                   |                           | RV - PFR (ml/s)      | 1.51 (0.04; 2.98)     | 4.5×10 <sup>-2</sup> |                            | 0.240     | 19           | IVW      |             |
|                   |                           | RV - PER (ml/s)      | -2.09 (-6.51; 2.33)   | 3.5×10 <sup>-1</sup> |                            | 0.185     | 16           | MR Egger |             |
|                   |                           | RV - PAFR (ml/s)     | -2.48 (-4.08; -0.88)  | 2.4×10 <sup>-3</sup> |                            | 0.678     | 18           | IVW      |             |
|                   |                           | RV - ESV (ml)        | -0.91 (-1.74; -0.07)  | 3.3×10 <sup>-2</sup> |                            | 0.281     | 14           | MR Egger |             |
|                   |                           | RV - EF (%)          | -0.01 (-0.13; 0.10)   | 7.9×10 <sup>-1</sup> |                            | 0.150     | 19           | IVW      |             |
|                   |                           | RV - EDV (ml)        | -1.84 (-3.35; -0.32)  | 1.8×10 <sup>-2</sup> |                            | 0.103     | 15           | MR Egger |             |
|                   |                           | LV - SV (ml)         | -0.61 (-0.87; -0.35)  | 4.0×10 <sup>-6</sup> |                            | 0.920     | 18           | IVW      |             |
|                   |                           | LV - PFR (ml/s)      | -0.28 (-1.81; 1.26)   | 7.2×10 <sup>-1</sup> |                            | 0.447     | 19           | IVW      |             |
|                   |                           | LV - PER (ml/s)      | -5.44 (-9.37; -1.51)  | 6.7×10 <sup>-3</sup> |                            | 0.009     | 16           | MR Egger |             |
|                   |                           | LV - PAFR (ml/s)     | -2.82 (-7.30; 1.66)   | 2.2×10 <sup>-1</sup> |                            | 0.285     | 16           | MR Egger |             |
|                   |                           | LV - MVR (g/ml)      | 0.00 (-0.00; 0.00)    | 2.4×10 <sup>-1</sup> |                            | 0.065     | 18           | IVW      |             |
|                   |                           | LV - ESV (ml)        | -0.42 (-0.71; -0.14)  | 3.8×10 <sup>-3</sup> |                            | 0.104     | 19           | IVW      |             |
| LV - EF (%)       | 0.02 (-0.08; 0.11)        | 7.4×10 <sup>-1</sup> |                       | 0.015                | 19                         | IVW       |              |          |             |
| LV - EDV (ml)     | -1.06 (-1.47; -0.65)      | 3.4×10 <sup>-7</sup> |                       | 0.445                | 19                         | IVW       |              |          |             |
| LV - EDM (g)      | -0.49 (-0.75; -0.22)      | 3.1×10 <sup>-4</sup> |                       | 0.111                | 19                         | IVW       |              |          |             |
| TGFB2 (P61812)    | TGFB2 (ENSG00000092969)   | RV - SV (ml)         | 0.58 (-0.51; 1.67)    | 3.0×10 <sup>-1</sup> | 7.81×10 <sup>-6</sup>      | 0.892     | 2            | IVW      | Interval    |
|                   |                           | RV - PFR (ml/s)      | -0.87 (-6.72; 4.98)   | 7.7×10 <sup>-1</sup> |                            | 0.479     | 2            | IVW      |             |
|                   |                           | RV - PER (ml/s)      | 0.76 (-5.33; 6.85)    | 8.1×10 <sup>-1</sup> |                            | 0.419     | 2            | IVW      |             |
|                   |                           | RV - PAFR (ml/s)     | 3.74 (-3.19; 10.66)   | 2.9×10 <sup>-1</sup> |                            | 0.777     | 2            | IVW      |             |
|                   |                           | RV - ESV (ml)        | 0.79 (-0.33; 1.91)    | 1.6×10 <sup>-1</sup> |                            | 0.774     | 2            | IVW      |             |
|                   |                           | RV - EF (%)          | -0.30 (-0.72; 0.12)   | 1.7×10 <sup>-1</sup> |                            | 0.829     | 2            | IVW      |             |
|                   |                           | RV - EDV (ml)        | 1.44 (-0.37; 3.25)    | 1.2×10 <sup>-1</sup> |                            | 0.856     | 2            | IVW      |             |
|                   |                           | LV - SV (ml)         | 2.87 (1.75; 3.99)     | 4.9×10 <sup>-7</sup> |                            | 0.859     | 2            | IVW      |             |
|                   |                           | LV - PFR (ml/s)      | 2.67 (-4.03; 9.37)    | 4.3×10 <sup>-1</sup> |                            | 0.450     | 2            | IVW      |             |
|                   |                           | LV - PER (ml/s)      | 10.98 (2.74; 19.21)   | 9.0×10 <sup>-3</sup> |                            | 0.210     | 2            | IVW      |             |
|                   |                           | LV - PAFR (ml/s)     | -2.27 (-9.57; 5.04)   | 5.4×10 <sup>-1</sup> |                            | 0.958     | 2            | IVW      |             |
|                   |                           | LV - MVR (g/ml)      | -0.01 (-0.01; 0.00)   | 7.0×10 <sup>-2</sup> |                            | 0.647     | 2            | IVW      |             |
|                   |                           | LV - ESV (ml)        | 1.19 (0.15; 2.24)     | 2.5×10 <sup>-2</sup> |                            | 0.963     | 2            | IVW      |             |
|                   |                           | LV - EF (%)          | 0.46 (0.04; 0.89)     | 3.4×10 <sup>-2</sup> |                            | 0.759     | 2            | IVW      |             |
|                   |                           | LV - EDV (ml)        | 4.06 (2.28; 5.84)     | 7.6×10 <sup>-6</sup> |                            | 0.879     | 2            | IVW      |             |
|                   |                           | LV - EDM (g)         | 1.61 (0.63; 2.58)     | 1.2×10 <sup>-3</sup> |                            | 0.548     | 2            | IVW      |             |
| PD1L2 (Q98Q51)    | PDCD1L2 (ENSG00000197646) | RV - SV (ml)         | -0.16 (-0.83; 0.51)   | 6.3×10 <sup>-1</sup> | 7.81×10 <sup>-6</sup>      | 0.556     | 33           | MR Egger | Interval    |
|                   |                           | RV - PFR (ml/s)      | -1.65 (-5.25; 1.95)   | 3.7×10 <sup>-1</sup> |                            | 0.747     | 33           | MR Egger |             |
|                   |                           | RV - PER (ml/s)      | -1.49 (-5.82; 2.85)   | 5.0×10 <sup>-1</sup> |                            | 0.102     | 32           | MR Egger |             |
|                   |                           | RV - PAFR (ml/s)     | 4.74 (0.29; 9.19)     | 3.7×10 <sup>-2</sup> |                            | 0.327     | 33           | MR Egger |             |
|                   |                           | RV - ESV (ml)        | -0.10 (-0.33; 0.13)   | 3.8×10 <sup>-1</sup> |                            | 0.083     | 30           | IVW      |             |
|                   |                           | RV - EF (%)          | -0.13 (-0.42; 0.15)   | 3.7×10 <sup>-1</sup> |                            | 0.206     | 33           | MR Egger |             |
|                   |                           | RV - EDV (ml)        | 0.08 (-1.18; 1.34)    | 9.0×10 <sup>-1</sup> |                            | 0.139     | 33           | MR Egger |             |
|                   |                           | LV - SV (ml)         | -0.43 (-0.62; -0.24)  | 6.6×10 <sup>-6</sup> |                            | 0.748     | 32           | IVW      |             |
|                   |                           | LV - PFR (ml/s)      | -2.09 (-6.20; 2.02)   | 3.2×10 <sup>-1</sup> |                            | 0.917     | 33           | MR Egger |             |
|                   |                           | LV - PER (ml/s)      | 1.20 (-2.84; 5.23)    | 5.6×10 <sup>-1</sup> |                            | 0.812     | 33           | MR Egger |             |
|                   |                           | LV - PAFR (ml/s)     | 3.21 (-1.67; 8.09)    | 2.0×10 <sup>-1</sup> |                            | 0.220     | 33           | MR Egger |             |
|                   |                           | LV - MVR (g/ml)      | 0.00 (-0.00; 0.01)    | 3.2×10 <sup>-1</sup> |                            | 0.891     | 33           | MR Egger |             |
|                   |                           | LV - ESV (ml)        | -0.45 (-0.66; -0.23)  | 3.8×10 <sup>-5</sup> |                            | 0.087     | 30           | IVW      |             |
|                   |                           | LV - EF (%)          | 0.12 (0.03; 0.21)     | 5.8×10 <sup>-3</sup> |                            | 0.091     | 30           | IVW      |             |
|                   |                           | LV - EDV (ml)        | -0.78 (-1.10; -0.47)  | 9.6×10 <sup>-7</sup> |                            | 0.298     | 32           | IVW      |             |
|                   |                           | LV - EDM (g)         | -0.17 (-0.34; -0.01)  | 4.1×10 <sup>-2</sup> |                            | 0.531     | 30           | IVW      |             |
| MK03 (P27361)     | MAPK3 (ENSG00000102882)   | RV - SV (ml)         | -0.48 (-1.43; 0.46)   | 3.2×10 <sup>-1</sup> | 7.81×10 <sup>-6</sup>      | 0.136     | 5            | IVW      | Interval    |
|                   |                           | RV - PFR (ml/s)      | 5.06 (1.23; 8.88)     | 9.6×10 <sup>-3</sup> |                            | 0.510     | 5            | IVW      |             |
|                   |                           | RV - PER (ml/s)      | 2.72 (-1.27; 6.70)    | 1.8×10 <sup>-1</sup> |                            | 0.597     | 5            | IVW      |             |
|                   |                           | RV - PAFR (ml/s)     | -6.10 (-10.63; -1.58) | 8.2×10 <sup>-3</sup> |                            | 0.945     | 5            | IVW      |             |
|                   |                           | RV - ESV (ml)        | -2.07 (-2.80; -1.34)  | 3.0×10 <sup>-8</sup> |                            | 0.563     | 5            | IVW      |             |
|                   |                           | RV - EF (%)          | 0.75 (0.47; 1.02)     | 1.3×10 <sup>-7</sup> |                            | 0.027     | 5            | IVW      |             |
|                   |                           | RV - EDV (ml)        | -2.43 (-3.61; -1.24)  | 6.0×10 <sup>-5</sup> |                            | 0.960     | 5            | IVW      |             |
|                   |                           | LV - SV (ml)         | -0.46 (-1.25; 0.34)   | 2.6×10 <sup>-1</sup> |                            | 0.320     | 5            | IVW      |             |
|                   |                           | LV - PFR (ml/s)      | 3.59 (-0.78; 7.96)    | 1.1×10 <sup>-1</sup> |                            | 0.460     | 5            | IVW      |             |
|                   |                           | LV - PER (ml/s)      | 46.63 (19.37; 73.89)  | 8.0×10 <sup>-4</sup> |                            | 0.773     | 5            | MR Egger |             |
| LV - PAFR (ml/s)  | 6.31 (1.54; 11.08)        | 9.5×10 <sup>-3</sup> |                       | 0.430                | 5                          | IVW       |              |          |             |

**Table S12:** CMR druggable proteins: MR effect estimates of plasma protein effects on sixteen CMR traits. (*continued*)

| Protein (uniprot) | Gene (ensembl)          | CMR trait        | MD (95%CI)             | P-value              | Multiple testing threshold | Q P-value | No. variants | MR model | PDTL source |
|-------------------|-------------------------|------------------|------------------------|----------------------|----------------------------|-----------|--------------|----------|-------------|
|                   |                         | LV - MVR (g/ml)  | 0.01 (0.00; 0.01)      | $3.6 \times 10^{-4}$ |                            | 0.287     | 5            | IVW      |             |
|                   |                         | LV - ESV (ml)    | 2.77 (-1.56; 7.10)     | $2.1 \times 10^{-1}$ |                            | 0.846     | 5            | MR Egger |             |
|                   |                         | LV - EF (%)      | 0.43 (0.15; 0.71)      | $2.5 \times 10^{-3}$ |                            | 0.709     | 5            | IVW      |             |
|                   |                         | LV - EDV (ml)    | 3.66 (-3.71; 11.04)    | $3.3 \times 10^{-1}$ |                            | 0.791     | 5            | MR Egger |             |
|                   |                         | LV - EDM (g)     | -0.05 (-0.68; 0.59)    | $8.9 \times 10^{-1}$ |                            | 0.689     | 5            | IVW      |             |
| MFGM (Q08431)     | MFGE8 (ENSG00000140545) | RV - SV (ml)     | 0.11 (-0.20; 0.42)     | $4.9 \times 10^{-1}$ | $7.81 \times 10^{-6}$      | 0.359     | 12           | IVW      | Interval    |
|                   |                         | RV - PFR (ml/s)  | 4.27 (2.67; 5.86)      | $1.6 \times 10^{-7}$ |                            | 0.934     | 12           | IVW      |             |
|                   |                         | RV - PER (ml/s)  | -0.54 (-2.60; 1.53)    | $6.1 \times 10^{-1}$ |                            | 0.106     | 12           | IVW      |             |
|                   |                         | RV - PAFR (ml/s) | 5.80 (3.91; 7.68)      | $1.7 \times 10^{-9}$ |                            | 0.563     | 12           | IVW      |             |
|                   |                         | RV - ESV (ml)    | 0.56 (-1.69; 2.82)     | $6.2 \times 10^{-1}$ |                            | 0.706     | 12           | MR Egger |             |
|                   |                         | RV - EF (%)      | -0.04 (-0.17; 0.10)    | $6.0 \times 10^{-1}$ |                            | 0.223     | 12           | IVW      |             |
|                   |                         | RV - EDV (ml)    | 0.34 (-0.15; 0.84)     | $1.7 \times 10^{-1}$ |                            | 0.615     | 12           | IVW      |             |
|                   |                         | LV - SV (ml)     | 0.28 (-0.02; 0.59)     | $7.1 \times 10^{-2}$ |                            | 0.662     | 12           | IVW      |             |
|                   |                         | LV - PFR (ml/s)  | -6.32 (-19.79; 7.15)   | $3.6 \times 10^{-1}$ |                            | 0.468     | 12           | MR Egger |             |
|                   |                         | LV - PER (ml/s)  | -7.16 (-20.39; 6.06)   | $2.9 \times 10^{-1}$ |                            | 0.868     | 12           | MR Egger |             |
|                   |                         | LV - PAFR (ml/s) | 1.56 (-0.61; 3.73)     | $1.6 \times 10^{-1}$ |                            | 0.284     | 12           | IVW      |             |
|                   |                         | LV - MVR (g/ml)  | 0.00 (-0.00; 0.00)     | $8.3 \times 10^{-1}$ |                            | 0.879     | 12           | IVW      |             |
|                   |                         | LV - ESV (ml)    | -0.75 (-2.85; 1.36)    | $4.9 \times 10^{-1}$ |                            | 0.797     | 12           | MR Egger |             |
|                   |                         | LV - EF (%)      | -0.28 (-1.25; 0.70)    | $5.8 \times 10^{-1}$ |                            | 0.238     | 12           | MR Egger |             |
|                   |                         | LV - EDV (ml)    | -2.24 (-5.82; 1.34)    | $2.2 \times 10^{-1}$ |                            | 0.870     | 12           | MR Egger |             |
|                   |                         | LV - EDM (g)     | -2.24 (-4.20; -0.28)   | $2.5 \times 10^{-2}$ |                            | 0.884     | 12           | MR Egger |             |
| IL8 (P10145)      | IL8 (ENSG00000169429)   | RV - SV (ml)     | 1.99 (0.93; 3.05)      | $2.4 \times 10^{-4}$ | $7.81 \times 10^{-6}$      | 0.271     | 4            | IVW      | Scallop     |
|                   |                         | RV - PFR (ml/s)  | 9.25 (4.27; 14.23)     | $2.7 \times 10^{-4}$ |                            | 0.581     | 4            | IVW      |             |
|                   |                         | RV - PER (ml/s)  | 12.63 (7.45; 17.81)    | $1.8 \times 10^{-6}$ |                            | 0.047     | 4            | IVW      |             |
|                   |                         | RV - PAFR (ml/s) | -12.19 (-18.22; -6.16) | $7.4 \times 10^{-5}$ |                            | 0.369     | 4            | IVW      |             |
|                   |                         | RV - ESV (ml)    | 0.35 (-0.60; 1.30)     | $4.8 \times 10^{-1}$ |                            | 0.923     | 4            | IVW      |             |
|                   |                         | RV - EF (%)      | 0.29 (-0.18; 0.76)     | $2.3 \times 10^{-1}$ |                            | 0.161     | 4            | IVW      |             |
|                   |                         | RV - EDV (ml)    | 2.47 (0.93; 4.01)      | $1.7 \times 10^{-3}$ |                            | 0.753     | 4            | IVW      |             |
|                   |                         | LV - SV (ml)     | 1.48 (0.41; 2.56)      | $6.9 \times 10^{-3}$ |                            | 0.279     | 4            | IVW      |             |
|                   |                         | LV - PFR (ml/s)  | 3.86 (-1.83; 9.55)     | $1.8 \times 10^{-1}$ |                            | 0.878     | 4            | IVW      |             |
|                   |                         | LV - PER (ml/s)  | 3.84 (-1.75; 9.43)     | $1.8 \times 10^{-1}$ |                            | 0.898     | 4            | IVW      |             |
|                   |                         | LV - PAFR (ml/s) | -5.87 (-12.80; 1.06)   | $9.7 \times 10^{-2}$ |                            | 0.291     | 4            | IVW      |             |
|                   |                         | LV - MVR (g/ml)  | 0.01 (0.01; 0.02)      | $3.3 \times 10^{-5}$ |                            | 0.838     | 4            | IVW      |             |
|                   |                         | LV - ESV (ml)    | 0.15 (-0.74; 1.04)     | $7.4 \times 10^{-1}$ |                            | 0.651     | 4            | IVW      |             |
|                   |                         | LV - EF (%)      | 0.04 (-0.49; 0.58)     | $8.7 \times 10^{-1}$ |                            | 0.091     | 4            | IVW      |             |
|                   |                         | LV - EDV (ml)    | 1.32 (-0.19; 2.83)     | $8.6 \times 10^{-2}$ |                            | 0.886     | 4            | IVW      |             |
|                   |                         | LV - EDM (g)     | 2.34 (1.51; 3.16)      | $3.1 \times 10^{-8}$ |                            | 0.768     | 4            | IVW      |             |
| ERAP1 (Q9NZ08)    | ERAP1 (ENSG00000164307) | RV - SV (ml)     | -0.13 (-0.25; -0.00)   | $4.3 \times 10^{-2}$ | $7.81 \times 10^{-6}$      | <0.001    | 50           | MR Egger | Interval    |
|                   |                         | RV - PFR (ml/s)  | 0.02 (-0.67; 0.70)     | $9.6 \times 10^{-1}$ |                            | <0.001    | 49           | MR Egger |             |
|                   |                         | RV - PER (ml/s)  | 0.66 (0.40; 0.93)      | $9.7 \times 10^{-7}$ |                            | 0.233     | 61           | IVW      |             |
|                   |                         | RV - PAFR (ml/s) | -0.65 (-0.95; -0.35)   | $2.5 \times 10^{-5}$ |                            | 0.050     | 64           | IVW      |             |
|                   |                         | RV - ESV (ml)    | 0.12 (0.01; 0.23)      | $3.0 \times 10^{-2}$ |                            | 0.007     | 62           | MR Egger |             |
|                   |                         | RV - EF (%)      | -0.05 (-0.08; -0.02)   | $3.2 \times 10^{-3}$ |                            | <0.001    | 50           | IVW      |             |
|                   |                         | RV - EDV (ml)    | -0.05 (-0.15; 0.05)    | $3.6 \times 10^{-1}$ |                            | <0.001    | 50           | IVW      |             |
|                   |                         | LV - SV (ml)     | 0.03 (-0.02; 0.08)     | $2.9 \times 10^{-1}$ |                            | <0.001    | 59           | IVW      |             |
|                   |                         | LV - PFR (ml/s)  | -1.61 (-2.39; -0.83)   | $4.9 \times 10^{-5}$ |                            | <0.001    | 49           | MR Egger |             |
|                   |                         | LV - PER (ml/s)  | 0.48 (0.21; 0.75)      | $4.0 \times 10^{-4}$ |                            | <0.001    | 61           | IVW      |             |
|                   |                         | LV - PAFR (ml/s) | 0.18 (-0.56; 0.92)     | $6.3 \times 10^{-1}$ |                            | <0.001    | 58           | MR Egger |             |
|                   |                         | LV - MVR (g/ml)  | -0.00 (-0.00; -0.00)   | $8.0 \times 10^{-8}$ |                            | 0.011     | 64           | MR Egger |             |
|                   |                         | LV - ESV (ml)    | 0.09 (0.04; 0.13)      | $8.5 \times 10^{-5}$ |                            | 0.003     | 61           | IVW      |             |
|                   |                         | LV - EF (%)      | 0.01 (-0.03; 0.04)     | $5.9 \times 10^{-1}$ |                            | 0.008     | 65           | MR Egger |             |
|                   |                         | LV - EDV (ml)    | 0.09 (0.01; 0.17)      | $1.9 \times 10^{-2}$ |                            | 0.023     | 58           | IVW      |             |
|                   |                         | LV - EDM (g)     | -0.07 (-0.11; -0.03)   | $2.8 \times 10^{-4}$ |                            | 0.027     | 61           | IVW      |             |
| PMEL (P40967)     | PMEL (ENSG00000185664)  | RV - SV (ml)     | -0.09 (-1.06; 0.88)    | $8.5 \times 10^{-1}$ | $7.81 \times 10^{-6}$      | 0.716     | 2            | IVW      | Interval    |
|                   |                         | RV - PFR (ml/s)  | -11.98 (-17.19; -6.77) | $6.6 \times 10^{-6}$ |                            | 0.890     | 2            | IVW      |             |
|                   |                         | RV - PER (ml/s)  | -5.36 (-10.78; 0.07)   | $5.3 \times 10^{-2}$ |                            | 0.764     | 2            | IVW      |             |
|                   |                         | RV - PAFR (ml/s) | 5.74 (-0.42; 11.90)    | $6.8 \times 10^{-2}$ |                            | 0.747     | 2            | IVW      |             |
|                   |                         | RV - ESV (ml)    | -0.67 (-1.67; 0.32)    | $1.8 \times 10^{-1}$ |                            | 0.654     | 2            | IVW      |             |
|                   |                         | RV - EF (%)      | 0.14 (-0.24; 0.52)     | $4.7 \times 10^{-1}$ |                            | 0.633     | 2            | IVW      |             |
|                   |                         | RV - EDV (ml)    | -0.56 (-2.17; 1.06)    | $5.0 \times 10^{-1}$ |                            | 0.855     | 2            | IVW      |             |
|                   |                         | LV - SV (ml)     | -0.23 (-1.23; 0.76)    | $6.5 \times 10^{-1}$ |                            | 0.933     | 2            | IVW      |             |
|                   |                         | LV - PFR (ml/s)  | -2.12 (-8.08; 3.84)    | $4.9 \times 10^{-1}$ |                            | 0.777     | 2            | IVW      |             |

**Table S12:** CMR druggable proteins: MR effect estimates of plasma protein effects on sixteen CMR traits. (*continued*)

| Protein (uniprot) | Gene (ensembl)           | CMR trait        | MD (95%CI)            | P-value               | Multiple testing threshold | Q P-value | No. variants | MR model | PDTL source |
|-------------------|--------------------------|------------------|-----------------------|-----------------------|----------------------------|-----------|--------------|----------|-------------|
|                   |                          | LV - PER (ml/s)  | -6.92 (-12.77; -1.07) | 2.1×10 <sup>-2</sup>  |                            | 0.891     | 2            | IVW      |             |
|                   |                          | LV - PAFR (ml/s) | 10.26 (3.76; 16.77)   | 2.0×10 <sup>-3</sup>  |                            | 0.942     | 2            | IVW      |             |
|                   |                          | LV - MVR (g/ml)  | 0.00 (-0.00; 0.01)    | 6.5×10 <sup>-1</sup>  |                            | 0.815     | 2            | IVW      |             |
|                   |                          | LV - ESV (ml)    | -1.57 (-2.50; -0.64)  | 9.4×10 <sup>-4</sup>  |                            | 0.914     | 2            | IVW      |             |
|                   |                          | LV - EF (%)      | 0.46 (0.07; 0.84)     | 1.9×10 <sup>-2</sup>  |                            | 0.879     | 2            | IVW      |             |
|                   |                          | LV - EDV (ml)    | -1.86 (-3.44; -0.27)  | 2.2×10 <sup>-2</sup>  |                            | 0.899     | 2            | IVW      |             |
|                   |                          | LV - EDM (g)     | -0.80 (-1.67; 0.06)   | 6.8×10 <sup>-2</sup>  |                            | 0.695     | 2            | IVW      |             |
| ICOSL (O75144)    | ICOSLG (ENSG00000160223) | RV - SV (ml)     | -0.07 (-0.66; 0.52)   | 8.2×10 <sup>-1</sup>  | 7.81×10 <sup>-6</sup>      | 0.295     | 37           | MR Egger | Interval    |
|                   |                          | RV - PFR (ml/s)  | 2.65 (-0.19; 5.49)    | 6.8×10 <sup>-2</sup>  |                            | <0.001    | 40           | MR Egger |             |
|                   |                          | RV - PER (ml/s)  | 4.38 (1.27; 7.48)     | 5.8×10 <sup>-3</sup>  |                            | 0.028     | 36           | MR Egger |             |
|                   |                          | RV - PAFR (ml/s) | -4.66 (-8.02; -1.30)  | 6.5×10 <sup>-3</sup>  |                            | 0.661     | 40           | MR Egger |             |
|                   |                          | RV - ESV (ml)    | 0.34 (-0.22; 0.90)    | 2.3×10 <sup>-1</sup>  |                            | 0.047     | 37           | MR Egger |             |
|                   |                          | RV - EF (%)      | 0.03 (-0.19; 0.26)    | 7.7×10 <sup>-1</sup>  |                            | 0.413     | 38           | MR Egger |             |
|                   |                          | RV - EDV (ml)    | 0.31 (-0.60; 1.22)    | 5.1×10 <sup>-1</sup>  |                            | 0.452     | 38           | MR Egger |             |
|                   |                          | LV - SV (ml)     | 0.31 (-0.29; 0.91)    | 3.1×10 <sup>-1</sup>  |                            | 0.170     | 40           | MR Egger |             |
|                   |                          | LV - PFR (ml/s)  | -0.41 (-3.66; 2.84)   | 8.1×10 <sup>-1</sup>  |                            | 0.017     | 40           | MR Egger |             |
|                   |                          | LV - PER (ml/s)  | 1.13 (-2.06; 4.32)    | 4.9×10 <sup>-1</sup>  |                            | 0.532     | 40           | MR Egger |             |
|                   |                          | LV - PAFR (ml/s) | -1.60 (-5.14; 1.95)   | 3.8×10 <sup>-1</sup>  |                            | 0.816     | 40           | MR Egger |             |
|                   |                          | LV - MVR (g/ml)  | -0.00 (-0.00; -0.00)  | 9.2×10 <sup>-14</sup> |                            | 0.222     | 42           | IVW      |             |
|                   |                          | LV - ESV (ml)    | -0.45 (-0.97; 0.07)   | 9.1×10 <sup>-2</sup>  |                            | <0.001    | 36           | MR Egger |             |
|                   |                          | LV - EF (%)      | 0.24 (0.03; 0.45)     | 2.8×10 <sup>-2</sup>  |                            | 0.038     | 37           | MR Egger |             |
|                   |                          | LV - EDV (ml)    | 0.06 (-0.82; 0.94)    | 9.0×10 <sup>-1</sup>  |                            | <0.001    | 39           | MR Egger |             |
|                   |                          | LV - EDM (g)     | -0.28 (-0.80; 0.25)   | 3.0×10 <sup>-1</sup>  |                            | 0.154     | 40           | MR Egger |             |
| GFRA1 (P56159)    | GFRA1 (ENSG00000151892)  | RV - SV (ml)     | 0.19 (-0.28; 0.65)    | 4.3×10 <sup>-1</sup>  | 7.81×10 <sup>-6</sup>      | 0.933     | 12           | IVW      | Interval    |
|                   |                          | RV - PFR (ml/s)  | 2.06 (-0.42; 4.55)    | 1.0×10 <sup>-1</sup>  |                            | 0.451     | 12           | IVW      |             |
|                   |                          | RV - PER (ml/s)  | -0.42 (-2.86; 2.03)   | 7.4×10 <sup>-1</sup>  |                            | 0.893     | 12           | IVW      |             |
|                   |                          | RV - PAFR (ml/s) | -4.04 (-6.82; -1.27)  | 4.3×10 <sup>-3</sup>  |                            | 0.998     | 13           | IVW      |             |
|                   |                          | RV - ESV (ml)    | 0.47 (-0.06; 1.00)    | 8.2×10 <sup>-2</sup>  |                            | 0.020     | 11           | IVW      |             |
|                   |                          | RV - EF (%)      | -0.05 (-0.24; 0.13)   | 5.7×10 <sup>-1</sup>  |                            | 0.298     | 12           | IVW      |             |
|                   |                          | RV - EDV (ml)    | 0.61 (-0.42; 1.64)    | 2.5×10 <sup>-1</sup>  |                            | 0.155     | 11           | IVW      |             |
|                   |                          | LV - SV (ml)     | 0.07 (-0.46; 0.60)    | 7.8×10 <sup>-1</sup>  |                            | 0.540     | 11           | IVW      |             |
|                   |                          | LV - PFR (ml/s)  | 4.79 (1.32; 8.26)     | 6.9×10 <sup>-3</sup>  |                            | 0.128     | 12           | IVW      |             |
|                   |                          | LV - PER (ml/s)  | -0.64 (-3.75; 2.47)   | 6.9×10 <sup>-1</sup>  |                            | 0.484     | 11           | IVW      |             |
|                   |                          | LV - PAFR (ml/s) | -1.73 (-4.93; 1.46)   | 2.9×10 <sup>-1</sup>  |                            | 0.390     | 12           | IVW      |             |
|                   |                          | LV - MVR (g/ml)  | -0.01 (-0.01; -0.00)  | 4.0×10 <sup>-6</sup>  |                            | 0.506     | 10           | IVW      |             |
|                   |                          | LV - ESV (ml)    | 0.50 (-0.00; 0.99)    | 5.2×10 <sup>-2</sup>  |                            | 0.420     | 10           | IVW      |             |
|                   |                          | LV - EF (%)      | -0.18 (-0.35; -0.01)  | 3.7×10 <sup>-2</sup>  |                            | 0.613     | 13           | IVW      |             |
|                   |                          | LV - EDV (ml)    | 0.71 (-0.13; 1.55)    | 9.7×10 <sup>-2</sup>  |                            | 0.824     | 10           | IVW      |             |
|                   |                          | LV - EDM (g)     | -0.60 (-1.01; -0.18)  | 4.6×10 <sup>-3</sup>  |                            | 0.920     | 12           | IVW      |             |
| FCER2 (P06734)    | FCER2 (ENSG00000104921)  | RV - SV (ml)     | -0.70 (-1.43; 0.02)   | 5.8×10 <sup>-2</sup>  | 7.81×10 <sup>-6</sup>      | 0.991     | 26           | MR Egger | Interval    |
|                   |                          | RV - PFR (ml/s)  | -2.49 (-6.40; 1.42)   | 2.1×10 <sup>-1</sup>  |                            | 0.814     | 26           | MR Egger |             |
|                   |                          | RV - PER (ml/s)  | -3.19 (-7.26; 0.88)   | 1.2×10 <sup>-1</sup>  |                            | 0.679     | 26           | MR Egger |             |
|                   |                          | RV - PAFR (ml/s) | -3.64 (-8.26; 0.98)   | 1.2×10 <sup>-1</sup>  |                            | 0.466     | 26           | MR Egger |             |
|                   |                          | RV - ESV (ml)    | -0.24 (-1.04; 0.57)   | 5.7×10 <sup>-1</sup>  |                            | 0.269     | 26           | MR Egger |             |
|                   |                          | RV - EF (%)      | -0.13 (-0.41; 0.15)   | 3.6×10 <sup>-1</sup>  |                            | 0.598     | 26           | MR Egger |             |
|                   |                          | RV - EDV (ml)    | -0.89 (-2.10; 0.32)   | 1.5×10 <sup>-1</sup>  |                            | 0.708     | 26           | MR Egger |             |
|                   |                          | LV - SV (ml)     | -0.27 (-1.02; 0.48)   | 4.8×10 <sup>-1</sup>  |                            | 0.919     | 26           | MR Egger |             |
|                   |                          | LV - PFR (ml/s)  | -3.89 (-8.36; 0.59)   | 8.8×10 <sup>-2</sup>  |                            | 0.735     | 26           | MR Egger |             |
|                   |                          | LV - PER (ml/s)  | -3.66 (-8.05; 0.73)   | 1.0×10 <sup>-1</sup>  |                            | 0.960     | 26           | MR Egger |             |
|                   |                          | LV - PAFR (ml/s) | -1.93 (-6.95; 3.08)   | 4.5×10 <sup>-1</sup>  |                            | 0.385     | 26           | MR Egger |             |
|                   |                          | LV - MVR (g/ml)  | -0.00 (-0.01; 0.00)   | 2.1×10 <sup>-1</sup>  |                            | 0.575     | 26           | MR Egger |             |
|                   |                          | LV - ESV (ml)    | -0.35 (-0.56; -0.14)  | 1.0×10 <sup>-3</sup>  |                            | 0.026     | 24           | IVW      |             |
|                   |                          | LV - EF (%)      | -0.05 (-0.13; 0.04)   | 2.8×10 <sup>-1</sup>  |                            | 0.332     | 24           | IVW      |             |
|                   |                          | LV - EDV (ml)    | -0.93 (-2.12; 0.26)   | 1.2×10 <sup>-1</sup>  |                            | 0.656     | 26           | MR Egger |             |
|                   |                          | LV - EDM (g)     | -0.62 (-0.89; -0.36)  | 2.8×10 <sup>-6</sup>  |                            | 0.217     | 20           | IVW      |             |
| DKK1 (O94907)     | DKK1 (ENSG00000107984)   | RV - SV (ml)     | -0.20 (-1.31; 0.91)   | 7.3×10 <sup>-1</sup>  | 7.81×10 <sup>-6</sup>      | 0.484     | 9            | IVW      | Scallop     |
|                   |                          | RV - PFR (ml/s)  | 16.29 (10.33; 22.24)  | 8.3×10 <sup>-8</sup>  |                            | 0.600     | 9            | IVW      |             |
|                   |                          | RV - PER (ml/s)  | -3.57 (-9.77; 2.63)   | 2.6×10 <sup>-1</sup>  |                            | 0.961     | 9            | IVW      |             |
|                   |                          | RV - PAFR (ml/s) | -6.24 (-13.72; 1.24)  | 1.0×10 <sup>-1</sup>  |                            | 0.340     | 9            | IVW      |             |
|                   |                          | RV - ESV (ml)    | -2.08 (-3.22; -0.94)  | 3.4×10 <sup>-4</sup>  |                            | 0.736     | 9            | IVW      |             |
|                   |                          | RV - EF (%)      | 0.58 (0.09; 1.06)     | 1.9×10 <sup>-2</sup>  |                            | 0.265     | 9            | IVW      |             |
|                   |                          | RV - EDV (ml)    | -2.35 (-4.19; -0.50)  | 1.3×10 <sup>-2</sup>  |                            | 0.755     | 9            | IVW      |             |



**Table S12:** CMR druggable proteins: MR effect estimates of plasma protein effects on sixteen CMR traits. (*continued*)

| Protein (uniprot) | Gene (ensembl)          | CMR trait        | MD (95%CI)            | P-value              | Multiple testing threshold | Q P-value | No. variants | MR model | POTL source |
|-------------------|-------------------------|------------------|-----------------------|----------------------|----------------------------|-----------|--------------|----------|-------------|
|                   |                         | LV - SV (ml)     | -1.26 (-2.47; -0.05)  | 4.2×10 <sup>-2</sup> |                            | 0.332     | 9            | IVW      |             |
|                   |                         | LV - PFR (ml/s)  | 7.62 (-0.04; 15.29)   | 5.1×10 <sup>-2</sup> |                            | 0.254     | 9            | IVW      |             |
|                   |                         | LV - PER (ml/s)  | 4.16 (-4.18; 12.51)   | 3.3×10 <sup>-1</sup> |                            | 0.131     | 9            | IVW      |             |
|                   |                         | LV - PAFR (ml/s) | -0.25 (-7.67; 7.18)   | 9.5×10 <sup>-1</sup> |                            | 0.793     | 9            | IVW      |             |
|                   |                         | LV - MVR (g/ml)  | 0.01 (0.01; 0.02)     | 3.8×10 <sup>-5</sup> |                            | 0.433     | 9            | IVW      |             |
|                   |                         | LV - ESV (ml)    | -1.98 (-3.21; -0.75)  | 1.6×10 <sup>-3</sup> |                            | 0.217     | 9            | IVW      |             |
|                   |                         | LV - EF (%)      | 0.63 (0.13; 1.12)     | 1.3×10 <sup>-2</sup> |                            | 0.248     | 9            | IVW      |             |
|                   |                         | LV - EDV (ml)    | -3.23 (-5.15; -1.31)  | 9.8×10 <sup>-4</sup> |                            | 0.339     | 9            | IVW      |             |
|                   |                         | LV - EDM (g)     | -0.22 (-1.21; 0.77)   | 6.6×10 <sup>-1</sup> |                            | 0.586     | 9            | IVW      |             |
| CASP8 (Q14790)    | CASP8 (ENSG00000064012) | RV - SV (ml)     | 0.15 (-2.84; 3.14)    | 9.2×10 <sup>-1</sup> | 7.81×10 <sup>-6</sup>      | 0.416     | 9            | MR Egger | Scallop     |
|                   |                         | RV - PFR (ml/s)  | 13.28 (7.55; 19.01)   | 5.5×10 <sup>-6</sup> |                            | 0.824     | 9            | IVW      |             |
|                   |                         | RV - PER (ml/s)  | -3.51 (-9.47; 2.45)   | 2.5×10 <sup>-1</sup> |                            | 0.670     | 9            | IVW      |             |
|                   |                         | RV - PAFR (ml/s) | -6.99 (-13.76; -0.21) | 4.3×10 <sup>-2</sup> |                            | 0.908     | 9            | IVW      |             |
|                   |                         | RV - ESV (ml)    | -0.48 (-1.86; 0.91)   | 5.0×10 <sup>-1</sup> |                            | 0.120     | 9            | IVW      |             |
|                   |                         | RV - EF (%)      | 0.11 (-0.36; 0.58)    | 6.5×10 <sup>-1</sup> |                            | 0.688     | 8            | IVW      |             |
|                   |                         | RV - EDV (ml)    | 0.36 (-1.45; 2.18)    | 6.9×10 <sup>-1</sup> |                            | 0.398     | 9            | IVW      |             |
|                   |                         | LV - SV (ml)     | 0.12 (-1.02; 1.27)    | 8.3×10 <sup>-1</sup> |                            | 0.361     | 9            | IVW      |             |
|                   |                         | LV - PFR (ml/s)  | 9.46 (2.52; 16.40)    | 7.6×10 <sup>-3</sup> |                            | 0.345     | 9            | IVW      |             |
|                   |                         | LV - PER (ml/s)  | 2.09 (-4.35; 8.53)    | 5.2×10 <sup>-1</sup> |                            | 0.789     | 9            | IVW      |             |
|                   |                         | LV - PAFR (ml/s) | -5.94 (-13.09; 1.22)  | 1.0×10 <sup>-1</sup> |                            | 0.684     | 9            | IVW      |             |
|                   |                         | LV - MVR (g/ml)  | -0.01 (-0.01; -0.00)  | 1.3×10 <sup>-2</sup> |                            | 0.839     | 9            | IVW      |             |
|                   |                         | LV - ESV (ml)    | 1.40 (-1.53; 4.33)    | 3.5×10 <sup>-1</sup> |                            | 0.384     | 9            | MR Egger |             |
|                   |                         | LV - EF (%)      | -0.45 (-1.62; 0.71)   | 4.5×10 <sup>-1</sup> |                            | 0.897     | 9            | MR Egger |             |
|                   |                         | LV - EDV (ml)    | -1.43 (-3.55; 0.68)   | 1.8×10 <sup>-1</sup> |                            | 0.159     | 9            | IVW      |             |
|                   |                         | LV - EDM (g)     | 0.55 (-2.24; 3.35)    | 7.0×10 <sup>-1</sup> |                            | 0.351     | 9            | MR Egger |             |

*General:*  
CMR: Cardiac MRI, MR: Mendelian randomization, MD: mean difference, CI: confidence interval. Effect estimates are coded towards protein and CMR increasing directions.

**Table S13:** Annotating the set of directionally concordant CMR proteins.

| Protein (uniprot) | Gene (ensembl)            | mRNA Tissue specificity | Above average mRNA expression                             | Druggability  | Nearest druggable prot. | Prot. distance |
|-------------------|---------------------------|-------------------------|-----------------------------------------------------------|---------------|-------------------------|----------------|
| TDGF1 (P13385)    | TDGF1 (ENSG00000241186)   | 0.925                   | Kidney, Ovary, Spleen                                     | Druggable     |                         |                |
| OSMR (Q99650)     | OSMR (ENSG00000145623)    | 0.693                   | Adipose tissue, Placenta, Urinary bladder, Vagina         | Not druggable | ADRM1 (Q16186)          | 2              |
|                   |                           |                         |                                                           |               | FA10 (P00742)           | 2              |
|                   |                           |                         |                                                           |               | S39A6 (Q13433)          | 2              |
|                   |                           |                         |                                                           |               | RS27A (P62979)          | 2              |
|                   |                           |                         |                                                           |               | BMP10 (O95393)          | 2              |
|                   |                           |                         |                                                           |               | FZD7 (O75084)           | 2              |
|                   |                           |                         |                                                           |               | PAI1 (P05121)           | 2              |
|                   |                           |                         |                                                           |               | PTGDS (P41222)          | 2              |
|                   |                           |                         |                                                           |               | IL6RB (P40189)          | 2              |
|                   |                           |                         |                                                           |               | CO4A5 (P29400)          | 2              |
|                   |                           |                         |                                                           |               | IL6RA (P08887)          | 2              |
|                   |                           |                         |                                                           |               | ITAM (P11215)           | 2              |
|                   |                           |                         |                                                           |               | PEN2 (Q9NZ42)           | 2              |
|                   |                           |                         |                                                           |               | PSN1 (P49768)           | 2              |
|                   |                           |                         |                                                           |               | CD20 (P11836)           | 2              |
|                   |                           |                         |                                                           |               | COMT (P21964)           | 2              |
|                   |                           |                         |                                                           |               | OSTP (P10451)           | 2              |
| BAG3 (Q95817)     | BAG3 (ENSG00000151929)    | 0.906                   | Skeletal muscle, Vagina                                   | Not druggable | HSP7C (P11142)          | 1              |
|                   |                           |                         |                                                           |               |                         | 1              |
| MANBA (O00462)    | MANBA (ENSG00000109323)   | 0.544                   | Granulocytes, Parathyroid gland, Placenta, Salivary gland | Not druggable |                         |                |
| ENTP1 (P49961)    | ENTPD1 (ENSG00000138185)  | 0.808                   | Endometrium, Granulocytes, Smooth muscle                  | Not druggable | OPRM (P35372)           | 2              |
|                   |                           |                         |                                                           |               | ITB2 (P05107)           | 2              |
|                   |                           |                         |                                                           |               | A4 (P05067)             | 2              |
|                   |                           |                         |                                                           |               | MET (P08581)            | 2              |
| PGLT1 (Q8NBL1)    | POGLUT1 (ENSG00000163389) | 0.620                   | Ductus deferens, Pancreas, Seminal vesicle                | Not druggable |                         |                |
|                   |                           |                         |                                                           |               | OPRM (P35372)           | 2              |
| IL18R (Q13478)    | IL18R1 (ENSG00000115604)  | 0.834                   | Lung, Lymph node, NK-cells, Seminal vesicle               | Not druggable | IL18 (Q14116)           | 1              |
| GPC5 (P78333)     | GPC5 (ENSG00000179399)    | 0.844                   | Basal ganglia, Cerebral cortex, Kidney, Pons and medulla  | Not druggable | SYUA (P37840)           | 2              |
| PRDX1 (Q06830)    | PRDX1 (ENSG00000117450)   | 0.559                   | Esophagus, Kidney, Liver, Thyroid gland                   | Not druggable | EGFR (P00533)           | 1              |
|                   |                           |                         |                                                           |               | EGFR (P00533)           | 1              |
|                   |                           |                         |                                                           |               | ANDR (P10275)           | 1              |
| UD16 (P19224)     | UGT1A6 (ENSG00000167165)  | 0.978                   | Kidney, Liver                                             | Not druggable |                         |                |
| BGH3 (Q15582)     | TGFBI (ENSG00000120708)   | 0.751                   | Epididymis, Gallbladder, Placenta                         | Not druggable |                         |                |
| ASAH2 (Q9NR71)    | ASAH2 (ENSG00000188611)   | 0.970                   | Duodenum, Small intestine                                 | Not druggable |                         |                |
| ERAP2 (Q6P179)    | ERAP2 (ENSG00000164308)   | 0.727                   | Colon, Lymph node, Spleen, Thymus                         | Druggable     |                         |                |
|                   |                           |                         |                                                           |               | TPH1 (P17752)           | 2              |
| NET1 (O95631)     | NTN1 (ENSG00000065320)    | 0.823                   | Esophagus, Gallbladder, Heart muscle, Retina              | Not druggable | RL5 (P46777)            | 2              |
| TREM1 (Q9NP99)    | TREM1 (ENSG00000124731)   | 0.957                   | Bone marrow, Granulocytes, Lung                           | Not druggable |                         |                |
|                   |                           |                         |                                                           |               | CASP9 (P55211)          | 2              |
|                   |                           |                         |                                                           |               | RL28 (P46779)           | 2              |
| ISK2 (P20155)     | SPINK2 (ENSG00000128040)  | 0.987                   | Epididymis                                                | Not druggable | A4 (P05067)             | 2              |
|                   |                           |                         |                                                           |               | P85A (P27986)           | 2              |
|                   |                           |                         |                                                           |               | MALT1 (Q9UDY8)          | 2              |
|                   |                           |                         |                                                           |               | AMPQ (Q6Q4G3)           | 2              |
|                   |                           |                         |                                                           |               | CASP1 (P29466)          | 2              |
|                   |                           |                         |                                                           |               | LYAM2 (P16581)          | 2              |
| CATB (P07858)     | CTSB (ENSG00000164733)    | 0.825                   | Adipose tissue, Liver, Lymph node, Thyroid gland          | Not druggable | PSA1 (P25786)           | 2              |
|                   |                           |                         |                                                           |               | PSA1 (P25786)           | 2              |
|                   |                           |                         |                                                           |               | PRS10 (P62333)          | 2              |
|                   |                           |                         |                                                           |               | HSP7C (P11142)          | 2              |

**Table S13:** Annotating the set of directionally concordant CMR proteins. (*continued*)

| Protein (UniProt) | Gene (ensembl)              | mRNA Tissue specificity | Above average mRNA expression                       | Druggability  | Nearest druggable prot.                                                                                                                                      | Prot. distance                            |
|-------------------|-----------------------------|-------------------------|-----------------------------------------------------|---------------|--------------------------------------------------------------------------------------------------------------------------------------------------------------|-------------------------------------------|
| PPAC (P24666)     | ACP1 (ENSG00000143727)      | 0.472                   | Adrenal gland, Liver, Pancreas                      | Not druggable | PSB8 (P28062)<br>5HT1E (P28566)<br>PSA3 (P25788)<br>RSSA (P08865)                                                                                            | 2<br>2<br>2<br>2                          |
| TPSNR (Q9BX59)    | TAPBPL (ENSG00000139192)    | 0.668                   | Monocytes, NK-cells, Small intestine, Total PBMC    | Not druggable | RL3 (P39023)                                                                                                                                                 | 2                                         |
| BSSP4 (Q9GZN4)    | PRSS22 (ENSG00000005001)    | 0.921                   | Esophagus, Tongue, Tonsil                           | Not druggable |                                                                                                                                                              |                                           |
| EPHA1 (P21709)    | EPHA1 (ENSG00000146904)     | 0.967                   | Parathyroid gland                                   | Drugged       | M3K1 (Q13233)<br>RS15A (P62244)                                                                                                                              | 2<br>2                                    |
| KAT3 (Q6YP21)     | CCBL2 (ENSG00000137944)     | 0.340                   | NA                                                  | Not druggable |                                                                                                                                                              |                                           |
| NCAM2 (O15394)    | NCAM2 (ENSG00000154654)     | 0.903                   | Amygdala, Cerebral cortex, Thalamus                 | Not druggable |                                                                                                                                                              |                                           |
| RMD1 (Q96DB5)     | RMDN1 (ENSG00000176623)     | 0.589                   | Granulocytes, Heart muscle, Kidney, Skeletal muscle | Not druggable |                                                                                                                                                              |                                           |
| ASM3A (Q92484)    | SMPDL3A (ENSG00000172594)   | 0.785                   | Colon, Skeletal muscle, Small intestine             | Not druggable |                                                                                                                                                              |                                           |
| CHLE (P06276)     | BCHE (ENSG00000114200)      | 0.965                   | Liver                                               | Drugged       | CASP6 (P55212)<br>HCK (P08631)<br>PSB1 (P20618)<br>HDA10 (Q96958)<br>PDE4D (Q08499)<br>RARA (P10276)<br>VWF (P04275)                                         | 1<br>2<br>2<br>2<br>2<br>2<br>2           |
| PATE4 (P0C8F1)    | PATE4 (ENSG00000237353)     | 0.984                   | Ductus deferens, Seminal vesicle                    | Not druggable | P2RY4 (P51582)<br>P2RY6 (Q15077)<br>PRS7 (P35998)                                                                                                            | 2<br>2<br>2                               |
| SPA12 (Q8IW75)    | SERPINA12 (ENSG00000165953) | 0.998                   | Skin                                                | Not druggable |                                                                                                                                                              |                                           |
| C1QC (P02747)     | C1QC (ENSG00000159189)      | 0.907                   | Lymph node, Spleen                                  | Not druggable | DNM3A (Q9Y6K1)<br>ESR1 (P03372)<br>KEAP1 (Q14145)<br>TBB6 (Q9BUF5)<br>TNNI3 (P19429)<br>NDUS1 (P28331)<br>NDUF4 (Q9P032)<br>GBRG1 (Q8N1C3)<br>ANGP2 (O15123) | 2<br>2<br>2<br>2<br>2<br>2<br>2<br>2<br>1 |
| TIE2 (Q02763)     | TEK (ENSG00000120156)       | 0.808                   | Adipose tissue, Kidney, Lung, Placenta, Spleen      | Drugged       |                                                                                                                                                              |                                           |

*General:*  
Proteins were prioritized by selecting proteins who were associated with at least three CMR traits, and without directionally discordant effects. Data were extracted from Reactome, ChEMBL, and Human Protein Atlas. Tissues with above average mRNA expression were selected based on a z-statistic of at least 1.96. Tissue specificity ranges between 0 (ubiquitous expressed) and 1 (specifically expressed). The nearest druggable protein was identified by linking with Reactome and extracting the nearest proteins that met our definition of druggable (see main text). Distance reflect how many protein interactions (represented by edges in a graph, with one an adjacent protein) these a druggable protein was from the index protein.

**Table S14:** Directionally concordant CMR proteins and their (next) nearest druggable protein.

| Protein (uniprot) | Nearest druggable prot. | Prot. distance | Compound                                                                                                                                                                                           | Drug type          | Drug action                                          | Clinical development phase | Curated indications                                                                                                                                                                     | Curated side effects                                                                                                                                                                                                                                                                                                                                                                                                                                                                                                                                                                                                                                                                                                                                                        |
|-------------------|-------------------------|----------------|----------------------------------------------------------------------------------------------------------------------------------------------------------------------------------------------------|--------------------|------------------------------------------------------|----------------------------|-----------------------------------------------------------------------------------------------------------------------------------------------------------------------------------------|-----------------------------------------------------------------------------------------------------------------------------------------------------------------------------------------------------------------------------------------------------------------------------------------------------------------------------------------------------------------------------------------------------------------------------------------------------------------------------------------------------------------------------------------------------------------------------------------------------------------------------------------------------------------------------------------------------------------------------------------------------------------------------|
| OSMR (Q99650)     | ADRM1 (Q16186)2         |                | Carfilzomib, Bortezomib, Ixazomib Citrate, Oprozomib                                                                                                                                               | Small_Mol, Bio_Mol | Inhibitor                                            | 4                          | Amyloidosis; Amyloidosis, Familial; Anaemia; Cardiac arrest; QT Anemia, Refractory, with Excess of interval prolongation; acute Blasts                                                  | coronary syndrome; amyloidosis; arrhythmias; ascites; atrioventricular block; cardiac arrest; cardiomyopathy; cardiovascular disorder; cerebrovascular insufficiency; chest discomfort; chest pain; circulatory collapse; coagulation disorders; coma; coronary artery insufficiency; diabetes mellitus; dyspnoea; embolism and thrombosis; haemorrhage; heart failure; hyperglycaemia; hypertension; hyperthyroidism; hypotension; inflammation; ischaemic heart disease; multi organ failure; myocardial infarction; myocardial ischaemia; myopathy; oedema; pain; palpitations; pericardial disorders; pericardial effusion; pericarditis; pulmonary hypertension; pulmonary oedema; respiratory disorders; stroke; syncope; vascular disorders; ventricular dysfunction |
|                   | FA10 (P00742)           | 2              | Emicizumab                                                                                                                                                                                         | Bio_Mol, Small_Mol | Other                                                | 4                          |                                                                                                                                                                                         | embolism and thrombosis                                                                                                                                                                                                                                                                                                                                                                                                                                                                                                                                                                                                                                                                                                                                                     |
|                   | S39A6 (Q13433)          | 2              |                                                                                                                                                                                                    | Bio_Mol            |                                                      |                            |                                                                                                                                                                                         |                                                                                                                                                                                                                                                                                                                                                                                                                                                                                                                                                                                                                                                                                                                                                                             |
|                   | RS27A (P62979)          | 2              | Dorlimomab Aritox                                                                                                                                                                                  | Bio_Mol            | Inhibitor                                            | 1                          |                                                                                                                                                                                         |                                                                                                                                                                                                                                                                                                                                                                                                                                                                                                                                                                                                                                                                                                                                                                             |
|                   | BMP10 (O95393)          | 2              | Dalantercept                                                                                                                                                                                       | Bio_Mol            | Inhibitor                                            | 3                          |                                                                                                                                                                                         |                                                                                                                                                                                                                                                                                                                                                                                                                                                                                                                                                                                                                                                                                                                                                                             |
|                   | FZD7 (O75084)           | 2              | Vantictumab                                                                                                                                                                                        | Bio_Mol            | Antagonist                                           | 1                          |                                                                                                                                                                                         |                                                                                                                                                                                                                                                                                                                                                                                                                                                                                                                                                                                                                                                                                                                                                                             |
|                   | PAI1 (P05121)           | 2              | Aleplasinin                                                                                                                                                                                        | Bio_Mol, Small_Mol | Inhibitor                                            | 1                          |                                                                                                                                                                                         |                                                                                                                                                                                                                                                                                                                                                                                                                                                                                                                                                                                                                                                                                                                                                                             |
|                   | PTGDS (P41222)          | 2              | Antrafenine                                                                                                                                                                                        | Bio_Mol            | Inhibitor                                            | 4                          |                                                                                                                                                                                         |                                                                                                                                                                                                                                                                                                                                                                                                                                                                                                                                                                                                                                                                                                                                                                             |
|                   | IL6RB (P40189)          | 2              | Satralizumab                                                                                                                                                                                       | Bio_Mol            | Antagonist                                           | 3                          |                                                                                                                                                                                         |                                                                                                                                                                                                                                                                                                                                                                                                                                                                                                                                                                                                                                                                                                                                                                             |
|                   | CO4A5 (P29400)          | 2              | Collagenase Clostridium Histolyticum, Ocriplasmin                                                                                                                                                  | Bio_Mol            | Hydrolytic Enzyme                                    | 4                          | Stroke; Venous Thrombosis                                                                                                                                                               | haemorrhage                                                                                                                                                                                                                                                                                                                                                                                                                                                                                                                                                                                                                                                                                                                                                                 |
|                   | IL6RA (P08887)          | 2              | Satralizumab                                                                                                                                                                                       | Bio_Mol            | Antagonist                                           | 3                          |                                                                                                                                                                                         |                                                                                                                                                                                                                                                                                                                                                                                                                                                                                                                                                                                                                                                                                                                                                                             |
|                   | ITAM (P11215)           | 2              | Rovelizumab                                                                                                                                                                                        | Bio_Mol            | Antagonist                                           | 2                          |                                                                                                                                                                                         |                                                                                                                                                                                                                                                                                                                                                                                                                                                                                                                                                                                                                                                                                                                                                                             |
|                   | PEN2 (Q9NZ42)           | 2              | Tarenflurbil, Semagacestat, Avagacestat, Begacestat                                                                                                                                                | Small_Mol          | Modulator, Inhibitor                                 | 3                          |                                                                                                                                                                                         |                                                                                                                                                                                                                                                                                                                                                                                                                                                                                                                                                                                                                                                                                                                                                                             |
|                   | PSN1 (P49768)           | 2              | Tarenflurbil, Semagacestat, Avagacestat, Begacestat                                                                                                                                                | Small_Mol          | Modulator, Inhibitor                                 | 3                          |                                                                                                                                                                                         |                                                                                                                                                                                                                                                                                                                                                                                                                                                                                                                                                                                                                                                                                                                                                                             |
|                   | CD20 (P11836)           | 2              | Yttrium Y 90 Ibritumomab Tiuxetan, Rituximab, Ofatumumab, Tositumomab, Obinutuzumab, Ocrelizumab, Ublituximab, Veltuzumab, Ibritumomab Tiuxetan, Tositumomab 131I, Ocaratuzumab, Lfb-R603, Fbt-A05 | Bio_Mol            | Binding Agent, Inhibitor, Other, Cross-Linking Agent | 4                          | Anemia, Aplastic; Anemia, Hemolytic, Autoimmune; Anemia, Sickle Cell; Diabetes Mellitus, Type 1; Heart Failure; Idiopathic Pulmonary Fibrosis; Lung Diseases, Interstitial; Sarcoidosis | Acute coronary syndrome; Arrhythmias; Asthma; anaemia; angina pectoris; arrhythmias; cardiac disorder; chest pain; coagulation disorder; dyspnoea; heart failure; hypercholesterolaemia; hyperglycaemia; hypertension; hypotension; hypoxia; ischaemic heart disease; multi organ failure; myocardial infarction; oedema; pain; respiratory disorders                                                                                                                                                                                                                                                                                                                                                                                                                       |
|                   | COMT (P21964)           | 2              | Tolcapone, Entacapone                                                                                                                                                                              | Small_Mol          | Inhibitor                                            | 4                          |                                                                                                                                                                                         | Myocardial infarction; chest pain; ischaemic heart disease; syncope                                                                                                                                                                                                                                                                                                                                                                                                                                                                                                                                                                                                                                                                                                         |
|                   | OSTP (P10451)           | 2              | Ask-8007                                                                                                                                                                                           | Bio_Mol            | Inhibitor                                            | 2                          |                                                                                                                                                                                         |                                                                                                                                                                                                                                                                                                                                                                                                                                                                                                                                                                                                                                                                                                                                                                             |
| BAG3 (O95817)     | HSP7C (P11142)          | 1              | Forigerimod Acetate                                                                                                                                                                                | Bio_Mol            | Inhibitor                                            | 3                          |                                                                                                                                                                                         |                                                                                                                                                                                                                                                                                                                                                                                                                                                                                                                                                                                                                                                                                                                                                                             |

**Table S14:** Directionally concordant CMR proteins and their (next) nearest druggable protein. *(continued)*

| Protein (uniprot) | Nearest druggable prot. | Prot. distance | Compound                                                                                                                                                                                                                                                                                                                                                                                                                                                                                                                                                                                                                                                                                                                                                                                                                                                                                                                                                 | Drug type          | Drug action                          | Clinical development phase | Curated indications                                                                                                                                                | Curated side effects                                                                                                                                                                                                                                                                            |
|-------------------|-------------------------|----------------|----------------------------------------------------------------------------------------------------------------------------------------------------------------------------------------------------------------------------------------------------------------------------------------------------------------------------------------------------------------------------------------------------------------------------------------------------------------------------------------------------------------------------------------------------------------------------------------------------------------------------------------------------------------------------------------------------------------------------------------------------------------------------------------------------------------------------------------------------------------------------------------------------------------------------------------------------------|--------------------|--------------------------------------|----------------------------|--------------------------------------------------------------------------------------------------------------------------------------------------------------------|-------------------------------------------------------------------------------------------------------------------------------------------------------------------------------------------------------------------------------------------------------------------------------------------------|
| ENTP1 (P49961)    | OPRM (P35372)           | 2              | Hydromorphone Hydrochloride, Oxycodone Terephthalate, Loperamide Hydrochloride, Tramadol Hydrochloride, Alfentanil Hydrochloride, Difenoixin Hydrochloride, Diphenoxylate Hydrochloride, Fentanyl Hydrochloride, Fentanyl Citrate, Oxycodone Hydrochloride, Morphine Sulfate, Propoxyphene Napsylate, Alvimopan, Meperidine Hydrochloride, Methadone Hydrochloride, Propoxyphene Hydrochloride, Levorphanol Tartrate, Dihydrocodeine Bitartrate, Remifentanil Hydrochloride, Methylnaltrexone Bromide, Sufentanil Citrate, Fentanyl, Levomethadyl Acetate Hydrochloride, Buprenorphine Hydrochloride, Anileridine Hydrochloride, Dezocine, Anileridine Phosphate, Tapentadol Hydrochloride, Butorphanol Tartrate, Buprenorphine, Levallorphan Tartrate, Naloxegol Oxalate, Eluxadoline, Methylsamiendorphan, Axelopran, Samidorphan, Faxeadol, Axomadol, Naltalimide, Frakefamide, Naldemedine, Bevenopran, Oliceridine, Naldemedine Tosylate, Oxycodone | Small_Mol          | Agonist, Antagonist, Partial Agonist | 4                          | Anemia, Sickle Cell; Hypertension, Pulmonary; Hypotension; Lung Diseases; Interstitial; Myocardial Infarction; Pre-Eclampsia; Respiratory Distress Syndrome, Adult | Arrhythmias; Dyspnoea; QT interval prolongation; angina pectoris; asthma; atrioventricular block; cardiac arrest; chest pain; circulatory collapse; coma; cyanosis; dyspnoea; haemorrhage; hypertension; hypoglycaemia; hypotension; oedema; pain; palpitations; respiratory disorders; syncope |
|                   | ITB2 (P05107)           | 2              | Efalizumab, Lifitegrast, Rovelizumab                                                                                                                                                                                                                                                                                                                                                                                                                                                                                                                                                                                                                                                                                                                                                                                                                                                                                                                     | Bio_Mol, Small_Mol | Inhibitor, Antagonist                | 4                          | Diabetes Mellitus, Type 1                                                                                                                                          |                                                                                                                                                                                                                                                                                                 |
|                   | A4 (P05067)             | 2              | Gantenerumab, Solanezumab, Bapineuzumab, Aducanumab, Crenezumab, Ponezumab, Gsk933776, Ban2401                                                                                                                                                                                                                                                                                                                                                                                                                                                                                                                                                                                                                                                                                                                                                                                                                                                           | Bio_Mol, Small_Mol | Other, Inhibitor                     | 3                          |                                                                                                                                                                    |                                                                                                                                                                                                                                                                                                 |
|                   | MET (P08581)            | 2              | Cabozantinib S-Malate, Crizotinib, Bms-794833, Telisotuzumab, Amg-208, Arry-300, Bms-698769, Bms-817378, Altiratinib, Emd-1204831, Jnj-38877605, Merestinib, Mk-8033, Pf-04217903, Sar-125844, Sgx-523, Tas-115, Bpi-9016, Amg-337, Savolitinib, Bms-777607, Golvatinib, Foretinib, Mgcd-265, Mk-2461, Amuvatinib, Tepotinib, Capmatinib, Tivantinib, Onartuzumab, Emibetuzumab                                                                                                                                                                                                                                                                                                                                                                                                                                                                                                                                                                          | Bio_Mol, Small_Mol | Inhibitor, Antagonist                | 4                          | Pulmonary Disease, Chronic Obstructive                                                                                                                             | Anaemia; QT interval prolongation; arrhythmias; heart failure; hypophosphataemia; oedema; pulmonary oedema; respiratory disorders; syncope                                                                                                                                                      |
|                   | OPRM (P35372)           | 2              | Hydrocodone Polistirex, Codeine Polistirex, Oxymorphone Hydrochloride, Naltrexone, Codeine Phosphate, Codeine Sulfate, Naltrexone Hydrochloride, Nalbuphine Hydrochloride, Nalmefene Hydrochloride, Naloxone Hydrochloride, Hydrocodone Bitartrate, Odelepran, Cebranopadol, Dextromoramide                                                                                                                                                                                                                                                                                                                                                                                                                                                                                                                                                                                                                                                              | Small_Mol          | Agonist, Antagonist                  | 4                          | Respiratory Distress Syndrome, Adult                                                                                                                               | Arrhythmias; Cardiac arrest; chest pain; dyspnoea; hyperglycaemia; hypertension; hypotension; pain; palpitations; pulmonary oedema; tachycardia                                                                                                                                                 |

**Table S14:** Directionally concordant CMR proteins and their (next) nearest druggable protein. *(continued)*

| Protein (uniprot) | Nearest druggable prot. | Prot. distance | Compound                                                                                                                                                                                                                                                                                                                                                                                                                                                                                                                                                                                                                                          | Drug type          | Drug action                                 | Clinical development phase | Curated indications                                                                                                                                                   | Curated side effects                                                                                                                                                                                                                                                                                                                                                       |
|-------------------|-------------------------|----------------|---------------------------------------------------------------------------------------------------------------------------------------------------------------------------------------------------------------------------------------------------------------------------------------------------------------------------------------------------------------------------------------------------------------------------------------------------------------------------------------------------------------------------------------------------------------------------------------------------------------------------------------------------|--------------------|---------------------------------------------|----------------------------|-----------------------------------------------------------------------------------------------------------------------------------------------------------------------|----------------------------------------------------------------------------------------------------------------------------------------------------------------------------------------------------------------------------------------------------------------------------------------------------------------------------------------------------------------------------|
| IL18R (Q13478)    | IL18 (Q14116)           | 1              | Gsk-1070806, Medi-2338                                                                                                                                                                                                                                                                                                                                                                                                                                                                                                                                                                                                                            | Bio_Mol            | Inhibitor, Cross-Linking Agent              | 2                          | Diabetes Mellitus; Pulmonary Disease, Chronic Obstructive                                                                                                             |                                                                                                                                                                                                                                                                                                                                                                            |
| GPC5 (P78333)     | SYUA (P37840)           | 2              | Biib054                                                                                                                                                                                                                                                                                                                                                                                                                                                                                                                                                                                                                                           | Bio_Mol, Small_Mol | Inhibitor                                   | 2                          |                                                                                                                                                                       |                                                                                                                                                                                                                                                                                                                                                                            |
| PRDX1 (Q06830)    | EGFR (P00533)           | 1              | Vandetanib, Osimertinib Mesylate, Dacomitinib, Pozitotinib, Neratinib Maleate                                                                                                                                                                                                                                                                                                                                                                                                                                                                                                                                                                     | Bio_Mol, Small_Mol | Inhibitor                                   | 4                          |                                                                                                                                                                       |                                                                                                                                                                                                                                                                                                                                                                            |
|                   | EGFR (P00533)           | 1              | Panitumumab, Cetuximab, Erlotinib Hydrochloride, Gefitinib, Lapatinib Ditosylate, Afatinib Dimaleate, Necitumumab, Ac-480, Allitinib, Azd-4769, Falnidamol, Cep-32496, Cudc-101, Olmutinib, Theliatinib, Eplitinib, Jnj-26483327, Mp-412, Pd-0166285, Pki-166, S-222611, Tak-285, Puqutinib, Pyrotinib, Aee-788, Brigatinib, Varlitinib, Sapitinib, Bms-690514, Rociletinib, Pelitinib, Tesevatinib, Egrf816, Osimertinib, Canertinib Dihydrochloride, Neratinib, Dacomitinib, Simotinib, Zalutumumab, Matuzumab, Mab-425, Mdx-447, Rg-7160, Nimotuzumab, Futuximab, Depatuxizumab Mafodotin, Duligotuzumab, Imgatuzumab, Ro-5083945, Zatumaximab | Bio_Mol, Small_Mol | Inhibitor, Antagonist, Other, Binding Agent | 4                          |                                                                                                                                                                       | Anaemia; Cardiac arrest; Embolism and thrombosis; QT interval prolongation; anaemia; arrhythmias; chest discomfort; chest pain; cyanosis; dyspnoea; embolism and thrombosis; haemorrhage; hyperglycaemia; hypertension; hypokalaemia; hypomagnesaemia; hypotension; interstitial lung disease; oedema; pain; palpitations; respiratory disorders; tachycardia              |
|                   | ANDR (P10275)           | 1              | Oxymetholone, Flutamide, Nilutamide, Dromostanolone Propionate, Bicalutamide, Methyltestosterone, Ethylestrenol, Stanozolol, Testosterone Propionate, Testosterone Enanthate, Nandrolone Decanoate, Oxandrolone, Testosterone Cypionate, Testosterone, Fluoxymesterone, Enzalutamide, Nandrolone Phenpropionate, Danazol, Testosterone Undecanoate, He3235, Gsk2881078, Gsk2849466, Vk5211, Apc-100, Glpg0492, Azd3514, Lgd-2941, Ly2452473, Mk-0773, Cb-03-01, Galeterone, Cr 1447, Odm-201, Enobosarm, Apalutamide, Methandrostenolone, Cyproterone Acetate, Abiraterone                                                                        | Bio_Mol, Small_Mol | Agonist, Antagonist, Modulator              | 4                          | Hereditary angioedema; Anemia, Aplastic; Cerebral Arterial Diseases; Coronary Artery Disease; Coronary Disease; Heart Failure; Pulmonary Disease, Chronic Obstructive | Acute coronary syndrome; Anaemia; QT interval prolongation; anaemia; cardiovascular disorder; chest pain; dyslipidaemia; dyspnoea; embolism and thrombosis; heart failure; hypercholesterolaemia; hypertension; interstitial lung disease; ischaemic heart disease; myocardial infarction; oedema; pain; palpitations; respiratory disorders; tachycardia; thromboembolism |
|                   | TPH1 (P17752)           | 2              | Telotristat, Telotristat Ethyl, Telotristat Etiprate                                                                                                                                                                                                                                                                                                                                                                                                                                                                                                                                                                                              | Small_Mol          | Inhibitor                                   | 4                          | Carcinoid Heart Disease                                                                                                                                               |                                                                                                                                                                                                                                                                                                                                                                            |
| NET1 (O95631)     | RL5 (P46777)            | 2              | Dorlimomab Aritox                                                                                                                                                                                                                                                                                                                                                                                                                                                                                                                                                                                                                                 | Bio_Mol            | Inhibitor                                   | 1                          |                                                                                                                                                                       |                                                                                                                                                                                                                                                                                                                                                                            |
|                   | CASP9 (P55211)          | 2              | Emricasan                                                                                                                                                                                                                                                                                                                                                                                                                                                                                                                                                                                                                                         | Small_Mol          | Inhibitor                                   | 2                          | Diabetes Mellitus                                                                                                                                                     |                                                                                                                                                                                                                                                                                                                                                                            |
|                   | RL28 (P46779)           | 2              | Dorlimomab Aritox                                                                                                                                                                                                                                                                                                                                                                                                                                                                                                                                                                                                                                 | Bio_Mol            | Inhibitor                                   | 1                          |                                                                                                                                                                       |                                                                                                                                                                                                                                                                                                                                                                            |
| ISK2 (P20155)     | A4 (P05067)             | 2              | Gantenerumab, Solanezumab, Bapineuzumab, Aducanumab, Crenezumab, Ponezumab, Gsk933776, Ban2401                                                                                                                                                                                                                                                                                                                                                                                                                                                                                                                                                    | Bio_Mol, Small_Mol | Other, Inhibitor                            | 3                          |                                                                                                                                                                       |                                                                                                                                                                                                                                                                                                                                                                            |

**Table S14:** Directionally concordant CMR proteins and their (next) nearest druggable protein. *(continued)*

| Protein (uniprot) | Nearest druggable prot. | Prot. distance | Compound                                                                                                                                                                                                                                                                                             | Drug type          | Drug action           | Clinical development phase | Curated indications                                                                                                                   | Curated side effects                                                                                                                                                                                                                                                                                                                                                                                                                                                                                                                                                                                                                                                                                                                                                        |
|-------------------|-------------------------|----------------|------------------------------------------------------------------------------------------------------------------------------------------------------------------------------------------------------------------------------------------------------------------------------------------------------|--------------------|-----------------------|----------------------------|---------------------------------------------------------------------------------------------------------------------------------------|-----------------------------------------------------------------------------------------------------------------------------------------------------------------------------------------------------------------------------------------------------------------------------------------------------------------------------------------------------------------------------------------------------------------------------------------------------------------------------------------------------------------------------------------------------------------------------------------------------------------------------------------------------------------------------------------------------------------------------------------------------------------------------|
|                   | P85A (P27986)           | 2              | Azd-6482, Ds-7423, Gsk-1059615, Omipalisib, Recilisib, Panulisib, Pa-799, Pwt-33587, Rg-7666, Sf-1126, Vs-5584, Wx-037, Puqutinib, Copanlisib, Dactolisib, Bgt-226, Buparlisib, Pf-04691502, Gedatolisib, Sonolisib, Pictilisib, Apitolisib, Taselisib, Pilaralisib, Voxelisib, Zstk-474, Ly-3023414 | Small_Mol          | Inhibitor             | 4                          | Idiopathic Pulmonary Fibrosis                                                                                                         |                                                                                                                                                                                                                                                                                                                                                                                                                                                                                                                                                                                                                                                                                                                                                                             |
|                   | MALT1 (Q9UDY8)          | 2              | Mepazine Acetate                                                                                                                                                                                                                                                                                     | Small_Mol          | Inhibitor             | 4                          |                                                                                                                                       |                                                                                                                                                                                                                                                                                                                                                                                                                                                                                                                                                                                                                                                                                                                                                                             |
|                   | AMPQ (Q6Q4G3)           | 2              | Tosedostat                                                                                                                                                                                                                                                                                           | Small_Mol          | Inhibitor             | 2                          |                                                                                                                                       |                                                                                                                                                                                                                                                                                                                                                                                                                                                                                                                                                                                                                                                                                                                                                                             |
|                   | CASP1 (P29466)          | 2              | Nivocasan                                                                                                                                                                                                                                                                                            | Small_Mol          | Inhibitor             | 2                          |                                                                                                                                       |                                                                                                                                                                                                                                                                                                                                                                                                                                                                                                                                                                                                                                                                                                                                                                             |
|                   | LYAM2 (P16581)          | 2              | Rivipansel, Cdp-850                                                                                                                                                                                                                                                                                  | Bio_Mol, Small_Mol | Antagonist, Inhibitor | 3                          | Anemia, Sickle Cell                                                                                                                   |                                                                                                                                                                                                                                                                                                                                                                                                                                                                                                                                                                                                                                                                                                                                                                             |
| CATB (P07858)     | PSA1 (P25786)           | 2              | Marizomib                                                                                                                                                                                                                                                                                            | Small_Mol          | Inhibitor             | 3                          |                                                                                                                                       |                                                                                                                                                                                                                                                                                                                                                                                                                                                                                                                                                                                                                                                                                                                                                                             |
|                   | PSA1 (P25786)           | 2              | Carfilzomib, Bortezomib, Ixazomib Citrate, Oprozomib                                                                                                                                                                                                                                                 | Small_Mol          | Inhibitor             | 4                          | Amyloidosis; Amyloidosis, Familial; Anemia; Cardiac arrest; QT Anemia, Refractory, with Excess of interval prolongation; acute Blasts | coronary syndrome; amyloidosis; arrhythmias; ascites; atrioventricular block; cardiac arrest; cardiomyopathy; cardiovascular disorder; cerebrovascular insufficiency; chest discomfort; chest pain; circulatory collapse; coagulation disorders; coma; coronary artery insufficiency; diabetes mellitus; dyspnoea; embolism and thrombosis; haemorrhage; heart failure; hyperglycaemia; hypertension; hyperthyroidism; hypotension; inflammation; ischaemic heart disease; multi organ failure; myocardial infarction; myocardial ischaemia; myopathy; oedema; pain; palpitations; pericardial disorders; pericardial effusion; pericarditis; pulmonary hypertension; pulmonary oedema; respiratory disorders; stroke; syncope; vascular disorders; ventricular dysfunction |

**Table S14:** Directionally concordant CMR proteins and their (next) nearest druggable protein. (*continued*)

| Protein (uniprot) | Nearest druggable prot. Prot. distance | Compound                                                            | Drug type          | Drug action         | Clinical development phase | Curated indications                                                                                                                    | Curated side effects                                                                                                                                                                                                                                                                                                                                                                                                                                                                                                                                                                                                                                                                                                                                                        |
|-------------------|----------------------------------------|---------------------------------------------------------------------|--------------------|---------------------|----------------------------|----------------------------------------------------------------------------------------------------------------------------------------|-----------------------------------------------------------------------------------------------------------------------------------------------------------------------------------------------------------------------------------------------------------------------------------------------------------------------------------------------------------------------------------------------------------------------------------------------------------------------------------------------------------------------------------------------------------------------------------------------------------------------------------------------------------------------------------------------------------------------------------------------------------------------------|
|                   | PRS10 (P62333) 2                       | Carfilzomib, Bortezomib, Ixazomib Citrate, Oprozomib                | Small_Mol, Bio_Mol | Inhibitor           | 4                          | Amyloidosis; Amyloidosis, Familial; Anaemia; Cardiac arrest; QT Anemia, Refractory, with Excess of interval prolongation; acute Blasts | coronary syndrome; amyloidosis; arrhythmias; ascites; atrioventricular block; cardiac arrest; cardiomyopathy; cardiovascular disorder; cerebrovascular insufficiency; chest discomfort; chest pain; circulatory collapse; coagulation disorders; coma; coronary artery insufficiency; diabetes mellitus; dyspnoea; embolism and thrombosis; haemorrhage; heart failure; hyperglycaemia; hypertension; hyperthyroidism; hypotension; inflammation; ischaemic heart disease; multi organ failure; myocardial infarction; myocardial ischaemia; myopathy; oedema; pain; palpitations; pericardial disorders; pericardial effusion; pericarditis; pulmonary hypertension; pulmonary oedema; respiratory disorders; stroke; syncope; vascular disorders; ventricular dysfunction |
|                   | HSP7C (P11142) 2                       | Forigerimod Acetate                                                 | Bio_Mol            | Inhibitor           | 3                          |                                                                                                                                        |                                                                                                                                                                                                                                                                                                                                                                                                                                                                                                                                                                                                                                                                                                                                                                             |
|                   | PSB8 (P28062) 2                        | Marizomib                                                           | Small_Mol          | Inhibitor           | 3                          |                                                                                                                                        |                                                                                                                                                                                                                                                                                                                                                                                                                                                                                                                                                                                                                                                                                                                                                                             |
| PPAC (P24666)     | 5HT1E (P28566) 2                       | Dexfenfluramine Hydrochloride, Zimeldine Hydrochloride, Amisulpride | Bio_Mol, Small_Mol | Agonist, Antagonist | 4                          |                                                                                                                                        | Hyperglycaemia; QT interval prolongation; arrhythmias; cardiac arrest; dyslipidaemia; embolism and thrombosis; hyponatraemia; hypotension                                                                                                                                                                                                                                                                                                                                                                                                                                                                                                                                                                                                                                   |
|                   | PSA3 (P25788) 2                        | Carfilzomib, Bortezomib, Ixazomib Citrate, Oprozomib                | Small_Mol          | Inhibitor           | 4                          | Amyloidosis; Amyloidosis, Familial; Anaemia; Cardiac arrest; QT Anemia, Refractory, with Excess of interval prolongation; acute Blasts | coronary syndrome; amyloidosis; arrhythmias; ascites; atrioventricular block; cardiac arrest; cardiomyopathy; cardiovascular disorder; cerebrovascular insufficiency; chest discomfort; chest pain; circulatory collapse; coagulation disorders; coma; coronary artery insufficiency; diabetes mellitus; dyspnoea; embolism and thrombosis; haemorrhage; heart failure; hyperglycaemia; hypertension; hyperthyroidism; hypotension; inflammation; ischaemic heart disease; multi organ failure; myocardial infarction; myocardial ischaemia; myopathy; oedema; pain; palpitations; pericardial disorders; pericardial effusion; pericarditis; pulmonary hypertension; pulmonary oedema; respiratory disorders; stroke; syncope; vascular disorders; ventricular dysfunction |
|                   | RSSA (P08865) 2                        | Dorlimomab Aritox                                                   | Bio_Mol            | Inhibitor           | 1                          |                                                                                                                                        |                                                                                                                                                                                                                                                                                                                                                                                                                                                                                                                                                                                                                                                                                                                                                                             |
|                   | RL3 (P39023) 2                         | Dorlimomab Aritox                                                   | Bio_Mol            | Inhibitor           | 1                          |                                                                                                                                        |                                                                                                                                                                                                                                                                                                                                                                                                                                                                                                                                                                                                                                                                                                                                                                             |
| EPHA1 (P21709)    | M3K1 (Q13233) 2                        | E-6201                                                              | Small_Mol          | Inhibitor           | 2                          |                                                                                                                                        |                                                                                                                                                                                                                                                                                                                                                                                                                                                                                                                                                                                                                                                                                                                                                                             |
|                   | RS15A (P62244) 2                       | Dorlimomab Aritox                                                   | Bio_Mol            | Inhibitor           | 1                          |                                                                                                                                        |                                                                                                                                                                                                                                                                                                                                                                                                                                                                                                                                                                                                                                                                                                                                                                             |
| CHLE (P06276)     | CASP6 (P55212) 1                       | Emricasan                                                           | Small_Mol          | Inhibitor           | 2                          | Diabetes Mellitus                                                                                                                      |                                                                                                                                                                                                                                                                                                                                                                                                                                                                                                                                                                                                                                                                                                                                                                             |



**Table S14:** Directionally concordant CMR proteins and their (next) nearest druggable protein. (*continued*)

| Protein (uniprot) | Nearest druggable prot. | Prot. distance | Compound                                                                                       | Drug type          | Drug action        | Clinical development phase | Curated indications                                                                                                                                                                                                                                                                                                                                                                                                                                                                                                                                                                | Curated side effects                                                                                                                                                                                                                                                                                                                                                                                                                                                                                                                                                                                                                                                                                                                                                                                                                 |
|-------------------|-------------------------|----------------|------------------------------------------------------------------------------------------------|--------------------|--------------------|----------------------------|------------------------------------------------------------------------------------------------------------------------------------------------------------------------------------------------------------------------------------------------------------------------------------------------------------------------------------------------------------------------------------------------------------------------------------------------------------------------------------------------------------------------------------------------------------------------------------|--------------------------------------------------------------------------------------------------------------------------------------------------------------------------------------------------------------------------------------------------------------------------------------------------------------------------------------------------------------------------------------------------------------------------------------------------------------------------------------------------------------------------------------------------------------------------------------------------------------------------------------------------------------------------------------------------------------------------------------------------------------------------------------------------------------------------------------|
| HCK (P08631)      | 2                       |                | Bosutinib                                                                                      | Small_Mol          | Inhibitor          | 4                          |                                                                                                                                                                                                                                                                                                                                                                                                                                                                                                                                                                                    | Anaemia; QT interval prolongation; chest discomfort; dyspnoea; haemorrhage; hypertension; oedema; pain; pericardial effusion; pericarditis; pulmonary hypertension; pulmonary oedema; respiratory disorders                                                                                                                                                                                                                                                                                                                                                                                                                                                                                                                                                                                                                          |
| PSB1 (P20618)     | 2                       |                | Marizomib                                                                                      | Small_Mol          | Inhibitor          | 3                          |                                                                                                                                                                                                                                                                                                                                                                                                                                                                                                                                                                                    |                                                                                                                                                                                                                                                                                                                                                                                                                                                                                                                                                                                                                                                                                                                                                                                                                                      |
| HDA10 (Q96958)    | 2                       |                | Romidepsin, Belinostat, Panobinostat Lactate, Cudc-101, Fimepinostat, Tacedinaline, Entinostat | Small_Mol          | Inhibitor          | 4                          |                                                                                                                                                                                                                                                                                                                                                                                                                                                                                                                                                                                    |                                                                                                                                                                                                                                                                                                                                                                                                                                                                                                                                                                                                                                                                                                                                                                                                                                      |
| PDE4D (Q08499)    | 2                       |                | Pentoxifylline, Dipyridamole                                                                   | Small_Mol          | Inhibitor          | 4                          | Adjunct to oral anticoagulation for prophylaxis of thromboembolism associated with prosthetic heart valves; Secondary prevention of ischaemic stroke (not associated with atrial fibrillation) and transient ischaemic attacks (used alone or with aspirin); Secondary prevention of ischaemic stroke and transient ischaemic attacks; Acute Coronary Syndrome; Anemia; Anemia, Sickle Cell; Angina, Stable; Cardiovascular Diseases; Carotid Stenosis; Coronary Artery Disease; Coronary Disease; Fibrosis; Heart Diseases; Hypertension; Myocardial Ischemia; Stroke; Thrombosis | Angina pectoris; angina pectoris; arrhythmias; haemorrhage; hypotension; tachycardia                                                                                                                                                                                                                                                                                                                                                                                                                                                                                                                                                                                                                                                                                                                                                 |
| RARA (P10276)     | 2                       |                | Alitretinoin, Acitretin, Etretinate, Mofarotene                                                | Small_Mol          | Agonist, Modulator | 4                          |                                                                                                                                                                                                                                                                                                                                                                                                                                                                                                                                                                                    | anaemia; haemorrhage; hypercholesterolaemia; hypertension                                                                                                                                                                                                                                                                                                                                                                                                                                                                                                                                                                                                                                                                                                                                                                            |
| VWF (P04275)      | 2                       |                | Caplacizumab                                                                                   | Bio_Mol            | Inhibitor          | 3                          | Thrombosis                                                                                                                                                                                                                                                                                                                                                                                                                                                                                                                                                                         | dyspnoea; haemorrhage                                                                                                                                                                                                                                                                                                                                                                                                                                                                                                                                                                                                                                                                                                                                                                                                                |
| P2RY4 (P51582)    | 2                       |                |                                                                                                | Bio_Mol, Small_Mol |                    |                            |                                                                                                                                                                                                                                                                                                                                                                                                                                                                                                                                                                                    |                                                                                                                                                                                                                                                                                                                                                                                                                                                                                                                                                                                                                                                                                                                                                                                                                                      |
| P2RY6 (Q15077)    | 2                       |                |                                                                                                | Bio_Mol, Small_Mol |                    |                            |                                                                                                                                                                                                                                                                                                                                                                                                                                                                                                                                                                                    |                                                                                                                                                                                                                                                                                                                                                                                                                                                                                                                                                                                                                                                                                                                                                                                                                                      |
| PRS7 (P35998)     | 2                       |                | Carfilzomib, Bortezomib, Ixazomib Citrate, Oprozomib                                           | Small_Mol, Bio_Mol | Inhibitor          | 4                          | Amyloidosis; Amyloidosis, Familial; Anemia, Refractory, with Excess of Blasts                                                                                                                                                                                                                                                                                                                                                                                                                                                                                                      | Anaemia; Cardiac arrest; QT interval prolongation; acute coronary syndrome; amyloidosis; arrhythmias; ascites; atrioventricular block; cardiac arrest; cardiomyopathy; cardiovascular disorder; cerebrovascular insufficiency; chest discomfort; chest pain; circulatory collapse; coagulation disorders; coma; coronary artery insufficiency; diabetes mellitus; dyspnoea; embolism and thrombosis; haemorrhage; heart failure; hyperglycaemia; hypertension; hyperthyroidism; hypotension; inflammation; ischaemic heart disease; multi organ failure; myocardial infarction; myocardial ischaemia; myopathy; oedema; pain; palpitations; pericardial disorders; pericardial effusion; pericarditis; pulmonary hypertension; pulmonary oedema; respiratory disorders; stroke; syncope; vascular disorders; ventricular dysfunction |
| DNM3A (Q9Y6K1)    | 2                       |                | Azacitidine, Decitabine                                                                        | Small_Mol          | Inhibitor          | 4                          | Anemia, Refractory, with Excess of Blasts; Anemia, Sickle Cell; Thrombocytopenia                                                                                                                                                                                                                                                                                                                                                                                                                                                                                                   | Anaemia; anaemia; chest pain; dyspnoea; haemorrhage; hypertension; hypokalaemia; hypotension; inflammation; interstitial lung disease; pain; respiratory disorders; syncope                                                                                                                                                                                                                                                                                                                                                                                                                                                                                                                                                                                                                                                          |

**Table S14:** Directionally concordant CMR proteins and their (next) nearest druggable protein. (*continued*)

| Protein (uniprot) | Nearest druggable prot. | Prot. distance | Compound                                                                                                                                                                                                                                                                                                                                                                                      | Drug type          | Drug action                              | Clinical development phase | Curated indications                                                                                                                                                                                                                                   | Curated side effects                                                                                                                                                                                                                                                                                                                                                                                                                                                                                                                       |
|-------------------|-------------------------|----------------|-----------------------------------------------------------------------------------------------------------------------------------------------------------------------------------------------------------------------------------------------------------------------------------------------------------------------------------------------------------------------------------------------|--------------------|------------------------------------------|----------------------------|-------------------------------------------------------------------------------------------------------------------------------------------------------------------------------------------------------------------------------------------------------|--------------------------------------------------------------------------------------------------------------------------------------------------------------------------------------------------------------------------------------------------------------------------------------------------------------------------------------------------------------------------------------------------------------------------------------------------------------------------------------------------------------------------------------------|
| ESR1 (P03372)     | 2                       |                | Polyestradiol Phosphate, Tamoxifen Citrate, Estrone, Estradiol, Estradiol Acetate, Estradiol Valerate, Clomiphene Citrate, Ethinyl Estradiol, Dienestrol, Estradiol Cypionate, Estropipate, Mestranol, Diethylstilbestrol, Sr16234, Rad1901, Brilanestrant, Gtx-758                                                                                                                           | Small_Mol          | Agonist, Modulator, Antagonist, Degradar | 4                          | Atherosclerosis; Cerebral Arterial Diseases; Coronary Artery Disease; Hypertension; Venous Diabetes Mellitus, Type 1; Diabetes Mellitus, Type 2; Fibrosis; Hypertension; Myocardial Ischemia                                                          | Cerebrovascular insufficiency; hypertension; venous thromboembolism; arterial thromboembolism; asthma; cerebrovascular insufficiency; chest pain; dyspnoea; embolism and thrombosis; haemorrhage; hypercalcaemia; hypertension; hypotension; myocardial infarction; oedema; pain; palpitations; vascular disorders; venous thromboembolism                                                                                                                                                                                                 |
| KEAP1 (Q14145)    | 2                       |                | Dimethyl Fumarate                                                                                                                                                                                                                                                                                                                                                                             | Small_Mol          | Inhibitor                                | 4                          | Acute Coronary Syndrome; Arrhythmias, Cardiac; Asthma;                                                                                                                                                                                                | Anaemia; Ascites; Atrioventricular block; Respiratory disorders;                                                                                                                                                                                                                                                                                                                                                                                                                                                                           |
| TBB6 (Q9BUF5)     | 2                       |                | Trastuzumab Emtansine, Brentuximab Vedotin, Paclitaxel, Docetaxel, Eribulin Mesylate, Cabazitaxel, Colchicine, Ixabepilone, Vincristine Sulfate, Vinorelbine Tartrate, Vinblastine Sulfate, Paclitaxel Poliglumex, Indibulin, Davunetide, Crolibulin, Lexibulin, Vinflunine, Fosbretabulin Disodium, Fosbretabulin Tromethamine, Sagopilone, Plinabulin, Verubulin, Mirvetuximab Soravtansine | Bio_Mol, Small_Mol | Inhibitor, Stabiliser, Disrupting Agent  | 4                          | Atrial Fibrillation; Coronary Artery Disease; Coronary Restenosis; Heart Diseases; Ischemia; Lung Diseases; Myocardial Infarction; Pericarditis; Peripheral Arterial Disease; Pneumonia, Viral; ST Elevation Myocardial Infarction; Vascular Diseases | anaemia; arrhythmia; arrhythmias; cardiac arrest; chest discomfort; chest pain; chest tightness; congestive heart failure; coronary artery disease; dyspnoea; embolism and thrombosis; haemorrhage; heart failure; hyperglycaemia; hypertension; hypoglycaemia; hypokalaemia; hyponatraemia; hypotension; multi organ failure; myocardial infarction; myocardial ischaemia; myopathy; oedema; pain; pericardial effusion; pulmonary oedema; respiratory disorders; stroke; syncope; tachycardia; venous thromboembolism; venous thrombosis |
| TNNI3 (P19429)    | 2                       |                | Levosimendan                                                                                                                                                                                                                                                                                                                                                                                  | Small_Mol          | Positive Modulator                       | 3                          | Cardiovascular Diseases; Coronary Disease; Heart Failure; Ischemic Attack, Transient; ST Elevation Myocardial Infarction; Stroke                                                                                                                      |                                                                                                                                                                                                                                                                                                                                                                                                                                                                                                                                            |
| NDUS1 (P28331)    | 2                       |                | Metformin Hydrochloride, Me-344, Nv-128                                                                                                                                                                                                                                                                                                                                                       | Small_Mol          | Inhibitor                                | 4                          | Type 2 diabetes mellitus [monotherapy or in combination with other antidiabetic drugs (including insulin)]; Type 2 diabetes mellitus [reduction in risk or delay of onset]; Diabetes Mellitus; Diabetes Mellitus, Type 2; Heart Failure               |                                                                                                                                                                                                                                                                                                                                                                                                                                                                                                                                            |
| NDUF4 (Q9P032)    | 2                       |                | Metformin Hydrochloride, Me-344, Nv-128                                                                                                                                                                                                                                                                                                                                                       | Small_Mol          | Inhibitor                                | 4                          | Type 2 diabetes mellitus [monotherapy or in combination with other antidiabetic drugs (including insulin)]; Type 2 diabetes mellitus [reduction in risk or delay of onset]; Diabetes Mellitus; Diabetes Mellitus, Type 2; Heart Failure               |                                                                                                                                                                                                                                                                                                                                                                                                                                                                                                                                            |

**Table S14:** Directionally concordant CMR proteins and their (next) nearest druggable protein. (*continued*)

| Protein (uniprot) | Nearest druggable prot.                                                                                                                                                                                                                                                                                                                                                                                                                                                                                                                                                                                                                                                                                                                                                                                                                                        | Prot. distance | Compound                                                | Drug type                                                                                                           | Drug action | Clinical development phase                                                                                                                                                                                                                                                | Curated indications                                                                                                                                                                                                                                                                                                                                                                                                                                                                                                                                                                    | Curated side effects |
|-------------------|----------------------------------------------------------------------------------------------------------------------------------------------------------------------------------------------------------------------------------------------------------------------------------------------------------------------------------------------------------------------------------------------------------------------------------------------------------------------------------------------------------------------------------------------------------------------------------------------------------------------------------------------------------------------------------------------------------------------------------------------------------------------------------------------------------------------------------------------------------------|----------------|---------------------------------------------------------|---------------------------------------------------------------------------------------------------------------------|-------------|---------------------------------------------------------------------------------------------------------------------------------------------------------------------------------------------------------------------------------------------------------------------------|----------------------------------------------------------------------------------------------------------------------------------------------------------------------------------------------------------------------------------------------------------------------------------------------------------------------------------------------------------------------------------------------------------------------------------------------------------------------------------------------------------------------------------------------------------------------------------------|----------------------|
| GBRG1 (Q8N1C3)2   | Methoxyflurane, Flumazenil, Clorazepate Dipotassium, Chlordiazepoxide, Chlordiazepoxide Hydrochloride, Diazepam, Eszopiclone, Oxazepam, Meprobamate, Clobazam, Alprazolam, Triazolam, Butalbital, Clonazepam, Desflurane, Estazolam, Talbutal, Butabarbital Sodium, Glutethimide, Acamprosate Calcium, Lorazepam, Enflurane, Ethchlorvynol, Metharbital, Methohexital Sodium, Methpyrrolon, Midazolam Hydrochloride, Prazepam, Primidone, Propofol, Quazepam, Pentobarbital, Pentobarbital Sodium, Secobarbital Sodium, Sevoflurane, Temazepam, Thiamylal Sodium, Thiopental Sodium, Etomidate, Flurazepam Hydrochloride, Halazepam, Halothane, Isoflurane, Topiramate, Triclofos Sodium, Adipiplon, Loreplon, Resequinil, Pf-06372865, Ganaxolone, Pagoclone, Flunitrazepam, Methaqualone, Methaqualone Hydrochloride, Tetrazepam, Clomethiazole, Clotiazepam |                | Bio_Mol, Small_Mol                                      | Positive Modulator, Allosteric Antagonist, Positive Allosteric Modulator, Agonist, Partial Agonist, Inverse Agonist | 4           | Anemia; Atherosclerosis; Coronary Artery Disease; Diabetes Mellitus; Diabetes Mellitus, Type 1; Diabetes Mellitus, Type 2; Heart Diseases; Heart Failure; Hypertension; Hypotension; Pulmonary Disease, Chronic Obstructive; Respiratory Distress Syndrome, Adult; Stroke | Arrhythmia; Arrhythmias; Asthma; Bradycardia; Coagulation disorder; Hypoxia; QT interval prolongation; Thrombosis; anaemia; arrhythmias; atrioventricular block; bradycardia; cardiac arrest; chest discomfort; chest pain; circulatory collapse; coma; dyspnoea; embolism and thrombosis; haemorrhage; heart failure; hypertension; hypokalaemia; hyponatraemia; hypotension; hypoxia; myocardial infarction; myocardial ischaemia; myopathy; oedema; pain; palpitations; pulmonary oedema; respiratory disorder; respiratory disorders; syncope; thrombosis; ventricular dysfunction |                      |
| TIE2 (Q02763)     | ANGP2 (O15123) 1                                                                                                                                                                                                                                                                                                                                                                                                                                                                                                                                                                                                                                                                                                                                                                                                                                               |                | Trebananib, Nesvacumab, Vanucizumab, Amg-780, Medi-3617 | Bio_Mol                                                                                                             | Inhibitor   | 3                                                                                                                                                                                                                                                                         |                                                                                                                                                                                                                                                                                                                                                                                                                                                                                                                                                                                        |                      |

*General:*

Proteins were prioritized by selecting proteins who were associated with at least three CMR traits, and without pathological discordant effects. Data were extracted from Reactome, ChEMBL, and Human Protein Atlas. The nearest druggable protein was identified by linking with Reactome and extracting the nearest proteins that met our definition of druggable (see main text). Distance reflect how many protein interactions (represented by edges in a graph, with one an adjacent protein) these a druggable protein was from the index protein.

**Table S15:** Directionally concordant CMR proteins: MR effect estimates of plasma protein effects on sixteen CMR traits.

| Protein (UniProt) | Gene (ensembl)          | CMR trait        | No. hits/Path. concordance | MD (95%CI)             | P-value                | Multiple testing threshold | Q p-value | No. variants | MR model | PQTL source |
|-------------------|-------------------------|------------------|----------------------------|------------------------|------------------------|----------------------------|-----------|--------------|----------|-------------|
| TDGF1 (P13385)    | TDGF1 (ENSG00000241186) | RV - SV (ml)     | 8.0/8.0                    | 0.24 (0.18; 0.30)      | $1.8 \times 10^{-15}$  | $7.81 \times 10^{-6}$      | <0.001    | 56           | IWW      | Interval    |
|                   |                         | RV - PFR (ml/s)  |                            | 1.41 (0.94; 1.89)      | $4.1 \times 10^{-9}$   |                            | 0.002     | 58           | MR Egger |             |
|                   |                         | RV - PER (ml/s)  |                            | 1.34 (0.93; 1.76)      | $3.0 \times 10^{-10}$  |                            | <0.001    | 55           | IWW      |             |
|                   |                         | RV - PAFR (ml/s) |                            | 0.61 (0.12; 1.11)      | $1.6 \times 10^{-2}$   |                            | <0.001    | 48           | IWW      |             |
|                   |                         | RV - ESV (ml)    |                            | -0.01 (-0.08; 0.06)    | $7.7 \times 10^{-1}$   |                            | 0.019     | 46           | IWW      |             |
|                   |                         | RV - EF (%)      |                            | 0.08 (0.05; 0.10)      | $4.6 \times 10^{-10}$  |                            | 0.011     | 51           | IWW      |             |
|                   |                         | RV - EDV (ml)    |                            | 0.20 (0.10; 0.30)      | $5.7 \times 10^{-5}$   |                            | <0.001    | 54           | IWW      |             |
|                   |                         | LV - SV (ml)     |                            | 0.33 (0.24; 0.43)      | $8.6 \times 10^{-12}$  |                            | <0.001    | 57           | MR Egger |             |
|                   |                         | LV - PFR (ml/s)  |                            | 0.61 (0.25; 0.98)      | $9.4 \times 10^{-4}$   |                            | 0.030     | 56           | IWW      |             |
|                   |                         | LV - PER (ml/s)  |                            | 1.22 (0.77; 1.68)      | $1.6 \times 10^{-7}$   |                            | <0.001    | 60           | MR Egger |             |
|                   |                         | LV - PAFR (ml/s) |                            | 0.76 (0.26; 1.26)      | $2.7 \times 10^{-3}$   |                            | <0.001    | 58           | MR Egger |             |
|                   |                         | LV - MVR (g/ml)  |                            | 0.00 (0.00; 0.00)      | $1.6 \times 10^{-3}$   |                            | 0.016     | 50           | IWW      |             |
|                   |                         | LV - ESV (ml)    |                            | -0.18 (-0.25; -0.12)   | $5.4 \times 10^{-6}$   |                            | 0.010     | 47           | IWW      |             |
|                   |                         | LV - EF (%)      |                            | 0.08 (0.05; 0.10)      | $8.0 \times 10^{-9}$   |                            | <0.001    | 48           | IWW      |             |
|                   |                         | LV - EDV (ml)    |                            | -0.17 (-0.27; -0.07)   | $9.3 \times 10^{-4}$   |                            | 0.003     | 50           | IWW      |             |
|                   |                         | LV - EDM (g)     |                            | -0.11 (-0.16; -0.05)   | $2.2 \times 10^{-4}$   |                            | 0.013     | 49           | IWW      |             |
| OSMR (Q99650)     | OSMR (ENSG00000145623)  | RV - SV (ml)     | 7.0/7.0                    | -1.19 (-1.64; -0.74)   | $2.6 \times 10^{-7}$   | $7.81 \times 10^{-6}$      | 0.986     | 9            | IWW      | Interval    |
|                   |                         | RV - PFR (ml/s)  |                            | -7.23 (-9.85; -4.61)   | $6.5 \times 10^{-8}$   |                            | 0.318     | 9            | IWW      |             |
|                   |                         | RV - PER (ml/s)  |                            | -1.34 (-3.88; 1.19)    | $3.0 \times 10^{-1}$   |                            | 0.531     | 9            | IWW      |             |
|                   |                         | RV - PAFR (ml/s) |                            | -5.07 (-8.03; -2.10)   | $8.2 \times 10^{-4}$   |                            | 0.384     | 9            | IWW      |             |
|                   |                         | RV - ESV (ml)    |                            | 0.57 (0.10; 1.03)      | $1.7 \times 10^{-2}$   |                            | 0.551     | 9            | IWW      |             |
|                   |                         | RV - EF (%)      |                            | -0.52 (-0.70; -0.34)   | $6.9 \times 10^{-9}$   |                            | 0.793     | 9            | IWW      |             |
|                   |                         | RV - EDV (ml)    |                            | -0.55 (-1.30; 0.20)    | $1.5 \times 10^{-1}$   |                            | 0.840     | 9            | IWW      |             |
|                   |                         | LV - SV (ml)     |                            | -1.37 (-1.84; -0.91)   | $6.7 \times 10^{-9}$   |                            | 0.030     | 9            | IWW      |             |
|                   |                         | LV - PFR (ml/s)  |                            | -9.70 (-13.41; -5.98)  | $3.1 \times 10^{-7}$   |                            | 0.074     | 9            | IWW      |             |
|                   |                         | LV - PER (ml/s)  |                            | -10.50 (-13.23; -7.77) | $4.6 \times 10^{-14}$  |                            | 0.482     | 9            | IWW      |             |
|                   |                         | LV - PAFR (ml/s) |                            | 3.35 (0.31; 6.38)      | $3.1 \times 10^{-2}$   |                            | 0.612     | 9            | IWW      |             |
|                   |                         | LV - MVR (g/ml)  |                            | -0.00 (-0.00; 0.00)    | $9.1 \times 10^{-1}$   |                            | 0.807     | 9            | IWW      |             |
|                   |                         | LV - ESV (ml)    |                            | 0.46 (0.03; 0.90)      | $3.7 \times 10^{-2}$   |                            | 0.740     | 9            | IWW      |             |
|                   |                         | LV - EF (%)      |                            | -0.47 (-0.67; -0.28)   | $2.2 \times 10^{-6}$   |                            | 0.292     | 9            | IWW      |             |
|                   |                         | LV - EDV (ml)    |                            | -0.85 (-1.69; 0.00)    | $5.1 \times 10^{-2}$   |                            | 0.229     | 9            | IWW      |             |
|                   |                         | LV - EDM (g)     |                            | -0.41 (-0.81; -0.00)   | $4.7 \times 10^{-2}$   |                            | 0.695     | 9            | IWW      |             |
| BAG3 (O95817)     | BAG3 (ENSG00000151929)  | RV - SV (ml)     | 6.0/6.0                    | -0.52 (-5.25; 4.22)    | $8.3 \times 10^{-1}$   | $7.81 \times 10^{-6}$      | 0.162     | 5            | MR Egger | Interval    |
|                   |                         | RV - PFR (ml/s)  |                            | 13.85 (9.22; 18.48)    | $4.4 \times 10^{-9}$   |                            | 0.100     | 5            | IWW      |             |
|                   |                         | RV - PER (ml/s)  |                            | 4.14 (0.46; 7.82)      | $2.7 \times 10^{-2}$   |                            | 0.337     | 5            | IWW      |             |
|                   |                         | RV - PAFR (ml/s) |                            | -0.96 (-4.88; 2.95)    | $6.3 \times 10^{-1}$   |                            | 0.674     | 5            | IWW      |             |
|                   |                         | RV - ESV (ml)    |                            | -0.68 (-4.85; 3.48)    | $7.5 \times 10^{-1}$   |                            | 0.286     | 5            | MR Egger |             |
|                   |                         | RV - EF (%)      |                            | 2.96 (2.67; 3.26)      | $1.0 \times 10^{-100}$ |                            | 0.003     | 4            | IWW      |             |
|                   |                         | RV - EDV (ml)    |                            | -0.93 (-6.93; 5.08)    | $7.6 \times 10^{-1}$   |                            | 0.777     | 5            | MR Egger |             |
|                   |                         | LV - SV (ml)     |                            | -0.50 (-1.34; 0.35)    | $2.5 \times 10^{-1}$   |                            | 0.132     | 5            | IWW      |             |
|                   |                         | LV - PFR (ml/s)  |                            | -5.41 (-27.60; 16.78)  | $6.3 \times 10^{-1}$   |                            | 0.015     | 5            | MR Egger |             |
|                   |                         | LV - PER (ml/s)  |                            | -5.56 (-9.71; -1.41)   | $8.7 \times 10^{-3}$   |                            | 0.290     | 5            | IWW      |             |
|                   |                         | LV - PAFR (ml/s) |                            | -9.28 (-13.42; -5.14)  | $1.1 \times 10^{-5}$   |                            | 0.726     | 5            | IWW      |             |
|                   |                         | LV - MVR (g/ml)  |                            | 0.00 (-0.02; 0.02)     | $7.7 \times 10^{-1}$   |                            | 0.773     | 5            | MR Egger |             |
|                   |                         | LV - ESV (ml)    |                            | -7.94 (-9.04; -6.84)   | $1.0 \times 10^{-100}$ |                            | 0.075     | 4            | IWW      |             |
|                   |                         | LV - EF (%)      |                            | 3.11 (2.81; 3.40)      | $1.0 \times 10^{-100}$ |                            | <0.001    | 4            | IWW      |             |
|                   |                         | LV - EDV (ml)    |                            | -7.80 (-8.81; -6.80)   | $1.0 \times 10^{-100}$ |                            | 0.689     | 5            | IWW      |             |
|                   |                         | LV - EDM (g)     |                            | -2.11 (-2.67; -1.56)   | $5.5 \times 10^{-14}$  |                            | 0.772     | 5            | IWW      |             |
| MANBA (O00462)    | MANBA (ENSG00000109323) | RV - SV (ml)     | 5.0/5.0                    | -0.23 (-0.59; 0.13)    | $2.1 \times 10^{-1}$   | $7.81 \times 10^{-6}$      | 0.364     | 26           | MR Egger | Interval    |
|                   |                         | RV - PFR (ml/s)  |                            | 4.23 (2.25; 6.22)      | $2.8 \times 10^{-5}$   |                            | 0.004     | 25           | MR Egger |             |
|                   |                         | RV - PER (ml/s)  |                            | -0.08 (-1.99; 1.82)    | $9.3 \times 10^{-1}$   |                            | 0.926     | 27           | MR Egger |             |
|                   |                         | RV - PAFR (ml/s) |                            | -1.05 (-2.63; 0.52)    | $1.9 \times 10^{-1}$   |                            | 0.059     | 20           | IWW      |             |
|                   |                         | RV - ESV (ml)    |                            | -1.06 (-1.41; -0.71)   | $2.7 \times 10^{-9}$   |                            | 0.008     | 28           | MR Egger |             |
|                   |                         | RV - EF (%)      |                            | 0.43 (0.28; 0.57)      | $5.8 \times 10^{-9}$   |                            | 0.005     | 25           | MR Egger |             |
|                   |                         | RV - EDV (ml)    |                            | -1.30 (-1.91; -0.68)   | $3.4 \times 10^{-5}$   |                            | 0.252     | 27           | MR Egger |             |
|                   |                         | LV - SV (ml)     |                            | 0.13 (-0.22; 0.48)     | $4.8 \times 10^{-1}$   |                            | 0.967     | 27           | MR Egger |             |
|                   |                         | LV - PFR (ml/s)  |                            | 2.33 (1.56; 3.11)      | $3.5 \times 10^{-9}$   |                            | 0.357     | 26           | IWW      |             |
|                   |                         | LV - PER (ml/s)  |                            | 0.91 (-0.19; 2.01)     | $1.0 \times 10^{-1}$   |                            | 0.267     | 23           | IWW      |             |
|                   |                         | LV - PAFR (ml/s) |                            | -3.02 (-5.31; -0.73)   | $9.7 \times 10^{-3}$   |                            | 0.997     | 26           | MR Egger |             |
|                   |                         | LV - MVR (g/ml)  |                            | 0.00 (0.00; 0.01)      | $1.2 \times 10^{-5}$   |                            | 0.003     | 27           | MR Egger |             |
|                   |                         | LV - ESV (ml)    |                            | -0.47 (-0.63; -0.31)   | $1.3 \times 10^{-6}$   |                            | 0.033     | 24           | IWW      |             |
|                   |                         | LV - EF (%)      |                            | 0.23 (0.16; 0.31)      | $6.5 \times 10^{-10}$  |                            | 0.193     | 23           | IWW      |             |

**Table S15:** Directionally concordant CMR proteins: MR effect estimates of plasma protein effects on sixteen CMR traits. (continued)

| Protein (UniProt) | Gene (ensembl)            | CMR trait           | No. hits/Path. concordance | MD (95%CI)            | P-value                | Multiple testing threshold | Q p-value            | No. variants MR model | PQTL source |          |
|-------------------|---------------------------|---------------------|----------------------------|-----------------------|------------------------|----------------------------|----------------------|-----------------------|-------------|----------|
| UD16 (P19224)     | UGT1A6 (ENSG00000167165)  | LV - EDV (ml)       |                            | 0.07 (-0.49; 0.62)    | $8.1 \times 10^{-3}$   |                            | 0.858                | 28                    | MR Egger    |          |
|                   |                           | LV - EDM (g)        |                            | 0.54 (0.22; 0.86)     | $1.0 \times 10^{-3}$   |                            | 0.297                | 28                    | MR Egger    |          |
|                   |                           | RV - SV (ml)        | 4.0/4.0                    | 1.18 (0.46; 1.90)     | $1.4 \times 10^{-3}$   | $7.81 \times 10^{-6}$      | 0.047                | 19                    | MR Egger    | Interval |
|                   |                           | RV - PFR (ml/s)     |                            | -0.31 (-1.93; 1.31)   | $7.1 \times 10^{-1}$   |                            | 0.218                | 17                    | IWV         |          |
|                   |                           | RV - PER (ml/s)     |                            | 5.31 (0.63; 10.00)    | $2.6 \times 10^{-2}$   |                            | 0.148                | 19                    | MR Egger    |          |
|                   |                           | RV - PAFR (ml/s)    |                            | -1.02 (-3.15; 1.11)   | $3.5 \times 10^{-1}$   |                            | 0.133                | 16                    | IWV         |          |
|                   |                           | RV - ESV (ml)       |                            | 0.13 (-0.15; 0.40)    | $3.7 \times 10^{-1}$   |                            | <0.001               | 17                    | IWV         |          |
|                   |                           | RV - EF (%)         |                            | 0.03 (-0.11; 0.16)    | $7.0 \times 10^{-1}$   |                            | 0.128                | 15                    | IWV         |          |
|                   |                           | RV - EDV (ml)       |                            | 0.05 (-0.40; 0.50)    | $8.2 \times 10^{-1}$   |                            | 0.005                | 17                    | IWV         |          |
|                   |                           | LV - SV (ml)        |                            | -1.42 (-1.71; -1.12)  | $1.0 \times 10^{-100}$ |                            | 0.012                | 15                    | IWV         |          |
|                   |                           | LV - PFR (ml/s)     |                            | -5.10 (-7.00; -3.20)  | $1.4 \times 10^{-7}$   |                            | 0.178                | 17                    | IWV         |          |
|                   |                           | LV - PER (ml/s)     |                            | -4.64 (-6.32; -2.96)  | $6.0 \times 10^{-8}$   |                            | 0.617                | 16                    | IWV         |          |
|                   |                           | LV - PAFR (ml/s)    |                            | 2.21 (0.41; 4.02)     | $1.6 \times 10^{-2}$   |                            | 0.004                | 17                    | IWV         |          |
|                   |                           | LV - MVR (g/ml)     |                            | 0.00 (0.00; 0.00)     | $7.6 \times 10^{-5}$   |                            | 0.038                | 15                    | IWV         |          |
|                   |                           | LV - ESV (ml)       |                            | 0.10 (-0.16; 0.36)    | $4.4 \times 10^{-1}$   |                            | 0.945                | 17                    | IWV         |          |
|                   |                           | LV - EF (%)         |                            | -0.35 (-0.47; -0.23)  | $1.0 \times 10^{-8}$   |                            | 0.212                | 17                    | IWV         |          |
|                   |                           | LV - EDV (ml)       |                            | -1.25 (-1.82; -0.69)  | $1.3 \times 10^{-5}$   |                            | 0.098                | 16                    | IWV         |          |
| LV - EDM (g)      |                           | -0.20 (-0.45; 0.04) | $1.1 \times 10^{-1}$       |                       | 0.022                  | 16                         | IWV                  |                       |             |          |
| TREM1 (Q9NP99)    | TREM1 (ENSG00000124731)   | RV - SV (ml)        | 4.0/4.0                    | -0.11 (-0.24; 0.02)   | $9.2 \times 10^{-2}$   | $7.81 \times 10^{-6}$      | 0.249                | 31                    | IWV         | Interval |
|                   |                           | RV - PFR (ml/s)     |                            | -1.56 (-2.62; -0.51)  | $3.7 \times 10^{-3}$   |                            | 0.607                | 32                    | MR Egger    |          |
|                   |                           | RV - PER (ml/s)     |                            | -2.32 (-3.60; -1.05)  | $3.6 \times 10^{-4}$   |                            | 0.091                | 33                    | MR Egger    |          |
|                   |                           | RV - PAFR (ml/s)    |                            | -2.39 (-3.30; -1.48)  | $2.4 \times 10^{-7}$   |                            | 0.101                | 30                    | IWV         |          |
|                   |                           | RV - ESV (ml)       |                            | 0.83 (0.57; 1.09)     | $3.5 \times 10^{-10}$  |                            | 0.087                | 32                    | MR Egger    |          |
|                   |                           | RV - EF (%)         |                            | -0.30 (-0.38; -0.23)  | $4.2 \times 10^{-14}$  |                            | 0.360                | 32                    | MR Egger    |          |
|                   |                           | RV - EDV (ml)       |                            | -0.22 (-0.45; 0.01)   | $5.5 \times 10^{-2}$   |                            | 0.124                | 32                    | IWV         |          |
|                   |                           | LV - SV (ml)        |                            | -0.32 (-0.53; -0.12)  | $1.6 \times 10^{-3}$   |                            | 0.046                | 34                    | MR Egger    |          |
|                   |                           | LV - PFR (ml/s)     |                            | 0.03 (-0.82; 0.89)    | $9.4 \times 10^{-1}$   |                            | 0.052                | 32                    | IWV         |          |
|                   |                           | LV - PER (ml/s)     |                            | -0.90 (-1.71; -0.09)  | $3.0 \times 10^{-2}$   |                            | 0.138                | 32                    | IWV         |          |
|                   |                           | LV - PAFR (ml/s)    |                            | -2.13 (-3.59; -0.66)  | $4.4 \times 10^{-3}$   |                            | 0.224                | 31                    | MR Egger    |          |
|                   |                           | LV - MVR (g/ml)     |                            | -0.00 (-0.00; 0.00)   | $9.7 \times 10^{-1}$   |                            | 0.577                | 34                    | MR Egger    |          |
|                   |                           | LV - ESV (ml)       |                            | 0.07 (-0.05; 0.19)    | $2.5 \times 10^{-1}$   |                            | 0.243                | 32                    | IWV         |          |
|                   |                           | LV - EF (%)         |                            | -0.33 (-0.41; -0.26)  | $1.0 \times 10^{-100}$ |                            | 0.901                | 34                    | MR Egger    |          |
|                   |                           | LV - EDV (ml)       |                            | -0.00 (-0.23; 0.22)   | $9.8 \times 10^{-1}$   |                            | 0.075                | 31                    | IWV         |          |
|                   |                           | LV - EDM (g)        |                            | -0.21 (-0.32; -0.10)  | $2.9 \times 10^{-4}$   |                            | 0.003                | 30                    | IWV         |          |
|                   |                           | PRDX1 (Q06830)      | PRDX1 (ENSG00000117450)    | RV - SV (ml)          | 4.0/4.0                | -0.09 (-1.06; 0.89)        | $8.6 \times 10^{-1}$ | $7.81 \times 10^{-6}$ | 0.661       | 3        |
| RV - PFR (ml/s)   |                           |                     |                            | -5.15 (-10.38; 0.08)  | $5.3 \times 10^{-2}$   |                            | 0.741                | 3                     | IWV         |          |
| RV - PER (ml/s)   |                           |                     |                            | 4.94 (-2.74; 12.63)   | $2.1 \times 10^{-1}$   |                            | 0.136                | 3                     | IWV         |          |
| RV - PAFR (ml/s)  |                           |                     |                            | -3.93 (-10.11; 2.25)  | $2.1 \times 10^{-1}$   |                            | 0.784                | 3                     | IWV         |          |
| RV - ESV (ml)     |                           |                     |                            | 2.60 (1.60; 3.60)     | $3.2 \times 10^{-7}$   |                            | 0.035                | 3                     | IWV         |          |
| RV - EF (%)       |                           |                     |                            | -1.02 (-1.44; -0.61)  | $1.4 \times 10^{-6}$   |                            | 0.300                | 3                     | IWV         |          |
| RV - EDV (ml)     |                           |                     |                            | 2.25 (0.01; 4.50)     | $4.9 \times 10^{-2}$   |                            | 0.145                | 3                     | IWV         |          |
| LV - SV (ml)      |                           |                     |                            | -0.08 (-1.08; 0.92)   | $8.8 \times 10^{-1}$   |                            | 0.396                | 3                     | IWV         |          |
| LV - PFR (ml/s)   |                           |                     |                            | 2.71 (-3.27; 8.70)    | $3.7 \times 10^{-1}$   |                            | 0.496                | 3                     | IWV         |          |
| LV - PER (ml/s)   |                           |                     |                            | 4.32 (-2.12; 10.77)   | $1.9 \times 10^{-1}$   |                            | 0.300                | 3                     | IWV         |          |
| LV - PAFR (ml/s)  |                           |                     |                            | -0.98 (-7.50; 5.55)   | $7.7 \times 10^{-1}$   |                            | 0.741                | 3                     | IWV         |          |
| LV - MVR (g/ml)   |                           |                     |                            | -0.01 (-0.01; 0.00)   | $1.1 \times 10^{-1}$   |                            | 0.199                | 3                     | IWV         |          |
| LV - ESV (ml)     |                           |                     |                            | 2.13 (1.20; 3.06)     | $7.4 \times 10^{-6}$   |                            | 0.033                | 3                     | IWV         |          |
| LV - EF (%)       |                           |                     |                            | -0.99 (-1.38; -0.59)  | $9.9 \times 10^{-7}$   |                            | 0.345                | 3                     | IWV         |          |
| LV - EDV (ml)     |                           |                     |                            | 2.04 (-0.61; 4.69)    | $1.3 \times 10^{-1}$   |                            | 0.062                | 3                     | IWV         |          |
| LV - EDM (g)      |                           |                     |                            | 0.46 (-0.41; 1.32)    | $3.0 \times 10^{-1}$   |                            | 0.447                | 3                     | IWV         |          |
| PGLT1 (Q8NBL1)    | POGLUT1 (ENSG00000163389) |                     |                            | RV - SV (ml)          | 4.0/4.0                | 0.08 (-1.24; 1.40)         | $9.0 \times 10^{-1}$ | $7.81 \times 10^{-6}$ | 0.119       | 11       |
|                   |                           | RV - PFR (ml/s)     |                            | 3.32 (0.83; 5.81)     | $9.0 \times 10^{-3}$   |                            | <0.001               | 11                    | IWV         |          |
|                   |                           | RV - PER (ml/s)     |                            | -4.01 (-11.19; 3.16)  | $2.7 \times 10^{-1}$   |                            | 0.147                | 11                    | MR Egger    |          |
|                   |                           | RV - PAFR (ml/s)    |                            | 1.36 (-1.95; 4.67)    | $4.2 \times 10^{-1}$   |                            | <0.001               | 10                    | IWV         |          |
|                   |                           | RV - ESV (ml)       |                            | -1.89 (-2.37; -1.41)  | $8.4 \times 10^{-15}$  |                            | 0.434                | 11                    | IWV         |          |
|                   |                           | RV - EF (%)         |                            | 0.40 (0.22; 0.58)     | $1.2 \times 10^{-5}$   |                            | 0.600                | 11                    | IWV         |          |
|                   |                           | RV - EDV (ml)       |                            | -2.96 (-3.77; -2.14)  | $9.0 \times 10^{-13}$  |                            | 0.596                | 10                    | IWV         |          |
|                   |                           | LV - SV (ml)        |                            | -0.55 (-1.67; 0.57)   | $3.4 \times 10^{-1}$   |                            | 0.375                | 11                    | MR Egger    |          |
|                   |                           | LV - PFR (ml/s)     |                            | -0.01 (-6.48; 6.46)   | $1.0 \times 10^0$      |                            | 0.582                | 11                    | MR Egger    |          |
|                   |                           | LV - PER (ml/s)     |                            | -9.92 (-18.30; -1.53) | $2.0 \times 10^{-2}$   |                            | 0.073                | 11                    | MR Egger    |          |
|                   |                           | LV - PAFR (ml/s)    |                            | 0.19 (-2.92; 3.30)    | $9.0 \times 10^{-1}$   |                            | 0.848                | 11                    | IWV         |          |
|                   |                           | LV - MVR (g/ml)     |                            | -0.01 (-0.02; -0.00)  | $4.0 \times 10^{-3}$   |                            | 0.056                | 11                    | MR Egger    |          |

**Table S15:** Directionally concordant CMR proteins: MR effect estimates of plasma protein effects on sixteen CMR traits. (continued)

| Protein (UniProt) | Gene (ensembl)            | CMR trait        | No. hits/Path. concordance<br>MD (95%CI) | P-value                | Multiple testing threshold | Q p-value | No. variants<br>MR model | PQTL source       |
|-------------------|---------------------------|------------------|------------------------------------------|------------------------|----------------------------|-----------|--------------------------|-------------------|
|                   |                           | LV - ESV (ml)    | -1.25 (-1.85; -0.65)                     | 4.3×10 <sup>-5</sup>   |                            | 0.052     | 11                       | IVW               |
|                   |                           | LV - EF (%)      | 0.31 (0.12; 0.49)                        | 1.0×10 <sup>-3</sup>   |                            | 0.570     | 11                       | IVW               |
|                   |                           | LV - EDV (ml)    | -2.32 (-3.12; -1.52)                     | 1.1×10 <sup>-6</sup>   |                            | 0.626     | 10                       | IVW               |
|                   |                           | LV - EDM (g)     | -1.34 (-1.82; -0.86)                     | 3.5×10 <sup>-6</sup>   |                            | 0.748     | 8                        | IVW               |
| NET1 (O95631)     | NTN1 (ENSG00000065320)    | RV - SV (ml)     | 4.0/4.0 -0.93 (-1.47; -0.39)             | 6.7×10 <sup>-4</sup>   | 7.81×10 <sup>-6</sup>      | 0.005     | 28                       | MR Egger Interval |
|                   |                           | RV - PFR (ml/s)  | 1.01 (-0.23; 2.24)                       | 1.1×10 <sup>-1</sup>   |                            | <0.001    | 28                       | IVW               |
|                   |                           | RV - PER (ml/s)  | -2.56 (-3.62; -1.51)                     | 1.9×10 <sup>-6</sup>   |                            | 0.216     | 31                       | IVW               |
|                   |                           | RV - PAFR (ml/s) | -3.29 (-4.67; -1.92)                     | 2.6×10 <sup>-6</sup>   |                            | 0.074     | 31                       | IVW               |
|                   |                           | RV - ESV (ml)    | -0.30 (-0.51; -0.09)                     | 4.8×10 <sup>-3</sup>   |                            | 0.095     | 31                       | IVW               |
|                   |                           | RV - EF (%)      | -0.08 (-0.15; -0.00)                     | 3.8×10 <sup>-2</sup>   |                            | 0.006     | 28                       | IVW               |
|                   |                           | RV - EDV (ml)    | -1.60 (-2.39; -0.81)                     | 7.9×10 <sup>-5</sup>   |                            | <0.001    | 31                       | MR Egger          |
|                   |                           | LV - SV (ml)     | -0.68 (-1.16; -0.21)                     | 5.0×10 <sup>-3</sup>   |                            | 0.020     | 30                       | MR Egger          |
|                   |                           | LV - PFR (ml/s)  | -2.83 (-3.98; -1.68)                     | 1.5×10 <sup>-6</sup>   |                            | <0.001    | 29                       | IVW               |
|                   |                           | LV - PER (ml/s)  | -3.18 (-4.29; -2.06)                     | 2.3×10 <sup>-6</sup>   |                            | 0.029     | 30                       | IVW               |
|                   |                           | LV - PAFR (ml/s) | -2.14 (-3.36; -0.92)                     | 5.9×10 <sup>-4</sup>   |                            | 0.019     | 30                       | IVW               |
|                   |                           | LV - MVR (g/ml)  | 0.00 (0.00; 0.00)                        | 3.0×10 <sup>-5</sup>   |                            | 0.157     | 31                       | IVW               |
|                   |                           | LV - ESV (ml)    | -0.11 (-0.31; 0.09)                      | 2.8×10 <sup>-1</sup>   |                            | 0.003     | 29                       | IVW               |
|                   |                           | LV - EF (%)      | -0.07 (-0.14; 0.00)                      | 5.9×10 <sup>-2</sup>   |                            | 0.045     | 30                       | IVW               |
|                   |                           | LV - EDV (ml)    | -0.68 (-1.04; -0.32)                     | 2.5×10 <sup>-4</sup>   |                            | 0.066     | 29                       | IVW               |
|                   |                           | LV - EDM (g)     | -0.14 (-0.33; 0.05)                      | 1.5×10 <sup>-1</sup>   |                            | 0.012     | 28                       | IVW               |
| IL18R (Q13478)    | IL18R1 (ENSG000000115604) | RV - SV (ml)     | 4.0/4.0 -0.33 (-0.54; -0.12)             | 1.7×10 <sup>-3</sup>   | 7.81×10 <sup>-6</sup>      | 0.131     | 46                       | MR Egger Interval |
|                   |                           | RV - PFR (ml/s)  | -2.28 (-3.29; -1.27)                     | 1.0×10 <sup>-5</sup>   |                            | <0.001    | 45                       | MR Egger          |
|                   |                           | RV - PER (ml/s)  | -1.32 (-2.60; -0.03)                     | 4.4×10 <sup>-2</sup>   |                            | 0.213     | 44                       | MR Egger          |
|                   |                           | RV - PAFR (ml/s) | 1.10 (-0.09; 2.29)                       | 7.0×10 <sup>-2</sup>   |                            | 0.006     | 45                       | MR Egger          |
|                   |                           | RV - ESV (ml)    | -0.05 (-0.16; 0.06)                      | 3.8×10 <sup>-1</sup>   |                            | <0.001    | 33                       | IVW               |
|                   |                           | RV - EF (%)      | -0.01 (-0.09; 0.08)                      | 8.5×10 <sup>-1</sup>   |                            | 0.052     | 45                       | MR Egger          |
|                   |                           | RV - EDV (ml)    | -0.65 (-0.96; -0.34)                     | 3.6×10 <sup>-5</sup>   |                            | 0.008     | 46                       | MR Egger          |
|                   |                           | LV - SV (ml)     | -0.16 (-0.38; 0.06)                      | 1.5×10 <sup>-1</sup>   |                            | 0.088     | 46                       | MR Egger          |
|                   |                           | LV - PFR (ml/s)  | -1.81 (-2.98; -0.64)                     | 2.3×10 <sup>-3</sup>   |                            | <0.001    | 44                       | MR Egger          |
|                   |                           | LV - PER (ml/s)  | 2.50 (1.20; 3.80)                        | 1.6×10 <sup>-4</sup>   |                            | 0.076     | 45                       | MR Egger          |
|                   |                           | LV - PAFR (ml/s) | -2.48 (-3.77; -1.20)                     | 1.6×10 <sup>-4</sup>   |                            | <0.001    | 43                       | MR Egger          |
|                   |                           | LV - MVR (g/ml)  | 0.00 (0.00; 0.00)                        | 4.3×10 <sup>-4</sup>   |                            | 0.005     | 45                       | MR Egger          |
|                   |                           | LV - ESV (ml)    | -0.26 (-0.35; -0.17)                     | 5.0×10 <sup>-8</sup>   |                            | 0.091     | 32                       | IVW               |
|                   |                           | LV - EF (%)      | 0.10 (0.07; 0.14)                        | 3.0×10 <sup>-8</sup>   |                            | <0.001    | 35                       | IVW               |
|                   |                           | LV - EDV (ml)    | -0.50 (-0.62; -0.39)                     | 1.0×10 <sup>-100</sup> |                            | <0.001    | 39                       | IVW               |
|                   |                           | LV - EDM (g)     | -0.18 (-0.25; -0.11)                     | 2.8×10 <sup>-7</sup>   |                            | <0.001    | 40                       | IVW               |
| GPC5 (P78333)     | GPC5 (ENSG000000179399)   | RV - SV (ml)     | 4.0/4.0 -0.42 (-0.54; -0.30)             | 1.6×10 <sup>-11</sup>  | 7.81×10 <sup>-6</sup>      | 0.003     | 78                       | IVW Interval      |
|                   |                           | RV - PFR (ml/s)  | -3.77 (-4.36; -3.18)                     | 1.0×10 <sup>-100</sup> |                            | <0.001    | 77                       | IVW               |
|                   |                           | RV - PER (ml/s)  | 2.00 (0.41; 3.59)                        | 1.4×10 <sup>-2</sup>   |                            | 0.002     | 83                       | MR Egger          |
|                   |                           | RV - PAFR (ml/s) | 0.25 (-0.41; 0.92)                       | 4.6×10 <sup>-1</sup>   |                            | <0.001    | 83                       | IVW               |
|                   |                           | RV - ESV (ml)    | 0.72 (0.44; 1.00)                        | 4.5×10 <sup>-7</sup>   |                            | <0.001    | 83                       | MR Egger          |
|                   |                           | RV - EF (%)      | -0.26 (-0.36; -0.16)                     | 6.1×10 <sup>-7</sup>   |                            | 0.026     | 88                       | MR Egger          |
|                   |                           | RV - EDV (ml)    | -0.43 (-0.63; -0.23)                     | 3.3×10 <sup>-5</sup>   |                            | <0.001    | 74                       | IVW               |
|                   |                           | LV - SV (ml)     | -0.11 (-0.23; 0.01)                      | 7.6×10 <sup>-2</sup>   |                            | <0.001    | 77                       | IVW               |
|                   |                           | LV - PFR (ml/s)  | 3.00 (1.10; 4.90)                        | 2.0×10 <sup>-3</sup>   |                            | <0.001    | 78                       | MR Egger          |
|                   |                           | LV - PER (ml/s)  | -1.28 (-1.93; -0.64)                     | 9.8×10 <sup>-5</sup>   |                            | 0.004     | 83                       | IVW               |
|                   |                           | LV - PAFR (ml/s) | -0.79 (-1.53; -0.06)                     | 3.5×10 <sup>-2</sup>   |                            | <0.001    | 82                       | IVW               |
|                   |                           | LV - MVR (g/ml)  | 0.00 (-0.00; 0.00)                       | 1.7×10 <sup>-1</sup>   |                            | <0.001    | 84                       | MR Egger          |
|                   |                           | LV - ESV (ml)    | -0.05 (-0.15; 0.05)                      | 3.5×10 <sup>-1</sup>   |                            | <0.001    | 83                       | IVW               |
|                   |                           | LV - EF (%)      | 0.00 (-0.11; 0.12)                       | 9.4×10 <sup>-1</sup>   |                            | 0.138     | 89                       | MR Egger          |
|                   |                           | LV - EDV (ml)    | 0.92 (0.38; 1.46)                        | 8.0×10 <sup>-4</sup>   |                            | <0.001    | 75                       | MR Egger          |
|                   |                           | LV - EDM (g)     | 0.54 (0.28; 0.80)                        | 6.1×10 <sup>-5</sup>   |                            | <0.001    | 83                       | MR Egger          |
| ERAP2 (Q6P179)    | ERAP2 (ENSG00000164308)   | RV - SV (ml)     | 4.0/4.0 -0.17 (-0.35; 0.01)              | 6.7×10 <sup>-2</sup>   | 7.81×10 <sup>-6</sup>      | 0.002     | 45                       | MR Egger Interval |
|                   |                           | RV - PFR (ml/s)  | -1.35 (-2.41; -0.28)                     | 1.3×10 <sup>-2</sup>   |                            | <0.001    | 42                       | MR Egger          |
|                   |                           | RV - PER (ml/s)  | -0.23 (-0.46; 0.01)                      | 6.1×10 <sup>-2</sup>   |                            | <0.001    | 57                       | IVW               |
|                   |                           | RV - PAFR (ml/s) | 0.13 (-0.65; 0.90)                       | 7.5×10 <sup>-1</sup>   |                            | <0.001    | 55                       | MR Egger          |
|                   |                           | RV - ESV (ml)    | -0.34 (-0.46; -0.23)                     | 1.5×10 <sup>-9</sup>   |                            | 0.039     | 54                       | MR Egger          |
|                   |                           | RV - EF (%)      | 0.10 (0.05; 0.15)                        | 8.1×10 <sup>-5</sup>   |                            | <0.001    | 54                       | MR Egger          |
|                   |                           | RV - EDV (ml)    | -0.35 (-0.58; -0.12)                     | 2.7×10 <sup>-3</sup>   |                            | <0.001    | 47                       | MR Egger          |
|                   |                           | LV - SV (ml)     | -0.01 (-0.14; 0.12)                      | 8.6×10 <sup>-1</sup>   |                            | 0.084     | 54                       | MR Egger          |
|                   |                           | LV - PFR (ml/s)  | 1.90 (1.66; 2.14)                        | 1.0×10 <sup>-100</sup> |                            | <0.001    | 54                       | IVW               |
|                   |                           | LV - PER (ml/s)  | -0.10 (-0.37; 0.17)                      | 4.7×10 <sup>-1</sup>   |                            | <0.001    | 53                       | IVW               |

**Table S15:** Directionally concordant CMR proteins: MR effect estimates of plasma protein effects on sixteen CMR traits. (continued)

| Protein (UniProt) | Gene (ensembl)           | CMR trait        | No. hits/Path. concordance<br>MD (95%CI) | P-value                | Multiple testing threshold | Q p-value | No. variants<br>MR model | PQTL source       |
|-------------------|--------------------------|------------------|------------------------------------------|------------------------|----------------------------|-----------|--------------------------|-------------------|
|                   |                          | LV - PAFR (ml/s) | -0.97 (-1.88; -0.05)                     | 3.9×10 <sup>-2</sup>   |                            | 0.198     | 54                       | MR Egger          |
|                   |                          | LV - MVR (g/ml)  | 0.00 (-0.00; 0.00)                       | 7.0×10 <sup>-1</sup>   |                            | 0.031     | 56                       | MR Egger          |
|                   |                          | LV - ESV (ml)    | -0.00 (-0.12; 0.11)                      | 9.4×10 <sup>-1</sup>   |                            | 0.104     | 57                       | MR Egger          |
|                   |                          | LV - EF (%)      | -0.00 (-0.02; 0.02)                      | 9.3×10 <sup>-1</sup>   |                            | 0.650     | 54                       | IVW               |
|                   |                          | LV - EDV (ml)    | -0.27 (-0.33; -0.20)                     | 4.4×10 <sup>-16</sup>  |                            | 0.003     | 56                       | IVW               |
|                   |                          | LV - EDM (g)     | -0.22 (-0.31; -0.12)                     | 6.7×10 <sup>-6</sup>   |                            | <0.001    | 57                       | MR Egger          |
| ENTP1 (P49961)    | ENTPD1 (ENSG00000138185) | RV - SV (ml)     | 4.0/4.0 -0.89 (-3.25; 1.48)              | 4.6×10 <sup>-1</sup>   | 7.81×10 <sup>-6</sup>      | 0.471     | 9                        | MR Egger Interval |
|                   |                          | RV - PFR (ml/s)  | -8.04 (-9.21; -6.88)                     | 1.0×10 <sup>-100</sup> |                            | 0.980     | 11                       | IVW               |
|                   |                          | RV - PER (ml/s)  | -1.55 (-14.43; 11.33)                    | 8.1×10 <sup>-1</sup>   |                            | 0.857     | 11                       | MR Egger          |
|                   |                          | RV - PAFR (ml/s) | -2.64 (-4.02; -1.26)                     | 1.7×10 <sup>-4</sup>   |                            | 0.903     | 11                       | IVW               |
|                   |                          | RV - ESV (ml)    | -1.15 (-3.92; 1.62)                      | 4.2×10 <sup>-1</sup>   |                            | 0.583     | 8                        | MR Egger          |
|                   |                          | RV - EF (%)      | -0.41 (-0.50; -0.33)                     | 1.0×10 <sup>-100</sup> |                            | 0.576     | 11                       | IVW               |
|                   |                          | RV - EDV (ml)    | -1.21 (-5.71; 3.28)                      | 6.0×10 <sup>-1</sup>   |                            | 0.612     | 8                        | MR Egger          |
|                   |                          | LV - SV (ml)     | 0.03 (-2.39; 2.45)                       | 9.8×10 <sup>-1</sup>   |                            | 0.877     | 9                        | MR Egger          |
|                   |                          | LV - PFR (ml/s)  | -6.76 (-8.09; -5.43)                     | 1.0×10 <sup>-100</sup> |                            | 0.756     | 11                       | IVW               |
|                   |                          | LV - PER (ml/s)  | -6.70 (-8.01; -5.39)                     | 1.0×10 <sup>-100</sup> |                            | 0.844     | 11                       | IVW               |
|                   |                          | LV - PAFR (ml/s) | -18.41 (-34.22; -2.60)                   | 2.3×10 <sup>-2</sup>   |                            | 0.978     | 9                        | MR Egger          |
|                   |                          | LV - MVR (g/ml)  | -0.00 (-0.00; 0.00)                      | 1.3×10 <sup>-1</sup>   |                            | 0.918     | 11                       | IVW               |
|                   |                          | LV - ESV (ml)    | -3.77 (-7.65; 0.10)                      | 5.6×10 <sup>-2</sup>   |                            | 0.032     | 4                        | MR Egger          |
|                   |                          | LV - EF (%)      | 1.11 (0.14; 2.08)                        | 2.5×10 <sup>-2</sup>   |                            | 0.361     | 9                        | MR Egger          |
|                   |                          | LV - EDV (ml)    | -1.27 (-7.19; 4.65)                      | 6.7×10 <sup>-1</sup>   |                            | 0.149     | 6                        | MR Egger          |
|                   |                          | LV - EDM (g)     | 0.04 (-2.06; 2.15)                       | 9.7×10 <sup>-1</sup>   |                            | 0.618     | 9                        | MR Egger          |
| BGH3 (Q15582)     | TGFBI (ENSG00000120708)  | RV - SV (ml)     | 4.0/4.0 1.20 (0.27; 2.13)                | 1.2×10 <sup>-2</sup>   | 7.81×10 <sup>-6</sup>      | 0.831     | 20                       | MR Egger Interval |
|                   |                          | RV - PFR (ml/s)  | 0.67 (-0.19; 1.53)                       | 1.3×10 <sup>-1</sup>   |                            | 0.793     | 19                       | IVW               |
|                   |                          | RV - PER (ml/s)  | -0.31 (-1.20; 0.59)                      | 5.1×10 <sup>-1</sup>   |                            | 0.898     | 19                       | IVW               |
|                   |                          | RV - PAFR (ml/s) | 5.45 (-0.53; 11.43)                      | 7.4×10 <sup>-2</sup>   |                            | 0.420     | 20                       | MR Egger          |
|                   |                          | RV - ESV (ml)    | 0.79 (0.62; 0.95)                        | 1.0×10 <sup>-100</sup> |                            | 0.589     | 19                       | IVW               |
|                   |                          | RV - EF (%)      | -0.13 (-0.20; -0.07)                     | 3.3×10 <sup>-5</sup>   |                            | 0.727     | 19                       | IVW               |
|                   |                          | RV - EDV (ml)    | 1.23 (0.97; 1.50)                        | 1.0×10 <sup>-100</sup> |                            | 0.646     | 19                       | IVW               |
|                   |                          | LV - SV (ml)     | 0.33 (0.17; 0.50)                        | 7.0×10 <sup>-5</sup>   |                            | 0.472     | 19                       | IVW               |
|                   |                          | LV - PFR (ml/s)  | -0.39 (-1.61; 0.83)                      | 5.3×10 <sup>-1</sup>   |                            | 0.198     | 18                       | IVW               |
|                   |                          | LV - PER (ml/s)  | 0.57 (-0.51; 1.64)                       | 3.0×10 <sup>-1</sup>   |                            | 0.422     | 17                       | IVW               |
|                   |                          | LV - PAFR (ml/s) | 0.83 (-5.39; 7.04)                       | 7.9×10 <sup>-1</sup>   |                            | 0.557     | 20                       | MR Egger          |
|                   |                          | LV - MVR (g/ml)  | -0.00 (-0.00; 0.00)                      | 5.1×10 <sup>-1</sup>   |                            | 0.597     | 19                       | IVW               |
|                   |                          | LV - ESV (ml)    | 0.70 (0.55; 0.85)                        | 1.0×10 <sup>-100</sup> |                            | 0.009     | 19                       | IVW               |
|                   |                          | LV - EF (%)      | -0.01 (-0.40; 0.38)                      | 9.7×10 <sup>-1</sup>   |                            | 0.303     | 20                       | MR Egger          |
|                   |                          | LV - EDV (ml)    | 1.02 (0.71; 1.32)                        | 5.1×10 <sup>-11</sup>  |                            | 0.152     | 19                       | IVW               |
|                   |                          | LV - EDM (g)     | 0.63 (-0.26; 1.53)                       | 1.7×10 <sup>-1</sup>   |                            | 0.270     | 20                       | MR Egger          |
| ASAH2 (Q9NR71)    | ASAH2 (ENSG00000188611)  | RV - SV (ml)     | 4.0/4.0 0.63 (0.30; 0.95)                | 1.6×10 <sup>-4</sup>   | 7.81×10 <sup>-6</sup>      | 0.092     | 23                       | MR Egger Interval |
|                   |                          | RV - PFR (ml/s)  | 2.19 (-0.19; 4.57)                       | 7.2×10 <sup>-2</sup>   |                            | 0.228     | 20                       | MR Egger          |
|                   |                          | RV - PER (ml/s)  | -1.66 (-2.70; -0.62)                     | 1.8×10 <sup>-3</sup>   |                            | <0.001    | 23                       | IVW               |
|                   |                          | RV - PAFR (ml/s) | -2.40 (-4.44; -0.36)                     | 2.1×10 <sup>-2</sup>   |                            | 0.034     | 22                       | MR Egger          |
|                   |                          | RV - ESV (ml)    | 0.81 (0.50; 1.13)                        | 3.6×10 <sup>-7</sup>   |                            | 0.216     | 21                       | MR Egger          |
|                   |                          | RV - EF (%)      | -0.14 (-0.21; -0.08)                     | 6.3×10 <sup>-6</sup>   |                            | 0.140     | 24                       | IVW               |
|                   |                          | RV - EDV (ml)    | 1.42 (0.91; 1.93)                        | 4.6×10 <sup>-8</sup>   |                            | 0.178     | 23                       | MR Egger          |
|                   |                          | LV - SV (ml)     | -0.38 (-0.66; -0.10)                     | 8.2×10 <sup>-3</sup>   |                            | <0.001    | 24                       | MR Egger          |
|                   |                          | LV - PFR (ml/s)  | -1.03 (-2.67; 0.61)                      | 2.2×10 <sup>-1</sup>   |                            | 0.652     | 25                       | MR Egger          |
|                   |                          | LV - PER (ml/s)  | 1.98 (0.35; 3.61)                        | 1.7×10 <sup>-2</sup>   |                            | 0.023     | 24                       | MR Egger          |
|                   |                          | LV - PAFR (ml/s) | -4.91 (-7.81; -2.01)                     | 9.0×10 <sup>-4</sup>   |                            | 0.510     | 16                       | MR Egger          |
|                   |                          | LV - MVR (g/ml)  | 0.00 (0.00; 0.00)                        | 1.1×10 <sup>-2</sup>   |                            | 0.008     | 23                       | IVW               |
|                   |                          | LV - ESV (ml)    | 0.26 (0.15; 0.38)                        | 4.0×10 <sup>-6</sup>   |                            | <0.001    | 25                       | IVW               |
|                   |                          | LV - EF (%)      | -0.08 (-0.14; -0.03)                     | 3.5×10 <sup>-3</sup>   |                            | 0.055     | 26                       | IVW               |
|                   |                          | LV - EDV (ml)    | -0.25 (-0.70; 0.20)                      | 2.7×10 <sup>-1</sup>   |                            | <0.001    | 24                       | MR Egger          |
|                   |                          | LV - EDM (g)     | -0.39 (-0.68; -0.10)                     | 8.1×10 <sup>-3</sup>   |                            | 0.098     | 24                       | MR Egger          |
| TPSNR (Q9BX59)    | TAPBPL (ENSG00000139192) | RV - SV (ml)     | 3.0/3.0 -0.17 (-0.23; -0.11)             | 1.2×10 <sup>-7</sup>   | 7.81×10 <sup>-6</sup>      | 0.016     | 60                       | IVW Interval      |
|                   |                          | RV - PFR (ml/s)  | -0.53 (-0.87; -0.20)                     | 1.5×10 <sup>-3</sup>   |                            | 0.035     | 59                       | IVW               |
|                   |                          | RV - PER (ml/s)  | -0.81 (-1.21; -0.42)                     | 5.2×10 <sup>-5</sup>   |                            | 0.038     | 53                       | IVW               |
|                   |                          | RV - PAFR (ml/s) | 1.29 (0.22; 2.35)                        | 1.8×10 <sup>-2</sup>   |                            | 0.037     | 53                       | MR Egger          |
|                   |                          | RV - ESV (ml)    | -0.13 (-0.30; 0.04)                      | 1.4×10 <sup>-1</sup>   |                            | 0.185     | 55                       | MR Egger          |
|                   |                          | RV - EF (%)      | 0.07 (0.02; 0.12)                        | 8.3×10 <sup>-3</sup>   |                            | 0.015     | 59                       | MR Egger          |
|                   |                          | RV - EDV (ml)    | -0.35 (-0.62; -0.08)                     | 1.2×10 <sup>-2</sup>   |                            | 0.014     | 55                       | MR Egger          |
|                   |                          | LV - SV (ml)     | -0.16 (-0.22; -0.10)                     | 1.5×10 <sup>-7</sup>   |                            | 0.002     | 62                       | IVW               |

**Table S15:** Directionally concordant CMR proteins: MR effect estimates of plasma protein effects on sixteen CMR traits. (*continued*)

| Protein (UniProt) | Gene (ensembl)              | CMR trait        | No. hits/Path. concordance<br>MD (95%CI) | P-value               | Multiple testing threshold | Q p-value            | No. variants<br>MR model | PQTL source |          |          |         |
|-------------------|-----------------------------|------------------|------------------------------------------|-----------------------|----------------------------|----------------------|--------------------------|-------------|----------|----------|---------|
|                   |                             | LV - PFR (ml/s)  | -0.46 (-1.28; 0.37)                      | $2.8 \times 10^{-1}$  | 0.023                      | 57                   | MR Egger                 |             |          |          |         |
|                   |                             | LV - PER (ml/s)  | -1.04 (-1.98; -0.11)                     | $2.8 \times 10^{-2}$  | 0.092                      | 57                   | MR Egger                 |             |          |          |         |
|                   |                             | LV - PAFR (ml/s) | -0.00 (-0.49; 0.48)                      | $9.9 \times 10^{-1}$  | 0.022                      | 53                   | IVW                      |             |          |          |         |
|                   |                             | LV - MVR (g/ml)  | 0.00 (0.00; 0.00)                        | $6.1 \times 10^{-10}$ | 0.011                      | 57                   | IVW                      |             |          |          |         |
|                   |                             | LV - ESV (ml)    | -0.12 (-0.18; -0.05)                     | $3.0 \times 10^{-4}$  | <0.001                     | 58                   | IVW                      |             |          |          |         |
|                   |                             | LV - EF (%)      | 0.09 (0.04; 0.15)                        | $1.0 \times 10^{-3}$  | 0.019                      | 56                   | MR Egger                 |             |          |          |         |
|                   |                             | LV - EDV (ml)    | -0.46 (-0.71; -0.21)                     | $3.3 \times 10^{-4}$  | 0.074                      | 55                   | MR Egger                 |             |          |          |         |
|                   |                             | LV - EDM (g)     | -0.06 (-0.12; 0.01)                      | $8.2 \times 10^{-2}$  | 0.451                      | 55                   | IVW                      |             |          |          |         |
|                   |                             | TIE2 (Q02763)    | TEK (ENSG00000120156)                    | RV - SV (ml)          | 3.0/3.0 0.02 (-0.35; 0.39) | $9.1 \times 10^{-1}$ | $7.81 \times 10^{-6}$    | <0.001      | 52       | MR Egger | Scallop |
|                   |                             |                  |                                          | RV - PFR (ml/s)       | -2.80 (-5.15; -0.46)       | $1.9 \times 10^{-2}$ | 0.018                    | 49          | MR Egger |          |         |
|                   |                             |                  |                                          | RV - PER (ml/s)       | 0.22 (-2.02; 2.46)         | $8.5 \times 10^{-1}$ | <0.001                   | 47          | MR Egger |          |         |
| RV - PAFR (ml/s)  | 5.47 (4.15; 6.79)           |                  |                                          | $4.4 \times 10^{-16}$ | <0.001                     | 54                   | IVW                      |             |          |          |         |
| RV - ESV (ml)     | -0.68 (-0.89; -0.48)        |                  |                                          | $4.1 \times 10^{-11}$ | <0.001                     | 48                   | IVW                      |             |          |          |         |
| RV - EF (%)       | -0.03 (-0.15; 0.10)         |                  |                                          | $6.8 \times 10^{-1}$  | 0.015                      | 53                   | MR Egger                 |             |          |          |         |
| RV - EDV (ml)     | -0.02 (-0.56; 0.52)         |                  |                                          | $9.4 \times 10^{-1}$  | <0.001                     | 55                   | MR Egger                 |             |          |          |         |
| LV - SV (ml)      | 0.23 (-0.16; 0.62)          |                  |                                          | $2.4 \times 10^{-1}$  | <0.001                     | 48                   | MR Egger                 |             |          |          |         |
| LV - PFR (ml/s)   | -0.48 (-2.45; 1.49)         |                  |                                          | $6.3 \times 10^{-1}$  | <0.001                     | 52                   | MR Egger                 |             |          |          |         |
| LV - PER (ml/s)   | -0.12 (-2.54; 2.30)         |                  |                                          | $9.2 \times 10^{-1}$  | <0.001                     | 48                   | MR Egger                 |             |          |          |         |
| LV - PAFR (ml/s)  | 1.81 (0.57; 3.05)           |                  |                                          | $4.2 \times 10^{-3}$  | <0.001                     | 55                   | IVW                      |             |          |          |         |
| LV - MVR (g/ml)   | -0.00 (-0.00; -0.00)        |                  |                                          | $4.6 \times 10^{-2}$  | 0.011                      | 52                   | MR Egger                 |             |          |          |         |
| LV - ESV (ml)     | -0.34 (-0.74; 0.06)         |                  |                                          | $9.4 \times 10^{-2}$  | <0.001                     | 44                   | MR Egger                 |             |          |          |         |
| LV - EF (%)       | 0.43 (0.32; 0.55)           |                  |                                          | $8.9 \times 10^{-13}$ | <0.001                     | 49                   | MR Egger                 |             |          |          |         |
| LV - EDV (ml)     | 0.20 (-0.50; 0.90)          |                  |                                          | $5.7 \times 10^{-1}$  | 0.013                      | 50                   | MR Egger                 |             |          |          |         |
| LV - EDM (g)      | -0.14 (-0.53; 0.25)         |                  |                                          | $4.7 \times 10^{-1}$  | <0.001                     | 46                   | MR Egger                 |             |          |          |         |
| SPA12 (Q8IW75)    | SERPINA12 (ENSG00000165953) | RV - SV (ml)     | 3.0/3.0 0.55 (-0.58; 1.67)               | $3.4 \times 10^{-1}$  | $7.81 \times 10^{-6}$      | 0.068                | 20                       | MR Egger    | Interval |          |         |
|                   |                             | RV - PFR (ml/s)  | 2.74 (1.41; 4.08)                        | $5.5 \times 10^{-5}$  | 0.120                      | 19                   | IVW                      |             |          |          |         |
|                   |                             | RV - PER (ml/s)  | -1.10 (-2.26; 0.07)                      | $6.5 \times 10^{-2}$  | <0.001                     | 18                   | IVW                      |             |          |          |         |
|                   |                             | RV - PAFR (ml/s) | 0.42 (-5.36; 6.19)                       | $8.9 \times 10^{-1}$  | 0.048                      | 20                   | MR Egger                 |             |          |          |         |
|                   |                             | RV - ESV (ml)    | -0.82 (-1.02; -0.62)                     | $1.6 \times 10^{-15}$ | 0.954                      | 20                   | IVW                      |             |          |          |         |
|                   |                             | RV - EF (%)      | 0.33 (0.25; 0.42)                        | $2.0 \times 10^{-15}$ | 0.270                      | 20                   | IVW                      |             |          |          |         |
|                   |                             | RV - EDV (ml)    | 0.16 (-1.36; 1.67)                       | $8.4 \times 10^{-1}$  | 0.572                      | 20                   | MR Egger                 |             |          |          |         |
|                   |                             | LV - SV (ml)     | -0.24 (-0.48; 0.01)                      | $5.6 \times 10^{-2}$  | 0.092                      | 20                   | IVW                      |             |          |          |         |
|                   |                             | LV - PFR (ml/s)  | -1.48 (-2.68; -0.27)                     | $1.6 \times 10^{-2}$  | <0.001                     | 20                   | IVW                      |             |          |          |         |
|                   |                             | LV - PER (ml/s)  | -0.31 (-1.49; 0.87)                      | $6.0 \times 10^{-1}$  | 0.035                      | 20                   | IVW                      |             |          |          |         |
|                   |                             | LV - PAFR (ml/s) | 3.36 (1.86; 4.86)                        | $1.2 \times 10^{-5}$  | 0.161                      | 20                   | IVW                      |             |          |          |         |
|                   |                             | LV - MVR (g/ml)  | 0.00 (-0.00; 0.01)                       | $9.2 \times 10^{-2}$  | 0.596                      | 20                   | MR Egger                 |             |          |          |         |
|                   |                             | LV - ESV (ml)    | -0.49 (-1.37; 0.39)                      | $2.7 \times 10^{-1}$  | 0.728                      | 19                   | MR Egger                 |             |          |          |         |
|                   |                             | LV - EF (%)      | 0.12 (0.03; 0.22)                        | $8.3 \times 10^{-3}$  | 0.110                      | 19                   | IVW                      |             |          |          |         |
|                   |                             | LV - EDV (ml)    | -0.76 (-1.07; -0.44)                     | $3.6 \times 10^{-6}$  | 0.712                      | 20                   | IVW                      |             |          |          |         |
|                   |                             | LV - EDM (g)     | -0.19 (-0.39; 0.02)                      | $8.2 \times 10^{-2}$  | 0.099                      | 20                   | IVW                      |             |          |          |         |
| RMD1 (Q96DB5)     | RMDN1 (ENSG00000176623)     | RV - SV (ml)     | 3.0/3.0 -3.53 (-5.13; -1.94)             | $1.4 \times 10^{-5}$  | $7.81 \times 10^{-6}$      | 0.350                | 8                        | MR Egger    | Interval |          |         |
|                   |                             | RV - PFR (ml/s)  | -1.94 (-3.60; -0.28)                     | $2.2 \times 10^{-2}$  | 0.962                      | 8                    | IVW                      |             |          |          |         |
|                   |                             | RV - PER (ml/s)  | -6.15 (-8.35; -3.96)                     | $3.7 \times 10^{-8}$  | 0.128                      | 8                    | IVW                      |             |          |          |         |
|                   |                             | RV - PAFR (ml/s) | -21.81 (-34.60; -9.02)                   | $8.3 \times 10^{-4}$  | 0.096                      | 8                    | MR Egger                 |             |          |          |         |
|                   |                             | RV - ESV (ml)    | -0.25 (-0.57; 0.06)                      | $1.2 \times 10^{-1}$  | 0.932                      | 8                    | IVW                      |             |          |          |         |
|                   |                             | RV - EF (%)      | -0.22 (-0.35; -0.09)                     | $7.5 \times 10^{-4}$  | 0.346                      | 8                    | IVW                      |             |          |          |         |
|                   |                             | RV - EDV (ml)    | -4.91 (-7.41; -2.40)                     | $1.2 \times 10^{-4}$  | 0.906                      | 8                    | MR Egger                 |             |          |          |         |
|                   |                             | LV - SV (ml)     | -2.89 (-4.43; -1.34)                     | $2.5 \times 10^{-4}$  | 0.696                      | 8                    | MR Egger                 |             |          |          |         |
|                   |                             | LV - PFR (ml/s)  | -6.96 (-8.86; -5.06)                     | $7.0 \times 10^{-13}$ | 0.575                      | 8                    | IVW                      |             |          |          |         |
|                   |                             | LV - PER (ml/s)  | -16.30 (-25.38; -7.22)                   | $4.3 \times 10^{-4}$  | 0.874                      | 8                    | MR Egger                 |             |          |          |         |
|                   |                             | LV - PAFR (ml/s) | -1.57 (-3.64; 0.51)                      | $1.4 \times 10^{-1}$  | 0.685                      | 8                    | IVW                      |             |          |          |         |
|                   |                             | LV - MVR (g/ml)  | 0.00 (0.00; 0.00)                        | $1.2 \times 10^{-3}$  | 0.783                      | 8                    | IVW                      |             |          |          |         |
|                   |                             | LV - ESV (ml)    | 0.45 (0.15; 0.74)                        | $3.1 \times 10^{-3}$  | 0.995                      | 8                    | IVW                      |             |          |          |         |
|                   |                             | LV - EF (%)      | -0.40 (-0.52; -0.28)                     | $1.3 \times 10^{-10}$ | 0.786                      | 8                    | IVW                      |             |          |          |         |
|                   |                             | LV - EDV (ml)    | -2.89 (-5.34; -0.43)                     | $2.1 \times 10^{-2}$  | 0.826                      | 8                    | MR Egger                 |             |          |          |         |
|                   |                             | LV - EDM (g)     | 0.21 (-0.07; 0.48)                       | $1.4 \times 10^{-1}$  | 0.490                      | 8                    | IVW                      |             |          |          |         |
| PPAC (P24666)     | ACP1 (ENSG00000143727)      | RV - SV (ml)     | 3.0/3.0 0.19 (0.12; 0.25)                | $1.7 \times 10^{-7}$  | $7.81 \times 10^{-6}$      | 0.009                | 51                       | IVW         | Interval |          |         |
|                   |                             | RV - PFR (ml/s)  | 0.20 (-0.55; 0.95)                       | $6.1 \times 10^{-1}$  | 0.012                      | 53                   | MR Egger                 |             |          |          |         |
|                   |                             | RV - PER (ml/s)  | 0.22 (-0.55; 0.99)                       | $5.7 \times 10^{-1}$  | 0.651                      | 55                   | MR Egger                 |             |          |          |         |
|                   |                             | RV - PAFR (ml/s) | 1.50 (0.58; 2.41)                        | $1.3 \times 10^{-3}$  | 0.288                      | 56                   | MR Egger                 |             |          |          |         |
|                   |                             | RV - ESV (ml)    | 0.04 (-0.03; 0.11)                       | $2.9 \times 10^{-1}$  | <0.001                     | 53                   | IVW                      |             |          |          |         |
|                   |                             | RV - EF (%)      | -0.01 (-0.03; 0.02)                      | $6.4 \times 10^{-1}$  | 0.002                      | 51                   | IVW                      |             |          |          |         |



**Table S15:** Directionally concordant CMR proteins: MR effect estimates of plasma protein effects on sixteen CMR traits. (*continued*)

| Protein (UniProt) | Gene (ensembl)           | CMR trait        | No. hits/Path. concordance<br>MD (95%CI) | P-value               | Multiple testing threshold | Q p-value | No. variants<br>MR model | PQTL source  |
|-------------------|--------------------------|------------------|------------------------------------------|-----------------------|----------------------------|-----------|--------------------------|--------------|
|                   |                          | RV - EDV (ml)    | -0.06 (-0.29; 0.17)                      | 5.9×10 <sup>-3</sup>  |                            | 0.010     | 55                       | MR Egger     |
|                   |                          | LV - SV (ml)     | 0.05 (-0.12; 0.21)                       | 5.8×10 <sup>-3</sup>  |                            | 0.086     | 55                       | MR Egger     |
|                   |                          | LV - PFR (ml/s)  | 1.22 (0.75; 1.70)                        | 4.1×10 <sup>-7</sup>  |                            | 0.106     | 52                       | IWV          |
|                   |                          | LV - PER (ml/s)  | 1.11 (0.71; 1.52)                        | 7.8×10 <sup>-8</sup>  |                            | 0.008     | 53                       | IWV          |
|                   |                          | LV - PAFR (ml/s) | 1.01 (0.05; 1.97)                        | 3.8×10 <sup>-2</sup>  |                            | <0.001    | 53                       | MR Egger     |
|                   |                          | LV - MVR (g/ml)  | -0.00 (-0.00; 0.00)                      | 9.6×10 <sup>-3</sup>  |                            | 0.002     | 50                       | IWV          |
|                   |                          | LV - ESV (ml)    | -0.03 (-0.16; 0.10)                      | 6.8×10 <sup>-3</sup>  |                            | 0.716     | 56                       | MR Egger     |
|                   |                          | LV - EF (%)      | -0.01 (-0.07; 0.04)                      | 6.8×10 <sup>-3</sup>  |                            | 0.852     | 56                       | MR Egger     |
|                   |                          | LV - EDV (ml)    | 0.01 (-0.24; 0.25)                       | 9.6×10 <sup>-3</sup>  |                            | 0.137     | 56                       | MR Egger     |
|                   |                          | LV - EDM (g)     | 0.14 (0.02; 0.26)                        | 2.6×10 <sup>-2</sup>  |                            | 0.498     | 56                       | MR Egger     |
| PATE4 (P0C8F1)    | PATE4 (ENSG00000237353)  | RV - SV (ml)     | 3.0/3.0 -0.07 (-0.20; 0.07)              | 3.2×10 <sup>-3</sup>  | 7.81×10 <sup>-6</sup>      | 0.002     | 28                       | IWV Interval |
|                   |                          | RV - PFR (ml/s)  | -1.57 (-2.30; -0.84)                     | 2.3×10 <sup>-5</sup>  |                            | <0.001    | 29                       | IWV          |
|                   |                          | RV - PER (ml/s)  | -2.06 (-2.67; -1.44)                     | 6.4×10 <sup>-11</sup> |                            | 0.029     | 35                       | IWV          |
|                   |                          | RV - PAFR (ml/s) | 0.61 (-0.30; 1.52)                       | 1.9×10 <sup>-3</sup>  |                            | 0.159     | 30                       | IWV          |
|                   |                          | RV - ESV (ml)    | 0.45 (0.29; 0.60)                        | 1.2×10 <sup>-8</sup>  |                            | 0.006     | 28                       | IWV          |
|                   |                          | RV - EF (%)      | -0.17 (-0.23; -0.11)                     | 2.4×10 <sup>-8</sup>  |                            | <0.001    | 28                       | IWV          |
|                   |                          | RV - EDV (ml)    | 0.40 (0.21; 0.59)                        | 3.8×10 <sup>-5</sup>  |                            | <0.001    | 30                       | IWV          |
|                   |                          | LV - SV (ml)     | 0.11 (-0.01; 0.23)                       | 7.0×10 <sup>-2</sup>  |                            | 0.009     | 34                       | IWV          |
|                   |                          | LV - PFR (ml/s)  | -1.24 (-3.84; 1.36)                      | 3.5×10 <sup>-3</sup>  |                            | <0.001    | 31                       | MR Egger     |
|                   |                          | LV - PER (ml/s)  | 1.70 (0.92; 2.48)                        | 1.9×10 <sup>-5</sup>  |                            | <0.001    | 31                       | IWV          |
|                   |                          | LV - PAFR (ml/s) | -0.31 (-3.18; 2.57)                      | 8.3×10 <sup>-3</sup>  |                            | <0.001    | 28                       | MR Egger     |
|                   |                          | LV - MVR (g/ml)  | -0.00 (-0.00; 0.00)                      | 3.1×10 <sup>-3</sup>  |                            | 0.169     | 32                       | MR Egger     |
|                   |                          | LV - ESV (ml)    | 0.04 (-0.39; 0.48)                       | 8.5×10 <sup>-3</sup>  |                            | <0.001    | 31                       | MR Egger     |
|                   |                          | LV - EF (%)      | -0.17 (-0.35; 0.00)                      | 5.6×10 <sup>-2</sup>  |                            | 0.276     | 31                       | MR Egger     |
|                   |                          | LV - EDV (ml)    | -0.26 (-1.00; 0.49)                      | 5.0×10 <sup>-3</sup>  |                            | 0.002     | 31                       | MR Egger     |
|                   |                          | LV - EDM (g)     | -0.10 (-0.48; 0.27)                      | 5.9×10 <sup>-3</sup>  |                            | 0.003     | 31                       | MR Egger     |
| NCAM2 (O15394)    | NCAM2 (ENSG00000154654)  | RV - SV (ml)     | 3.0/3.0 -0.03 (-0.24; 0.17)              | 7.5×10 <sup>-3</sup>  | 7.81×10 <sup>-6</sup>      | 0.467     | 31                       | IWV Interval |
|                   |                          | RV - PFR (ml/s)  | -1.61 (-5.44; 2.23)                      | 4.1×10 <sup>-3</sup>  |                            | 0.098     | 31                       | MR Egger     |
|                   |                          | RV - PER (ml/s)  | 5.24 (1.80; 8.67)                        | 2.8×10 <sup>-3</sup>  |                            | 0.011     | 30                       | MR Egger     |
|                   |                          | RV - PAFR (ml/s) | -1.26 (-5.13; 2.61)                      | 5.2×10 <sup>-3</sup>  |                            | 0.045     | 32                       | MR Egger     |
|                   |                          | RV - ESV (ml)    | 0.25 (-0.43; 0.94)                       | 4.7×10 <sup>-3</sup>  |                            | 0.644     | 30                       | MR Egger     |
|                   |                          | RV - EF (%)      | -0.06 (-0.37; 0.24)                      | 6.8×10 <sup>-3</sup>  |                            | 0.054     | 31                       | MR Egger     |
|                   |                          | RV - EDV (ml)    | -0.84 (-1.20; -0.49)                     | 3.0×10 <sup>-6</sup>  |                            | 0.055     | 33                       | IWV          |
|                   |                          | LV - SV (ml)     | 0.86 (0.09; 1.63)                        | 2.8×10 <sup>-2</sup>  |                            | 0.174     | 30                       | MR Egger     |
|                   |                          | LV - PFR (ml/s)  | -2.00 (-6.89; 2.89)                      | 4.2×10 <sup>-3</sup>  |                            | 0.069     | 30                       | MR Egger     |
|                   |                          | LV - PER (ml/s)  | 9.39 (5.46; 13.31)                       | 2.7×10 <sup>-6</sup>  |                            | 0.277     | 32                       | MR Egger     |
|                   |                          | LV - PAFR (ml/s) | 4.10 (2.54; 5.66)                        | 2.5×10 <sup>-7</sup>  |                            | 0.024     | 30                       | IWV          |
|                   |                          | LV - MVR (g/ml)  | -0.00 (-0.01; 0.00)                      | 2.2×10 <sup>-3</sup>  |                            | <0.001    | 31                       | MR Egger     |
|                   |                          | LV - ESV (ml)    | -0.00 (-0.17; 0.17)                      | 9.8×10 <sup>-3</sup>  |                            | 0.468     | 34                       | IWV          |
|                   |                          | LV - EF (%)      | 0.29 (0.05; 0.53)                        | 1.9×10 <sup>-2</sup>  |                            | 0.859     | 32                       | MR Egger     |
|                   |                          | LV - EDV (ml)    | 0.61 (-0.53; 1.76)                       | 2.9×10 <sup>-3</sup>  |                            | 0.316     | 30                       | MR Egger     |
|                   |                          | LV - EDM (g)     | -0.25 (-0.88; 0.38)                      | 4.4×10 <sup>-3</sup>  |                            | 0.402     | 29                       | MR Egger     |
| KAT3 (Q6YP21)     | CCBL2 (ENSG00000137944)  | RV - SV (ml)     | 3.0/3.0 -0.69 (-1.52; 0.13)              | 9.8×10 <sup>-2</sup>  | 7.81×10 <sup>-6</sup>      | 0.178     | 5                        | IWV Interval |
|                   |                          | RV - PFR (ml/s)  | -10.05 (-13.56; -6.54)                   | 2.0×10 <sup>-8</sup>  |                            | 0.705     | 5                        | IWV          |
|                   |                          | RV - PER (ml/s)  | -25.14 (-66.70; 16.42)                   | 2.4×10 <sup>-3</sup>  |                            | 0.462     | 5                        | MR Egger     |
|                   |                          | RV - PAFR (ml/s) | -4.65 (-10.13; 0.83)                     | 9.7×10 <sup>-2</sup>  |                            | 0.137     | 5                        | IWV          |
|                   |                          | RV - ESV (ml)    | -5.33 (-12.95; 2.29)                     | 1.7×10 <sup>-3</sup>  |                            | 0.932     | 5                        | MR Egger     |
|                   |                          | RV - EF (%)      | -0.88 (-1.13; -0.63)                     | 1.2×10 <sup>-11</sup> |                            | 0.573     | 5                        | IWV          |
|                   |                          | RV - EDV (ml)    | -8.07 (-20.43; 4.28)                     | 2.0×10 <sup>-3</sup>  |                            | 0.851     | 5                        | MR Egger     |
|                   |                          | LV - SV (ml)     | -7.32 (-17.15; 2.51)                     | 1.4×10 <sup>-3</sup>  |                            | 0.172     | 5                        | MR Egger     |
|                   |                          | LV - PFR (ml/s)  | -9.20 (-13.21; -5.19)                    | 6.9×10 <sup>-6</sup>  |                            | 0.942     | 5                        | IWV          |
|                   |                          | LV - PER (ml/s)  | -0.65 (-4.59; 3.29)                      | 7.5×10 <sup>-3</sup>  |                            | 0.709     | 5                        | IWV          |
|                   |                          | LV - PAFR (ml/s) | 10.19 (4.68; 15.69)                      | 2.9×10 <sup>-4</sup>  |                            | 0.175     | 5                        | IWV          |
|                   |                          | LV - MVR (g/ml)  | 0.05 (0.01; 0.09)                        | 2.0×10 <sup>-2</sup>  |                            | 0.587     | 5                        | MR Egger     |
|                   |                          | LV - ESV (ml)    | -9.97 (-17.07; -2.86)                    | 6.0×10 <sup>-3</sup>  |                            | 0.882     | 5                        | MR Egger     |
|                   |                          | LV - EF (%)      | -0.44 (-0.77; -0.12)                     | 7.5×10 <sup>-3</sup>  |                            | 0.172     | 5                        | IWV          |
|                   |                          | LV - EDV (ml)    | -17.00 (-29.11; -4.90)                   | 5.9×10 <sup>-3</sup>  |                            | 0.670     | 5                        | MR Egger     |
|                   |                          | LV - EDM (g)     | -0.45 (-1.03; 0.13)                      | 1.3×10 <sup>-3</sup>  |                            | 0.528     | 5                        | IWV          |
| ISK2 (P20155)     | SPINK2 (ENSG00000128040) | RV - SV (ml)     | 3.0/3.0 0.23 (-0.08; 0.55)               | 1.5×10 <sup>-3</sup>  | 7.81×10 <sup>-6</sup>      | 0.785     | 21                       | IWV Interval |
|                   |                          | RV - PFR (ml/s)  | 0.30 (-1.56; 2.16)                       | 7.5×10 <sup>-3</sup>  |                            | 0.826     | 20                       | IWV          |
|                   |                          | RV - PER (ml/s)  | -0.71 (-8.29; 6.86)                      | 8.5×10 <sup>-3</sup>  |                            | 0.326     | 22                       | MR Egger     |
|                   |                          | RV - PAFR (ml/s) | -1.48 (-3.48; 0.51)                      | 1.4×10 <sup>-3</sup>  |                            | 0.859     | 21                       | IWV          |

**Table S15:** Directionally concordant CMR proteins: MR effect estimates of plasma protein effects on sixteen CMR traits. (*continued*)

| Protein (UniProt) | Gene (ensembl)         | CMR trait        | No. hits/Path. concordance<br>MD (95%CI) | P-value                | Multiple testing threshold  | Q p-value            | No. variants<br>MR model | PQTL source |            |          |          |
|-------------------|------------------------|------------------|------------------------------------------|------------------------|-----------------------------|----------------------|--------------------------|-------------|------------|----------|----------|
|                   |                        | RV - ESV (ml)    | 1.35 (0.95; 1.74)                        | 2.2×10 <sup>-11</sup>  | 0.069                       | 21                   | IVW                      |             |            |          |          |
|                   |                        | RV - EF (%)      | -0.37 (-0.49; -0.25)                     | 3.4×10 <sup>-9</sup>   | 0.792                       | 21                   | IVW                      |             |            |          |          |
|                   |                        | RV - EDV (ml)    | 1.61 (1.04; 2.17)                        | 2.4×10 <sup>-8</sup>   | 0.270                       | 21                   | IVW                      |             |            |          |          |
|                   |                        | LV - SV (ml)     | -0.10 (-1.43; 1.24)                      | 8.9×10 <sup>-1</sup>   | 0.422                       | 22                   | MR Egger                 |             |            |          |          |
|                   |                        | LV - PFR (ml/s)  | 3.44 (-4.44; 11.32)                      | 3.9×10 <sup>-1</sup>   | 0.881                       | 22                   | MR Egger                 |             |            |          |          |
|                   |                        | LV - PER (ml/s)  | 3.08 (-4.66; 10.82)                      | 4.4×10 <sup>-1</sup>   | 0.553                       | 22                   | MR Egger                 |             |            |          |          |
|                   |                        | LV - PAFR (ml/s) | 4.64 (-4.16; 13.44)                      | 3.0×10 <sup>-1</sup>   | 0.400                       | 22                   | MR Egger                 |             |            |          |          |
|                   |                        | LV - MVR (g/ml)  | 0.00 (-0.01; 0.01)                       | 9.8×10 <sup>-1</sup>   | 0.816                       | 22                   | MR Egger                 |             |            |          |          |
|                   |                        | LV - ESV (ml)    | -0.11 (-1.34; 1.12)                      | 8.6×10 <sup>-1</sup>   | 0.469                       | 22                   | MR Egger                 |             |            |          |          |
|                   |                        | LV - EF (%)      | 0.14 (-0.38; 0.65)                       | 6.0×10 <sup>-1</sup>   | 0.407                       | 22                   | MR Egger                 |             |            |          |          |
|                   |                        | LV - EDV (ml)    | -0.28 (-2.38; 1.81)                      | 7.9×10 <sup>-1</sup>   | 0.457                       | 22                   | MR Egger                 |             |            |          |          |
|                   |                        | LV - EDM (g)     | -0.04 (-0.35; 0.28)                      | 8.1×10 <sup>-1</sup>   | 0.923                       | 20                   | IVW                      |             |            |          |          |
|                   |                        | EPHA1 (P21709)   | EPHA1 (ENSG00000146904)                  | RV - SV (ml)           | 3.0/3.0 -0.04 (-0.66; 0.57) | 8.9×10 <sup>-1</sup> | 7.81×10 <sup>-6</sup>    | 0.616       | 16         | MR Egger | Interval |
|                   |                        |                  |                                          | RV - PFR (ml/s)        | 0.58 (-2.72; 3.89)          | 7.3×10 <sup>-1</sup> | 0.591                    | 16          | MR Egger   |          |          |
|                   |                        |                  |                                          | RV - PER (ml/s)        | -1.26 (-4.70; 2.18)         | 4.7×10 <sup>-1</sup> | 0.553                    | 16          | MR Egger   |          |          |
|                   |                        |                  |                                          | RV - PAFR (ml/s)       | 3.38 (1.59; 5.18)           | 2.3×10 <sup>-4</sup> | 0.099                    | 17          | IVW        |          |          |
| RV - ESV (ml)     | -0.71 (-1.42; 0.00)    |                  |                                          | 5.1×10 <sup>-2</sup>   | 0.239                       | 14                   | MR Egger                 |             |            |          |          |
| RV - EF (%)       | 0.42 (0.30; 0.53)      |                  |                                          | 1.3×10 <sup>-12</sup>  | 0.167                       | 16                   | IVW                      |             |            |          |          |
| RV - EDV (ml)     | -0.82 (-1.20; -0.43)   |                  |                                          | 3.7×10 <sup>-5</sup>   | 0.543                       | 17                   | IVW                      |             |            |          |          |
| LV - SV (ml)      | 0.23 (-0.01; 0.47)     |                  |                                          | 5.8×10 <sup>-2</sup>   | 0.039                       | 17                   | IVW                      |             |            |          |          |
| LV - PFR (ml/s)   | -1.46 (-6.24; 3.33)    |                  |                                          | 5.5×10 <sup>-1</sup>   | 0.069                       | 16                   | MR Egger                 |             |            |          |          |
| LV - PER (ml/s)   | -2.31 (-6.02; 1.40)    |                  |                                          | 2.2×10 <sup>-1</sup>   | 0.027                       | 16                   | MR Egger                 |             |            |          |          |
| LV - PAFR (ml/s)  | 1.00 (-0.56; 2.56)     |                  |                                          | 2.1×10 <sup>-1</sup>   | 0.451                       | 17                   | IVW                      |             |            |          |          |
| LV - MVR (g/ml)   | 0.00 (-0.00; 0.00)     |                  |                                          | 5.1×10 <sup>-1</sup>   | 0.005                       | 17                   | IVW                      |             |            |          |          |
| LV - ESV (ml)     | -0.71 (-0.96; -0.45)   |                  |                                          | 3.3×10 <sup>-8</sup>   | 0.217                       | 17                   | IVW                      |             |            |          |          |
| LV - EF (%)       | 0.34 (0.24; 0.43)      |                  |                                          | 6.0×10 <sup>-13</sup>  | 0.042                       | 17                   | IVW                      |             |            |          |          |
| LV - EDV (ml)     | -0.49 (-0.89; -0.09)   |                  |                                          | 1.7×10 <sup>-2</sup>   | 0.335                       | 17                   | IVW                      |             |            |          |          |
| LV - EDM (g)      | -0.16 (-0.41; 0.08)    |                  |                                          | 1.9×10 <sup>-1</sup>   | 0.148                       | 17                   | IVW                      |             |            |          |          |
| CHLE (P06276)     | BCHL (ENSG00000114200) | RV - SV (ml)     | 3.0/3.0 -0.16 (-0.69; 0.36)              | 5.4×10 <sup>-1</sup>   | 7.81×10 <sup>-6</sup>       | 0.883                | 17                       | MR Egger    | Framingham |          |          |
|                   |                        | RV - PFR (ml/s)  | -0.25 (-0.57; 0.06)                      | 1.1×10 <sup>-1</sup>   | 0.038                       | 24                   | IVW                      |             |            |          |          |
|                   |                        | RV - PER (ml/s)  | 1.67 (-2.65; 5.98)                       | 4.5×10 <sup>-1</sup>   | 0.218                       | 12                   | MR Egger                 |             |            |          |          |
|                   |                        | RV - PAFR (ml/s) | -1.33 (-1.78; -0.88)                     | 6.3×10 <sup>-9</sup>   | 0.519                       | 24                   | IVW                      |             |            |          |          |
|                   |                        | RV - ESV (ml)    | -0.80 (-1.18; -0.42)                     | 4.1×10 <sup>-5</sup>   | 0.002                       | 20                   | MR Egger                 |             |            |          |          |
|                   |                        | RV - EF (%)      | 0.04 (-0.03; 0.11)                       | 3.0×10 <sup>-1</sup>   | 0.024                       | 20                   | IVW                      |             |            |          |          |
|                   |                        | RV - EDV (ml)    | 0.42 (0.33; 0.52)                        | 1.0×10 <sup>-100</sup> | <0.001                      | 23                   | IVW                      |             |            |          |          |
|                   |                        | LV - SV (ml)     | -0.72 (-1.53; 0.10)                      | 8.6×10 <sup>-2</sup>   | 0.150                       | 15                   | MR Egger                 |             |            |          |          |
|                   |                        | LV - PFR (ml/s)  | -0.37 (-0.72; -0.03)                     | 3.6×10 <sup>-2</sup>   | 0.677                       | 26                   | IVW                      |             |            |          |          |
|                   |                        | LV - PER (ml/s)  | -2.42 (-8.59; 3.74)                      | 4.4×10 <sup>-1</sup>   | 0.990                       | 8                    | MR Egger                 |             |            |          |          |
|                   |                        | LV - PAFR (ml/s) | -4.03 (-5.67; -2.38)                     | 1.6×10 <sup>-6</sup>   | 0.347                       | 17                   | IVW                      |             |            |          |          |
|                   |                        | LV - MVR (g/ml)  | 0.00 (-0.00; 0.00)                       | 5.3×10 <sup>-1</sup>   | 0.278                       | 26                   | IVW                      |             |            |          |          |
|                   |                        | LV - ESV (ml)    | -0.47 (-1.28; 0.33)                      | 2.5×10 <sup>-1</sup>   | 0.495                       | 11                   | MR Egger                 |             |            |          |          |
|                   |                        | LV - EF (%)      | -0.20 (-0.37; -0.03)                     | 2.2×10 <sup>-2</sup>   | 0.025                       | 20                   | MR Egger                 |             |            |          |          |
|                   |                        | LV - EDV (ml)    | -1.19 (-2.78; 0.40)                      | 1.4×10 <sup>-1</sup>   | 0.853                       | 10                   | MR Egger                 |             |            |          |          |
|                   |                        | LV - EDM (g)     | -0.58 (-1.63; 0.47)                      | 2.8×10 <sup>-1</sup>   | 0.907                       | 7                    | MR Egger                 |             |            |          |          |
| CATB (P07858)     | CTSB (ENSG00000164733) | RV - SV (ml)     | 3.0/3.0 -0.32 (-0.53; -0.11)             | 3.0×10 <sup>-3</sup>   | 7.81×10 <sup>-6</sup>       | 0.009                | 25                       | IVW         | Interval   |          |          |
|                   |                        | RV - PFR (ml/s)  | -1.12 (-2.65; 0.40)                      | 1.5×10 <sup>-1</sup>   | 0.626                       | 19                   | IVW                      |             |            |          |          |
|                   |                        | RV - PER (ml/s)  | -3.79 (-4.99; -2.59)                     | 6.1×10 <sup>-10</sup>  | 0.003                       | 24                   | IVW                      |             |            |          |          |
|                   |                        | RV - PAFR (ml/s) | -0.83 (-2.23; 0.56)                      | 2.4×10 <sup>-1</sup>   | 0.408                       | 24                   | IVW                      |             |            |          |          |
|                   |                        | RV - ESV (ml)    | -0.74 (-1.68; 0.20)                      | 1.2×10 <sup>-1</sup>   | <0.001                      | 16                   | MR Egger                 |             |            |          |          |
|                   |                        | RV - EF (%)      | 0.12 (-0.30; 0.53)                       | 5.8×10 <sup>-1</sup>   | <0.001                      | 13                   | MR Egger                 |             |            |          |          |
|                   |                        | RV - EDV (ml)    | -1.33 (-2.51; -0.16)                     | 2.6×10 <sup>-2</sup>   | 0.009                       | 23                   | MR Egger                 |             |            |          |          |
|                   |                        | LV - SV (ml)     | -0.87 (-1.10; -0.64)                     | 4.7×10 <sup>-14</sup>  | 0.007                       | 23                   | IVW                      |             |            |          |          |
|                   |                        | LV - PFR (ml/s)  | -1.36 (-2.72; -0.01)                     | 4.9×10 <sup>-2</sup>   | 0.345                       | 25                   | IVW                      |             |            |          |          |
|                   |                        | LV - PER (ml/s)  | -4.93 (-6.24; -3.62)                     | 1.4×10 <sup>-13</sup>  | 0.438                       | 24                   | IVW                      |             |            |          |          |
|                   |                        | LV - PAFR (ml/s) | 4.21 (-0.75; 9.17)                       | 9.7×10 <sup>-2</sup>   | 0.189                       | 23                   | MR Egger                 |             |            |          |          |
|                   |                        | LV - MVR (g/ml)  | -0.00 (-0.00; -0.00)                     | 2.7×10 <sup>-4</sup>   | <0.001                      | 22                   | IVW                      |             |            |          |          |
|                   |                        | LV - ESV (ml)    | 0.12 (-0.10; 0.33)                       | 2.9×10 <sup>-1</sup>   | <0.001                      | 22                   | IVW                      |             |            |          |          |
|                   |                        | LV - EF (%)      | 0.01 (-0.36; 0.37)                       | 9.8×10 <sup>-1</sup>   | <0.001                      | 17                   | MR Egger                 |             |            |          |          |
|                   |                        | LV - EDV (ml)    | -1.45 (-2.68; -0.23)                     | 2.0×10 <sup>-2</sup>   | 0.147                       | 24                   | MR Egger                 |             |            |          |          |
|                   |                        | LV - EDM (g)     | -0.97 (-1.74; -0.21)                     | 1.3×10 <sup>-2</sup>   | 0.056                       | 21                   | MR Egger                 |             |            |          |          |
| C1QC (P02747)     | C1QC (ENSG00000159189) | RV - SV (ml)     | 3.0/3.0 0.27 (-0.12; 0.66)               | 1.8×10 <sup>-1</sup>   | 7.81×10 <sup>-6</sup>       | 0.091                | 44                       | MR Egger    | Interval   |          |          |
|                   |                        | RV - PFR (ml/s)  | -0.61 (-1.36; 0.15)                      | 1.2×10 <sup>-1</sup>   | <0.001                      | 42                   | IVW                      |             |            |          |          |

**Table S15:** Directionally concordant CMR proteins: MR effect estimates of plasma protein effects on sixteen CMR traits. (continued)

| Protein (UniProt) | Gene (ensembl)            | CMR trait        | No. hits/Path. concordance<br>MD (95%CI) | P-value                | Multiple testing threshold | Q p-value | No. variants<br>MR model | PQTL source |          |
|-------------------|---------------------------|------------------|------------------------------------------|------------------------|----------------------------|-----------|--------------------------|-------------|----------|
|                   |                           | RV - PER (ml/s)  | 1.70 (-0.30; 3.69)                       | 9.5×10 <sup>-2</sup>   | 0.003                      | 40        | MR Egger                 |             |          |
|                   |                           | RV - PAFR (ml/s) | 1.37 (-0.94; 3.69)                       | 2.4×10 <sup>-1</sup>   | 0.254                      | 44        | MR Egger                 |             |          |
|                   |                           | RV - ESV (ml)    | 0.44 (0.26; 0.61)                        | 7.7×10 <sup>-7</sup>   | 0.095                      | 42        | IWV                      |             |          |
|                   |                           | RV - EF (%)      | -0.13 (-0.18; -0.07)                     | 1.3×10 <sup>-5</sup>   | 0.657                      | 42        | IWV                      |             |          |
|                   |                           | RV - EDV (ml)    | 0.67 (0.42; 0.92)                        | 9.5×10 <sup>-8</sup>   | 0.018                      | 42        | IWV                      |             |          |
|                   |                           | LV - SV (ml)     | 0.61 (0.23; 0.99)                        | 1.7×10 <sup>-3</sup>   | 0.218                      | 44        | MR Egger                 |             |          |
|                   |                           | LV - PFR (ml/s)  | -0.41 (-1.26; 0.44)                      | 3.4×10 <sup>-1</sup>   | 0.961                      | 44        | IWV                      |             |          |
|                   |                           | LV - PER (ml/s)  | -1.04 (-1.90; -0.18)                     | 1.8×10 <sup>-2</sup>   | 0.039                      | 41        | IWV                      |             |          |
|                   |                           | LV - PAFR (ml/s) | 0.89 (-1.58; 3.36)                       | 4.8×10 <sup>-1</sup>   | 0.272                      | 44        | MR Egger                 |             |          |
|                   |                           | LV - MVR (g/ml)  | -0.00 (-0.00; 0.00)                      | 4.2×10 <sup>-1</sup>   | 0.003                      | 42        | MR Egger                 |             |          |
|                   |                           | LV - ESV (ml)    | 0.39 (0.25; 0.53)                        | 7.7×10 <sup>-8</sup>   | <0.001                     | 39        | IWV                      |             |          |
|                   |                           | LV - EF (%)      | -0.15 (-0.29; -0.00)                     | 4.4×10 <sup>-2</sup>   | 0.007                      | 41        | MR Egger                 |             |          |
|                   |                           | LV - EDV (ml)    | 0.49 (0.27; 0.72)                        | 2.0×10 <sup>-5</sup>   | 0.015                      | 43        | IWV                      |             |          |
|                   |                           | LV - EDM (g)     | 0.28 (-0.04; 0.60)                       | 9.1×10 <sup>-2</sup>   | 0.013                      | 43        | MR Egger                 |             |          |
| BSSP4 (Q9GZM4)    | PRSS22 (ENSG00000005001)  | RV - SV (ml)     | 3.0/3.0 1.11 (0.43; 1.79)                | 1.3×10 <sup>-3</sup>   | 7.81×10 <sup>-6</sup>      | 0.444     | 19                       | MR Egger    | Interval |
|                   |                           | RV - PFR (ml/s)  | 4.53 (0.91; 8.15)                        | 1.4×10 <sup>-2</sup>   | 0.810                      | 19        | MR Egger                 |             |          |
|                   |                           | RV - PER (ml/s)  | 1.97 (0.57; 3.37)                        | 5.9×10 <sup>-3</sup>   | 0.074                      | 16        | IWV                      |             |          |
|                   |                           | RV - PAFR (ml/s) | 3.31 (-0.97; 7.59)                       | 1.3×10 <sup>-1</sup>   | 0.927                      | 19        | MR Egger                 |             |          |
|                   |                           | RV - ESV (ml)    | -0.01 (-0.20; 0.19)                      | 9.5×10 <sup>-1</sup>   | 0.039                      | 18        | IWV                      |             |          |
|                   |                           | RV - EF (%)      | 0.34 (0.26; 0.42)                        | 1.0×10 <sup>-100</sup> | 0.303                      | 18        | IWV                      |             |          |
|                   |                           | RV - EDV (ml)    | 1.65 (0.53; 2.77)                        | 3.9×10 <sup>-3</sup>   | 0.048                      | 19        | MR Egger                 |             |          |
|                   |                           | LV - SV (ml)     | 1.29 (0.60; 1.98)                        | 2.6×10 <sup>-4</sup>   | 0.501                      | 19        | MR Egger                 |             |          |
|                   |                           | LV - PFR (ml/s)  | 4.99 (3.70; 6.28)                        | 3.5×10 <sup>-14</sup>  | 0.209                      | 18        | IWV                      |             |          |
|                   |                           | LV - PER (ml/s)  | 3.07 (-0.99; 7.13)                       | 1.4×10 <sup>-1</sup>   | 0.686                      | 19        | MR Egger                 |             |          |
|                   |                           | LV - PAFR (ml/s) | 2.47 (-2.04; 6.98)                       | 2.8×10 <sup>-1</sup>   | 0.535                      | 19        | MR Egger                 |             |          |
|                   |                           | LV - MVR (g/ml)  | -0.00 (-0.00; 0.00)                      | 7.9×10 <sup>-1</sup>   | 0.505                      | 18        | IWV                      |             |          |
|                   |                           | LV - ESV (ml)    | -0.04 (-0.22; 0.14)                      | 6.5×10 <sup>-1</sup>   | 0.510                      | 18        | IWV                      |             |          |
|                   |                           | LV - EF (%)      | 0.22 (0.15; 0.30)                        | 8.0×10 <sup>-9</sup>   | 0.487                      | 17        | IWV                      |             |          |
|                   |                           | LV - EDV (ml)    | 1.45 (0.35; 2.55)                        | 9.8×10 <sup>-3</sup>   | 0.449                      | 19        | MR Egger                 |             |          |
|                   |                           | LV - EDM (g)     | 0.66 (0.05; 1.27)                        | 3.4×10 <sup>-2</sup>   | 0.426                      | 19        | MR Egger                 |             |          |
| ASM3A (Q92484)    | SMPDL3A (ENSG00000172594) | RV - SV (ml)     | 3.0/3.0 0.47 (0.31; 0.62)                | 4.1×10 <sup>-9</sup>   | 7.81×10 <sup>-6</sup>      | 0.051     | 36                       | IWV         | Interval |
|                   |                           | RV - PFR (ml/s)  | 0.68 (-0.02; 1.38)                       | 5.8×10 <sup>-2</sup>   | <0.001                     | 35        | IWV                      |             |          |
|                   |                           | RV - PER (ml/s)  | 2.30 (1.60; 3.01)                        | 1.5×10 <sup>-10</sup>  | <0.001                     | 37        | IWV                      |             |          |
|                   |                           | RV - PAFR (ml/s) | 1.26 (-0.83; 3.35)                       | 2.4×10 <sup>-1</sup>   | 0.717                      | 38        | MR Egger                 |             |          |
|                   |                           | RV - ESV (ml)    | 0.24 (0.08; 0.39)                        | 2.6×10 <sup>-3</sup>   | 0.151                      | 36        | IWV                      |             |          |
|                   |                           | RV - EF (%)      | 0.28 (0.16; 0.41)                        | 1.0×10 <sup>-5</sup>   | <0.001                     | 38        | MR Egger                 |             |          |
|                   |                           | RV - EDV (ml)    | 0.60 (-0.01; 1.22)                       | 5.4×10 <sup>-2</sup>   | 0.086                      | 40        | MR Egger                 |             |          |
|                   |                           | LV - SV (ml)     | 0.38 (0.03; 0.74)                        | 3.5×10 <sup>-2</sup>   | 0.417                      | 34        | MR Egger                 |             |          |
|                   |                           | LV - PFR (ml/s)  | 2.00 (-0.24; 4.23)                       | 8.0×10 <sup>-2</sup>   | 0.031                      | 36        | MR Egger                 |             |          |
|                   |                           | LV - PER (ml/s)  | 4.78 (2.81; 6.76)                        | 1.9×10 <sup>-6</sup>   | <0.001                     | 38        | MR Egger                 |             |          |
|                   |                           | LV - PAFR (ml/s) | -1.16 (-2.07; -0.24)                     | 1.3×10 <sup>-2</sup>   | 0.058                      | 40        | IWV                      |             |          |
|                   |                           | LV - MVR (g/ml)  | -0.00 (-0.00; -0.00)                     | 1.8×10 <sup>-3</sup>   | 0.007                      | 39        | MR Egger                 |             |          |
|                   |                           | LV - ESV (ml)    | -0.35 (-0.71; 0.01)                      | 5.8×10 <sup>-2</sup>   | 0.120                      | 37        | MR Egger                 |             |          |
|                   |                           | LV - EF (%)      | 0.16 (-0.00; 0.33)                       | 5.1×10 <sup>-2</sup>   | 0.269                      | 34        | MR Egger                 |             |          |
|                   |                           | LV - EDV (ml)    | 0.26 (0.05; 0.47)                        | 1.5×10 <sup>-2</sup>   | 0.356                      | 38        | IWV                      |             |          |
|                   |                           | LV - EDM (g)     | -0.51 (-0.80; -0.22)                     | 5.5×10 <sup>-4</sup>   | 0.010                      | 39        | MR Egger                 |             |          |

General:

CMR: Cardiac MRI, MR: Mendelian randomization, MD: mean difference, CI: confidence interval. Effect estimates are coded towards protein and CMR increasing directions.

**Table S16:** Phenome-wide drug target MR scan of proteins with a prioritized CMR association.

| Protein (uniprot)               | Protein set          | Trait                           | Estimate (95%CI)     | P-value                | Q p-value            | No. Variants          | MR model | PQTL source |    |          |          |
|---------------------------------|----------------------|---------------------------------|----------------------|------------------------|----------------------|-----------------------|----------|-------------|----|----------|----------|
| AT1B2 (P14415)                  | Drugged              | HF (OR)                         | 0.99 (0.97; 1.01)    | 1.7×10 <sup>-1</sup>   | <0.001               | 14                    | IWV      | Interval    |    |          |          |
|                                 |                      | Non-ischemic CM (OR)            | 0.98 (0.76; 1.26)    | 8.5×10 <sup>-1</sup>   | 0.105                | 13                    | MR Egger |             |    |          |          |
|                                 |                      | DCM (OR)                        | 1.22 (1.10; 1.35)    | 9.5×10 <sup>-5</sup>   | 0.525                | 16                    | IWV      |             |    |          |          |
|                                 |                      | AF (OR)                         | 1.00 (0.88; 1.13)    | 9.9×10 <sup>-1</sup>   | 0.091                | 12                    | MR Egger |             |    |          |          |
|                                 |                      | CHD (OR)                        | 1.09 (1.01; 1.19)    | 3.7×10 <sup>-2</sup>   | 0.253                | 13                    | MR Egger |             |    |          |          |
|                                 |                      | clMT (mm)                       | 0.00 (-0.00; 0.01)   | 6.5×10 <sup>-1</sup>   | 0.002                | 11                    | MR Egger |             |    |          |          |
|                                 |                      | Carotid plaque (OR)             | 0.94 (0.85; 1.04)    | 2.4×10 <sup>-1</sup>   | <0.001               | 13                    | MR Egger |             |    |          |          |
|                                 |                      | Any stroke (OR)                 | 1.04 (1.02; 1.06)    | 2.2×10 <sup>-5</sup>   | 0.049                | 15                    | IWV      |             |    |          |          |
|                                 |                      | Any ischemic stroke (OR)        | 1.05 (1.02; 1.08)    | 2.7×10 <sup>-4</sup>   | 0.083                | 15                    | IWV      |             |    |          |          |
|                                 |                      | LDL cholesterol (mmol/l)        | 0.04 (0.04; 0.05)    | 1.0×10 <sup>-100</sup> | <0.001               | 13                    | IWV      |             |    |          |          |
|                                 |                      | Apolipoprotein B (g/l)          | 0.01 (0.01; 0.01)    | 1.0×10 <sup>-100</sup> | <0.001               | 14                    | IWV      |             |    |          |          |
|                                 |                      | Triglycerides (mmol/l)          | 0.02 (0.00; 0.04)    | 2.2×10 <sup>-2</sup>   | <0.001               | 15                    | MR Egger |             |    |          |          |
|                                 |                      | Cholesterol (mmol/l)            | 0.04 (0.03; 0.05)    | 1.0×10 <sup>-100</sup> | <0.001               | 11                    | IWV      |             |    |          |          |
|                                 |                      | HDL cholesterol (mmol/l)        | -0.02 (-0.02; -0.01) | 1.0×10 <sup>-100</sup> | <0.001               | 9                     | IWV      |             |    |          |          |
|                                 |                      | Apolipoprotein A1 (g/l)         | -0.01 (-0.02; -0.00) | 6.8×10 <sup>-3</sup>   | <0.001               | 9                     | MR Egger |             |    |          |          |
|                                 |                      | Glucose (mmol/l)                | -0.03 (-0.05; -0.01) | 2.0×10 <sup>-3</sup>   | <0.001               | 17                    | MR Egger |             |    |          |          |
|                                 |                      | Glycated haemoglobin (mmol/mol) | 0.42 (0.33; 0.51)    | 1.0×10 <sup>-100</sup> | 0.117                | 11                    | IWV      |             |    |          |          |
|                                 |                      | T2DM (OR)                       | 0.96 (0.92; 1.00)    | 6.8×10 <sup>-2</sup>   | 0.454                | 11                    | MR Egger |             |    |          |          |
|                                 |                      | BMI (SD)                        | -0.02 (-0.03; -0.01) | 3.7×10 <sup>-3</sup>   | <0.001               | 7                     | IWV      |             |    |          |          |
|                                 |                      | SBP (mmHg)                      | 0.16 (-0.11; 0.43)   | 2.4×10 <sup>-1</sup>   | 0.116                | 8                     | MR Egger |             |    |          |          |
|                                 |                      | DBP (mmHg)                      | 0.25 (-0.03; 0.53)   | 8.1×10 <sup>-2</sup>   | 0.954                | 5                     | MR Egger |             |    |          |          |
|                                 |                      | ECG heart rate (exercise) (BPM) | 0.17 (-0.54; 0.88)   | 6.4×10 <sup>-1</sup>   | 0.153                | 18                    | MR Egger |             |    |          |          |
|                                 |                      | ECG load (exercise) (Watts)     | -0.22 (-0.94; 0.49)  | 5.4×10 <sup>-1</sup>   | 0.369                | 18                    | MR Egger |             |    |          |          |
|                                 |                      | Asthma (OR)                     | 1.01 (1.00; 1.03)    | 1.5×10 <sup>-1</sup>   | 0.015                | 16                    | IWV      |             |    |          |          |
|                                 |                      | CRP (log(mg/L))                 | -0.02 (-0.04; -0.00) | 1.4×10 <sup>-2</sup>   | 0.130                | 12                    | IWV      |             |    |          |          |
|                                 |                      | eGFR (SD of log(eGFR))          | -0.01 (-0.01; -0.01) | 5.7×10 <sup>-11</sup>  | <0.001               | 13                    | MR Egger |             |    |          |          |
|                                 |                      | BUN (mg/dl)                     | 0.01 (0.00; 0.01)    | 3.5×10 <sup>-4</sup>   | 0.093                | 10                    | IWV      |             |    |          |          |
|                                 |                      | CKD (OR)                        | 1.05 (0.99; 1.11)    | 9.5×10 <sup>-2</sup>   | <0.001               | 15                    | MR Egger |             |    |          |          |
|                                 |                      | Alzheimer's (OR)                | 0.99 (0.97; 1.01)    | 3.0×10 <sup>-1</sup>   | 0.260                | 16                    | MR Egger |             |    |          |          |
|                                 |                      | Parkinson's (OR)                | 1.06 (0.94; 1.20)    | 3.1×10 <sup>-1</sup>   | 0.006                | 13                    | MR Egger |             |    |          |          |
|                                 |                      | Lewy body dementia (OR)         | 1.29 (0.93; 1.80)    | 1.3×10 <sup>-1</sup>   | 0.203                | 15                    | MR Egger |             |    |          |          |
|                                 |                      | Breast cancer (OR)              | 1.05 (1.03; 1.08)    | 3.8×10 <sup>-5</sup>   | 0.007                | 16                    | IWV      |             |    |          |          |
|                                 |                      | Lung cancer (OR)                | 0.95 (0.90; 1.00)    | 5.8×10 <sup>-2</sup>   | 0.676                | 17                    | IWV      |             |    |          |          |
|                                 |                      | Colon cancer (OR)               | 1.49 (1.19; 1.86)    | 4.6×10 <sup>-4</sup>   | 0.694                | 17                    | MR Egger |             |    |          |          |
|                                 |                      | Prostate cancer (OR)            | 1.05 (1.02; 1.09)    | 1.7×10 <sup>-3</sup>   | 0.043                | 13                    | IWV      |             |    |          |          |
|                                 |                      | CAH6 (P23280)                   | Drugged              | HF (OR)                | 1.01 (0.99; 1.03)    | 2.8×10 <sup>-1</sup>  | 0.027    |             | 39 | MR Egger | Interval |
|                                 |                      |                                 |                      | Non-ischemic CM (OR)   | 1.00 (0.96; 1.04)    | 9.5×10 <sup>-1</sup>  | <0.001   |             | 39 | IWV      |          |
|                                 |                      |                                 |                      | DCM (OR)               | 1.18 (1.13; 1.23)    | 6.2×10 <sup>-15</sup> | 0.101    |             | 43 | IWV      |          |
|                                 |                      |                                 |                      | AF (OR)                | 0.97 (0.95; 0.99)    | 1.2×10 <sup>-3</sup>  | 0.014    |             | 46 | MR Egger |          |
|                                 |                      |                                 |                      | CHD (OR)               | 1.00 (0.97; 1.03)    | 9.0×10 <sup>-1</sup>  | 0.048    |             | 42 | MR Egger |          |
|                                 |                      |                                 |                      | clMT (mm)              | -0.00 (-0.00; -0.00) | 5.5×10 <sup>-7</sup>  | <0.001   |             | 40 | IWV      |          |
|                                 |                      |                                 |                      | Carotid plaque (OR)    | 1.00 (0.96; 1.05)    | 9.0×10 <sup>-1</sup>  | 0.256    |             | 40 | MR Egger |          |
|                                 |                      |                                 |                      | Any stroke (OR)        | 1.02 (0.99; 1.04)    | 1.5×10 <sup>-1</sup>  | 0.012    |             | 42 | MR Egger |          |
| Any ischemic stroke (OR)        | 1.05 (1.02; 1.09)    |                                 |                      | 1.1×10 <sup>-3</sup>   | 0.564                | 39                    | MR Egger |             |    |          |          |
| LDL cholesterol (mmol/l)        | -0.00 (-0.01; 0.00)  |                                 |                      | 2.1×10 <sup>-1</sup>   | 0.524                | 50                    | MR Egger |             |    |          |          |
| Apolipoprotein B (g/l)          | -0.00 (-0.00; 0.00)  |                                 |                      | 8.8×10 <sup>-1</sup>   | 0.099                | 47                    | IWV      |             |    |          |          |
| Triglycerides (mmol/l)          | 0.00 (-0.00; 0.00)   |                                 |                      | 9.2×10 <sup>-1</sup>   | 0.004                | 43                    | IWV      |             |    |          |          |
| Cholesterol (mmol/l)            | -0.01 (-0.02; -0.00) |                                 |                      | 1.0×10 <sup>-2</sup>   | 0.145                | 50                    | MR Egger |             |    |          |          |
| HDL cholesterol (mmol/l)        | -0.00 (-0.01; -0.00) |                                 |                      | 8.6×10 <sup>-4</sup>   | 0.081                | 49                    | MR Egger |             |    |          |          |
| Apolipoprotein A1 (g/l)         | -0.00 (-0.00; 0.00)  |                                 |                      | 5.3×10 <sup>-2</sup>   | 0.121                | 48                    | MR Egger |             |    |          |          |
| Glucose (mmol/l)                | -0.00 (-0.01; 0.01)  |                                 |                      | 6.8×10 <sup>-1</sup>   | 0.019                | 50                    | MR Egger |             |    |          |          |
| Glycated haemoglobin (mmol/mol) | -0.03 (-0.08; 0.01)  |                                 |                      | 1.4×10 <sup>-1</sup>   | 0.571                | 43                    | MR Egger |             |    |          |          |
| T2DM (OR)                       | 1.01 (1.00; 1.02)    |                                 |                      | 4.3×10 <sup>-2</sup>   | <0.001               | 39                    | IWV      |             |    |          |          |
| BMI (SD)                        | 0.00 (0.00; 0.01)    |                                 |                      | 3.1×10 <sup>-2</sup>   | 0.021                | 33                    | IWV      |             |    |          |          |
| SBP (mmHg)                      | 0.12 (0.08; 0.16)    |                                 |                      | 1.8×10 <sup>-8</sup>   | 0.003                | 32                    | IWV      |             |    |          |          |
| DBP (mmHg)                      | 0.05 (0.03; 0.08)    |                                 |                      | 6.6×10 <sup>-6</sup>   | 0.098                | 38                    | IWV      |             |    |          |          |
| ECG heart rate (exercise) (BPM) | -0.06 (-0.15; 0.03)  |                                 |                      | 2.1×10 <sup>-1</sup>   | 0.042                | 46                    | IWV      |             |    |          |          |
| ECG load (exercise) (Watts)     | -0.11 (-0.36; 0.13)  |                                 |                      | 3.6×10 <sup>-1</sup>   | 0.312                | 50                    | MR Egger |             |    |          |          |
| Asthma (OR)                     | 1.04 (1.03; 1.04)    |                                 |                      | 1.0×10 <sup>-100</sup> | <0.001               | 34                    | IWV      |             |    |          |          |
| CRP (log(mg/L))                 | 0.01 (0.01; 0.02)    |                                 |                      | 3.7×10 <sup>-9</sup>   | 0.182                | 38                    | IWV      |             |    |          |          |
| eGFR (SD of log(eGFR))          | 0.00 (-0.00; 0.00)   |                                 |                      | 8.5×10 <sup>-1</sup>   | <0.001               | 39                    | IWV      |             |    |          |          |
| BUN (mg/dl)                     | 0.00 (-0.00; 0.00)   |                                 |                      | 4.1×10 <sup>-1</sup>   | 0.121                | 40                    | MR Egger |             |    |          |          |
| CKD (OR)                        | 1.02 (1.00; 1.05)    |                                 |                      | 8.4×10 <sup>-2</sup>   | <0.001               | 41                    | MR Egger |             |    |          |          |
| Alzheimer's (OR)                | 1.00 (1.00; 1.00)    |                                 |                      | 3.7×10 <sup>-2</sup>   | <0.001               | 40                    | IWV      |             |    |          |          |
| Parkinson's (OR)                | 0.95 (0.89; 1.02)    |                                 |                      | 1.4×10 <sup>-1</sup>   | 0.621                | 38                    | MR Egger |             |    |          |          |
| Lewy body dementia (OR)         | 0.98 (0.94; 1.03)    |                                 |                      | 4.4×10 <sup>-1</sup>   | 0.307                | 39                    | IWV      |             |    |          |          |

**Table S16:** Phenome-wide drug target MR scan of proteins with a prioritized CMR association. (*continued*)

| Protein (uniprot)               | Protein set          | Trait                           | Estimate (95%CI)     | P-value                | Q p-value         | No. Variants          | MR model | PQTL source |          |          |
|---------------------------------|----------------------|---------------------------------|----------------------|------------------------|-------------------|-----------------------|----------|-------------|----------|----------|
| CD33 (P20138)                   | Drugged              | Breast cancer (OR)              | 1.00 (0.95; 1.04)    | 9.6×10 <sup>-1</sup>   | <0.001            | 37                    | MR Egger |             |          |          |
|                                 |                      | Lung cancer (OR)                | 0.99 (0.95; 1.02)    | 4.3×10 <sup>-1</sup>   | 0.013             | 41                    | IVW      |             |          |          |
|                                 |                      | Colon cancer (OR)               | 1.03 (1.00; 1.07)    | 4.7×10 <sup>-2</sup>   | 0.181             | 41                    | IVW      |             |          |          |
|                                 |                      | Prostate cancer (OR)            | 0.97 (0.95; 0.99)    | 6.3×10 <sup>-4</sup>   | 0.014             | 38                    | IVW      |             |          |          |
|                                 |                      | HF (OR)                         | 0.96 (0.95; 0.98)    | 9.6×10 <sup>-6</sup>   | 0.038             | 40                    | MR Egger | Interval    |          |          |
|                                 |                      | Non-ischemic CM (OR)            | 0.96 (0.89; 1.03)    | 2.1×10 <sup>-1</sup>   | 0.079             | 45                    | MR Egger |             |          |          |
|                                 |                      | DCM (OR)                        | 0.95 (0.85; 1.06)    | 3.5×10 <sup>-1</sup>   | 0.594             | 36                    | MR Egger |             |          |          |
|                                 |                      | AF (OR)                         | 0.95 (0.94; 0.96)    | 5.3×10 <sup>-15</sup>  | <0.001            | 46                    | MR Egger |             |          |          |
|                                 |                      | CHD (OR)                        | 1.01 (1.00; 1.02)    | 1.7×10 <sup>-2</sup>   | 0.736             | 41                    | IVW      |             |          |          |
|                                 |                      | clMT (mm)                       | 0.00 (-0.00; 0.00)   | 7.2×10 <sup>-1</sup>   | 0.060             | 40                    | MR Egger |             |          |          |
|                                 |                      | Carotid plaque (OR)             | 0.90 (0.85; 0.94)    | 3.1×10 <sup>-5</sup>   | 0.665             | 37                    | MR Egger |             |          |          |
|                                 |                      | Any stroke (OR)                 | 1.00 (0.98; 1.02)    | 6.7×10 <sup>-1</sup>   | 0.026             | 43                    | MR Egger |             |          |          |
|                                 |                      | Any ischemic stroke (OR)        | 0.99 (0.97; 1.02)    | 5.8×10 <sup>-1</sup>   | 0.031             | 42                    | MR Egger |             |          |          |
|                                 |                      | LDL cholesterol (mmol/l)        | 0.00 (-0.00; 0.01)   | 9.6×10 <sup>-2</sup>   | 0.257             | 51                    | MR Egger |             |          |          |
|                                 |                      | Apolipoprotein B (g/l)          | 0.00 (0.00; 0.00)    | 7.1×10 <sup>-3</sup>   | 0.156             | 52                    | MR Egger |             |          |          |
|                                 |                      | Triglycerides (mmol/l)          | 0.00 (0.00; 0.01)    | 7.0×10 <sup>-5</sup>   | 0.161             | 52                    | IVW      |             |          |          |
|                                 |                      | Cholesterol (mmol/l)            | 0.00 (-0.00; 0.01)   | 6.4×10 <sup>-1</sup>   | 0.084             | 52                    | MR Egger |             |          |          |
|                                 |                      | HDL cholesterol (mmol/l)        | -0.00 (-0.00; -0.00) | 1.6×10 <sup>-2</sup>   | 0.053             | 52                    | MR Egger |             |          |          |
|                                 |                      | Apolipoprotein A1 (g/l)         | -0.00 (-0.00; 0.00)  | 8.2×10 <sup>-2</sup>   | <0.001            | 53                    | MR Egger |             |          |          |
|                                 |                      | Glucose (mmol/l)                | -0.00 (-0.01; -0.00) | 1.0×10 <sup>-3</sup>   | 0.003             | 51                    | IVW      |             |          |          |
|                                 |                      | Glycated haemoglobin (mmol/mol) | 0.13 (0.11; 0.16)    | 1.0×10 <sup>-100</sup> | 0.003             | 52                    | MR Egger |             |          |          |
|                                 |                      | T2DM (OR)                       | 1.00 (0.98; 1.01)    | 8.1×10 <sup>-1</sup>   | 0.029             | 43                    | MR Egger |             |          |          |
|                                 |                      | BMI (SD)                        | 0.01 (0.00; 0.01)    | 2.3×10 <sup>-2</sup>   | <0.001            | 38                    | MR Egger |             |          |          |
|                                 |                      | SBP (mmHg)                      | 0.11 (0.03; 0.19)    | 6.4×10 <sup>-3</sup>   | 0.019             | 31                    | MR Egger |             |          |          |
|                                 |                      | DBP (mmHg)                      | 0.04 (0.02; 0.06)    | 3.8×10 <sup>-5</sup>   | 0.022             | 31                    | IVW      |             |          |          |
|                                 |                      | ECG heart rate (exercise) (BPM) | -0.16 (-0.35; 0.04)  | 1.2×10 <sup>-1</sup>   | 0.159             | 50                    | MR Egger |             |          |          |
|                                 |                      | ECG load (exercise) (Watts)     | 0.00 (-0.20; 0.20)   | 9.7×10 <sup>-1</sup>   | 0.002             | 50                    | MR Egger |             |          |          |
|                                 |                      | Asthma (OR)                     | 1.01 (1.00; 1.02)    | 2.9×10 <sup>-1</sup>   | 0.013             | 52                    | MR Egger |             |          |          |
|                                 |                      | CRP (log(mg/L))                 | 0.03 (0.02; 0.04)    | 4.3×10 <sup>-6</sup>   | <0.001            | 32                    | MR Egger |             |          |          |
|                                 |                      | eGFR (SD of log(eGFR))          | -0.00 (-0.00; 0.00)  | 1.1×10 <sup>-1</sup>   | 0.034             | 40                    | MR Egger |             |          |          |
|                                 |                      | BUN (mg/dl)                     | -0.00 (-0.01; -0.00) | 7.3×10 <sup>-3</sup>   | 0.751             | 40                    | MR Egger |             |          |          |
|                                 |                      | CKD (OR)                        | 0.99 (0.97; 1.01)    | 3.2×10 <sup>-1</sup>   | 0.459             | 44                    | MR Egger |             |          |          |
|                                 |                      | Alzheimer's (OR)                | 1.02 (1.02; 1.03)    | 1.0×10 <sup>-100</sup> | 0.004             | 44                    | MR Egger |             |          |          |
|                                 |                      | Parkinson's (OR)                | 1.05 (1.01; 1.08)    | 1.9×10 <sup>-2</sup>   | 0.020             | 43                    | MR Egger |             |          |          |
|                                 |                      | Lewy body dementia (OR)         | 0.96 (0.89; 1.03)    | 2.2×10 <sup>-1</sup>   | <0.001            | 43                    | MR Egger |             |          |          |
|                                 |                      | Breast cancer (OR)              | 1.01 (1.00; 1.02)    | 1.5×10 <sup>-1</sup>   | 0.024             | 49                    | IVW      |             |          |          |
|                                 |                      | Lung cancer (OR)                | 1.00 (0.94; 1.07)    | 9.6×10 <sup>-1</sup>   | 0.235             | 46                    | MR Egger |             |          |          |
|                                 |                      | Colon cancer (OR)               | 1.03 (0.98; 1.07)    | 2.8×10 <sup>-1</sup>   | 0.012             | 46                    | MR Egger |             |          |          |
|                                 |                      | Prostate cancer (OR)            | 0.93 (0.91; 0.96)    | 4.9×10 <sup>-6</sup>   | 0.065             | 49                    | MR Egger |             |          |          |
|                                 |                      | CO6A1 (P12109)                  | Drugged              | HF (OR)                | 1.07 (0.95; 1.19) | 2.7×10 <sup>-1</sup>  | 0.550    | 15          | MR Egger | Interval |
|                                 |                      |                                 |                      | Non-ischemic CM (OR)   | 1.53 (1.35; 1.74) | 2.9×10 <sup>-11</sup> | 0.744    | 11          | IVW      |          |
|                                 |                      |                                 |                      | DCM (OR)               | 1.02 (0.57; 1.82) | 9.6×10 <sup>-1</sup>  | 0.247    | 18          | MR Egger |          |
|                                 |                      |                                 |                      | AF (OR)                | 1.02 (0.98; 1.06) | 4.4×10 <sup>-1</sup>  | 0.131    | 12          | IVW      |          |
| CHD (OR)                        | 0.98 (0.96; 1.01)    |                                 |                      | 1.7×10 <sup>-1</sup>   | 0.413             | 15                    | IVW      |             |          |          |
| clMT (mm)                       | -0.01 (-0.02; 0.00)  |                                 |                      | 1.7×10 <sup>-1</sup>   | 0.368             | 15                    | MR Egger |             |          |          |
| Carotid plaque (OR)             | 0.89 (0.83; 0.95)    |                                 |                      | 5.2×10 <sup>-4</sup>   | 0.111             | 13                    | IVW      |             |          |          |
| Any stroke (OR)                 | 1.03 (0.99; 1.07)    |                                 |                      | 1.4×10 <sup>-1</sup>   | 0.434             | 14                    | IVW      |             |          |          |
| Any ischemic stroke (OR)        | 1.01 (0.97; 1.05)    |                                 |                      | 6.3×10 <sup>-1</sup>   | 0.590             | 14                    | IVW      |             |          |          |
| LDL cholesterol (mmol/l)        | -0.01 (-0.03; 0.02)  |                                 |                      | 6.9×10 <sup>-1</sup>   | 0.674             | 16                    | MR Egger |             |          |          |
| Apolipoprotein B (g/l)          | 0.00 (-0.00; 0.01)   |                                 |                      | 2.2×10 <sup>-1</sup>   | 0.142             | 17                    | MR Egger |             |          |          |
| Triglycerides (mmol/l)          | 0.02 (0.01; 0.02)    |                                 |                      | 1.0×10 <sup>-9</sup>   | 0.484             | 17                    | IVW      |             |          |          |
| Cholesterol (mmol/l)            | 0.03 (0.02; 0.03)    |                                 |                      | 4.6×10 <sup>-13</sup>  | 0.187             | 16                    | IVW      |             |          |          |
| HDL cholesterol (mmol/l)        | -0.00 (-0.01; 0.01)  |                                 |                      | 6.3×10 <sup>-1</sup>   | 0.265             | 16                    | MR Egger |             |          |          |
| Apolipoprotein A1 (g/l)         | -0.00 (-0.00; 0.00)  |                                 |                      | 9.5×10 <sup>-1</sup>   | 0.174             | 17                    | IVW      |             |          |          |
| Glucose (mmol/l)                | -0.01 (-0.04; 0.03)  |                                 |                      | 6.7×10 <sup>-1</sup>   | 0.002             | 17                    | MR Egger |             |          |          |
| Glycated haemoglobin (mmol/mol) | -0.01 (-0.19; 0.16)  |                                 |                      | 8.8×10 <sup>-1</sup>   | 0.909             | 17                    | MR Egger |             |          |          |
| T2DM (OR)                       | 0.94 (0.86; 1.02)    |                                 |                      | 1.5×10 <sup>-1</sup>   | 0.040             | 13                    | MR Egger |             |          |          |
| BMI (SD)                        | -0.00 (-0.01; 0.01)  |                                 |                      | 8.1×10 <sup>-1</sup>   | 0.700             | 13                    | IVW      |             |          |          |
| SBP (mmHg)                      | -0.30 (-0.46; -0.14) |                                 |                      | 2.2×10 <sup>-4</sup>   | 0.350             | 8                     | IVW      |             |          |          |
| DBP (mmHg)                      | -0.33 (-0.41; -0.25) |                                 |                      | 2.2×10 <sup>-16</sup>  | 0.014             | 10                    | IVW      |             |          |          |
| ECG heart rate (exercise) (BPM) | -0.33 (-1.31; 0.66)  |                                 |                      | 5.1×10 <sup>-1</sup>   | 0.558             | 17                    | MR Egger |             |          |          |
| ECG load (exercise) (Watts)     | 0.31 (-0.79; 1.42)   |                                 |                      | 5.8×10 <sup>-1</sup>   | 0.596             | 17                    | MR Egger |             |          |          |
| Asthma (OR)                     | 1.00 (0.93; 1.08)    |                                 |                      | 9.0×10 <sup>-1</sup>   | 0.261             | 17                    | MR Egger |             |          |          |
| CRP (log(mg/L))                 | -0.01 (-0.03; -0.00) |                                 |                      | 3.8×10 <sup>-2</sup>   | 0.633             | 14                    | IVW      |             |          |          |
| eGFR (SD of log(eGFR))          | -0.00 (-0.00; 0.00)  |                                 |                      | 6.3×10 <sup>-1</sup>   | 0.004             | 11                    | IVW      |             |          |          |
| BUN (mg/dl)                     | 0.00 (-0.00; 0.01)   |                                 |                      | 5.3×10 <sup>-2</sup>   | <0.001            | 12                    | IVW      |             |          |          |

**Table S16:** Phenome-wide drug target MR scan of proteins with a prioritized CMR association. (*continued*)

| Protein (uniprot) | Protein set | Trait                           | Estimate (95%CI)     | P-value               | Q p-value | No. Variants | MR model | PQTL source |
|-------------------|-------------|---------------------------------|----------------------|-----------------------|-----------|--------------|----------|-------------|
|                   |             | CKD (OR)                        | 1.05 (1.01; 1.09)    | 2.7×10 <sup>-2</sup>  | 0.433     | 11           | IWV      |             |
|                   |             | Alzheimer's (OR)                | 1.00 (0.99; 1.01)    | 4.7×10 <sup>-1</sup>  | 0.014     | 15           | IWV      |             |
|                   |             | Parkinson's (OR)                | 1.01 (0.93; 1.10)    | 8.2×10 <sup>-1</sup>  | 0.302     | 11           | IWV      |             |
|                   |             | Lewy body dementia (OR)         | 1.35 (1.12; 1.62)    | 1.4×10 <sup>-3</sup>  | 0.125     | 11           | IWV      |             |
|                   |             | Breast cancer (OR)              | 0.94 (0.90; 0.98)    | 8.0×10 <sup>-3</sup>  | 0.829     | 11           | IWV      |             |
|                   |             | Lung cancer (OR)                | 1.30 (1.15; 1.46)    | 3.1×10 <sup>-5</sup>  | 0.198     | 12           | IWV      |             |
|                   |             | Colon cancer (OR)               | 1.00 (0.63; 1.58)    | 1.0×10 <sup>0</sup>   | 0.745     | 10           | MR Egger |             |
|                   |             | Prostate cancer (OR)            | 0.94 (0.89; 0.99)    | 3.0×10 <sup>-2</sup>  | 0.007     | 12           | IWV      |             |
| COFAL (P39059)    | Drugged     | HF (OR)                         | 0.91 (0.82; 1.02)    | 1.1×10 <sup>-1</sup>  | 0.916     | 15           | MR Egger | Interval    |
|                   |             | Non-ischemic CM (OR)            | 1.03 (0.94; 1.11)    | 5.6×10 <sup>-1</sup>  | 0.964     | 16           | IWV      |             |
|                   |             | DCM (OR)                        | 0.59 (0.36; 0.98)    | 4.2×10 <sup>-2</sup>  | 0.260     | 16           | MR Egger |             |
|                   |             | AF (OR)                         | 1.12 (1.09; 1.15)    | 2.2×10 <sup>-16</sup> | 0.577     | 15           | IWV      |             |
|                   |             | CHD (OR)                        | 0.99 (0.97; 1.01)    | 3.3×10 <sup>-1</sup>  | 0.850     | 15           | IWV      |             |
|                   |             | cIMT (mm)                       | -0.00 (-0.00; 0.00)  | 2.9×10 <sup>-1</sup>  | 0.664     | 15           | IWV      |             |
|                   |             | Carotid plaque (OR)             | 0.93 (0.88; 0.98)    | 1.2×10 <sup>-2</sup>  | 0.741     | 13           | IWV      |             |
|                   |             | Any stroke (OR)                 | 1.05 (1.02; 1.08)    | 4.9×10 <sup>-4</sup>  | 0.766     | 15           | IWV      |             |
|                   |             | Any ischemic stroke (OR)        | 1.01 (0.91; 1.11)    | 9.2×10 <sup>-1</sup>  | 0.738     | 17           | MR Egger |             |
|                   |             | LDL cholesterol (mmol/l)        | -0.01 (-0.03; 0.02)  | 5.9×10 <sup>-1</sup>  | 0.936     | 18           | MR Egger |             |
|                   |             | Apolipoprotein B (g/l)          | -0.01 (-0.01; -0.00) | 1.5×10 <sup>-10</sup> | 0.987     | 18           | IWV      |             |
|                   |             | Triglycerides (mmol/l)          | -0.02 (-0.05; 0.00)  | 8.6×10 <sup>-2</sup>  | 0.854     | 18           | MR Egger |             |
|                   |             | Cholesterol (mmol/l)            | -0.03 (-0.04; -0.02) | 1.6×10 <sup>-10</sup> | 0.804     | 18           | IWV      |             |
|                   |             | HDL cholesterol (mmol/l)        | 0.01 (0.00; 0.01)    | 9.7×10 <sup>-6</sup>  | 0.702     | 18           | IWV      |             |
|                   |             | Apolipoprotein A1 (g/l)         | 0.00 (0.00; 0.01)    | 3.9×10 <sup>-5</sup>  | 0.732     | 18           | IWV      |             |
|                   |             | Glucose (mmol/l)                | -0.02 (-0.03; -0.01) | 3.4×10 <sup>-4</sup>  | 0.978     | 18           | IWV      |             |
|                   |             | Glycated haemoglobin (mmol/mol) | -0.06 (-0.25; 0.13)  | 5.2×10 <sup>-1</sup>  | 0.868     | 17           | MR Egger |             |
|                   |             | T2DM (OR)                       | 1.02 (1.00; 1.04)    | 4.5×10 <sup>-2</sup>  | 0.822     | 15           | IWV      |             |
|                   |             | BMI (SD)                        | 0.02 (0.02; 0.03)    | 2.2×10 <sup>-9</sup>  | 0.033     | 12           | IWV      |             |
|                   |             | SBP (mmHg)                      | -0.29 (-0.42; -0.16) | 8.4×10 <sup>-6</sup>  | <0.001    | 10           | IWV      |             |
|                   |             | DBP (mmHg)                      | -0.16 (-0.37; 0.06)  | 1.5×10 <sup>-1</sup>  | 0.052     | 17           | MR Egger |             |
|                   |             | ECG heart rate (exercise) (BPM) | -0.25 (-0.53; 0.02)  | 7.3×10 <sup>-2</sup>  | 0.850     | 18           | IWV      |             |
|                   |             | ECG load (exercise) (Watts)     | 0.07 (-1.38; 1.52)   | 9.2×10 <sup>-1</sup>  | 0.063     | 18           | MR Egger |             |
|                   |             | Asthma (OR)                     | 1.10 (1.02; 1.18)    | 1.7×10 <sup>-2</sup>  | 0.033     | 17           | MR Egger |             |
|                   |             | CRP (log(mg/L))                 | 0.00 (-0.01; 0.02)   | 7.1×10 <sup>-1</sup>  | 0.691     | 14           | IWV      |             |
|                   |             | eGFR (SD of log(eGFR))          | 0.00 (0.00; 0.00)    | 3.2×10 <sup>-10</sup> | 0.445     | 15           | IWV      |             |
|                   |             | BUN (mg/dl)                     | 0.01 (0.00; 0.01)    | 3.8×10 <sup>-4</sup>  | 0.898     | 15           | IWV      |             |
|                   |             | CKD (OR)                        | 1.00 (0.90; 1.10)    | 9.3×10 <sup>-1</sup>  | 0.259     | 17           | MR Egger |             |
|                   |             | Alzheimer's (OR)                | 1.01 (1.00; 1.02)    | 5.1×10 <sup>-2</sup>  | 0.300     | 15           | IWV      |             |
|                   |             | Parkinson's (OR)                | 1.10 (0.89; 1.36)    | 3.6×10 <sup>-1</sup>  | 0.758     | 16           | MR Egger |             |
|                   |             | Lewy body dementia (OR)         | 1.69 (1.18; 2.41)    | 3.9×10 <sup>-3</sup>  | 0.408     | 17           | MR Egger |             |
|                   |             | Breast cancer (OR)              | 0.97 (0.88; 1.08)    | 6.4×10 <sup>-1</sup>  | 0.401     | 17           | MR Egger |             |
|                   |             | Lung cancer (OR)                | 0.91 (0.69; 1.20)    | 4.9×10 <sup>-1</sup>  | 0.824     | 17           | MR Egger |             |
|                   |             | Colon cancer (OR)               | 1.11 (0.89; 1.38)    | 3.7×10 <sup>-1</sup>  | 0.438     | 17           | MR Egger |             |
|                   |             | Prostate cancer (OR)            | 1.21 (1.05; 1.38)    | 6.7×10 <sup>-3</sup>  | 0.444     | 17           | MR Egger |             |
| EPHA1 (P21709)    | Drugged     | HF (OR)                         | 1.01 (0.98; 1.03)    | 7.1×10 <sup>-1</sup>  | 0.601     | 17           | MR Egger | Interval    |
|                   |             | Non-ischemic CM (OR)            | 0.97 (0.90; 1.03)    | 3.0×10 <sup>-1</sup>  | 0.264     | 16           | IWV      |             |
|                   |             | DCM (OR)                        | 1.14 (1.05; 1.23)    | 1.0×10 <sup>-3</sup>  | 0.092     | 17           | IWV      |             |
|                   |             | AF (OR)                         | 1.01 (0.99; 1.04)    | 3.1×10 <sup>-1</sup>  | 0.394     | 16           | MR Egger |             |
|                   |             | CHD (OR)                        | 1.00 (0.96; 1.04)    | 9.6×10 <sup>-1</sup>  | 0.151     | 16           | MR Egger |             |
|                   |             | cIMT (mm)                       | 0.00 (-0.00; 0.00)   | 1.6×10 <sup>-1</sup>  | 0.265     | 17           | IWV      |             |
|                   |             | Carotid plaque (OR)             | 0.97 (0.92; 1.03)    | 3.3×10 <sup>-1</sup>  | 0.437     | 17           | MR Egger |             |
|                   |             | Any stroke (OR)                 | 1.01 (0.97; 1.04)    | 7.9×10 <sup>-1</sup>  | 0.210     | 17           | MR Egger |             |
|                   |             | Any ischemic stroke (OR)        | 1.01 (0.97; 1.06)    | 5.5×10 <sup>-1</sup>  | 0.055     | 17           | MR Egger |             |
|                   |             | LDL cholesterol (mmol/l)        | -0.02 (-0.03; -0.00) | 8.5×10 <sup>-3</sup>  | 0.281     | 15           | MR Egger |             |
|                   |             | Apolipoprotein B (g/l)          | -0.00 (-0.01; -0.00) | 2.6×10 <sup>-2</sup>  | 0.274     | 15           | MR Egger |             |
|                   |             | Triglycerides (mmol/l)          | 0.00 (-0.01; 0.01)   | 9.1×10 <sup>-1</sup>  | 0.826     | 16           | MR Egger |             |
|                   |             | Cholesterol (mmol/l)            | -0.02 (-0.04; -0.01) | 6.7×10 <sup>-3</sup>  | 0.198     | 15           | MR Egger |             |
|                   |             | HDL cholesterol (mmol/l)        | -0.00 (-0.01; -0.00) | 6.1×10 <sup>-5</sup>  | 0.331     | 17           | IWV      |             |
|                   |             | Apolipoprotein A1 (g/l)         | -0.01 (-0.01; -0.00) | 5.4×10 <sup>-3</sup>  | 0.249     | 16           | MR Egger |             |
|                   |             | Glucose (mmol/l)                | 0.03 (0.01; 0.04)    | 1.8×10 <sup>-3</sup>  | 0.512     | 15           | MR Egger |             |
|                   |             | Glycated haemoglobin (mmol/mol) | -0.05 (-0.08; -0.02) | 8.2×10 <sup>-4</sup>  | 0.021     | 17           | IWV      |             |
|                   |             | T2DM (OR)                       | 1.01 (0.98; 1.03)    | 5.6×10 <sup>-1</sup>  | 0.666     | 16           | MR Egger |             |
|                   |             | BMI (SD)                        | 0.00 (-0.01; 0.01)   | 6.5×10 <sup>-1</sup>  | 0.265     | 16           | MR Egger |             |
|                   |             | SBP (mmHg)                      | -0.05 (-0.16; 0.07)  | 4.2×10 <sup>-1</sup>  | 0.009     | 16           | MR Egger |             |
|                   |             | DBP (mmHg)                      | 0.06 (0.02; 0.11)    | 6.2×10 <sup>-3</sup>  | 0.048     | 13           | IWV      |             |
|                   |             | ECG heart rate (exercise) (BPM) | 0.32 (0.08; 0.55)    | 8.2×10 <sup>-3</sup>  | 0.107     | 15           | IWV      |             |
|                   |             | ECG load (exercise) (Watts)     | -0.43 (-0.63; -0.24) | 1.3×10 <sup>-5</sup>  | 0.909     | 17           | IWV      |             |

**Table S16:** Phenome-wide drug target MR scan of proteins with a prioritized CMR association. (*continued*)

| Protein (uniprot)               | Protein set          | Trait                           | Estimate (95%CI)     | P-value               | Q p-value           | No. Variants         | MR model | PQTL source |          |          |
|---------------------------------|----------------------|---------------------------------|----------------------|-----------------------|---------------------|----------------------|----------|-------------|----------|----------|
|                                 |                      | Asthma (OR)                     | 1.03 (1.02; 1.05)    | 1.5×10 <sup>-6</sup>  | 0.602               | 16                   | IWV      |             |          |          |
|                                 |                      | CRP (log(mg/L))                 | -0.00 (-0.02; 0.01)  | 5.0×10 <sup>-1</sup>  | 0.501               | 14                   | IWV      |             |          |          |
|                                 |                      | eGFR (SD of log(eGFR))          | -0.00 (-0.00; -0.00) | 4.4×10 <sup>-3</sup>  | 0.497               | 15                   | IWV      |             |          |          |
|                                 |                      | BUN (mg/dl)                     | -0.00 (-0.01; -0.00) | 1.4×10 <sup>-2</sup>  | 0.431               | 16                   | MR Egger |             |          |          |
|                                 |                      | CKD (OR)                        | 1.02 (1.01; 1.04)    | 4.1×10 <sup>-3</sup>  | 0.566               | 16                   | IWV      |             |          |          |
|                                 |                      | Alzheimer's (OR)                | 0.98 (0.96; 1.00)    | 2.4×10 <sup>-2</sup>  | 0.053               | 8                    | IWV      |             |          |          |
|                                 |                      | Parkinson's (OR)                | 1.04 (0.99; 1.09)    | 8.9×10 <sup>-2</sup>  | 0.058               | 15                   | IWV      |             |          |          |
|                                 |                      | Lewy body dementia (OR)         | 1.04 (0.96; 1.12)    | 3.7×10 <sup>-1</sup>  | 0.201               | 14                   | IWV      |             |          |          |
|                                 |                      | Breast cancer (OR)              | 1.00 (0.94; 1.05)    | 9.0×10 <sup>-1</sup>  | 0.053               | 16                   | MR Egger |             |          |          |
|                                 |                      | Lung cancer (OR)                | 0.93 (0.83; 1.04)    | 2.0×10 <sup>-1</sup>  | 0.867               | 15                   | MR Egger |             |          |          |
|                                 |                      | Colon cancer (OR)               | 0.90 (0.80; 1.02)    | 9.8×10 <sup>-2</sup>  | 0.014               | 16                   | MR Egger |             |          |          |
|                                 |                      | Prostate cancer (OR)            | 0.97 (0.92; 1.03)    | 3.5×10 <sup>-1</sup>  | 0.978               | 16                   | MR Egger |             |          |          |
|                                 |                      | EPHB6 (O15197)                  | Drugged              | HF (OR)               | 0.96 (0.87; 1.06)   | 3.8×10 <sup>-1</sup> | 0.664    | 10          | MR Egger | Interval |
|                                 |                      |                                 |                      | Non-ischemic CM (OR)  | 1.02 (0.83; 1.24)   | 8.8×10 <sup>-1</sup> | 0.113    | 11          | IWV      |          |
|                                 |                      |                                 |                      | DCM (OR)              | 1.07 (0.95; 1.20)   | 2.8×10 <sup>-1</sup> | 0.031    | 10          | IWV      |          |
|                                 |                      |                                 |                      | AF (OR)               | 1.05 (1.02; 1.09)   | 6.5×10 <sup>-4</sup> | 0.532    | 12          | IWV      |          |
|                                 |                      |                                 |                      | CHD (OR)              | 1.12 (1.00; 1.25)   | 5.5×10 <sup>-2</sup> | 0.720    | 11          | MR Egger |          |
|                                 |                      |                                 |                      | clMT (mm)             | -0.00 (-0.01; 0.00) | 5.5×10 <sup>-2</sup> | 0.139    | 13          | IWV      |          |
|                                 |                      |                                 |                      | Carotid plaque (OR)   | 1.05 (1.00; 1.10)   | 5.3×10 <sup>-2</sup> | 0.497    | 12          | IWV      |          |
| Any stroke (OR)                 | 0.99 (0.96; 1.02)    |                                 |                      | 4.1×10 <sup>-1</sup>  | 0.328               | 13                   | IWV      |             |          |          |
| Any ischemic stroke (OR)        | 1.01 (0.98; 1.04)    |                                 |                      | 5.1×10 <sup>-1</sup>  | 0.530               | 13                   | IWV      |             |          |          |
| LDL cholesterol (mmol/l)        | -0.00 (-0.01; 0.00)  |                                 |                      | 4.3×10 <sup>-1</sup>  | 0.888               | 13                   | IWV      |             |          |          |
| Apolipoprotein B (g/l)          | -0.00 (-0.00; 0.00)  |                                 |                      | 4.2×10 <sup>-1</sup>  | 0.737               | 13                   | IWV      |             |          |          |
| Triglycerides (mmol/l)          | -0.00 (-0.01; 0.01)  |                                 |                      | 6.0×10 <sup>-1</sup>  | 0.142               | 13                   | IWV      |             |          |          |
| Cholesterol (mmol/l)            | -0.01 (-0.02; 0.00)  |                                 |                      | 1.7×10 <sup>-1</sup>  | 0.944               | 13                   | IWV      |             |          |          |
| HDL cholesterol (mmol/l)        | -0.00 (-0.00; 0.00)  |                                 |                      | 3.6×10 <sup>-1</sup>  | 0.752               | 13                   | IWV      |             |          |          |
| Apolipoprotein A1 (g/l)         | -0.00 (-0.00; 0.00)  |                                 |                      | 5.2×10 <sup>-2</sup>  | 0.855               | 13                   | IWV      |             |          |          |
| Glucose (mmol/l)                | 0.01 (-0.00; 0.02)   |                                 |                      | 7.7×10 <sup>-2</sup>  | 0.857               | 12                   | IWV      |             |          |          |
| Glycated haemoglobin (mmol/mol) | -0.06 (-0.14; 0.01)  |                                 |                      | 7.5×10 <sup>-2</sup>  | 0.110               | 13                   | IWV      |             |          |          |
| T2DM (OR)                       | 0.99 (0.96; 1.02)    |                                 |                      | 5.5×10 <sup>-1</sup>  | 0.689               | 11                   | IWV      |             |          |          |
| BMI (SD)                        | 0.01 (-0.01; 0.03)   |                                 |                      | 3.9×10 <sup>-1</sup>  | 0.191               | 11                   | MR Egger |             |          |          |
| SBP (mmHg)                      | 0.31 (-0.42; 1.04)   |                                 |                      | 4.0×10 <sup>-1</sup>  | 0.072               | 7                    | MR Egger |             |          |          |
| DBP (mmHg)                      | 0.02 (-0.10; 0.14)   |                                 |                      | 7.3×10 <sup>-1</sup>  | 0.339               | 8                    | IWV      |             |          |          |
| ECG heart rate (exercise) (BPM) | -0.29 (-0.62; 0.04)  |                                 |                      | 8.0×10 <sup>-2</sup>  | 0.670               | 12                   | IWV      |             |          |          |
| ECG load (exercise) (Watts)     | -0.66 (-1.11; -0.21) |                                 |                      | 4.0×10 <sup>-3</sup>  | 0.114               | 13                   | IWV      |             |          |          |
| Asthma (OR)                     | 0.98 (0.96; 1.02)    |                                 |                      | 3.3×10 <sup>-1</sup>  | 0.052               | 13                   | IWV      |             |          |          |
| CRP (log(mg/L))                 | -0.00 (-0.02; 0.01)  |                                 |                      | 6.6×10 <sup>-1</sup>  | 0.630               | 11                   | IWV      |             |          |          |
| eGFR (SD of log(eGFR))          | -0.00 (-0.01; 0.00)  |                                 |                      | 2.3×10 <sup>-1</sup>  | 0.091               | 11                   | MR Egger |             |          |          |
| BUN (mg/dl)                     | -0.00 (-0.01; 0.00)  |                                 |                      | 7.0×10 <sup>-1</sup>  | 0.089               | 11                   | IWV      |             |          |          |
| CKD (OR)                        | 0.98 (0.93; 1.03)    |                                 |                      | 3.6×10 <sup>-1</sup>  | 0.500               | 10                   | IWV      |             |          |          |
| Alzheimer's (OR)                | 1.01 (1.00; 1.02)    |                                 |                      | 1.5×10 <sup>-2</sup>  | 0.203               | 12                   | IWV      |             |          |          |
| Parkinson's (OR)                | 1.21 (0.95; 1.55)    |                                 |                      | 1.2×10 <sup>-1</sup>  | 0.462               | 12                   | MR Egger |             |          |          |
| Lewy body dementia (OR)         | 1.02 (0.86; 1.20)    |                                 |                      | 8.5×10 <sup>-1</sup>  | 0.755               | 10                   | IWV      |             |          |          |
| Breast cancer (OR)              | 1.04 (0.99; 1.08)    |                                 |                      | 8.9×10 <sup>-2</sup>  | 0.399               | 12                   | IWV      |             |          |          |
| Lung cancer (OR)                | 0.85 (0.76; 0.95)    |                                 |                      | 3.3×10 <sup>-3</sup>  | 0.035               | 11                   | IWV      |             |          |          |
| Colon cancer (OR)               | 1.01 (0.74; 1.38)    |                                 |                      | 9.5×10 <sup>-1</sup>  | 0.713               | 11                   | MR Egger |             |          |          |
| Prostate cancer (OR)            | 1.00 (0.82; 1.21)    |                                 |                      | 9.8×10 <sup>-1</sup>  | 0.400               | 11                   | MR Egger |             |          |          |
| FGFR3 (P22607)                  | Drugged              |                                 |                      | HF (OR)               | 0.92 (0.86; 0.98)   | 1.4×10 <sup>-2</sup> | 0.174    | 7           | IWV      | Interval |
|                                 |                      |                                 |                      | Non-ischemic CM (OR)  | 1.09 (0.85; 1.39)   | 4.9×10 <sup>-1</sup> | 0.587    | 5           | IWV      |          |
|                                 |                      |                                 |                      | DCM (OR)              | 1.49 (1.22; 1.83)   | 1.2×10 <sup>-4</sup> | 0.799    | 6           | IWV      |          |
|                                 |                      |                                 |                      | AF (OR)               | 0.97 (0.92; 1.01)   | 1.6×10 <sup>-1</sup> | 0.314    | 8           | IWV      |          |
|                                 |                      | CHD (OR)                        | 0.98 (0.91; 1.06)    | 6.1×10 <sup>-1</sup>  | 0.074               | 8                    | IWV      |             |          |          |
|                                 |                      | clMT (mm)                       | -0.00 (-0.01; 0.01)  | 9.4×10 <sup>-1</sup>  | 0.509               | 7                    | IWV      |             |          |          |
|                                 |                      | Carotid plaque (OR)             | 0.98 (0.81; 1.19)    | 8.4×10 <sup>-1</sup>  | 0.091               | 7                    | IWV      |             |          |          |
|                                 |                      | Any stroke (OR)                 | 0.93 (0.84; 1.02)    | 1.2×10 <sup>-1</sup>  | 0.101               | 7                    | IWV      |             |          |          |
|                                 |                      | Any ischemic stroke (OR)        | 0.91 (0.82; 1.01)    | 8.1×10 <sup>-2</sup>  | 0.074               | 7                    | IWV      |             |          |          |
|                                 |                      | LDL cholesterol (mmol/l)        | 0.01 (0.00; 0.02)    | 6.3×10 <sup>-3</sup>  | 0.300               | 9                    | IWV      |             |          |          |
|                                 |                      | Apolipoprotein B (g/l)          | 0.00 (0.00; 0.01)    | 4.4×10 <sup>-2</sup>  | 0.722               | 9                    | IWV      |             |          |          |
|                                 |                      | Triglycerides (mmol/l)          | -0.00 (-0.02; 0.01)  | 8.8×10 <sup>-1</sup>  | 0.124               | 8                    | IWV      |             |          |          |
|                                 |                      | Cholesterol (mmol/l)            | 0.01 (-0.00; 0.02)   | 1.0×10 <sup>-1</sup>  | 0.337               | 9                    | IWV      |             |          |          |
|                                 |                      | HDL cholesterol (mmol/l)        | -0.00 (-0.01; 0.00)  | 1.7×10 <sup>-1</sup>  | 0.039               | 9                    | IWV      |             |          |          |
|                                 |                      | Apolipoprotein A1 (g/l)         | -0.00 (-0.00; 0.00)  | 7.6×10 <sup>-1</sup>  | 0.323               | 9                    | IWV      |             |          |          |
|                                 |                      | Glucose (mmol/l)                | -0.01 (-0.02; 0.00)  | 1.3×10 <sup>-1</sup>  | 0.431               | 9                    | IWV      |             |          |          |
|                                 |                      | Glycated haemoglobin (mmol/mol) | -0.05 (-0.12; 0.03)  | 2.3×10 <sup>-1</sup>  | 0.345               | 9                    | IWV      |             |          |          |
|                                 |                      | T2DM (OR)                       | 1.19 (1.13; 1.25)    | 5.0×10 <sup>-13</sup> | 0.392               | 5                    | IWV      |             |          |          |
|                                 |                      | BMI (SD)                        | -0.05 (-0.12; 0.02)  | 2.0×10 <sup>-1</sup>  | 0.226               | 7                    | MR Egger |             |          |          |

**Table S16:** Phenome-wide drug target MR scan of proteins with a prioritized CMR association. (*continued*)

| Protein (uniprot) | Protein set | Trait                           | Estimate (95%CI)     | P-value               | Q p-value | No. Variants | MR model | PQTL source |
|-------------------|-------------|---------------------------------|----------------------|-----------------------|-----------|--------------|----------|-------------|
|                   |             | SBP (mmHg)                      | 0.35 (-0.01; 0.71)   | 5.7×10 <sup>-2</sup>  | 0.041     | 3            | IVW      |             |
|                   |             | DBP (mmHg)                      | 0.04 (-0.27; 0.35)   | 8.0×10 <sup>-1</sup>  | 0.110     | 3            | IVW      |             |
|                   |             | ECG heart rate (exercise) (BPM) | -0.19 (-0.59; 0.21)  | 3.6×10 <sup>-1</sup>  | 0.478     | 9            | IVW      |             |
|                   |             | ECG load (exercise) (Watts)     | 0.86 (0.41; 1.31)    | 2.0×10 <sup>-4</sup>  | 0.946     | 9            | IVW      |             |
|                   |             | Asthma (OR)                     | 0.91 (0.76; 1.09)    | 3.0×10 <sup>-1</sup>  | 0.003     | 8            | MR Egger |             |
|                   |             | CRP (log(mg/L))                 | -0.02 (-0.05; 0.02)  | 3.5×10 <sup>-1</sup>  | 0.871     | 6            | IVW      |             |
|                   |             | eGFR (SD of log(eGFR))          | -0.00 (-0.01; -0.00) | 1.6×10 <sup>-2</sup>  | 0.079     | 6            | IVW      |             |
|                   |             | BUN (mg/dl)                     | 0.01 (0.00; 0.02)    | 3.0×10 <sup>-2</sup>  | 0.055     | 6            | IVW      |             |
|                   |             | CKD (OR)                        | 1.06 (0.98; 1.14)    | 1.3×10 <sup>-1</sup>  | 0.290     | 6            | IVW      |             |
|                   |             | Alzheimer's (OR)                | 1.00 (0.98; 1.01)    | 4.7×10 <sup>-1</sup>  | 0.809     | 8            | IVW      |             |
|                   |             | Parkinson's (OR)                | 1.33 (1.16; 1.51)    | 2.6×10 <sup>-5</sup>  | 0.573     | 6            | IVW      |             |
|                   |             | Lewy body dementia (OR)         | 1.03 (0.76; 1.39)    | 8.7×10 <sup>-1</sup>  | 0.950     | 4            | IVW      |             |
|                   |             | Breast cancer (OR)              | 0.74 (0.50; 1.10)    | 1.4×10 <sup>-1</sup>  | 0.775     | 7            | MR Egger |             |
|                   |             | Lung cancer (OR)                | 2.18 (0.80; 5.92)    | 1.3×10 <sup>-1</sup>  | 0.430     | 7            | MR Egger |             |
|                   |             | Colon cancer (OR)               | 0.99 (0.85; 1.16)    | 9.3×10 <sup>-1</sup>  | 0.695     | 7            | IVW      |             |
|                   |             | Prostate cancer (OR)            | 1.08 (0.98; 1.20)    | 1.3×10 <sup>-1</sup>  | 0.927     | 7            | IVW      |             |
| IL17RA (Q96F46)   | Drugged     | HF (OR)                         | 0.97 (0.96; 0.98)    | 5.1×10 <sup>-8</sup>  | 0.003     | 33           | MR Egger | Interval    |
|                   |             | Non-ischemic CM (OR)            | 0.94 (0.92; 0.96)    | 5.0×10 <sup>-7</sup>  | 0.239     | 44           | IVW      |             |
|                   |             | DCM (OR)                        | 0.93 (0.89; 0.96)    | 4.3×10 <sup>-5</sup>  | <0.001    | 35           | IVW      |             |
|                   |             | AF (OR)                         | 1.00 (1.00; 1.01)    | 2.1×10 <sup>-1</sup>  | <0.001    | 41           | IVW      |             |
|                   |             | CHD (OR)                        | 1.00 (0.99; 1.00)    | 4.3×10 <sup>-1</sup>  | 0.010     | 38           | IVW      |             |
|                   |             | clMT (mm)                       | -0.00 (-0.00; 0.00)  | 2.5×10 <sup>-1</sup>  | 0.011     | 37           | IVW      |             |
|                   |             | Carotid plaque (OR)             | 1.02 (0.96; 1.07)    | 5.9×10 <sup>-1</sup>  | 0.035     | 23           | MR Egger |             |
|                   |             | Any stroke (OR)                 | 1.00 (0.99; 1.01)    | 9.0×10 <sup>-1</sup>  | 0.076     | 38           | IVW      |             |
|                   |             | Any ischemic stroke (OR)        | 1.01 (1.00; 1.01)    | 8.9×10 <sup>-2</sup>  | 0.031     | 39           | IVW      |             |
|                   |             | LDL cholesterol (mmol/l)        | 0.00 (0.00; 0.01)    | 3.6×10 <sup>-3</sup>  | 0.360     | 50           | MR Egger |             |
|                   |             | Apolipoprotein B (g/l)          | 0.00 (-0.00; 0.00)   | 5.9×10 <sup>-2</sup>  | 0.052     | 48           | MR Egger |             |
|                   |             | Triglycerides (mmol/l)          | 0.01 (0.00; 0.01)    | 3.4×10 <sup>-3</sup>  | <0.001    | 38           | MR Egger |             |
|                   |             | Cholesterol (mmol/l)            | 0.00 (0.00; 0.00)    | 3.7×10 <sup>-2</sup>  | 0.075     | 48           | IVW      |             |
|                   |             | HDL cholesterol (mmol/l)        | 0.00 (0.00; 0.00)    | 3.0×10 <sup>-2</sup>  | <0.001    | 45           | MR Egger |             |
|                   |             | Apolipoprotein A1 (g/l)         | 0.00 (0.00; 0.00)    | 1.8×10 <sup>-2</sup>  | 0.003     | 47           | IVW      |             |
|                   |             | Glucose (mmol/l)                | 0.00 (-0.00; 0.01)   | 7.9×10 <sup>-1</sup>  | 0.194     | 44           | MR Egger |             |
|                   |             | Glycated haemoglobin (mmol/mol) | 0.02 (0.01; 0.03)    | 2.4×10 <sup>-3</sup>  | <0.001    | 41           | IVW      |             |
|                   |             | T2DM (OR)                       | 1.00 (1.00; 1.01)    | 1.2×10 <sup>-1</sup>  | 0.305     | 36           | IVW      |             |
|                   |             | BMI (SD)                        | -0.00 (-0.00; -0.00) | 2.2×10 <sup>-2</sup>  | <0.001    | 42           | MR Egger |             |
|                   |             | SBP (mmHg)                      | 0.06 (0.02; 0.10)    | 5.6×10 <sup>-3</sup>  | 0.015     | 29           | MR Egger |             |
|                   |             | DBP (mmHg)                      | 0.03 (0.02; 0.04)    | 6.5×10 <sup>-5</sup>  | 0.010     | 33           | IVW      |             |
|                   |             | ECG heart rate (exercise) (BPM) | -0.06 (-0.19; 0.06)  | 3.4×10 <sup>-1</sup>  | 0.140     | 49           | MR Egger |             |
|                   |             | ECG load (exercise) (Watts)     | -0.17 (-0.31; -0.03) | 1.6×10 <sup>-2</sup>  | 0.224     | 47           | MR Egger |             |
|                   |             | Asthma (OR)                     | 1.01 (1.00; 1.01)    | 6.1×10 <sup>-2</sup>  | <0.001    | 40           | IVW      |             |
|                   |             | CRP (log(mg/L))                 | -0.01 (-0.01; -0.00) | 1.4×10 <sup>-6</sup>  | 0.006     | 38           | IVW      |             |
|                   |             | eGFR (SD of log(eGFR))          | 0.00 (0.00; 0.00)    | 1.6×10 <sup>-8</sup>  | 0.102     | 44           | MR Egger |             |
|                   |             | BUN (mg/dl)                     | -0.00 (-0.00; -0.00) | 5.6×10 <sup>-8</sup>  | 0.044     | 41           | IVW      |             |
|                   |             | CKD (OR)                        | 0.96 (0.95; 0.97)    | 1.2×10 <sup>-10</sup> | <0.001    | 40           | MR Egger |             |
|                   |             | Alzheimer's (OR)                | 1.00 (0.99; 1.00)    | 4.5×10 <sup>-4</sup>  | 0.003     | 44           | MR Egger |             |
|                   |             | Parkinson's (OR)                | 0.99 (0.97; 1.00)    | 6.8×10 <sup>-2</sup>  | 0.081     | 43           | IVW      |             |
|                   |             | Lewy body dementia (OR)         | None                 | None                  | None      | None         | None     |             |
|                   |             | Breast cancer (OR)              | 1.03 (1.02; 1.04)    | 7.0×10 <sup>-7</sup>  | <0.001    | 35           | IVW      |             |
|                   |             | Lung cancer (OR)                | 0.93 (0.90; 0.97)    | 4.5×10 <sup>-4</sup>  | <0.001    | 38           | MR Egger |             |
|                   |             | Colon cancer (OR)               | 1.06 (1.04; 1.08)    | 2.8×10 <sup>-9</sup>  | <0.001    | 41           | IVW      |             |
|                   |             | Prostate cancer (OR)            | 0.99 (0.98; 1.00)    | 7.0×10 <sup>-3</sup>  | 0.644     | 40           | IVW      |             |
| IL112B (P29460)   | Drugged     | HF (OR)                         | 0.96 (0.91; 1.01)    | 1.2×10 <sup>-1</sup>  | 0.166     | 14           | MR Egger | Interval    |
|                   |             | Non-ischemic CM (OR)            | 1.01 (0.77; 1.33)    | 9.4×10 <sup>-1</sup>  | 0.011     | 15           | MR Egger |             |
|                   |             | DCM (OR)                        | 0.82 (0.74; 0.90)    | 5.8×10 <sup>-5</sup>  | 0.709     | 15           | IVW      |             |
|                   |             | AF (OR)                         | 0.95 (0.90; 1.01)    | 1.1×10 <sup>-1</sup>  | 0.438     | 15           | MR Egger |             |
|                   |             | CHD (OR)                        | 0.99 (0.97; 1.01)    | 4.3×10 <sup>-1</sup>  | 0.326     | 14           | IVW      |             |
|                   |             | clMT (mm)                       | -0.00 (-0.01; 0.00)  | 1.6×10 <sup>-1</sup>  | 0.376     | 15           | MR Egger |             |
|                   |             | Carotid plaque (OR)             | 0.86 (0.82; 0.91)    | 3.5×10 <sup>-8</sup>  | 0.047     | 12           | IVW      |             |
|                   |             | Any stroke (OR)                 | 0.97 (0.92; 1.02)    | 2.8×10 <sup>-1</sup>  | 0.431     | 15           | MR Egger |             |
|                   |             | Any ischemic stroke (OR)        | 0.94 (0.88; 1.00)    | 4.1×10 <sup>-2</sup>  | 0.260     | 15           | MR Egger |             |
|                   |             | LDL cholesterol (mmol/l)        | -0.00 (-0.01; 0.00)  | 1.3×10 <sup>-1</sup>  | 0.013     | 14           | IVW      |             |
|                   |             | Apolipoprotein B (g/l)          | -0.00 (-0.00; -0.00) | 4.5×10 <sup>-2</sup>  | 0.007     | 14           | IVW      |             |
|                   |             | Triglycerides (mmol/l)          | -0.03 (-0.05; -0.01) | 2.9×10 <sup>-4</sup>  | 0.019     | 16           | MR Egger |             |
|                   |             | Cholesterol (mmol/l)            | 0.00 (-0.01; 0.01)   | 5.5×10 <sup>-1</sup>  | <0.001    | 15           | IVW      |             |
|                   |             | HDL cholesterol (mmol/l)        | 0.00 (0.00; 0.01)    | 4.0×10 <sup>-2</sup>  | 0.385     | 12           | IVW      |             |
|                   |             | Apolipoprotein A1 (g/l)         | 0.00 (-0.00; 0.00)   | 6.1×10 <sup>-1</sup>  | 0.310     | 12           | IVW      |             |



**Table S16:** Phenome-wide drug target MR scan of proteins with a prioritized CMR association. (*continued*)

| Protein (uniprot) | Protein set | Trait                           | Estimate (95%CI)     | P-value                | Q p-value | No. Variants | MR model | PQTL source |
|-------------------|-------------|---------------------------------|----------------------|------------------------|-----------|--------------|----------|-------------|
|                   |             | Glucose (mmol/l)                | -0.00 (-0.02; 0.02)  | 8.5×10 <sup>-1</sup>   | 0.430     | 16           | MR Egger |             |
|                   |             | Glycated haemoglobin (mmol/mol) | 0.01 (-0.03; 0.05)   | 6.7×10 <sup>-1</sup>   | 0.839     | 14           | IVW      |             |
|                   |             | T2DM (OR)                       | 0.97 (0.95; 0.99)    | 1.2×10 <sup>-3</sup>   | 0.676     | 15           | IVW      |             |
|                   |             | BMI (SD)                        | -0.04 (-0.05; -0.03) | 1.0×10 <sup>-100</sup> | 0.004     | 11           | IVW      |             |
|                   |             | SBP (mmHg)                      | 0.04 (-0.16; 0.24)   | 7.1×10 <sup>-1</sup>   | 0.022     | 13           | MR Egger |             |
|                   |             | DBP (mmHg)                      | 0.08 (-0.03; 0.18)   | 1.4×10 <sup>-1</sup>   | 0.005     | 14           | MR Egger |             |
|                   |             | ECG heart rate (exercise) (BPM) | -0.39 (-0.70; -0.08) | 1.3×10 <sup>-2</sup>   | 0.100     | 14           | IVW      |             |
|                   |             | ECG load (exercise) (Watts)     | 0.42 (0.16; 0.69)    | 1.8×10 <sup>-3</sup>   | 0.398     | 16           | IVW      |             |
|                   |             | Asthma (OR)                     | None                 | None                   | None      | None         | None     |             |
|                   |             | CRP (log(mg/L))                 | 0.05 (0.02; 0.07)    | 4.3×10 <sup>-4</sup>   | 0.262     | 15           | MR Egger |             |
|                   |             | eGFR (SD of log(eGFR))          | -0.01 (-0.01; -0.00) | 1.2×10 <sup>-3</sup>   | 0.134     | 15           | MR Egger |             |
|                   |             | BUN (mg/dl)                     | 0.02 (0.01; 0.03)    | 4.5×10 <sup>-5</sup>   | 0.785     | 14           | MR Egger |             |
|                   |             | CKD (OR)                        | 1.03 (0.97; 1.08)    | 3.4×10 <sup>-1</sup>   | 0.617     | 15           | MR Egger |             |
|                   |             | Alzheimer's (OR)                | 1.00 (0.99; 1.00)    | 3.8×10 <sup>-1</sup>   | 0.014     | 14           | IVW      |             |
|                   |             | Parkinson's (OR)                | 0.92 (0.77; 1.09)    | 3.2×10 <sup>-1</sup>   | 0.991     | 14           | MR Egger |             |
|                   |             | Lewy body dementia (OR)         | 0.88 (0.70; 1.10)    | 2.7×10 <sup>-1</sup>   | 0.307     | 15           | MR Egger |             |
|                   |             | Breast cancer (OR)              | 1.02 (0.98; 1.05)    | 3.1×10 <sup>-1</sup>   | 0.238     | 14           | IVW      |             |
|                   |             | Lung cancer (OR)                | 0.95 (0.88; 1.02)    | 1.3×10 <sup>-1</sup>   | 0.551     | 15           | IVW      |             |
|                   |             | Colon cancer (OR)               | 1.18 (1.10; 1.26)    | 2.1×10 <sup>-6</sup>   | 0.170     | 15           | IVW      |             |
|                   |             | Prostate cancer (OR)            | 0.97 (0.89; 1.05)    | 4.6×10 <sup>-1</sup>   | 0.739     | 15           | MR Egger |             |
| IL6RA (P08887)    | Drugged     | HF (OR)                         | 0.98 (0.97; 0.99)    | 6.0×10 <sup>-3</sup>   | <0.001    | 47           | MR Egger | Scallop     |
|                   |             | Non-ischemic CM (OR)            | 1.06 (1.03; 1.10)    | 1.0×10 <sup>-3</sup>   | 0.006     | 54           | IVW      |             |
|                   |             | DCM (OR)                        | 1.01 (0.95; 1.07)    | 8.0×10 <sup>-1</sup>   | <0.001    | 62           | MR Egger |             |
|                   |             | AF (OR)                         | 0.95 (0.94; 0.96)    | 1.0×10 <sup>-100</sup> | 0.003     | 60           | MR Egger |             |
|                   |             | CHD (OR)                        | 0.94 (0.93; 0.94)    | 1.0×10 <sup>-100</sup> | <0.001    | 52           | IVW      |             |
|                   |             | cIMT (mm)                       | -0.00 (-0.00; 0.00)  | 6.6×10 <sup>-1</sup>   | 0.197     | 53           | IVW      |             |
|                   |             | Carotid plaque (OR)             | 1.01 (0.96; 1.05)    | 8.1×10 <sup>-1</sup>   | 0.194     | 42           | MR Egger |             |
|                   |             | Any stroke (OR)                 | 0.98 (0.96; 1.00)    | 2.9×10 <sup>-2</sup>   | 0.007     | 54           | MR Egger |             |
|                   |             | Any ischemic stroke (OR)        | 0.97 (0.94; 0.99)    | 1.7×10 <sup>-2</sup>   | 0.159     | 52           | MR Egger |             |
|                   |             | LDL cholesterol (mmol/l)        | 0.01 (0.00; 0.01)    | 1.6×10 <sup>-7</sup>   | 0.033     | 62           | MR Egger |             |
|                   |             | Apolipoprotein B (g/l)          | 0.00 (-0.00; 0.00)   | 2.4×10 <sup>-1</sup>   | <0.001    | 64           | IVW      |             |
|                   |             | Triglycerides (mmol/l)          | 0.01 (0.00; 0.01)    | 1.1×10 <sup>-6</sup>   | 0.039     | 63           | MR Egger |             |
|                   |             | Cholesterol (mmol/l)            | 0.01 (0.01; 0.02)    | 3.5×10 <sup>-11</sup>  | 0.073     | 60           | MR Egger |             |
|                   |             | HDL cholesterol (mmol/l)        | 0.00 (0.00; 0.00)    | 2.8×10 <sup>-14</sup>  | <0.001    | 58           | IVW      |             |
|                   |             | Apolipoprotein A1 (g/l)         | 0.00 (0.00; 0.00)    | 4.6×10 <sup>-9</sup>   | <0.001    | 52           | MR Egger |             |
|                   |             | Glucose (mmol/l)                | -0.00 (-0.01; 0.00)  | 2.9×10 <sup>-1</sup>   | 0.003     | 62           | MR Egger |             |
|                   |             | Glycated haemoglobin (mmol/mol) | -0.08 (-0.10; -0.07) | 1.0×10 <sup>-100</sup> | <0.001    | 53           | IVW      |             |
|                   |             | T2DM (OR)                       | 0.92 (0.87; 0.98)    | 8.9×10 <sup>-3</sup>   | 0.216     | 17           | MR Egger |             |
|                   |             | BMI (SD)                        | -0.03 (-0.05; -0.02) | 8.4×10 <sup>-5</sup>   | 0.445     | 17           | MR Egger |             |
|                   |             | SBP (mmHg)                      | -0.03 (-0.14; 0.09)  | 6.7×10 <sup>-1</sup>   | 0.067     | 34           | MR Egger |             |
|                   |             | DBP (mmHg)                      | -0.09 (-0.14; -0.05) | 1.1×10 <sup>-5</sup>   | 0.095     | 28           | IVW      |             |
|                   |             | ECG heart rate (exercise) (BPM) | -0.14 (-0.27; -0.02) | 2.1×10 <sup>-2</sup>   | <0.001    | 67           | MR Egger |             |
|                   |             | ECG load (exercise) (Watts)     | -0.26 (-0.40; -0.11) | 5.1×10 <sup>-4</sup>   | 0.125     | 67           | MR Egger |             |
|                   |             | Asthma (OR)                     | None                 | None                   | None      | None         | None     |             |
|                   |             | CRP (log(mg/L))                 | -0.15 (-0.20; -0.11) | 6.4×10 <sup>-12</sup>  | <0.001    | 11           | MR Egger |             |
|                   |             | eGFR (SD of log(eGFR))          | 0.00 (-0.00; 0.00)   | 1.1×10 <sup>-1</sup>   | 0.011     | 35           | IVW      |             |
|                   |             | BUN (mg/dl)                     | 0.00 (-0.00; 0.00)   | 1.9×10 <sup>-1</sup>   | 0.382     | 49           | MR Egger |             |
|                   |             | CKD (OR)                        | 1.00 (0.98; 1.01)    | 6.6×10 <sup>-1</sup>   | <0.001    | 55           | MR Egger |             |
|                   |             | Alzheimer's (OR)                | 1.01 (1.00; 1.01)    | 3.6×10 <sup>-3</sup>   | 0.015     | 43           | MR Egger |             |
|                   |             | Parkinson's (OR)                | 0.95 (0.90; 1.00)    | 5.2×10 <sup>-2</sup>   | 0.005     | 51           | MR Egger |             |
|                   |             | Lewy body dementia (OR)         | 1.09 (1.03; 1.14)    | 1.8×10 <sup>-3</sup>   | 0.266     | 63           | MR Egger |             |
|                   |             | Breast cancer (OR)              | 1.01 (0.98; 1.04)    | 5.0×10 <sup>-1</sup>   | 0.134     | 58           | MR Egger |             |
|                   |             | Lung cancer (OR)                | 1.01 (0.99; 1.03)    | 2.3×10 <sup>-1</sup>   | 0.007     | 61           | IVW      |             |
|                   |             | Colon cancer (OR)               | 0.97 (0.96; 0.99)    | 1.4×10 <sup>-3</sup>   | 0.008     | 64           | IVW      |             |
|                   |             | Prostate cancer (OR)            | 1.07 (1.04; 1.09)    | 4.6×10 <sup>-7</sup>   | 0.002     | 62           | MR Egger |             |
| LAMC2 (Q13753)    | Drugged     | HF (OR)                         | 1.02 (1.01; 1.04)    | 4.2×10 <sup>-3</sup>   | 0.443     | 27           | IVW      | Interval    |
|                   |             | Non-ischemic CM (OR)            | 0.95 (0.84; 1.07)    | 4.0×10 <sup>-1</sup>   | 0.064     | 28           | MR Egger |             |
|                   |             | DCM (OR)                        | 1.20 (1.13; 1.28)    | 1.4×10 <sup>-8</sup>   | 0.387     | 27           | IVW      |             |
|                   |             | AF (OR)                         | 0.96 (0.94; 0.99)    | 3.2×10 <sup>-3</sup>   | 0.060     | 27           | MR Egger |             |
|                   |             | CHD (OR)                        | 1.05 (1.02; 1.08)    | 1.1×10 <sup>-3</sup>   | 0.445     | 21           | MR Egger |             |
|                   |             | cIMT (mm)                       | 0.00 (-0.00; 0.00)   | 6.6×10 <sup>-1</sup>   | 0.010     | 27           | IVW      |             |
|                   |             | Carotid plaque (OR)             | 0.93 (0.90; 0.96)    | 4.8×10 <sup>-7</sup>   | 0.039     | 24           | IVW      |             |
|                   |             | Any stroke (OR)                 | 1.00 (0.97; 1.03)    | 9.9×10 <sup>-1</sup>   | <0.001    | 25           | MR Egger |             |
|                   |             | Any ischemic stroke (OR)        | 1.01 (0.98; 1.04)    | 5.5×10 <sup>-1</sup>   | 0.002     | 27           | MR Egger |             |
|                   |             | LDL cholesterol (mmol/l)        | -0.01 (-0.02; -0.01) | 1.0×10 <sup>-5</sup>   | 0.002     | 34           | MR Egger |             |
|                   |             | Apolipoprotein B (g/l)          | -0.00 (-0.00; -0.00) | 6.7×10 <sup>-4</sup>   | 0.127     | 34           | MR Egger |             |

**Table S16:** Phenome-wide drug target MR scan of proteins with a prioritized CMR association. (*continued*)

| Protein (uniprot) | Protein set | Trait                           | Estimate (95%CI)     | P-value               | Q p-value | No. Variants | MR model | PQTL source |
|-------------------|-------------|---------------------------------|----------------------|-----------------------|-----------|--------------|----------|-------------|
|                   |             | Triglycerides (mmol/l)          | 0.02 (0.01; 0.02)    | 3.8×10 <sup>-15</sup> | 0.008     | 31           | IWV      |             |
|                   |             | Cholesterol (mmol/l)            | -0.02 (-0.03; -0.01) | 5.5×10 <sup>-7</sup>  | <0.001    | 33           | MR Egger |             |
|                   |             | HDL cholesterol (mmol/l)        | -0.00 (-0.01; -0.00) | 1.2×10 <sup>-3</sup>  | <0.001    | 23           | IWV      |             |
|                   |             | Apolipoprotein A1 (g/l)         | -0.00 (-0.01; -0.00) | 3.0×10 <sup>-7</sup>  | <0.001    | 23           | IWV      |             |
|                   |             | Glucose (mmol/l)                | -0.03 (-0.04; -0.02) | 7.5×10 <sup>-8</sup>  | 0.139     | 34           | MR Egger |             |
|                   |             | Glycated haemoglobin (mmol/mol) | -0.04 (-0.09; -0.00) | 4.2×10 <sup>-2</sup>  | 0.003     | 33           | MR Egger |             |
|                   |             | T2DM (OR)                       | 1.01 (0.99; 1.02)    | 4.7×10 <sup>-1</sup>  | 0.072     | 24           | IWV      |             |
|                   |             | BMI (SD)                        | -0.00 (-0.00; 0.00)  | 4.6×10 <sup>-1</sup>  | 0.002     | 25           | IWV      |             |
|                   |             | SBP (mmHg)                      | 0.17 (0.07; 0.27)    | 1.0×10 <sup>-3</sup>  | 0.035     | 23           | MR Egger |             |
|                   |             | DBP (mmHg)                      | 0.14 (0.09; 0.20)    | 5.3×10 <sup>-7</sup>  | 0.460     | 24           | MR Egger |             |
|                   |             | ECG heart rate (exercise) (BPM) | 0.41 (0.26; 0.55)    | 5.3×10 <sup>-8</sup>  | 0.046     | 32           | IWV      |             |
|                   |             | ECG load (exercise) (Watts)     | -0.06 (-0.41; 0.28)  | 7.2×10 <sup>-1</sup>  | 0.064     | 32           | MR Egger |             |
|                   |             | Asthma (OR)                     | 0.98 (0.97; 0.99)    | 4.4×10 <sup>-5</sup>  | 0.026     | 31           | IWV      |             |
|                   |             | CRP (log(mg/L))                 | 0.01 (0.00; 0.02)    | 2.7×10 <sup>-2</sup>  | 0.143     | 25           | IWV      |             |
|                   |             | eGFR (SD of log(eGFR))          | 0.00 (0.00; 0.00)    | 1.2×10 <sup>-2</sup>  | 0.013     | 25           | MR Egger |             |
|                   |             | BUN (mg/dl)                     | 0.00 (-0.00; 0.00)   | 3.9×10 <sup>-1</sup>  | 0.159     | 27           | MR Egger |             |
|                   |             | CKD (OR)                        | 1.05 (1.03; 1.07)    | 2.0×10 <sup>-7</sup>  | 0.167     | 27           | IWV      |             |
|                   |             | Alzheimer's (OR)                | 1.00 (0.99; 1.00)    | 3.2×10 <sup>-1</sup>  | 0.110     | 27           | IWV      |             |
|                   |             | Parkinson's (OR)                | 1.03 (0.99; 1.06)    | 1.2×10 <sup>-1</sup>  | <0.001    | 22           | IWV      |             |
|                   |             | Lewy body dementia (OR)         | 0.82 (0.77; 0.89)    | 3.6×10 <sup>-7</sup>  | 0.101     | 27           | IWV      |             |
|                   |             | Breast cancer (OR)              | 1.05 (1.02; 1.09)    | 3.4×10 <sup>-3</sup>  | <0.001    | 19           | IWV      |             |
|                   |             | Lung cancer (OR)                | 0.96 (0.91; 1.02)    | 1.9×10 <sup>-1</sup>  | <0.001    | 27           | IWV      |             |
|                   |             | Colon cancer (OR)               | 0.98 (0.91; 1.06)    | 6.7×10 <sup>-1</sup>  | 0.046     | 28           | MR Egger |             |
|                   |             | Prostate cancer (OR)            | 1.05 (1.01; 1.10)    | 2.5×10 <sup>-2</sup>  | 0.517     | 29           | MR Egger |             |
| PTGDS (P41222)    | Drugged     | HF (OR)                         | 1.09 (1.02; 1.17)    | 1.6×10 <sup>-2</sup>  | 0.816     | 4            | IWV      | Interval    |
|                   |             | Non-ischemic CM (OR)            | 1.30 (1.09; 1.55)    | 4.2×10 <sup>-3</sup>  | 0.691     | 5            | IWV      |             |
|                   |             | DCM (OR)                        | 0.96 (0.75; 1.24)    | 7.8×10 <sup>-1</sup>  | 0.681     | 5            | IWV      |             |
|                   |             | AF (OR)                         | 0.96 (0.90; 1.02)    | 1.5×10 <sup>-1</sup>  | 0.370     | 5            | IWV      |             |
|                   |             | CHD (OR)                        | 1.07 (1.01; 1.12)    | 1.3×10 <sup>-2</sup>  | 0.648     | 5            | IWV      |             |
|                   |             | clMT (mm)                       | -0.00 (-0.01; 0.00)  | 5.2×10 <sup>-1</sup>  | 0.886     | 5            | IWV      |             |
|                   |             | Carotid plaque (OR)             | 0.98 (0.86; 1.11)    | 7.2×10 <sup>-1</sup>  | 0.827     | 5            | IWV      |             |
|                   |             | Any stroke (OR)                 | 0.92 (0.86; 0.99)    | 2.0×10 <sup>-2</sup>  | 0.739     | 5            | IWV      |             |
|                   |             | Any ischemic stroke (OR)        | 0.96 (0.89; 1.03)    | 2.7×10 <sup>-1</sup>  | 0.310     | 5            | IWV      |             |
|                   |             | LDL cholesterol (mmol/l)        | -0.01 (-0.02; 0.01)  | 4.8×10 <sup>-1</sup>  | 0.588     | 4            | IWV      |             |
|                   |             | Apolipoprotein B (g/l)          | -0.00 (-0.00; 0.00)  | 8.7×10 <sup>-1</sup>  | 0.790     | 4            | IWV      |             |
|                   |             | Triglycerides (mmol/l)          | -0.01 (-0.03; 0.01)  | 1.9×10 <sup>-1</sup>  | 0.555     | 4            | IWV      |             |
|                   |             | Cholesterol (mmol/l)            | -0.00 (-0.02; 0.02)  | 8.8×10 <sup>-1</sup>  | 0.403     | 4            | IWV      |             |
|                   |             | HDL cholesterol (mmol/l)        | 0.01 (0.00; 0.02)    | 3.3×10 <sup>-3</sup>  | 0.558     | 4            | IWV      |             |
|                   |             | Apolipoprotein A1 (g/l)         | 0.01 (0.00; 0.01)    | 4.9×10 <sup>-4</sup>  | 0.940     | 4            | IWV      |             |
|                   |             | Glucose (mmol/l)                | -0.00 (-0.02; 0.02)  | 8.3×10 <sup>-1</sup>  | 0.756     | 4            | IWV      |             |
|                   |             | Glycated haemoglobin (mmol/mol) | 0.08 (-0.03; 0.19)   | 1.5×10 <sup>-1</sup>  | 0.841     | 4            | IWV      |             |
|                   |             | T2DM (OR)                       | 1.02 (0.99; 1.06)    | 1.8×10 <sup>-1</sup>  | 0.646     | 5            | IWV      |             |
|                   |             | BMI (SD)                        | 0.00 (-0.01; 0.02)   | 5.4×10 <sup>-1</sup>  | 0.070     | 5            | IWV      |             |
|                   |             | SBP (mmHg)                      | 1.29 (0.61; 1.97)    | 2.0×10 <sup>-4</sup>  | 0.055     | 2            | IWV      |             |
|                   |             | DBP (mmHg)                      | 0.61 (0.24; 0.99)    | 1.4×10 <sup>-3</sup>  | 0.064     | 2            | IWV      |             |
|                   |             | ECG heart rate (exercise) (BPM) | -3.18 (-6.68; 0.32)  | 7.5×10 <sup>-2</sup>  | 0.104     | 5            | MR Egger |             |
|                   |             | ECG load (exercise) (Watts)     | 0.23 (-0.48; 0.93)   | 5.3×10 <sup>-1</sup>  | 0.613     | 4            | IWV      |             |
|                   |             | Asthma (OR)                     | 1.01 (0.98; 1.03)    | 6.3×10 <sup>-1</sup>  | 0.367     | 6            | IWV      |             |
|                   |             | CRP (log(mg/L))                 | -0.02 (-0.04; 0.01)  | 2.1×10 <sup>-1</sup>  | 0.863     | 5            | IWV      |             |
|                   |             | eGFR (SD of log(eGFR))          | 0.01 (0.00; 0.02)    | 9.6×10 <sup>-3</sup>  | 0.309     | 5            | MR Egger |             |
|                   |             | BUN (mg/dl)                     | 0.01 (0.01; 0.02)    | 2.9×10 <sup>-5</sup>  | 0.317     | 5            | IWV      |             |
|                   |             | CKD (OR)                        | 0.73 (0.57; 0.95)    | 1.7×10 <sup>-2</sup>  | 0.514     | 5            | MR Egger |             |
|                   |             | Alzheimer's (OR)                | 0.99 (0.97; 1.01)    | 4.0×10 <sup>-1</sup>  | 0.774     | 5            | IWV      |             |
|                   |             | Parkinson's (OR)                | 1.10 (1.00; 1.22)    | 4.5×10 <sup>-2</sup>  | 0.469     | 5            | IWV      |             |
|                   |             | Lewy body dementia (OR)         | 1.19 (0.98; 1.45)    | 8.1×10 <sup>-2</sup>  | 0.890     | 5            | IWV      |             |
|                   |             | Breast cancer (OR)              | 1.01 (0.94; 1.08)    | 8.6×10 <sup>-1</sup>  | 0.606     | 4            | IWV      |             |
|                   |             | Lung cancer (OR)                | 1.04 (0.86; 1.26)    | 6.6×10 <sup>-1</sup>  | 0.594     | 4            | IWV      |             |
|                   |             | Colon cancer (OR)               | 0.82 (0.71; 0.95)    | 8.1×10 <sup>-3</sup>  | 0.030     | 4            | IWV      |             |
|                   |             | Prostate cancer (OR)            | 0.95 (0.87; 1.05)    | 3.2×10 <sup>-1</sup>  | 0.978     | 4            | IWV      |             |
| RENI (P00797)     | Drugged     | HF (OR)                         | 0.97 (0.91; 1.04)    | 4.4×10 <sup>-1</sup>  | 0.306     | 10           | IWV      | Scallop     |
|                   |             | Non-ischemic CM (OR)            | 0.84 (0.65; 1.07)    | 1.6×10 <sup>-1</sup>  | 0.961     | 11           | IWV      |             |
|                   |             | DCM (OR)                        | 0.54 (0.36; 0.79)    | 1.6×10 <sup>-3</sup>  | 0.735     | 10           | IWV      |             |
|                   |             | AF (OR)                         | 0.90 (0.75; 1.07)    | 2.3×10 <sup>-1</sup>  | 0.251     | 12           | MR Egger |             |
|                   |             | CHD (OR)                        | 1.06 (1.00; 1.11)    | 4.2×10 <sup>-2</sup>  | 0.791     | 13           | IWV      |             |
|                   |             | clMT (mm)                       | -0.00 (-0.01; 0.00)  | 7.7×10 <sup>-1</sup>  | 0.953     | 11           | IWV      |             |
|                   |             | Carotid plaque (OR)             | 0.88 (0.74; 1.04)    | 1.4×10 <sup>-1</sup>  | 0.864     | 10           | IWV      |             |

**Table S16:** Phenome-wide drug target MR scan of proteins with a prioritized CMR association. (*continued*)

| Protein (uniprot) | Protein set | Trait                           | Estimate (95%CI)     | P-value                | Q p-value | No. Variants | MR model | PQTL source |
|-------------------|-------------|---------------------------------|----------------------|------------------------|-----------|--------------|----------|-------------|
|                   |             | Any stroke (OR)                 | 1.15 (1.05; 1.25)    | 3.1×10 <sup>-3</sup>   | 0.127     | 11           | IWV      |             |
|                   |             | Any ischemic stroke (OR)        | 1.12 (1.03; 1.22)    | 5.6×10 <sup>-3</sup>   | 0.706     | 11           | IWV      |             |
|                   |             | LDL cholesterol (mmol/l)        | -0.01 (-0.05; 0.04)  | 8.0×10 <sup>-1</sup>   | 0.009     | 11           | MR Egger |             |
|                   |             | Apolipoprotein B (g/l)          | -0.00 (-0.01; 0.01)  | 5.8×10 <sup>-1</sup>   | 0.006     | 11           | MR Egger |             |
|                   |             | Triglycerides (mmol/l)          | -0.01 (-0.03; 0.00)  | 1.7×10 <sup>-1</sup>   | 0.372     | 12           | IWV      |             |
|                   |             | Cholesterol (mmol/l)            | -0.01 (-0.06; 0.04)  | 7.2×10 <sup>-1</sup>   | 0.004     | 11           | MR Egger |             |
|                   |             | HDL cholesterol (mmol/l)        | -0.00 (-0.02; 0.01)  | 6.1×10 <sup>-1</sup>   | 0.312     | 11           | MR Egger |             |
|                   |             | Apolipoprotein A1 (g/l)         | 0.00 (-0.00; 0.01)   | 7.4×10 <sup>-1</sup>   | 0.117     | 12           | IWV      |             |
|                   |             | Glucose (mmol/l)                | -0.04 (-0.11; 0.02)  | 1.7×10 <sup>-1</sup>   | 0.244     | 12           | MR Egger |             |
|                   |             | Glycated haemoglobin (mmol/mol) | -0.00 (-0.12; 0.11)  | 9.4×10 <sup>-1</sup>   | 0.275     | 12           | IWV      |             |
|                   |             | T2DM (OR)                       | 0.97 (0.92; 1.03)    | 3.1×10 <sup>-1</sup>   | 0.192     | 11           | IWV      |             |
|                   |             | BMI (SD)                        | 0.01 (-0.03; 0.06)   | 5.7×10 <sup>-1</sup>   | 0.236     | 10           | MR Egger |             |
|                   |             | SBP (mmHg)                      | -0.43 (-0.73; -0.13) | 4.5×10 <sup>-3</sup>   | <0.001    | 8            | IWV      |             |
|                   |             | DBP (mmHg)                      | -0.05 (-0.23; 0.12)  | 5.3×10 <sup>-1</sup>   | <0.001    | 6            | IWV      |             |
|                   |             | ECG heart rate (exercise) (BPM) | 0.50 (-0.07; 1.08)   | 8.8×10 <sup>-2</sup>   | 0.624     | 12           | IWV      |             |
|                   |             | ECG load (exercise) (Watts)     | 1.30 (0.65; 1.94)    | 8.6×10 <sup>-5</sup>   | 0.622     | 12           | IWV      |             |
|                   |             | Asthma (OR)                     | 0.96 (0.85; 1.07)    | 4.4×10 <sup>-1</sup>   | 0.561     | 12           | MR Egger |             |
|                   |             | CRP (log(mg/L))                 | 0.05 (0.02; 0.09)    | 1.9×10 <sup>-3</sup>   | 0.483     | 11           | IWV      |             |
|                   |             | eGFR (SD of log(eGFR))          | -0.00 (-0.01; 0.00)  | 3.4×10 <sup>-1</sup>   | 0.188     | 11           | MR Egger |             |
|                   |             | BUN (mg/dl)                     | 0.03 (0.02; 0.04)    | 5.8×10 <sup>-12</sup>  | 0.133     | 10           | IWV      |             |
|                   |             | CKD (OR)                        | 1.12 (1.04; 1.20)    | 1.9×10 <sup>-3</sup>   | 0.331     | 11           | IWV      |             |
|                   |             | Alzheimer's (OR)                | 1.03 (1.01; 1.04)    | 3.9×10 <sup>-4</sup>   | 0.905     | 11           | IWV      |             |
|                   |             | Parkinson's (OR)                | 0.90 (0.76; 1.06)    | 2.1×10 <sup>-1</sup>   | 0.563     | 11           | IWV      |             |
|                   |             | Lewy body dementia (OR)         | 0.66 (0.47; 0.92)    | 1.5×10 <sup>-2</sup>   | 0.976     | 11           | IWV      |             |
|                   |             | Breast cancer (OR)              | 1.06 (0.97; 1.15)    | 1.9×10 <sup>-1</sup>   | 0.315     | 12           | IWV      |             |
|                   |             | Lung cancer (OR)                | 1.01 (0.55; 1.83)    | 9.8×10 <sup>-1</sup>   | 0.736     | 12           | MR Egger |             |
|                   |             | Colon cancer (OR)               | 0.84 (0.68; 1.04)    | 1.1×10 <sup>-1</sup>   | 0.038     | 11           | IWV      |             |
|                   |             | Prostate cancer (OR)            | 0.95 (0.85; 1.06)    | 3.5×10 <sup>-1</sup>   | 0.335     | 12           | IWV      |             |
| SLAF7 (Q9NQ25)    | Drugged     | HF (OR)                         | 1.07 (1.05; 1.08)    | 2.2×10 <sup>-13</sup>  | 0.215     | 23           | MR Egger | Interval    |
|                   |             | Non-ischemic CM (OR)            | 1.01 (0.96; 1.07)    | 6.6×10 <sup>-1</sup>   | 0.065     | 21           | IWV      |             |
|                   |             | DCM (OR)                        | 1.12 (1.05; 1.19)    | 3.8×10 <sup>-4</sup>   | 0.063     | 20           | IWV      |             |
|                   |             | AF (OR)                         | 0.99 (0.99; 1.00)    | 5.9×10 <sup>-3</sup>   | 0.026     | 27           | IWV      |             |
|                   |             | CHD (OR)                        | 1.02 (1.01; 1.03)    | 7.0×10 <sup>-4</sup>   | 0.024     | 23           | IWV      |             |
|                   |             | clMT (mm)                       | -0.00 (-0.00; -0.00) | 2.1×10 <sup>-7</sup>   | 0.013     | 23           | IWV      |             |
|                   |             | Carotid plaque (OR)             | 0.95 (0.92; 0.99)    | 1.2×10 <sup>-2</sup>   | 0.030     | 23           | MR Egger |             |
|                   |             | Any stroke (OR)                 | 1.04 (1.01; 1.06)    | 1.7×10 <sup>-3</sup>   | 0.038     | 19           | MR Egger |             |
|                   |             | Any ischemic stroke (OR)        | 1.00 (0.99; 1.01)    | 6.7×10 <sup>-1</sup>   | 0.004     | 21           | IWV      |             |
|                   |             | LDL cholesterol (mmol/l)        | 0.01 (0.00; 0.01)    | 1.5×10 <sup>-9</sup>   | 0.675     | 25           | IWV      |             |
|                   |             | Apolipoprotein B (g/l)          | 0.00 (0.00; 0.00)    | 1.4×10 <sup>-11</sup>  | 0.201     | 24           | IWV      |             |
|                   |             | Triglycerides (mmol/l)          | 0.01 (0.00; 0.01)    | 5.3×10 <sup>-3</sup>   | 0.010     | 26           | MR Egger |             |
|                   |             | Cholesterol (mmol/l)            | 0.01 (0.00; 0.01)    | 7.4×10 <sup>-9</sup>   | 0.082     | 27           | IWV      |             |
|                   |             | HDL cholesterol (mmol/l)        | -0.00 (-0.00; 0.00)  | 9.1×10 <sup>-2</sup>   | 0.124     | 28           | MR Egger |             |
|                   |             | Apolipoprotein A1 (g/l)         | -0.00 (-0.00; -0.00) | 1.9×10 <sup>-2</sup>   | 0.145     | 26           | MR Egger |             |
|                   |             | Glucose (mmol/l)                | -0.01 (-0.01; -0.00) | 2.2×10 <sup>-3</sup>   | 0.025     | 25           | IWV      |             |
|                   |             | Glycated haemoglobin (mmol/mol) | 0.02 (0.00; 0.03)    | 3.2×10 <sup>-2</sup>   | 0.208     | 26           | IWV      |             |
|                   |             | T2DM (OR)                       | 0.99 (0.99; 1.00)    | 1.3×10 <sup>-2</sup>   | 0.047     | 22           | IWV      |             |
|                   |             | BMI (SD)                        | 0.00 (0.00; 0.00)    | 1.5×10 <sup>-2</sup>   | 0.043     | 21           | IWV      |             |
|                   |             | SBP (mmHg)                      | -0.02 (-0.08; 0.04)  | 4.3×10 <sup>-1</sup>   | 0.554     | 20           | MR Egger |             |
|                   |             | DBP (mmHg)                      | 0.01 (-0.01; 0.04)   | 3.8×10 <sup>-1</sup>   | 0.052     | 17           | IWV      |             |
|                   |             | ECG heart rate (exercise) (BPM) | 0.00 (-0.09; 0.09)   | 9.8×10 <sup>-1</sup>   | <0.001    | 25           | IWV      |             |
|                   |             | ECG load (exercise) (Watts)     | 0.51 (0.41; 0.60)    | 1.0×10 <sup>-100</sup> | 0.002     | 27           | IWV      |             |
|                   |             | Asthma (OR)                     | 1.01 (1.00; 1.01)    | 9.7×10 <sup>-3</sup>   | 0.008     | 27           | IWV      |             |
|                   |             | CRP (log(mg/L))                 | 0.01 (-0.01; 0.02)   | 2.6×10 <sup>-1</sup>   | 0.008     | 15           | MR Egger |             |
|                   |             | eGFR (SD of log(eGFR))          | -0.00 (-0.00; -0.00) | 3.5×10 <sup>-3</sup>   | 0.342     | 19           | MR Egger |             |
|                   |             | BUN (mg/dl)                     | -0.00 (-0.00; 0.00)  | 7.2×10 <sup>-1</sup>   | 0.122     | 20           | IWV      |             |
|                   |             | CKD (OR)                        | 1.02 (0.99; 1.05)    | 2.6×10 <sup>-1</sup>   | 0.332     | 21           | MR Egger |             |
|                   |             | Alzheimer's (OR)                | 0.99 (0.99; 1.00)    | 9.0×10 <sup>-7</sup>   | 0.150     | 24           | IWV      |             |
|                   |             | Parkinson's (OR)                | 1.02 (0.98; 1.07)    | 3.0×10 <sup>-1</sup>   | 0.474     | 23           | MR Egger |             |
|                   |             | Lewy body dementia (OR)         | 1.20 (1.09; 1.33)    | 2.7×10 <sup>-4</sup>   | 0.216     | 25           | MR Egger |             |
|                   |             | Breast cancer (OR)              | 1.02 (0.99; 1.05)    | 1.2×10 <sup>-1</sup>   | 0.005     | 27           | MR Egger |             |
|                   |             | Lung cancer (OR)                | 0.99 (0.89; 1.10)    | 8.1×10 <sup>-1</sup>   | 0.003     | 25           | MR Egger |             |
|                   |             | Colon cancer (OR)               | 0.99 (0.97; 1.02)    | 6.5×10 <sup>-1</sup>   | <0.001    | 24           | IWV      |             |
|                   |             | Prostate cancer (OR)            | 1.03 (1.02; 1.04)    | 2.8×10 <sup>-6</sup>   | 0.036     | 28           | IWV      |             |
| TIE2 (Q02763)     | Drugged     | HF (OR)                         | 0.98 (0.96; 0.99)    | 2.4×10 <sup>-3</sup>   | 0.002     | 55           | IWV      | Scallop     |
|                   |             | Non-ischemic CM (OR)            | 1.28 (1.12; 1.46)    | 2.4×10 <sup>-4</sup>   | <0.001    | 50           | MR Egger |             |
|                   |             | DCM (OR)                        | 1.16 (1.01; 1.33)    | 3.3×10 <sup>-2</sup>   | 0.019     | 55           | MR Egger |             |

**Table S16:** Phenome-wide drug target MR scan of proteins with a prioritized CMR association. (*continued*)

| Protein (uniprot) | Protein set | Trait                           | Estimate (95%CI)     | P-value                | Q p-value | No. Variants | MR model | PQTL source |
|-------------------|-------------|---------------------------------|----------------------|------------------------|-----------|--------------|----------|-------------|
|                   |             | AF (OR)                         | 1.03 (1.00; 1.05)    | 2.7×10 <sup>-2</sup>   | <0.001    | 53           | MR Egger |             |
|                   |             | CHD (OR)                        | 1.10 (1.06; 1.15)    | 9.9×10 <sup>-6</sup>   | <0.001    | 40           | MR Egger |             |
|                   |             | clMT (mm)                       | -0.01 (-0.01; -0.00) | 9.0×10 <sup>-5</sup>   | <0.001    | 48           | MR Egger |             |
|                   |             | Carotid plaque (OR)             | 1.14 (1.07; 1.21)    | 8.5×10 <sup>-5</sup>   | <0.001    | 52           | MR Egger |             |
|                   |             | Any stroke (OR)                 | 1.04 (1.02; 1.07)    | 5.0×10 <sup>-4</sup>   | 0.052     | 49           | IWV      |             |
|                   |             | Any ischemic stroke (OR)        | 1.03 (1.01; 1.05)    | 1.5×10 <sup>-2</sup>   | <0.001    | 45           | IWV      |             |
|                   |             | LDL cholesterol (mmol/l)        | 0.00 (-0.00; 0.01)   | 1.6×10 <sup>-1</sup>   | <0.001    | 52           | IWV      |             |
|                   |             | Apolipoprotein B (g/l)          | -0.00 (-0.00; 0.00)  | 1.3×10 <sup>-1</sup>   | 0.004     | 51           | MR Egger |             |
|                   |             | Triglycerides (mmol/l)          | -0.00 (-0.01; 0.01)  | 6.6×10 <sup>-1</sup>   | <0.001    | 44           | MR Egger |             |
|                   |             | Cholesterol (mmol/l)            | -0.01 (-0.02; -0.01) | 5.3×10 <sup>-5</sup>   | <0.001    | 53           | MR Egger |             |
|                   |             | HDL cholesterol (mmol/l)        | -0.01 (-0.01; -0.01) | 1.0×10 <sup>-100</sup> | 0.017     | 48           | MR Egger |             |
|                   |             | Apolipoprotein A1 (g/l)         | -0.01 (-0.01; -0.00) | 3.1×10 <sup>-11</sup>  | <0.001    | 49           | MR Egger |             |
|                   |             | Glucose (mmol/l)                | 0.00 (-0.00; 0.01)   | 1.3×10 <sup>-1</sup>   | <0.001    | 43           | IWV      |             |
|                   |             | Glycated haemoglobin (mmol/mol) | 0.13 (0.09; 0.18)    | 1.6×10 <sup>-8</sup>   | <0.001    | 48           | MR Egger |             |
|                   |             | T2DM (OR)                       | 1.01 (0.99; 1.02)    | 4.4×10 <sup>-1</sup>   | <0.001    | 47           | IWV      |             |
|                   |             | BMI (SD)                        | 0.00 (-0.01; 0.01)   | 5.4×10 <sup>-1</sup>   | <0.001    | 47           | MR Egger |             |
|                   |             | SBP (mmHg)                      | 0.16 (0.09; 0.24)    | 3.3×10 <sup>-5</sup>   | <0.001    | 48           | IWV      |             |
|                   |             | DBP (mmHg)                      | 0.15 (0.08; 0.21)    | 1.6×10 <sup>-5</sup>   | 0.069     | 41           | IWV      |             |
|                   |             | ECG heart rate (exercise) (BPM) | -0.37 (-0.51; -0.23) | 1.9×10 <sup>-7</sup>   | <0.001    | 51           | IWV      |             |
|                   |             | ECG load (exercise) (Watts)     | -0.39 (-0.55; -0.23) | 2.3×10 <sup>-6</sup>   | 0.108     | 55           | IWV      |             |
|                   |             | Asthma (OR)                     | None                 | None                   | None      | None         | None     |             |
|                   |             | CRP (log(mg/L))                 | -0.02 (-0.03; -0.01) | 6.9×10 <sup>-4</sup>   | 0.196     | 54           | IWV      |             |
|                   |             | eGFR (SD of log(eGFR))          | 0.00 (-0.00; 0.00)   | 2.0×10 <sup>-1</sup>   | 0.015     | 52           | IWV      |             |
|                   |             | BUN (mg/dl)                     | -0.00 (-0.01; 0.00)  | 3.0×10 <sup>-1</sup>   | 0.153     | 51           | MR Egger |             |
|                   |             | CKD (OR)                        | 0.97 (0.94; 1.01)    | 1.2×10 <sup>-1</sup>   | <0.001    | 50           | MR Egger |             |
|                   |             | Alzheimer's (OR)                | 1.00 (0.99; 1.01)    | 8.1×10 <sup>-1</sup>   | <0.001    | 44           | MR Egger |             |
|                   |             | Parkinson's (OR)                | 1.05 (0.99; 1.11)    | 8.8×10 <sup>-2</sup>   | 0.007     | 45           | IWV      |             |
|                   |             | Lewy body dementia (OR)         | 0.89 (0.81; 0.97)    | 9.9×10 <sup>-3</sup>   | <0.001    | 41           | IWV      |             |
|                   |             | Breast cancer (OR)              | 1.08 (1.03; 1.12)    | 3.9×10 <sup>-4</sup>   | 0.376     | 50           | MR Egger |             |
|                   |             | Lung cancer (OR)                | 0.89 (0.83; 0.95)    | 6.5×10 <sup>-4</sup>   | 0.336     | 49           | IWV      |             |
|                   |             | Colon cancer (OR)               | 0.82 (0.79; 0.86)    | 1.0×10 <sup>-100</sup> | 0.069     | 49           | IWV      |             |
|                   |             | Prostate cancer (OR)            | 0.99 (0.97; 1.02)    | 6.4×10 <sup>-1</sup>   | 0.033     | 50           | IWV      |             |
| VGFR3 (P35916)    | Drugged     | HF (OR)                         | 1.03 (0.91; 1.17)    | 6.0×10 <sup>-1</sup>   | 0.078     | 18           | MR Egger | Interval    |
|                   |             | Non-ischemic CM (OR)            | 1.34 (0.88; 2.04)    | 1.8×10 <sup>-1</sup>   | 0.621     | 18           | MR Egger |             |
|                   |             | DCM (OR)                        | 0.91 (0.78; 1.06)    | 2.1×10 <sup>-1</sup>   | 0.374     | 18           | IWV      |             |
|                   |             | AF (OR)                         | 1.04 (1.01; 1.06)    | 3.0×10 <sup>-3</sup>   | 0.824     | 18           | IWV      |             |
|                   |             | CHD (OR)                        | 1.00 (0.96; 1.03)    | 8.2×10 <sup>-1</sup>   | 0.804     | 16           | IWV      |             |
|                   |             | clMT (mm)                       | -0.01 (-0.03; -0.00) | 1.1×10 <sup>-2</sup>   | 0.956     | 18           | MR Egger |             |
|                   |             | Carotid plaque (OR)             | 0.88 (0.80; 0.96)    | 3.9×10 <sup>-3</sup>   | 0.234     | 14           | IWV      |             |
|                   |             | Any stroke (OR)                 | 1.00 (0.94; 1.05)    | 9.5×10 <sup>-1</sup>   | 0.083     | 15           | IWV      |             |
|                   |             | Any ischemic stroke (OR)        | 1.02 (0.97; 1.07)    | 4.3×10 <sup>-1</sup>   | 0.497     | 15           | IWV      |             |
|                   |             | LDL cholesterol (mmol/l)        | 0.00 (-0.01; 0.01)   | 9.3×10 <sup>-1</sup>   | 0.008     | 17           | IWV      |             |
|                   |             | Apolipoprotein B (g/l)          | 0.00 (-0.00; 0.00)   | 9.2×10 <sup>-1</sup>   | 0.009     | 17           | IWV      |             |
|                   |             | Triglycerides (mmol/l)          | 0.00 (-0.01; 0.01)   | 6.8×10 <sup>-1</sup>   | 0.157     | 18           | IWV      |             |
|                   |             | Cholesterol (mmol/l)            | 0.01 (-0.00; 0.02)   | 1.1×10 <sup>-1</sup>   | 0.005     | 18           | IWV      |             |
|                   |             | HDL cholesterol (mmol/l)        | 0.01 (0.00; 0.01)    | 3.4×10 <sup>-5</sup>   | 0.320     | 17           | IWV      |             |
|                   |             | Apolipoprotein A1 (g/l)         | 0.01 (0.00; 0.01)    | 3.1×10 <sup>-8</sup>   | 0.048     | 17           | IWV      |             |
|                   |             | Glucose (mmol/l)                | 0.00 (-0.01; 0.01)   | 4.5×10 <sup>-1</sup>   | 0.015     | 18           | IWV      |             |
|                   |             | Glycated haemoglobin (mmol/mol) | 0.00 (-0.05; 0.05)   | 9.2×10 <sup>-1</sup>   | 0.014     | 18           | IWV      |             |
|                   |             | T2DM (OR)                       | 0.99 (0.97; 1.02)    | 4.9×10 <sup>-1</sup>   | 0.445     | 16           | IWV      |             |
|                   |             | BMI (SD)                        | 0.01 (0.00; 0.02)    | 2.5×10 <sup>-2</sup>   | 0.022     | 15           | IWV      |             |
|                   |             | SBP (mmHg)                      | 0.03 (-0.55; 0.60)   | 9.2×10 <sup>-1</sup>   | 0.018     | 14           | MR Egger |             |
|                   |             | DBP (mmHg)                      | -0.24 (-0.32; -0.17) | 9.9×10 <sup>-10</sup>  | 0.003     | 12           | IWV      |             |
|                   |             | ECG heart rate (exercise) (BPM) | 0.16 (-0.14; 0.45)   | 2.9×10 <sup>-1</sup>   | 0.580     | 18           | IWV      |             |
|                   |             | ECG load (exercise) (Watts)     | -0.66 (-0.99; -0.33) | 8.3×10 <sup>-5</sup>   | 0.586     | 18           | IWV      |             |
|                   |             | Asthma (OR)                     | 0.95 (0.88; 1.03)    | 2.1×10 <sup>-1</sup>   | 0.559     | 20           | MR Egger |             |
|                   |             | CRP (log(mg/L))                 | -0.02 (-0.04; 0.00)  | 5.9×10 <sup>-2</sup>   | 0.443     | 16           | IWV      |             |
|                   |             | eGFR (SD of log(eGFR))          | -0.00 (-0.01; 0.01)  | 8.0×10 <sup>-1</sup>   | 0.108     | 17           | MR Egger |             |
|                   |             | BUN (mg/dl)                     | 0.00 (-0.00; 0.00)   | 1.0×10 <sup>0</sup>    | 0.045     | 15           | IWV      |             |
|                   |             | CKD (OR)                        | 0.87 (0.84; 0.91)    | 2.0×10 <sup>-11</sup>  | 0.042     | 15           | IWV      |             |
|                   |             | Alzheimer's (OR)                | 1.00 (0.99; 1.01)    | 6.2×10 <sup>-1</sup>   | 0.599     | 17           | IWV      |             |
|                   |             | Parkinson's (OR)                | 0.63 (0.48; 0.83)    | 9.7×10 <sup>-4</sup>   | 0.733     | 17           | MR Egger |             |
|                   |             | Lewy body dementia (OR)         | 1.03 (0.88; 1.20)    | 7.2×10 <sup>-1</sup>   | 0.392     | 16           | IWV      |             |
|                   |             | Breast cancer (OR)              | 1.03 (0.98; 1.08)    | 2.8×10 <sup>-1</sup>   | 0.763     | 16           | IWV      |             |
|                   |             | Lung cancer (OR)                | 1.12 (0.97; 1.30)    | 1.3×10 <sup>-1</sup>   | 0.170     | 16           | IWV      |             |
|                   |             | Colon cancer (OR)               | 1.06 (0.94; 1.19)    | 3.8×10 <sup>-1</sup>   | 0.140     | 16           | IWV      |             |

**Table S16:** Phenome-wide drug target MR scan of proteins with a prioritized CMR association. (*continued*)

| Protein (uniprot)    | Protein set       | Trait                           | Estimate (95%CI)     | P-value               | Q p-value | No. variants | MR model | PQTL source |
|----------------------|-------------------|---------------------------------|----------------------|-----------------------|-----------|--------------|----------|-------------|
| CASP8 (Q14790)       | Druggable         | Prostate cancer (OR)            | 0.99 (0.93; 1.06)    | $7.8 \times 10^{-1}$  | 0.034     | 16           | IWV      |             |
|                      |                   | HF (OR)                         | 1.14 (1.01; 1.28)    | $3.1 \times 10^{-2}$  | 0.347     | 7            | IWV      | Scallop     |
|                      |                   | Non-ischemic CM (OR)            | 0.92 (0.67; 1.25)    | $5.9 \times 10^{-1}$  | 0.969     | 7            | IWV      |             |
|                      |                   | DCM (OR)                        | 1.05 (0.64; 1.73)    | $8.5 \times 10^{-1}$  | 0.769     | 7            | IWV      |             |
|                      |                   | AF (OR)                         | 1.02 (0.92; 1.12)    | $7.5 \times 10^{-1}$  | 0.103     | 8            | IWV      |             |
|                      |                   | CHD (OR)                        | 1.13 (1.03; 1.24)    | $1.3 \times 10^{-2}$  | 0.550     | 8            | IWV      |             |
|                      |                   | clMT (mm)                       | -0.00 (-0.01; 0.00)  | $3.6 \times 10^{-1}$  | 0.412     | 7            | IWV      |             |
|                      |                   | Carotid plaque (OR)             | 0.84 (0.68; 1.04)    | $1.0 \times 10^{-1}$  | 0.373     | 7            | IWV      |             |
|                      |                   | Any stroke (OR)                 | 1.02 (0.89; 1.16)    | $8.3 \times 10^{-1}$  | 0.255     | 7            | IWV      |             |
|                      |                   | Any ischemic stroke (OR)        | 1.05 (0.90; 1.22)    | $5.2 \times 10^{-1}$  | 0.243     | 7            | IWV      |             |
|                      |                   | LDL cholesterol (mmol/l)        | 0.00 (-0.02; 0.02)   | $9.5 \times 10^{-1}$  | 0.506     | 8            | IWV      |             |
|                      |                   | Apolipoprotein B (g/l)          | -0.02 (-0.04; -0.00) | $2.4 \times 10^{-2}$  | 0.373     | 8            | MR Egger |             |
|                      |                   | Triglycerides (mmol/l)          | -0.03 (-0.06; 0.01)  | $1.5 \times 10^{-1}$  | 0.440     | 5            | IWV      |             |
|                      |                   | Cholesterol (mmol/l)            | -0.08 (-0.15; -0.00) | $4.1 \times 10^{-2}$  | 0.442     | 8            | MR Egger |             |
|                      |                   | HDL cholesterol (mmol/l)        | -0.00 (-0.01; 0.01)  | $5.6 \times 10^{-1}$  | 0.367     | 8            | IWV      |             |
|                      |                   | Apolipoprotein A1 (g/l)         | 0.00 (-0.00; 0.01)   | $2.2 \times 10^{-1}$  | 0.653     | 8            | IWV      |             |
|                      |                   | Glucose (mmol/l)                | -0.04 (-0.07; -0.01) | $1.3 \times 10^{-2}$  | 0.528     | 8            | IWV      |             |
|                      |                   | Glycated haemoglobin (mmol/mol) | 0.37 (-0.19; 0.93)   | $2.0 \times 10^{-1}$  | 0.138     | 8            | MR Egger |             |
|                      |                   | T2DM (OR)                       | 1.00 (0.93; 1.07)    | $9.7 \times 10^{-1}$  | 0.216     | 7            | IWV      |             |
|                      |                   | BMI (SD)                        | 0.03 (0.01; 0.04)    | $2.3 \times 10^{-3}$  | 0.655     | 7            | IWV      |             |
|                      |                   | SBP (mmHg)                      | -0.42 (-0.70; -0.13) | $4.1 \times 10^{-3}$  | 0.973     | 7            | IWV      |             |
|                      |                   | DBP (mmHg)                      | -0.11 (-0.27; 0.05)  | $1.9 \times 10^{-1}$  | 0.947     | 7            | IWV      |             |
|                      |                   | ECG heart rate (exercise) (BPM) | 0.58 (-0.32; 1.48)   | $2.1 \times 10^{-1}$  | 0.828     | 8            | IWV      |             |
|                      |                   | ECG load (exercise) (Watts)     | -1.08 (-4.17; 2.01)  | $4.9 \times 10^{-1}$  | 0.295     | 8            | MR Egger |             |
|                      |                   | Asthma (OR)                     | 1.15 (1.08; 1.22)    | $5.4 \times 10^{-6}$  | 0.305     | 8            | IWV      |             |
|                      |                   | CRP (log(mg/L))                 | -0.04 (-0.08; 0.01)  | $1.4 \times 10^{-1}$  | 0.155     | 7            | IWV      |             |
|                      |                   | eGFR (SD of log(eGFR))          | -0.00 (-0.00; 0.00)  | $3.9 \times 10^{-1}$  | 0.773     | 8            | IWV      |             |
|                      |                   | BUN (mg/dl)                     | 0.01 (-0.00; 0.01)   | $2.1 \times 10^{-1}$  | 0.685     | 7            | IWV      |             |
|                      |                   | CKD (OR)                        | 1.39 (1.06; 1.83)    | $1.6 \times 10^{-2}$  | 0.400     | 8            | MR Egger |             |
|                      |                   | Alzheimer's (OR)                | 0.96 (0.89; 1.04)    | $3.2 \times 10^{-1}$  | 0.991     | 7            | MR Egger |             |
|                      |                   | Parkinson's (OR)                | 1.03 (0.87; 1.23)    | $7.2 \times 10^{-1}$  | 0.389     | 7            | IWV      |             |
|                      |                   | Lewy body dementia (OR)         | 1.05 (0.60; 1.84)    | $8.5 \times 10^{-1}$  | 0.187     | 6            | IWV      |             |
|                      |                   | Breast cancer (OR)              | 0.61 (0.53; 0.70)    | $1.9 \times 10^{-11}$ | 0.789     | 6            | IWV      |             |
| Lung cancer (OR)     | 0.70 (0.51; 0.95) | $2.3 \times 10^{-2}$            | 0.341                | 9                     | IWV       |              |          |             |
| Colon cancer (OR)    | 0.81 (0.64; 1.03) | $8.1 \times 10^{-2}$            | 0.022                | 9                     | IWV       |              |          |             |
| Prostate cancer (OR) | 0.57 (0.37; 0.86) | $7.6 \times 10^{-3}$            | 0.501                | 9                     | MR Egger  |              |          |             |
| DKK1 (O94907)        | Druggable         | HF (OR)                         | 0.89 (0.83; 0.96)    | $2.6 \times 10^{-3}$  | 0.100     | 10           | IWV      | Scallop     |
|                      |                   | Non-ischemic CM (OR)            | 0.79 (0.56; 1.12)    | $1.8 \times 10^{-1}$  | 0.758     | 8            | IWV      |             |
|                      |                   | DCM (OR)                        | 0.44 (0.30; 0.65)    | $4.7 \times 10^{-5}$  | 0.974     | 8            | IWV      |             |
|                      |                   | AF (OR)                         | 0.86 (0.80; 0.92)    | $2.9 \times 10^{-5}$  | 0.160     | 9            | IWV      |             |
|                      |                   | CHD (OR)                        | 0.92 (0.84; 1.01)    | $7.4 \times 10^{-2}$  | 0.315     | 8            | IWV      |             |
|                      |                   | clMT (mm)                       | -0.01 (-0.02; -0.00) | $2.6 \times 10^{-2}$  | 0.898     | 9            | IWV      |             |
|                      |                   | Carotid plaque (OR)             | 1.17 (0.98; 1.39)    | $7.8 \times 10^{-2}$  | 0.292     | 9            | IWV      |             |
|                      |                   | Any stroke (OR)                 | 0.92 (0.82; 1.02)    | $1.2 \times 10^{-1}$  | 0.171     | 9            | IWV      |             |
|                      |                   | Any ischemic stroke (OR)        | 0.95 (0.85; 1.06)    | $3.5 \times 10^{-1}$  | 0.302     | 9            | IWV      |             |
|                      |                   | LDL cholesterol (mmol/l)        | -0.02 (-0.05; -0.00) | $3.9 \times 10^{-2}$  | 0.989     | 7            | IWV      |             |
|                      |                   | Apolipoprotein B (g/l)          | -0.01 (-0.01; -0.00) | $4.2 \times 10^{-2}$  | 0.955     | 7            | IWV      |             |
|                      |                   | Triglycerides (mmol/l)          | -0.05 (-0.07; -0.02) | $4.4 \times 10^{-4}$  | 0.438     | 7            | IWV      |             |
|                      |                   | Cholesterol (mmol/l)            | -0.03 (-0.06; -0.00) | $3.1 \times 10^{-2}$  | 0.965     | 7            | IWV      |             |
|                      |                   | HDL cholesterol (mmol/l)        | 0.01 (0.00; 0.02)    | $2.3 \times 10^{-2}$  | 0.003     | 7            | IWV      |             |
|                      |                   | Apolipoprotein A1 (g/l)         | 0.03 (0.01; 0.04)    | $6.4 \times 10^{-3}$  | 0.032     | 8            | MR Egger |             |
|                      |                   | Glucose (mmol/l)                | 0.01 (-0.03; 0.04)   | $6.7 \times 10^{-1}$  | 0.850     | 7            | IWV      |             |
|                      |                   | Glycated haemoglobin (mmol/mol) | 0.03 (-0.15; 0.22)   | $7.3 \times 10^{-1}$  | 0.282     | 7            | IWV      |             |
|                      |                   | T2DM (OR)                       | 1.03 (0.96; 1.11)    | $4.5 \times 10^{-1}$  | 0.297     | 8            | IWV      |             |
|                      |                   | BMI (SD)                        | -0.03 (-0.05; -0.01) | $3.1 \times 10^{-3}$  | 0.674     | 8            | IWV      |             |
|                      |                   | SBP (mmHg)                      | -0.14 (-0.46; 0.19)  | $4.1 \times 10^{-1}$  | 0.782     | 8            | IWV      |             |
|                      |                   | DBP (mmHg)                      | 0.17 (-0.38; 0.72)   | $5.5 \times 10^{-1}$  | 0.550     | 8            | MR Egger |             |
|                      |                   | ECG heart rate (exercise) (BPM) | -1.53 (-2.47; -0.58) | $1.6 \times 10^{-3}$  | 0.999     | 7            | IWV      |             |
|                      |                   | ECG load (exercise) (Watts)     | 0.09 (-0.98; 1.15)   | $8.7 \times 10^{-1}$  | 0.752     | 7            | IWV      |             |
|                      |                   | Asthma (OR)                     | 0.98 (0.92; 1.04)    | $4.9 \times 10^{-1}$  | 0.967     | 8            | IWV      |             |
|                      |                   | CRP (log(mg/L))                 | 0.02 (-0.03; 0.06)   | $4.6 \times 10^{-1}$  | 0.651     | 9            | IWV      |             |
|                      |                   | eGFR (SD of log(eGFR))          | -0.00 (-0.00; 0.00)  | $4.3 \times 10^{-1}$  | 0.918     | 8            | IWV      |             |
|                      |                   | BUN (mg/dl)                     | -0.01 (-0.02; 0.01)  | $3.8 \times 10^{-1}$  | 0.197     | 8            | IWV      |             |
|                      |                   | CKD (OR)                        | 0.96 (0.86; 1.08)    | $5.2 \times 10^{-1}$  | 0.312     | 8            | IWV      |             |
|                      |                   | Alzheimer's (OR)                | 0.98 (0.95; 1.01)    | $1.1 \times 10^{-1}$  | 0.282     | 9            | IWV      |             |
|                      |                   | Parkinson's (OR)                | 1.04 (0.76; 1.43)    | $8.1 \times 10^{-1}$  | 0.111     | 8            | IWV      |             |

**Table S16:** Phenome-wide drug target MR scan of proteins with a prioritized CMR association. (*continued*)

| Protein (UniProt)               | Protein set          | Trait                           | Estimate (95%CI)     | P-value                | Q p-value | No. Variants | MR model | PQTL source |
|---------------------------------|----------------------|---------------------------------|----------------------|------------------------|-----------|--------------|----------|-------------|
| ERAP1 (Q9NZ08)                  | Druggable            | Lewy body dementia (OR)         | 1.26 (0.83; 1.91)    | 2.9×10 <sup>-1</sup>   | 0.020     | 6            | IVW      |             |
|                                 |                      | Breast cancer (OR)              | 1.14 (1.03; 1.27)    | 1.5×10 <sup>-2</sup>   | 0.806     | 8            | IVW      |             |
|                                 |                      | Lung cancer (OR)                | 0.29 (0.11; 0.75)    | 1.1×10 <sup>-2</sup>   | 0.531     | 8            | MR Egger |             |
|                                 |                      | Colon cancer (OR)               | 1.93 (1.56; 2.41)    | 3.1×10 <sup>-9</sup>   | 0.604     | 8            | IVW      |             |
|                                 |                      | Prostate cancer (OR)            | 1.01 (0.83; 1.24)    | 8.9×10 <sup>-1</sup>   | 0.058     | 7            | IVW      |             |
|                                 | Druggable            | HF (OR)                         | 0.99 (0.99; 0.99)    | 5.7×10 <sup>-5</sup>   | <0.001    | 33           | IVW      | Interval    |
|                                 |                      | Non-ischemic CM (OR)            | 1.10 (1.07; 1.13)    | 3.1×10 <sup>-12</sup>  | <0.001    | 35           | IVW      |             |
|                                 |                      | DCM (OR)                        | 1.03 (1.01; 1.05)    | 1.0×10 <sup>-2</sup>   | 0.066     | 48           | IVW      |             |
|                                 |                      | AF (OR)                         | 0.99 (0.98; 0.99)    | 1.5×10 <sup>-11</sup>  | <0.001    | 46           | IVW      |             |
|                                 |                      | CHD (OR)                        | 0.98 (0.97; 0.98)    | 4.4×10 <sup>-16</sup>  | 0.007     | 39           | IVW      |             |
|                                 |                      | clMT (mm)                       | 0.00 (0.00; 0.00)    | 1.7×10 <sup>-11</sup>  | 0.023     | 38           | IVW      |             |
|                                 |                      | Carotid plaque (OR)             | 0.95 (0.94; 0.96)    | 3.8×10 <sup>-11</sup>  | 0.007     | 42           | MR Egger |             |
|                                 |                      | Any stroke (OR)                 | 0.97 (0.96; 0.99)    | 2.0×10 <sup>-4</sup>   | 0.170     | 32           | MR Egger |             |
|                                 |                      | Any ischemic stroke (OR)        | 0.99 (0.97; 1.00)    | 7.9×10 <sup>-2</sup>   | 0.248     | 33           | MR Egger |             |
|                                 |                      | LDL cholesterol (mmol/l)        | 0.00 (-0.00; 0.00)   | 5.6×10 <sup>-1</sup>   | <0.001    | 49           | MR Egger |             |
|                                 |                      | Apolipoprotein B (g/l)          | 0.00 (0.00; 0.00)    | 6.9×10 <sup>-5</sup>   | <0.001    | 48           | IVW      |             |
|                                 |                      | Triglycerides (mmol/l)          | 0.00 (0.00; 0.01)    | 9.9×10 <sup>-9</sup>   | <0.001    | 41           | IVW      |             |
|                                 |                      | Cholesterol (mmol/l)            | 0.00 (-0.00; 0.00)   | 6.6×10 <sup>-1</sup>   | <0.001    | 49           | MR Egger |             |
|                                 |                      | HDL cholesterol (mmol/l)        | 0.00 (-0.00; 0.00)   | 7.3×10 <sup>-1</sup>   | <0.001    | 40           | MR Egger |             |
|                                 |                      | Apolipoprotein A1 (g/l)         | -0.00 (-0.00; -0.00) | 4.3×10 <sup>-5</sup>   | <0.001    | 43           | IVW      |             |
|                                 |                      | Glucose (mmol/l)                | -0.00 (-0.00; 0.00)  | 6.9×10 <sup>-1</sup>   | <0.001    | 48           | IVW      |             |
|                                 |                      | Glycated haemoglobin (mmol/mol) | 0.04 (0.03; 0.05)    | 2.3×10 <sup>-12</sup>  | 0.073     | 46           | IVW      |             |
|                                 |                      | T2DM (OR)                       | 0.97 (0.96; 0.98)    | 1.0×10 <sup>-100</sup> | 0.004     | 39           | MR Egger |             |
|                                 |                      | BMI (SD)                        | -0.01 (-0.01; -0.00) | 1.2×10 <sup>-10</sup>  | <0.001    | 35           | MR Egger |             |
|                                 |                      | SBP (mmHg)                      | -0.17 (-0.20; -0.15) | 1.0×10 <sup>-100</sup> | <0.001    | 25           | IVW      |             |
| DBP (mmHg)                      | -0.15 (-0.17; -0.13) | 1.0×10 <sup>-100</sup>          | <0.001               | 27                     | IVW       |              |          |             |
| ECG heart rate (exercise) (BPM) | 0.27 (0.17; 0.36)    | 7.4×10 <sup>-8</sup>            | 0.008                | 52                     | MR Egger  |              |          |             |
| ECG load (exercise) (Watts)     | 0.27 (0.21; 0.32)    | 1.0×10 <sup>-100</sup>          | <0.001               | 48                     | IVW       |              |          |             |
| Asthma (OR)                     | 1.01 (1.01; 1.02)    | 4.5×10 <sup>-6</sup>            | 0.011                | 57                     | MR Egger  |              |          |             |
| CRP (log(mg/L))                 | 0.00 (-0.00; 0.01)   | 7.4×10 <sup>-2</sup>            | <0.001               | 47                     | MR Egger  |              |          |             |
| eGFR (SD of log(eGFR))          | 0.00 (-0.00; 0.00)   | 3.3×10 <sup>-1</sup>            | 0.053                | 34                     | IVW       |              |          |             |
| BUN (mg/dl)                     | -0.00 (-0.00; 0.00)  | 2.3×10 <sup>-1</sup>            | <0.001               | 38                     | MR Egger  |              |          |             |
| CKD (OR)                        | 1.02 (1.01; 1.04)    | 3.3×10 <sup>-4</sup>            | 0.011                | 40                     | MR Egger  |              |          |             |
| Alzheimer's (OR)                | 1.00 (1.00; 1.00)    | 4.0×10 <sup>-1</sup>            | 0.068                | 43                     | MR Egger  |              |          |             |
| Parkinson's (OR)                | 1.00 (0.99; 1.01)    | 6.5×10 <sup>-1</sup>            | <0.001               | 40                     | IVW       |              |          |             |
| Lewy body dementia (OR)         | 1.09 (1.06; 1.11)    | 7.8×10 <sup>-13</sup>           | 0.014                | 44                     | IVW       |              |          |             |
| Breast cancer (OR)              | 1.05 (1.03; 1.07)    | 9.8×10 <sup>-9</sup>            | <0.001               | 44                     | MR Egger  |              |          |             |
| Lung cancer (OR)                | 1.00 (0.96; 1.04)    | 9.6×10 <sup>-1</sup>            | 0.091                | 44                     | MR Egger  |              |          |             |
| Colon cancer (OR)               | 0.96 (0.94; 0.99)    | 3.6×10 <sup>-3</sup>            | <0.001               | 48                     | MR Egger  |              |          |             |
| Prostate cancer (OR)            | 1.04 (1.03; 1.05)    | 1.0×10 <sup>-100</sup>          | <0.001               | 46                     | IVW       |              |          |             |
| ERAP2 (Q6P179)                  | Druggable            | HF (OR)                         | 0.99 (0.99; 1.00)    | 1.0×10 <sup>-2</sup>   | <0.001    | 32           | IVW      | Interval    |
|                                 |                      | Non-ischemic CM (OR)            | 0.95 (0.92; 0.97)    | 2.4×10 <sup>-4</sup>   | 0.092     | 39           | IVW      |             |
|                                 |                      | DCM (OR)                        | 0.95 (0.90; 0.99)    | 2.9×10 <sup>-2</sup>   | 0.129     | 46           | MR Egger |             |
|                                 |                      | AF (OR)                         | 0.98 (0.97; 0.99)    | 1.5×10 <sup>-3</sup>   | 0.008     | 40           | MR Egger |             |
|                                 |                      | CHD (OR)                        | 1.03 (1.02; 1.03)    | 1.0×10 <sup>-100</sup> | <0.001    | 39           | IVW      |             |
|                                 | Druggable            | clMT (mm)                       | -0.00 (-0.00; -0.00) | 3.8×10 <sup>-2</sup>   | <0.001    | 38           | MR Egger |             |
|                                 |                      | Carotid plaque (OR)             | 1.04 (1.03; 1.06)    | 8.0×10 <sup>-7</sup>   | 0.050     | 39           | MR Egger |             |
|                                 |                      | Any stroke (OR)                 | 1.00 (0.99; 1.01)    | 8.2×10 <sup>-1</sup>   | 0.348     | 44           | MR Egger |             |
|                                 |                      | Any ischemic stroke (OR)        | 0.99 (0.98; 1.00)    | 1.2×10 <sup>-1</sup>   | 0.254     | 44           | MR Egger |             |
|                                 |                      | LDL cholesterol (mmol/l)        | 0.01 (0.00; 0.01)    | 6.6×10 <sup>-7</sup>   | 0.541     | 46           | MR Egger |             |
|                                 |                      | Apolipoprotein B (g/l)          | 0.00 (0.00; 0.00)    | 3.2×10 <sup>-8</sup>   | 0.051     | 46           | MR Egger |             |
|                                 |                      | Triglycerides (mmol/l)          | 0.00 (-0.00; 0.01)   | 9.3×10 <sup>-2</sup>   | <0.001    | 48           | MR Egger |             |
|                                 |                      | Cholesterol (mmol/l)            | 0.01 (0.00; 0.01)    | 3.8×10 <sup>-5</sup>   | 0.211     | 47           | MR Egger |             |
|                                 |                      | HDL cholesterol (mmol/l)        | -0.00 (-0.00; 0.00)  | 4.7×10 <sup>-1</sup>   | <0.001    | 37           | IVW      |             |
|                                 |                      | Apolipoprotein A1 (g/l)         | -0.00 (-0.00; 0.00)  | 8.0×10 <sup>-1</sup>   | <0.001    | 39           | IVW      |             |
|                                 |                      | Glucose (mmol/l)                | -0.01 (-0.01; -0.01) | 1.0×10 <sup>-100</sup> | <0.001    | 45           | IVW      |             |
|                                 |                      | Glycated haemoglobin (mmol/mol) | -0.00 (-0.01; 0.01)  | 7.2×10 <sup>-1</sup>   | <0.001    | 45           | IVW      |             |
|                                 |                      | T2DM (OR)                       | 1.01 (1.01; 1.02)    | 7.5×10 <sup>-5</sup>   | 0.066     | 40           | IVW      |             |
|                                 |                      | BMI (SD)                        | 0.01 (0.01; 0.01)    | 6.1×10 <sup>-6</sup>   | 0.081     | 30           | MR Egger |             |
|                                 |                      | SBP (mmHg)                      | 0.15 (0.07; 0.22)    | 1.5×10 <sup>-4</sup>   | <0.001    | 21           | MR Egger |             |
|                                 |                      | DBP (mmHg)                      | 0.13 (0.10; 0.17)    | 1.6×10 <sup>-14</sup>  | <0.001    | 26           | MR Egger |             |
|                                 |                      | ECG heart rate (exercise) (BPM) | 0.31 (0.22; 0.40)    | 1.2×10 <sup>-12</sup>  | <0.001    | 49           | MR Egger |             |
|                                 |                      | ECG load (exercise) (Watts)     | -0.09 (-0.14; -0.05) | 1.6×10 <sup>-5</sup>   | <0.001    | 51           | IVW      |             |
|                                 |                      | Asthma (OR)                     | 1.00 (0.99; 1.00)    | 2.8×10 <sup>-1</sup>   | 0.032     | 43           | MR Egger |             |
|                                 |                      | CRP (log(mg/L))                 | -0.00 (-0.01; 0.01)  | 9.4×10 <sup>-1</sup>   | 0.002     | 39           | MR Egger |             |
| eGFR (SD of log(eGFR))          | -0.00 (-0.00; -0.00) | 5.7×10 <sup>-9</sup>            | 0.024                | 40                     | IVW       |              |          |             |

**Table S16:** Phenome-wide drug target MR scan of proteins with a prioritized CMR association. (*continued*)

| Protein (uniprot) | Protein set | Trait                           | Estimate (95%CI)     | P-value                | Q p-value | No. Variants | MR model | PQTL source |
|-------------------|-------------|---------------------------------|----------------------|------------------------|-----------|--------------|----------|-------------|
|                   |             | BUN (mg/dl)                     | -0.00 (-0.00; 0.00)  | 8.9×10 <sup>-1</sup>   | 0.476     | 42           | MR Egger |             |
|                   |             | CKD (OR)                        | 0.99 (0.98; 1.00)    | 1.5×10 <sup>-1</sup>   | 0.070     | 43           | MR Egger |             |
|                   |             | Alzheimer's (OR)                | 1.00 (1.00; 1.00)    | 2.9×10 <sup>-2</sup>   | <0.001    | 45           | IWV      |             |
|                   |             | Parkinson's (OR)                | 0.96 (0.94; 0.99)    | 1.7×10 <sup>-3</sup>   | 0.010     | 45           | MR Egger |             |
|                   |             | Lewy body dementia (OR)         | 0.97 (0.96; 0.99)    | 5.7×10 <sup>-4</sup>   | 0.008     | 40           | IWV      |             |
|                   |             | Breast cancer (OR)              | 0.99 (0.99; 1.00)    | 9.6×10 <sup>-2</sup>   | <0.001    | 39           | IWV      |             |
|                   |             | Lung cancer (OR)                | 0.94 (0.93; 0.95)    | 1.0×10 <sup>-100</sup> | 0.026     | 41           | IWV      |             |
|                   |             | Colon cancer (OR)               | 1.02 (0.98; 1.06)    | 2.4×10 <sup>-1</sup>   | 0.756     | 42           | MR Egger |             |
|                   |             | Prostate cancer (OR)            | 0.95 (0.95; 0.96)    | 1.0×10 <sup>-100</sup> | <0.001    | 36           | IWV      |             |
| FCER2 (P06734)    | Druggable   | HF (OR)                         | 0.94 (0.90; 1.00)    | 3.5×10 <sup>-2</sup>   | 0.523     | 22           | MR Egger | Interval    |
|                   |             | Non-ischemic CM (OR)            | 0.93 (0.73; 1.19)    | 5.7×10 <sup>-1</sup>   | 0.043     | 21           | MR Egger |             |
|                   |             | DCM (OR)                        | 1.17 (0.88; 1.55)    | 2.9×10 <sup>-1</sup>   | 0.779     | 21           | MR Egger |             |
|                   |             | AF (OR)                         | 1.03 (1.01; 1.05)    | 8.5×10 <sup>-3</sup>   | 0.207     | 23           | IWV      |             |
|                   |             | CHD (OR)                        | 1.01 (0.96; 1.06)    | 7.1×10 <sup>-1</sup>   | 0.265     | 23           | MR Egger |             |
|                   |             | clMT (mm)                       | 0.00 (-0.00; 0.01)   | 6.9×10 <sup>-1</sup>   | 0.154     | 22           | MR Egger |             |
|                   |             | Carotid plaque (OR)             | 0.96 (0.91; 1.00)    | 5.6×10 <sup>-2</sup>   | 0.007     | 20           | IWV      |             |
|                   |             | Any stroke (OR)                 | 0.96 (0.91; 1.02)    | 1.5×10 <sup>-1</sup>   | 0.710     | 22           | MR Egger |             |
|                   |             | Any ischemic stroke (OR)        | 0.95 (0.88; 1.02)    | 1.6×10 <sup>-1</sup>   | 0.114     | 23           | MR Egger |             |
|                   |             | LDL cholesterol (mmol/l)        | -0.00 (-0.02; 0.01)  | 9.3×10 <sup>-1</sup>   | 0.300     | 25           | MR Egger |             |
|                   |             | Apolipoprotein B (g/l)          | 0.00 (-0.00; 0.00)   | 9.5×10 <sup>-1</sup>   | 0.394     | 25           | MR Egger |             |
|                   |             | Triglycerides (mmol/l)          | -0.00 (-0.02; 0.02)  | 9.8×10 <sup>-1</sup>   | 0.098     | 25           | MR Egger |             |
|                   |             | Cholesterol (mmol/l)            | 0.00 (-0.02; 0.02)   | 9.6×10 <sup>-1</sup>   | 0.332     | 25           | MR Egger |             |
|                   |             | HDL cholesterol (mmol/l)        | 0.00 (-0.01; 0.01)   | 7.4×10 <sup>-1</sup>   | 0.038     | 25           | MR Egger |             |
|                   |             | Apolipoprotein A1 (g/l)         | 0.00 (-0.00; 0.01)   | 2.7×10 <sup>-1</sup>   | 0.250     | 24           | MR Egger |             |
|                   |             | Glucose (mmol/l)                | 0.01 (-0.01; 0.03)   | 2.8×10 <sup>-1</sup>   | 0.776     | 25           | MR Egger |             |
|                   |             | Glycated haemoglobin (mmol/mol) | -0.06 (-0.17; 0.05)  | 3.1×10 <sup>-1</sup>   | 0.344     | 25           | MR Egger |             |
|                   |             | T2DM (OR)                       | 0.99 (0.96; 1.02)    | 5.6×10 <sup>-1</sup>   | 0.075     | 17           | IWV      |             |
|                   |             | BMI (SD)                        | 0.00 (-0.01; 0.01)   | 7.1×10 <sup>-1</sup>   | 0.068     | 20           | IWV      |             |
|                   |             | SBP (mmHg)                      | 0.16 (0.06; 0.25)    | 9.5×10 <sup>-4</sup>   | 0.644     | 19           | IWV      |             |
|                   |             | DBP (mmHg)                      | 0.11 (-0.02; 0.24)   | 1.1×10 <sup>-1</sup>   | 0.221     | 20           | MR Egger |             |
|                   |             | ECG heart rate (exercise) (BPM) | -0.10 (-0.65; 0.44)  | 7.1×10 <sup>-1</sup>   | 0.437     | 26           | MR Egger |             |
|                   |             | ECG load (exercise) (Watts)     | -0.03 (-0.63; 0.58)  | 9.4×10 <sup>-1</sup>   | 0.480     | 26           | MR Egger |             |
|                   |             | Asthma (OR)                     | 0.99 (0.95; 1.04)    | 7.6×10 <sup>-1</sup>   | 0.110     | 25           | MR Egger |             |
|                   |             | CRP (log(mg/L))                 | -0.01 (-0.06; 0.03)  | 5.0×10 <sup>-1</sup>   | 0.548     | 20           | MR Egger |             |
|                   |             | eGFR (SD of log(eGFR))          | 0.00 (-0.00; 0.00)   | 8.2×10 <sup>-1</sup>   | 0.346     | 21           | MR Egger |             |
|                   |             | BUN (mg/dl)                     | -0.01 (-0.01; 0.00)  | 1.8×10 <sup>-1</sup>   | 0.301     | 21           | MR Egger |             |
|                   |             | CKD (OR)                        | 0.94 (0.86; 1.03)    | 2.2×10 <sup>-1</sup>   | 0.104     | 21           | MR Egger |             |
|                   |             | Alzheimer's (OR)                | 0.99 (0.97; 1.00)    | 1.1×10 <sup>-1</sup>   | 0.580     | 22           | MR Egger |             |
|                   |             | Parkinson's (OR)                | 0.84 (0.70; 1.00)    | 4.5×10 <sup>-2</sup>   | 0.736     | 21           | MR Egger |             |
|                   |             | Lewy body dementia (OR)         | 1.00 (0.79; 1.26)    | 9.9×10 <sup>-1</sup>   | 0.797     | 22           | MR Egger |             |
|                   |             | Breast cancer (OR)              | 0.95 (0.92; 0.97)    | 2.6×10 <sup>-4</sup>   | 0.669     | 19           | IWV      |             |
|                   |             | Lung cancer (OR)                | 1.22 (0.90; 1.64)    | 2.0×10 <sup>-1</sup>   | 0.092     | 19           | MR Egger |             |
|                   |             | Colon cancer (OR)               | 1.21 (0.98; 1.48)    | 7.2×10 <sup>-2</sup>   | 0.424     | 19           | MR Egger |             |
|                   |             | Prostate cancer (OR)            | 1.03 (0.97; 1.09)    | 4.1×10 <sup>-1</sup>   | 0.119     | 16           | IWV      |             |
| GFRA1 (P56159)    | Druggable   | HF (OR)                         | 1.03 (0.94; 1.13)    | 5.2×10 <sup>-1</sup>   | 0.618     | 10           | MR Egger | Interval    |
|                   |             | Non-ischemic CM (OR)            | 0.90 (0.55; 1.48)    | 6.7×10 <sup>-1</sup>   | 0.136     | 10           | MR Egger |             |
|                   |             | DCM (OR)                        | 0.99 (0.86; 1.15)    | 9.2×10 <sup>-1</sup>   | <0.001    | 9            | IWV      |             |
|                   |             | AF (OR)                         | 0.96 (0.93; 0.98)    | 9.4×10 <sup>-4</sup>   | 0.622     | 12           | IWV      |             |
|                   |             | CHD (OR)                        | 1.00 (0.91; 1.10)    | 9.6×10 <sup>-1</sup>   | 0.880     | 12           | MR Egger |             |
|                   |             | clMT (mm)                       | -0.00 (-0.01; 0.00)  | 1.9×10 <sup>-1</sup>   | 0.903     | 11           | MR Egger |             |
|                   |             | Carotid plaque (OR)             | 0.86 (0.80; 0.91)    | 8.2×10 <sup>-7</sup>   | <0.001    | 11           | IWV      |             |
|                   |             | Any stroke (OR)                 | 1.02 (0.90; 1.15)    | 7.8×10 <sup>-1</sup>   | 0.268     | 10           | MR Egger |             |
|                   |             | Any ischemic stroke (OR)        | 1.00 (0.96; 1.04)    | 9.0×10 <sup>-1</sup>   | 0.339     | 10           | IWV      |             |
|                   |             | LDL cholesterol (mmol/l)        | -0.00 (-0.01; 0.00)  | 3.3×10 <sup>-1</sup>   | 0.571     | 10           | IWV      |             |
|                   |             | Apolipoprotein B (g/l)          | -0.00 (-0.00; 0.00)  | 4.2×10 <sup>-1</sup>   | 0.477     | 11           | IWV      |             |
|                   |             | Triglycerides (mmol/l)          | -0.01 (-0.02; 0.00)  | 9.1×10 <sup>-2</sup>   | 0.300     | 11           | IWV      |             |
|                   |             | Cholesterol (mmol/l)            | -0.01 (-0.02; 0.00)  | 6.2×10 <sup>-2</sup>   | 0.427     | 11           | IWV      |             |
|                   |             | HDL cholesterol (mmol/l)        | -0.01 (-0.02; 0.00)  | 1.9×10 <sup>-1</sup>   | 0.586     | 10           | MR Egger |             |
|                   |             | Apolipoprotein A1 (g/l)         | -0.00 (-0.00; 0.00)  | 8.0×10 <sup>-1</sup>   | 0.741     | 10           | IWV      |             |
|                   |             | Glucose (mmol/l)                | 0.02 (0.01; 0.03)    | 1.4×10 <sup>-3</sup>   | 0.037     | 10           | IWV      |             |
|                   |             | Glycated haemoglobin (mmol/mol) | 0.04 (-0.02; 0.10)   | 1.7×10 <sup>-1</sup>   | 0.941     | 11           | IWV      |             |
|                   |             | T2DM (OR)                       | 1.01 (0.99; 1.03)    | 4.9×10 <sup>-1</sup>   | 0.467     | 10           | IWV      |             |
|                   |             | BMI (SD)                        | -0.01 (-0.02; -0.00) | 2.3×10 <sup>-3</sup>   | 0.257     | 10           | IWV      |             |
|                   |             | SBP (mmHg)                      | 0.27 (0.16; 0.39)    | 3.4×10 <sup>-6</sup>   | 0.811     | 9            | IWV      |             |
|                   |             | DBP (mmHg)                      | 0.17 (0.11; 0.23)    | 1.4×10 <sup>-7</sup>   | 0.963     | 10           | IWV      |             |
|                   |             | ECG heart rate (exercise) (BPM) | -0.27 (-0.61; 0.07)  | 1.2×10 <sup>-1</sup>   | 0.424     | 11           | IWV      |             |

**Table S16:** Phenome-wide drug target MR scan of proteins with a prioritized CMR association. (*continued*)

| Protein (uniprot) | Protein set | Trait                           | Estimate (95%CI)     | P-value                | Q p-value | No. Variants | MR model | PQTL source |
|-------------------|-------------|---------------------------------|----------------------|------------------------|-----------|--------------|----------|-------------|
|                   |             | ECG load (exercise) (Watts)     | -0.75 (-1.14; -0.35) | 1.9×10 <sup>-4</sup>   | 0.391     | 10           | IVW      |             |
|                   |             | Asthma (OR)                     | 0.96 (0.93; 0.98)    | 2.2×10 <sup>-4</sup>   | 0.489     | 11           | IVW      |             |
|                   |             | CRP (log(mg/L))                 | -0.01 (-0.09; 0.08)  | 8.7×10 <sup>-1</sup>   | 0.047     | 7            | MR Egger |             |
|                   |             | eGFR (SD of log(eGFR))          | -0.00 (-0.01; 0.00)  | 5.4×10 <sup>-1</sup>   | 0.993     | 10           | MR Egger |             |
|                   |             | BUN (mg/dl)                     | -0.00 (-0.01; -0.00) | 9.5×10 <sup>-3</sup>   | 0.511     | 10           | IVW      |             |
|                   |             | CKD (OR)                        | 1.02 (0.99; 1.06)    | 2.4×10 <sup>-1</sup>   | 0.627     | 10           | IVW      |             |
|                   |             | Alzheimer's (OR)                | 1.01 (1.00; 1.02)    | 2.2×10 <sup>-1</sup>   | 0.820     | 9            | IVW      |             |
|                   |             | Parkinson's (OR)                | 1.33 (0.96; 1.85)    | 9.0×10 <sup>-2</sup>   | 0.138     | 10           | MR Egger |             |
|                   |             | Lewy body dementia (OR)         | 1.01 (0.66; 1.53)    | 9.8×10 <sup>-1</sup>   | 0.760     | 11           | MR Egger |             |
|                   |             | Breast cancer (OR)              | 0.97 (0.84; 1.11)    | 6.3×10 <sup>-1</sup>   | 0.261     | 12           | MR Egger |             |
|                   |             | Lung cancer (OR)                | 0.93 (0.83; 1.04)    | 2.1×10 <sup>-1</sup>   | 0.897     | 11           | IVW      |             |
|                   |             | Colon cancer (OR)               | 2.01 (1.42; 2.84)    | 9.0×10 <sup>-5</sup>   | 0.891     | 10           | MR Egger |             |
|                   |             | Prostate cancer (OR)            | 0.87 (0.82; 0.92)    | 2.0×10 <sup>-6</sup>   | 0.803     | 11           | IVW      |             |
| ICOSL (O75144)    | Druggable   | HF (OR)                         | 1.05 (1.00; 1.09)    | 2.8×10 <sup>-2</sup>   | 0.004     | 34           | MR Egger | Interval    |
|                   |             | Non-ischemic CM (OR)            | 1.09 (0.91; 1.30)    | 3.5×10 <sup>-1</sup>   | 0.487     | 31           | MR Egger |             |
|                   |             | DCM (OR)                        | 1.26 (1.20; 1.33)    | 1.0×10 <sup>-100</sup> | 0.049     | 36           | IVW      |             |
|                   |             | AF (OR)                         | 1.08 (1.03; 1.12)    | 1.1×10 <sup>-3</sup>   | 0.473     | 36           | MR Egger |             |
|                   |             | CHD (OR)                        | 1.05 (1.00; 1.09)    | 4.8×10 <sup>-2</sup>   | 0.981     | 33           | MR Egger |             |
|                   |             | clMT (mm)                       | 0.00 (-0.00; 0.00)   | 1.5×10 <sup>-1</sup>   | 0.034     | 33           | IVW      |             |
|                   |             | Carotid plaque (OR)             | 1.12 (1.02; 1.23)    | 1.3×10 <sup>-2</sup>   | 0.886     | 33           | MR Egger |             |
|                   |             | Any stroke (OR)                 | 0.95 (0.90; 1.01)    | 1.0×10 <sup>-1</sup>   | 0.119     | 34           | MR Egger |             |
|                   |             | Any ischemic stroke (OR)        | 0.97 (0.92; 1.03)    | 3.2×10 <sup>-1</sup>   | 0.631     | 33           | MR Egger |             |
|                   |             | LDL cholesterol (mmol/l)        | 0.00 (-0.01; 0.01)   | 9.3×10 <sup>-1</sup>   | 0.015     | 40           | MR Egger |             |
|                   |             | Apolipoprotein B (g/l)          | -0.00 (-0.00; 0.00)  | 4.2×10 <sup>-1</sup>   | <0.001    | 40           | MR Egger |             |
|                   |             | Triglycerides (mmol/l)          | -0.00 (-0.01; 0.01)  | 8.4×10 <sup>-1</sup>   | 0.043     | 40           | MR Egger |             |
|                   |             | Cholesterol (mmol/l)            | -0.00 (-0.02; 0.01)  | 7.2×10 <sup>-1</sup>   | 0.052     | 40           | MR Egger |             |
|                   |             | HDL cholesterol (mmol/l)        | 0.00 (-0.00; 0.00)   | 9.9×10 <sup>-1</sup>   | 0.033     | 37           | MR Egger |             |
|                   |             | Apolipoprotein A1 (g/l)         | -0.00 (-0.01; 0.00)  | 1.4×10 <sup>-1</sup>   | 0.017     | 38           | MR Egger |             |
|                   |             | Glucose (mmol/l)                | 0.00 (-0.02; 0.02)   | 9.4×10 <sup>-1</sup>   | 0.095     | 40           | MR Egger |             |
|                   |             | Glycated haemoglobin (mmol/mol) | 0.07 (-0.01; 0.15)   | 9.1×10 <sup>-2</sup>   | 0.005     | 33           | MR Egger |             |
|                   |             | T2DM (OR)                       | 1.03 (1.02; 1.04)    | 2.6×10 <sup>-7</sup>   | 0.244     | 29           | IVW      |             |
|                   |             | BMI (SD)                        | 0.01 (0.01; 0.01)    | 1.6×10 <sup>-11</sup>  | 0.040     | 30           | IVW      |             |
|                   |             | SBP (mmHg)                      | -0.14 (-0.30; 0.03)  | 9.9×10 <sup>-2</sup>   | 0.474     | 30           | MR Egger |             |
|                   |             | DBP (mmHg)                      | -0.02 (-0.12; 0.07)  | 6.2×10 <sup>-1</sup>   | 0.042     | 30           | MR Egger |             |
|                   |             | ECG heart rate (exercise) (BPM) | -0.76 (-1.16; -0.36) | 1.8×10 <sup>-4</sup>   | 0.002     | 39           | MR Egger |             |
|                   |             | ECG load (exercise) (Watts)     | -0.53 (-0.97; -0.08) | 2.0×10 <sup>-2</sup>   | 0.024     | 38           | MR Egger |             |
|                   |             | Asthma (OR)                     | 1.02 (1.01; 1.03)    | 1.5×10 <sup>-3</sup>   | 0.205     | 33           | IVW      |             |
|                   |             | CRP (log(mg/L))                 | -0.03 (-0.06; 0.00)  | 8.1×10 <sup>-2</sup>   | 0.208     | 32           | MR Egger |             |
|                   |             | eGFR (SD of log(eGFR))          | -0.00 (-0.00; 0.00)  | 7.1×10 <sup>-1</sup>   | 0.131     | 29           | MR Egger |             |
|                   |             | BUN (mg/dl)                     | -0.00 (-0.01; -0.00) | 3.5×10 <sup>-6</sup>   | 0.426     | 29           | IVW      |             |
|                   |             | CKD (OR)                        | 0.99 (0.97; 1.01)    | 4.5×10 <sup>-1</sup>   | 0.002     | 25           | IVW      |             |
|                   |             | Alzheimer's (OR)                | 0.99 (0.98; 1.01)    | 4.1×10 <sup>-1</sup>   | 0.060     | 30           | MR Egger |             |
|                   |             | Parkinson's (OR)                | 0.96 (0.93; 0.99)    | 2.1×10 <sup>-2</sup>   | 0.046     | 25           | IVW      |             |
|                   |             | Lewy body dementia (OR)         | 1.69 (1.36; 2.11)    | 3.0×10 <sup>-6</sup>   | 0.088     | 9            | IVW      |             |
|                   |             | Breast cancer (OR)              | 0.96 (0.91; 1.02)    | 1.7×10 <sup>-1</sup>   | 0.012     | 36           | MR Egger |             |
|                   |             | Lung cancer (OR)                | 1.15 (1.09; 1.22)    | 7.6×10 <sup>-7</sup>   | 0.026     | 34           | IVW      |             |
|                   |             | Colon cancer (OR)               | 0.93 (0.82; 1.05)    | 2.3×10 <sup>-1</sup>   | 0.932     | 36           | MR Egger |             |
|                   |             | Prostate cancer (OR)            | 0.95 (0.87; 1.03)    | 2.3×10 <sup>-1</sup>   | 0.098     | 36           | MR Egger |             |
| IL8 (P10145)      | Druggable   | HF (OR)                         | 0.74 (0.69; 0.81)    | 4.8×10 <sup>-13</sup>  | 0.576     | 3            | IVW      | Scallop     |
|                   |             | Non-ischemic CM (OR)            | 0.69 (0.51; 0.91)    | 1.0×10 <sup>-2</sup>   | 0.732     | 3            | IVW      |             |
|                   |             | DCM (OR)                        | 1.46 (1.04; 2.04)    | 2.9×10 <sup>-2</sup>   | 0.708     | 3            | IVW      |             |
|                   |             | AF (OR)                         | 0.83 (0.77; 0.89)    | 9.3×10 <sup>-8</sup>   | 0.314     | 3            | IVW      |             |
|                   |             | CHD (OR)                        | 1.18 (1.11; 1.25)    | 1.2×10 <sup>-8</sup>   | 0.909     | 5            | IVW      |             |
|                   |             | clMT (mm)                       | 0.02 (0.02; 0.03)    | 7.8×10 <sup>-10</sup>  | 0.557     | 3            | IVW      |             |
|                   |             | Carotid plaque (OR)             | 1.35 (1.13; 1.61)    | 8.6×10 <sup>-4</sup>   | 0.396     | 3            | IVW      |             |
|                   |             | Any stroke (OR)                 | 0.84 (0.76; 0.92)    | 3.2×10 <sup>-4</sup>   | 0.958     | 3            | IVW      |             |
|                   |             | Any ischemic stroke (OR)        | 0.94 (0.85; 1.05)    | 2.7×10 <sup>-1</sup>   | 0.983     | 3            | IVW      |             |
|                   |             | LDL cholesterol (mmol/l)        | 0.01 (-0.01; 0.03)   | 2.7×10 <sup>-1</sup>   | 0.873     | 3            | IVW      |             |
|                   |             | Apolipoprotein B (g/l)          | -0.00 (-0.01; 0.00)  | 7.6×10 <sup>-1</sup>   | 0.953     | 3            | IVW      |             |
|                   |             | Triglycerides (mmol/l)          | -0.03 (-0.05; -0.01) | 2.2×10 <sup>-3</sup>   | 0.507     | 3            | IVW      |             |
|                   |             | Cholesterol (mmol/l)            | 0.01 (-0.01; 0.03)   | 3.5×10 <sup>-1</sup>   | 0.774     | 3            | IVW      |             |
|                   |             | HDL cholesterol (mmol/l)        | 0.01 (-0.00; 0.01)   | 7.9×10 <sup>-2</sup>   | 0.446     | 3            | IVW      |             |
|                   |             | Apolipoprotein A1 (g/l)         | 0.01 (0.00; 0.01)    | 4.7×10 <sup>-3</sup>   | 0.487     | 3            | IVW      |             |
|                   |             | Glucose (mmol/l)                | 0.00 (-0.03; 0.03)   | 9.1×10 <sup>-1</sup>   | 0.627     | 3            | IVW      |             |
|                   |             | Glycated haemoglobin (mmol/mol) | -0.23 (-0.36; -0.09) | 1.0×10 <sup>-3</sup>   | 0.900     | 3            | IVW      |             |
|                   |             | T2DM (OR)                       | 1.02 (0.96; 1.08)    | 5.7×10 <sup>-1</sup>   | 0.806     | 3            | IVW      |             |



**Table S16:** Phenome-wide drug target MR scan of proteins with a prioritized CMR association. (*continued*)

| Protein (uniprot) | Protein set | Trait                           | Estimate (95%CI)     | P-value                | Q p-value | No. Variants | MR model | PQTL source |
|-------------------|-------------|---------------------------------|----------------------|------------------------|-----------|--------------|----------|-------------|
|                   |             | BMI (SD)                        | -0.02 (-0.04; -0.00) | 3.7×10 <sup>-2</sup>   | 0.238     | 3            | IWW      |             |
|                   |             | SBP (mmHg)                      | 0.67 (0.39; 0.95)    | 2.5×10 <sup>-6</sup>   | 0.385     | 3            | IWW      |             |
|                   |             | DBP (mmHg)                      | 0.32 (0.16; 0.48)    | 7.0×10 <sup>-5</sup>   | 0.897     | 3            | IWW      |             |
|                   |             | ECG heart rate (exercise) (BPM) | 1.89 (1.13; 2.65)    | 1.2×10 <sup>-6</sup>   | 0.628     | 3            | IWW      |             |
|                   |             | ECG load (exercise) (Watts)     | 2.26 (1.40; 3.11)    | 2.2×10 <sup>-7</sup>   | 0.725     | 3            | IWW      |             |
|                   |             | Asthma (OR)                     | 1.16 (1.11; 1.22)    | 2.2×10 <sup>-9</sup>   | 0.974     | 3            | IWW      |             |
|                   |             | CRP (log(mg/L))                 | 0.03 (-0.01; 0.08)   | 1.8×10 <sup>-1</sup>   | 0.610     | 3            | IWW      |             |
|                   |             | eGFR (SD of log(eGFR))          | -0.00 (-0.00; 0.00)  | 9.9×10 <sup>-1</sup>   | 0.641     | 3            | IWW      |             |
|                   |             | BUN (mg/dl)                     | -0.01 (-0.02; -0.00) | 1.8×10 <sup>-2</sup>   | 0.867     | 3            | IWW      |             |
|                   |             | CKD (OR)                        | 0.65 (0.59; 0.71)    | 1.0×10 <sup>-100</sup> | 0.932     | 3            | IWW      |             |
|                   |             | Alzheimer's (OR)                | 1.04 (1.02; 1.05)    | 3.3×10 <sup>-5</sup>   | 0.411     | 3            | IWW      |             |
|                   |             | Parkinson's (OR)                | 1.01 (0.84; 1.22)    | 8.8×10 <sup>-1</sup>   | 0.863     | 3            | IWW      |             |
|                   |             | Lewy body dementia (OR)         | 0.61 (0.16; 2.31)    | 4.7×10 <sup>-1</sup>   | None      | 1            | Wald     |             |
|                   |             | Breast cancer (OR)              | 0.89 (0.71; 1.12)    | 3.2×10 <sup>-1</sup>   | 0.971     | 3            | IWW      |             |
|                   |             | Lung cancer (OR)                | 0.63 (0.37; 1.09)    | 1.0×10 <sup>-1</sup>   | 0.847     | 3            | IWW      |             |
|                   |             | Colon cancer (OR)               | 1.25 (0.76; 2.04)    | 3.8×10 <sup>-1</sup>   | 0.748     | 3            | IWW      |             |
|                   |             | Prostate cancer (OR)            | 1.03 (0.74; 1.41)    | 8.8×10 <sup>-1</sup>   | 0.307     | 3            | IWW      |             |
| LYAM1 (P14151)    | Druggable   | HF (OR)                         | 0.96 (0.92; 0.99)    | 1.3×10 <sup>-2</sup>   | 0.140     | 27           | MR Egger | Interval    |
|                   |             | Non-ischemic CM (OR)            | 0.93 (0.81; 1.06)    | 2.7×10 <sup>-1</sup>   | 0.250     | 31           | MR Egger |             |
|                   |             | DCM (OR)                        | 1.01 (0.85; 1.21)    | 9.0×10 <sup>-1</sup>   | 0.004     | 30           | MR Egger |             |
|                   |             | AF (OR)                         | 0.88 (0.85; 0.91)    | 1.0×10 <sup>-100</sup> | <0.001    | 28           | MR Egger |             |
|                   |             | CHD (OR)                        | 1.01 (1.00; 1.02)    | 1.8×10 <sup>-1</sup>   | 0.002     | 31           | IWW      |             |
|                   |             | cIMT (mm)                       | -0.00 (-0.00; 0.00)  | 8.2×10 <sup>-2</sup>   | <0.001    | 32           | IWW      |             |
|                   |             | Carotid plaque (OR)             | 1.11 (1.08; 1.14)    | 1.0×10 <sup>-13</sup>  | <0.001    | 29           | IWW      |             |
|                   |             | Any stroke (OR)                 | 0.92 (0.89; 0.95)    | 7.9×10 <sup>-7</sup>   | 0.290     | 32           | MR Egger |             |
|                   |             | Any ischemic stroke (OR)        | 1.00 (0.98; 1.01)    | 5.7×10 <sup>-1</sup>   | 0.101     | 29           | IWW      |             |
|                   |             | LDL cholesterol (mmol/l)        | -0.00 (-0.00; 0.00)  | 1.0×10 <sup>-1</sup>   | 0.269     | 33           | IWW      |             |
|                   |             | Apolipoprotein B (g/l)          | -0.00 (-0.00; -0.00) | 6.3×10 <sup>-3</sup>   | 0.844     | 33           | IWW      |             |
|                   |             | Triglycerides (mmol/l)          | -0.00 (-0.00; 0.00)  | 3.2×10 <sup>-1</sup>   | 0.011     | 32           | IWW      |             |
|                   |             | Cholesterol (mmol/l)            | -0.01 (-0.01; -0.00) | 2.1×10 <sup>-3</sup>   | 0.126     | 33           | IWW      |             |
|                   |             | HDL cholesterol (mmol/l)        | 0.00 (-0.00; 0.00)   | 3.7×10 <sup>-1</sup>   | 0.007     | 31           | MR Egger |             |
|                   |             | Apolipoprotein A1 (g/l)         | -0.00 (-0.00; 0.00)  | 8.3×10 <sup>-1</sup>   | 0.343     | 30           | MR Egger |             |
|                   |             | Glucose (mmol/l)                | 0.01 (-0.00; 0.03)   | 9.2×10 <sup>-2</sup>   | 0.126     | 31           | MR Egger |             |
|                   |             | Glycated haemoglobin (mmol/mol) | -0.08 (-0.10; -0.06) | 1.2×10 <sup>-13</sup>  | 0.123     | 31           | IWW      |             |
|                   |             | T2DM (OR)                       | 1.01 (0.99; 1.04)    | 2.9×10 <sup>-1</sup>   | 0.878     | 31           | MR Egger |             |
|                   |             | BMI (SD)                        | -0.01 (-0.01; 0.00)  | 1.9×10 <sup>-1</sup>   | 0.173     | 31           | MR Egger |             |
|                   |             | SBP (mmHg)                      | -0.32 (-0.49; -0.16) | 1.1×10 <sup>-4</sup>   | <0.001    | 26           | MR Egger |             |
|                   |             | DBP (mmHg)                      | -0.16 (-0.23; -0.09) | 5.5×10 <sup>-6</sup>   | 0.021     | 28           | MR Egger |             |
|                   |             | ECG heart rate (exercise) (BPM) | 0.43 (0.09; 0.76)    | 1.3×10 <sup>-2</sup>   | 0.287     | 31           | MR Egger |             |
|                   |             | ECG load (exercise) (Watts)     | 0.52 (0.15; 0.89)    | 5.4×10 <sup>-3</sup>   | 0.092     | 31           | MR Egger |             |
|                   |             | Asthma (OR)                     | 0.97 (0.94; 0.99)    | 5.7×10 <sup>-3</sup>   | 0.005     | 29           | MR Egger |             |
|                   |             | CRP (log(mg/L))                 | 0.02 (0.02; 0.03)    | 2.1×10 <sup>-13</sup>  | 0.012     | 31           | IWW      |             |
|                   |             | eGFR (SD of log(eGFR))          | -0.00 (-0.00; -0.00) | 7.9×10 <sup>-3</sup>   | 0.011     | 31           | MR Egger |             |
|                   |             | BUN (mg/dl)                     | 0.00 (-0.00; 0.00)   | 8.6×10 <sup>-1</sup>   | 0.200     | 28           | MR Egger |             |
|                   |             | CKD (OR)                        | 1.00 (0.99; 1.02)    | 5.2×10 <sup>-1</sup>   | 0.362     | 32           | IWW      |             |
|                   |             | Alzheimer's (OR)                | 0.99 (0.99; 1.00)    | 1.0×10 <sup>-5</sup>   | 0.103     | 33           | IWW      |             |
|                   |             | Parkinson's (OR)                | 1.10 (1.01; 1.21)    | 3.6×10 <sup>-2</sup>   | 0.516     | 30           | MR Egger |             |
|                   |             | Lewy body dementia (OR)         | 1.05 (0.99; 1.13)    | 1.1×10 <sup>-1</sup>   | 0.470     | 29           | IWW      |             |
|                   |             | Breast cancer (OR)              | 0.95 (0.93; 0.98)    | 3.8×10 <sup>-5</sup>   | 0.027     | 29           | IWW      |             |
|                   |             | Lung cancer (OR)                | 0.74 (0.67; 0.82)    | 1.2×10 <sup>-8</sup>   | 0.213     | 32           | MR Egger |             |
|                   |             | Colon cancer (OR)               | 1.00 (0.90; 1.10)    | 9.4×10 <sup>-1</sup>   | 0.170     | 31           | MR Egger |             |
|                   |             | Prostate cancer (OR)            | 0.91 (0.89; 0.93)    | 8.9×10 <sup>-16</sup>  | 0.014     | 31           | IWW      |             |
| MFGM (Q08431)     | Druggable   | HF (OR)                         | 0.98 (0.96; 1.00)    | 1.1×10 <sup>-1</sup>   | 0.031     | 8            | IWW      | Interval    |
|                   |             | Non-ischemic CM (OR)            | 1.02 (0.92; 1.13)    | 7.3×10 <sup>-1</sup>   | 0.684     | 8            | IWW      |             |
|                   |             | DCM (OR)                        | 1.43 (1.22; 1.68)    | 1.0×10 <sup>-5</sup>   | 0.022     | 8            | IWW      |             |
|                   |             | AF (OR)                         | 0.93 (0.89; 0.97)    | 1.4×10 <sup>-3</sup>   | 0.475     | 8            | IWW      |             |
|                   |             | CHD (OR)                        | 0.97 (0.91; 1.04)    | 3.9×10 <sup>-1</sup>   | 0.790     | 8            | IWW      |             |
|                   |             | cIMT (mm)                       | 0.00 (-0.00; 0.00)   | 5.2×10 <sup>-1</sup>   | 0.035     | 9            | IWW      |             |
|                   |             | Carotid plaque (OR)             | 1.04 (0.81; 1.32)    | 7.7×10 <sup>-1</sup>   | 0.510     | 9            | MR Egger |             |
|                   |             | Any stroke (OR)                 | 1.02 (0.99; 1.05)    | 2.7×10 <sup>-1</sup>   | 0.316     | 9            | IWW      |             |
|                   |             | Any ischemic stroke (OR)        | 1.03 (0.99; 1.07)    | 1.3×10 <sup>-1</sup>   | 0.248     | 9            | IWW      |             |
|                   |             | LDL cholesterol (mmol/l)        | -0.02 (-0.02; -0.01) | 9.0×10 <sup>-9</sup>   | 0.731     | 9            | IWW      |             |
|                   |             | Apolipoprotein B (g/l)          | -0.00 (-0.01; -0.00) | 9.6×10 <sup>-11</sup>  | 0.550     | 9            | IWW      |             |
|                   |             | Triglycerides (mmol/l)          | -0.02 (-0.03; -0.01) | 1.2×10 <sup>-6</sup>   | 0.116     | 9            | IWW      |             |
|                   |             | Cholesterol (mmol/l)            | -0.02 (-0.02; -0.01) | 6.3×10 <sup>-6</sup>   | 0.862     | 9            | IWW      |             |
|                   |             | HDL cholesterol (mmol/l)        | 0.00 (-0.00; 0.01)   | 6.3×10 <sup>-2</sup>   | 0.094     | 8            | IWW      |             |

**Table S16:** Phenome-wide drug target MR scan of proteins with a prioritized CMR association. (*continued*)

| Protein (uniprot) | Protein set | Trait                           | Estimate (95%CI)     | P-value                | Q p-value | No. Variants | MR model | PQTL source |
|-------------------|-------------|---------------------------------|----------------------|------------------------|-----------|--------------|----------|-------------|
|                   |             | Apolipoprotein A1 (g/l)         | 0.02 (-0.00; 0.03)   | 1.4×10 <sup>-1</sup>   | 0.113     | 8            | MR Egger |             |
|                   |             | Glucose (mmol/l)                | -0.02 (-0.09; 0.04)  | 4.9×10 <sup>-1</sup>   | 0.376     | 9            | MR Egger |             |
|                   |             | Glycated haemoglobin (mmol/mol) | -0.05 (-0.09; -0.01) | 2.1×10 <sup>-2</sup>   | 0.562     | 9            | IWV      |             |
|                   |             | T2DM (OR)                       | 1.00 (0.98; 1.02)    | 9.2×10 <sup>-1</sup>   | 0.403     | 8            | IWV      |             |
|                   |             | BMI (SD)                        | -0.02 (-0.02; -0.01) | 2.8×10 <sup>-7</sup>   | 0.021     | 8            | IWV      |             |
|                   |             | SBP (mmHg)                      | 0.05 (-0.07; 0.18)   | 4.0×10 <sup>-1</sup>   | 0.111     | 8            | IWV      |             |
|                   |             | DBP (mmHg)                      | 0.27 (0.19; 0.34)    | 5.4×10 <sup>-13</sup>  | 0.111     | 8            | IWV      |             |
|                   |             | ECG heart rate (exercise) (BPM) | 2.09 (0.13; 4.05)    | 3.6×10 <sup>-2</sup>   | 0.368     | 9            | MR Egger |             |
|                   |             | ECG load (exercise) (Watts)     | 0.39 (0.13; 0.64)    | 3.0×10 <sup>-3</sup>   | 0.665     | 9            | IWV      |             |
|                   |             | Asthma (OR)                     | 1.00 (0.99; 1.02)    | 9.5×10 <sup>-1</sup>   | 0.502     | 12           | IWV      |             |
|                   |             | CRP (log(mg/L))                 | -0.01 (-0.03; -0.00) | 3.1×10 <sup>-2</sup>   | 0.824     | 9            | IWV      |             |
|                   |             | eGFR (SD of log(eGFR))          | 0.00 (-0.00; 0.00)   | 6.0×10 <sup>-2</sup>   | 0.910     | 8            | IWV      |             |
|                   |             | BUN (mg/dl)                     | 0.00 (0.00; 0.01)    | 6.1×10 <sup>-3</sup>   | 0.967     | 8            | IWV      |             |
|                   |             | CKD (OR)                        | 0.99 (0.96; 1.02)    | 6.0×10 <sup>-1</sup>   | 0.494     | 8            | IWV      |             |
|                   |             | Alzheimer's (OR)                | 1.00 (0.99; 1.02)    | 5.9×10 <sup>-1</sup>   | 0.374     | 8            | IWV      |             |
|                   |             | Parkinson's (OR)                | 0.90 (0.84; 0.95)    | 6.6×10 <sup>-4</sup>   | 0.447     | 8            | IWV      |             |
|                   |             | Lewy body dementia (OR)         | 0.92 (0.67; 1.26)    | 5.9×10 <sup>-1</sup>   | 0.388     | 7            | IWV      |             |
|                   |             | Breast cancer (OR)              | 0.97 (0.89; 1.06)    | 5.4×10 <sup>-1</sup>   | 0.719     | 8            | IWV      |             |
|                   |             | Lung cancer (OR)                | 0.98 (0.77; 1.23)    | 8.5×10 <sup>-1</sup>   | 0.406     | 8            | IWV      |             |
|                   |             | Colon cancer (OR)               | 1.15 (0.93; 1.43)    | 2.1×10 <sup>-1</sup>   | 0.232     | 8            | IWV      |             |
|                   |             | Prostate cancer (OR)            | 0.99 (0.88; 1.11)    | 8.1×10 <sup>-1</sup>   | 0.831     | 8            | IWV      |             |
| MK03 (P27361)     | Druggable   | HF (OR)                         | 0.85 (0.80; 0.91)    | 3.9×10 <sup>-7</sup>   | 0.768     | 3            | IWV      | Interval    |
|                   |             | Non-ischemic CM (OR)            | 0.77 (0.57; 1.02)    | 7.0×10 <sup>-2</sup>   | 0.499     | 3            | IWV      |             |
|                   |             | DCM (OR)                        | 0.82 (0.61; 1.10)    | 1.9×10 <sup>-1</sup>   | 0.503     | 3            | IWV      |             |
|                   |             | AF (OR)                         | 0.86 (0.82; 0.91)    | 6.2×10 <sup>-8</sup>   | 0.663     | 3            | IWV      |             |
|                   |             | CHD (OR)                        | 1.00 (0.94; 1.07)    | 8.9×10 <sup>-1</sup>   | 0.909     | 3            | IWV      |             |
|                   |             | clIMT (mm)                      | 0.00 (-0.00; 0.01)   | 1.1×10 <sup>-1</sup>   | 0.807     | 3            | IWV      |             |
|                   |             | Carotid plaque (OR)             | 1.13 (0.98; 1.30)    | 8.1×10 <sup>-2</sup>   | 0.702     | 3            | IWV      |             |
|                   |             | Any stroke (OR)                 | 1.16 (1.08; 1.25)    | 6.3×10 <sup>-5</sup>   | 0.846     | 3            | IWV      |             |
|                   |             | Any ischemic stroke (OR)        | 1.14 (1.05; 1.23)    | 1.0×10 <sup>-3</sup>   | 0.932     | 3            | IWV      |             |
|                   |             | LDL cholesterol (mmol/l)        | 0.01 (-0.01; 0.04)   | 3.3×10 <sup>-1</sup>   | 0.613     | 3            | IWV      |             |
|                   |             | Apolipoprotein B (g/l)          | 0.00 (-0.01; 0.01)   | 8.0×10 <sup>-1</sup>   | 0.736     | 3            | IWV      |             |
|                   |             | Triglycerides (mmol/l)          | -0.04 (-0.07; -0.01) | 1.9×10 <sup>-2</sup>   | 0.581     | 3            | IWV      |             |
|                   |             | Cholesterol (mmol/l)            | 0.03 (-0.00; 0.07)   | 7.0×10 <sup>-2</sup>   | 0.709     | 3            | IWV      |             |
|                   |             | HDL cholesterol (mmol/l)        | 0.03 (0.02; 0.04)    | 4.8×10 <sup>-6</sup>   | 0.798     | 3            | IWV      |             |
|                   |             | Apolipoprotein A1 (g/l)         | 0.02 (0.01; 0.03)    | 3.0×10 <sup>-6</sup>   | 0.576     | 3            | IWV      |             |
|                   |             | Glucose (mmol/l)                | 0.08 (-0.10; 0.26)   | 3.9×10 <sup>-1</sup>   | 0.306     | 3            | MR Egger |             |
|                   |             | Glycated haemoglobin (mmol/mol) | 1.18 (0.26; 2.09)    | 1.1×10 <sup>-2</sup>   | 0.710     | 3            | MR Egger |             |
|                   |             | T2DM (OR)                       | 0.82 (0.53; 1.25)    | 3.5×10 <sup>-1</sup>   | 0.143     | 3            | MR Egger |             |
|                   |             | BMI (SD)                        | -0.15 (-0.17; -0.14) | 1.0×10 <sup>-100</sup> | 0.361     | 3            | IWV      |             |
|                   |             | SBP (mmHg)                      | -0.22 (-1.87; 1.43)  | 7.9×10 <sup>-1</sup>   | 0.230     | 3            | MR Egger |             |
|                   |             | DBP (mmHg)                      | 0.13 (-1.14; 1.40)   | 8.4×10 <sup>-1</sup>   | 0.110     | 3            | MR Egger |             |
|                   |             | ECG heart rate (exercise) (BPM) | 0.10 (-1.36; 1.56)   | 8.9×10 <sup>-1</sup>   | 0.205     | 3            | IWV      |             |
|                   |             | ECG load (exercise) (Watts)     | -0.37 (-2.25; 1.51)  | 7.0×10 <sup>-1</sup>   | 0.124     | 3            | IWV      |             |
|                   |             | Asthma (OR)                     | 0.93 (0.87; 1.00)    | 6.5×10 <sup>-2</sup>   | 0.438     | 4            | IWV      |             |
|                   |             | CRP (log(mg/L))                 | -0.05 (-0.08; -0.02) | 2.1×10 <sup>-3</sup>   | 0.919     | 3            | IWV      |             |
|                   |             | eGFR (SD of log(eGFR))          | 0.01 (0.01; 0.01)    | 9.6×10 <sup>-10</sup>  | 0.736     | 3            | IWV      |             |
|                   |             | BUN (mg/dl)                     | 0.01 (-0.04; 0.05)   | 8.1×10 <sup>-1</sup>   | 0.217     | 3            | MR Egger |             |
|                   |             | CKD (OR)                        | 0.94 (0.86; 1.02)    | 1.2×10 <sup>-1</sup>   | 0.287     | 3            | IWV      |             |
|                   |             | Alzheimer's (OR)                | 1.30 (0.82; 2.08)    | 2.7×10 <sup>-1</sup>   | 0.039     | 3            | MR Egger |             |
|                   |             | Parkinson's (OR)                | 1.01 (0.79; 1.29)    | 9.4×10 <sup>-1</sup>   | 0.101     | 3            | IWV      |             |
|                   |             | Lewy body dementia (OR)         | 2.02 (1.43; 2.86)    | 7.5×10 <sup>-5</sup>   | 0.212     | 3            | IWV      |             |
|                   |             | Breast cancer (OR)              | 0.87 (0.70; 1.09)    | 2.3×10 <sup>-1</sup>   | 0.832     | 2            | IWV      |             |
|                   |             | Lung cancer (OR)                | 0.84 (0.46; 1.53)    | 5.6×10 <sup>-1</sup>   | 0.834     | 2            | IWV      |             |
|                   |             | Colon cancer (OR)               | 0.90 (0.56; 1.44)    | 6.6×10 <sup>-1</sup>   | 0.767     | 2            | IWV      |             |
|                   |             | Prostate cancer (OR)            | 1.17 (0.86; 1.58)    | 3.2×10 <sup>-1</sup>   | 0.784     | 2            | IWV      |             |
| PA2GA (P14555)    | Druggable   | HF (OR)                         | 1.05 (1.03; 1.06)    | 2.1×10 <sup>-9</sup>   | <0.001    | 42           | MR Egger | Interval    |
|                   |             | Non-ischemic CM (OR)            | 1.01 (0.92; 1.11)    | 8.8×10 <sup>-1</sup>   | 0.121     | 43           | MR Egger |             |
|                   |             | DCM (OR)                        | 1.13 (1.03; 1.23)    | 8.6×10 <sup>-3</sup>   | 0.082     | 44           | MR Egger |             |
|                   |             | AF (OR)                         | 1.00 (1.00; 1.00)    | 8.6×10 <sup>-1</sup>   | 0.002     | 46           | IWV      |             |
|                   |             | CHD (OR)                        | 0.99 (0.97; 1.01)    | 4.9×10 <sup>-1</sup>   | <0.001    | 39           | MR Egger |             |
|                   |             | clIMT (mm)                      | -0.00 (-0.00; -0.00) | 1.1×10 <sup>-6</sup>   | 0.175     | 43           | IWV      |             |
|                   |             | Carotid plaque (OR)             | 1.02 (1.00; 1.03)    | 7.7×10 <sup>-3</sup>   | 0.415     | 42           | IWV      |             |
|                   |             | Any stroke (OR)                 | 1.03 (1.00; 1.05)    | 2.5×10 <sup>-2</sup>   | 0.073     | 40           | MR Egger |             |
|                   |             | Any ischemic stroke (OR)        | 1.01 (0.99; 1.04)    | 3.4×10 <sup>-1</sup>   | 0.142     | 39           | MR Egger |             |
|                   |             | LDL cholesterol (mmol/l)        | 0.00 (0.00; 0.01)    | 3.0×10 <sup>-4</sup>   | <0.001    | 50           | MR Egger |             |

**Table S16:** Phenome-wide drug target MR scan of proteins with a prioritized CMR association. (*continued*)

| Protein (uniprot) | Protein set | Trait                           | Estimate (95%CI)     | P-value                | Q p-value | No. Variants | MR model | PQTL source |
|-------------------|-------------|---------------------------------|----------------------|------------------------|-----------|--------------|----------|-------------|
|                   |             | Apolipoprotein B (g/l)          | 0.00 (0.00; 0.00)    | 6.3×10 <sup>-3</sup>   | <0.001    | 51           | MR Egger |             |
|                   |             | Triglycerides (mmol/l)          | -0.01 (-0.01; -0.00) | 4.5×10 <sup>-5</sup>   | 0.072     | 52           | MR Egger |             |
|                   |             | Cholesterol (mmol/l)            | 0.01 (0.00; 0.01)    | 7.2×10 <sup>-4</sup>   | <0.001    | 53           | MR Egger |             |
|                   |             | HDL cholesterol (mmol/l)        | 0.00 (0.00; 0.00)    | 1.0×10 <sup>-6</sup>   | <0.001    | 45           | MR Egger |             |
|                   |             | Apolipoprotein A1 (g/l)         | 0.00 (0.00; 0.00)    | 3.0×10 <sup>-2</sup>   | <0.001    | 46           | MR Egger |             |
|                   |             | Glucose (mmol/l)                | -0.00 (-0.00; -0.00) | 2.2×10 <sup>-4</sup>   | <0.001    | 51           | IWV      |             |
|                   |             | Glycated haemoglobin (mmol/mol) | -0.07 (-0.09; -0.05) | 2.9×10 <sup>-10</sup>  | 0.007     | 51           | MR Egger |             |
|                   |             | T2DM (OR)                       | 1.00 (0.99; 1.02)    | 9.5×10 <sup>-1</sup>   | 0.182     | 43           | MR Egger |             |
|                   |             | BMI (SD)                        | -0.01 (-0.01; -0.00) | 1.4×10 <sup>-13</sup>  | 0.005     | 42           | IWV      |             |
|                   |             | SBP (mmHg)                      | -0.04 (-0.13; 0.06)  | 4.5×10 <sup>-1</sup>   | 0.017     | 33           | MR Egger |             |
|                   |             | DBP (mmHg)                      | 0.00 (-0.04; 0.04)   | 9.9×10 <sup>-1</sup>   | 0.005     | 40           | MR Egger |             |
|                   |             | ECG heart rate (exercise) (BPM) | -0.05 (-0.11; -0.00) | 3.6×10 <sup>-2</sup>   | 0.004     | 47           | IWV      |             |
|                   |             | ECG load (exercise) (Watts)     | -0.02 (-0.08; 0.03)  | 4.5×10 <sup>-1</sup>   | <0.001    | 50           | IWV      |             |
|                   |             | Asthma (OR)                     | 1.01 (1.00; 1.02)    | 4.6×10 <sup>-2</sup>   | 0.056     | 51           | MR Egger |             |
|                   |             | CRP (log(mg/L))                 | -0.01 (-0.02; -0.00) | 3.9×10 <sup>-2</sup>   | 0.041     | 43           | MR Egger |             |
|                   |             | eGFR (SD of log(eGFR))          | -0.00 (-0.00; -0.00) | 8.2×10 <sup>-6</sup>   | 0.012     | 41           | MR Egger |             |
|                   |             | BUN (mg/dl)                     | -0.00 (-0.00; 0.00)  | 6.6×10 <sup>-1</sup>   | <0.001    | 43           | MR Egger |             |
|                   |             | CKD (OR)                        | 1.03 (1.00; 1.05)    | 3.9×10 <sup>-2</sup>   | <0.001    | 39           | MR Egger |             |
|                   |             | Alzheimer's (OR)                | 1.00 (0.99; 1.00)    | 7.5×10 <sup>-2</sup>   | 0.015     | 41           | MR Egger |             |
|                   |             | Parkinson's (OR)                | 0.98 (0.93; 1.04)    | 5.8×10 <sup>-1</sup>   | 0.004     | 43           | MR Egger |             |
|                   |             | Lewy body dementia (OR)         | 1.04 (1.00; 1.08)    | 3.4×10 <sup>-2</sup>   | 0.051     | 36           | IWV      |             |
|                   |             | Breast cancer (OR)              | 0.93 (0.91; 0.95)    | 1.6×10 <sup>-9</sup>   | 0.278     | 41           | MR Egger |             |
|                   |             | Lung cancer (OR)                | 1.13 (1.07; 1.19)    | 6.0×10 <sup>-6</sup>   | 0.014     | 45           | MR Egger |             |
|                   |             | Colon cancer (OR)               | 0.91 (0.86; 0.96)    | 1.4×10 <sup>-3</sup>   | 0.003     | 42           | MR Egger |             |
|                   |             | Prostate cancer (OR)            | 1.01 (0.99; 1.04)    | 3.4×10 <sup>-1</sup>   | 0.003     | 44           | MR Egger |             |
| PD1L2 (Q9BQ51)    | Druggable   | HF (OR)                         | 1.04 (0.99; 1.09)    | 1.5×10 <sup>-1</sup>   | 0.020     | 29           | MR Egger | Interval    |
|                   |             | Non-ischemic CM (OR)            | 1.08 (0.86; 1.35)    | 5.2×10 <sup>-1</sup>   | 0.120     | 31           | MR Egger |             |
|                   |             | DCM (OR)                        | 0.98 (0.77; 1.24)    | 8.5×10 <sup>-1</sup>   | 0.571     | 30           | MR Egger |             |
|                   |             | AF (OR)                         | 1.03 (0.99; 1.07)    | 2.2×10 <sup>-1</sup>   | 0.020     | 31           | MR Egger |             |
|                   |             | CHD (OR)                        | 1.00 (0.98; 1.01)    | 7.2×10 <sup>-1</sup>   | 0.794     | 26           | IWV      |             |
|                   |             | cIMT (mm)                       | 0.00 (-0.00; 0.00)   | 9.3×10 <sup>-1</sup>   | 0.440     | 31           | MR Egger |             |
|                   |             | Carotid plaque (OR)             | 0.99 (0.96; 1.02)    | 3.7×10 <sup>-1</sup>   | 0.175     | 26           | IWV      |             |
|                   |             | Any stroke (OR)                 | 1.02 (1.00; 1.04)    | 3.8×10 <sup>-2</sup>   | 0.665     | 24           | IWV      |             |
|                   |             | Any ischemic stroke (OR)        | 1.03 (0.96; 1.11)    | 3.9×10 <sup>-1</sup>   | 0.063     | 31           | MR Egger |             |
|                   |             | LDL cholesterol (mmol/l)        | -0.01 (-0.03; 0.00)  | 5.4×10 <sup>-2</sup>   | 0.174     | 32           | MR Egger |             |
|                   |             | Apolipoprotein B (g/l)          | -0.00 (-0.01; 0.00)  | 1.0×10 <sup>-1</sup>   | 0.127     | 32           | MR Egger |             |
|                   |             | Triglycerides (mmol/l)          | -0.01 (-0.02; 0.01)  | 4.5×10 <sup>-1</sup>   | 0.042     | 33           | MR Egger |             |
|                   |             | Cholesterol (mmol/l)            | -0.01 (-0.03; 0.00)  | 5.9×10 <sup>-2</sup>   | 0.591     | 32           | MR Egger |             |
|                   |             | HDL cholesterol (mmol/l)        | 0.00 (0.00; 0.01)    | 9.1×10 <sup>-11</sup>  | 0.046     | 29           | IWV      |             |
|                   |             | Apolipoprotein A1 (g/l)         | -0.00 (-0.00; 0.00)  | 9.9×10 <sup>-1</sup>   | 0.112     | 33           | MR Egger |             |
|                   |             | Glucose (mmol/l)                | 0.01 (-0.01; 0.03)   | 3.6×10 <sup>-1</sup>   | 0.844     | 33           | MR Egger |             |
|                   |             | Glycated haemoglobin (mmol/mol) | 0.04 (-0.05; 0.13)   | 3.4×10 <sup>-1</sup>   | 0.391     | 33           | MR Egger |             |
|                   |             | T2DM (OR)                       | 0.98 (0.97; 0.99)    | 9.8×10 <sup>-5</sup>   | 0.341     | 27           | IWV      |             |
|                   |             | BMI (SD)                        | -0.00 (-0.00; 0.00)  | 7.9×10 <sup>-1</sup>   | 0.100     | 28           | IWV      |             |
|                   |             | SBP (mmHg)                      | -0.02 (-0.08; 0.03)  | 4.3×10 <sup>-1</sup>   | 0.088     | 25           | IWV      |             |
|                   |             | DBP (mmHg)                      | -0.07 (-0.17; 0.04)  | 2.3×10 <sup>-1</sup>   | 0.357     | 30           | MR Egger |             |
|                   |             | ECG heart rate (exercise) (BPM) | 0.39 (-0.16; 0.93)   | 1.7×10 <sup>-1</sup>   | 0.208     | 33           | MR Egger |             |
|                   |             | ECG load (exercise) (Watts)     | -0.06 (-0.23; 0.11)  | 4.8×10 <sup>-1</sup>   | 0.186     | 32           | IWV      |             |
|                   |             | Asthma (OR)                     | 1.05 (1.04; 1.06)    | 1.0×10 <sup>-100</sup> | 0.002     | 24           | IWV      |             |
|                   |             | CRP (log(mg/L))                 | -0.01 (-0.01; -0.00) | 3.6×10 <sup>-2</sup>   | 0.431     | 27           | IWV      |             |
|                   |             | eGFR (SD of log(eGFR))          | 0.00 (-0.00; 0.00)   | 7.2×10 <sup>-1</sup>   | 0.948     | 26           | IWV      |             |
|                   |             | BUN (mg/dl)                     | -0.00 (-0.00; -0.00) | 1.4×10 <sup>-2</sup>   | 0.449     | 26           | IWV      |             |
|                   |             | CKD (OR)                        | 0.99 (0.97; 1.00)    | 9.0×10 <sup>-2</sup>   | 0.031     | 26           | IWV      |             |
|                   |             | Alzheimer's (OR)                | 1.01 (0.99; 1.02)    | 4.0×10 <sup>-1</sup>   | 0.137     | 30           | MR Egger |             |
|                   |             | Parkinson's (OR)                | 0.83 (0.80; 0.86)    | 1.0×10 <sup>-100</sup> | 0.023     | 26           | IWV      |             |
|                   |             | Lewy body dementia (OR)         | 1.01 (0.81; 1.26)    | 9.3×10 <sup>-1</sup>   | 0.565     | 31           | MR Egger |             |
|                   |             | Breast cancer (OR)              | 1.00 (0.98; 1.01)    | 7.8×10 <sup>-1</sup>   | 0.105     | 27           | IWV      |             |
|                   |             | Lung cancer (OR)                | 1.02 (0.98; 1.06)    | 4.5×10 <sup>-1</sup>   | 0.021     | 25           | IWV      |             |
|                   |             | Colon cancer (OR)               | 0.96 (0.92; 1.00)    | 4.5×10 <sup>-2</sup>   | 0.002     | 24           | IWV      |             |
|                   |             | Prostate cancer (OR)            | 0.94 (0.85; 1.04)    | 2.3×10 <sup>-1</sup>   | 0.020     | 27           | MR Egger |             |
| PMEL (P40967)     | Druggable   | HF (OR)                         | 0.96 (0.82; 1.13)    | 6.3×10 <sup>-1</sup>   | None      | 1            | Wald     | Interval    |
|                   |             | Non-ischemic CM (OR)            | 0.68 (0.34; 1.36)    | 2.8×10 <sup>-1</sup>   | None      | 1            | Wald     |             |
|                   |             | DCM (OR)                        | 0.50 (0.35; 0.71)    | 1.2×10 <sup>-4</sup>   | 0.911     | 2            | IWV      |             |
|                   |             | AF (OR)                         | 0.99 (0.92; 1.06)    | 6.9×10 <sup>-1</sup>   | 0.529     | 2            | IWV      |             |
|                   |             | CHD (OR)                        | 1.00 (0.84; 1.20)    | 9.6×10 <sup>-1</sup>   | None      | 1            | Wald     |             |
|                   |             | cIMT (mm)                       | -0.01 (-0.03; 0.00)  | 6.7×10 <sup>-2</sup>   | None      | 1            | Wald     |             |

**Table S16:** Phenome-wide drug target MR scan of proteins with a prioritized CMR association. (*continued*)

| Protein (uniprot) | Protein set | Trait                           | Estimate (95%CI)     | P-value                | Q p-value | No. Variants | MR model | PQTL source |
|-------------------|-------------|---------------------------------|----------------------|------------------------|-----------|--------------|----------|-------------|
|                   |             | Carotid plaque (OR)             | 0.67 (0.48; 0.92)    | 1.5×10 <sup>-2</sup>   | None      | 1            | Wald     |             |
|                   |             | Any stroke (OR)                 | 0.87 (0.72; 1.05)    | 1.4×10 <sup>-1</sup>   | None      | 1            | Wald     |             |
|                   |             | Any ischemic stroke (OR)        | 0.84 (0.68; 1.03)    | 8.9×10 <sup>-2</sup>   | None      | 1            | Wald     |             |
|                   |             | LDL cholesterol (mmol/l)        | -0.02 (-0.04; -0.00) | 1.8×10 <sup>-2</sup>   | 0.762     | 2            | IWW      |             |
|                   |             | Apolipoprotein B (g/l)          | -0.01 (-0.01; -0.00) | 4.5×10 <sup>-4</sup>   | 0.910     | 2            | IWW      |             |
|                   |             | Triglycerides (mmol/l)          | -0.06 (-0.08; -0.04) | 2.3×10 <sup>-8</sup>   | 0.924     | 2            | IWW      |             |
|                   |             | Cholesterol (mmol/l)            | -0.02 (-0.04; 0.01)  | 1.4×10 <sup>-1</sup>   | 0.803     | 2            | IWW      |             |
|                   |             | HDL cholesterol (mmol/l)        | 0.02 (0.01; 0.03)    | 5.5×10 <sup>-8</sup>   | 0.825     | 2            | IWW      |             |
|                   |             | Apolipoprotein A1 (g/l)         | 0.01 (0.01; 0.02)    | 2.8×10 <sup>-7</sup>   | 0.784     | 2            | IWW      |             |
|                   |             | Glucose (mmol/l)                | -0.01 (-0.03; 0.02)  | 4.6×10 <sup>-1</sup>   | 0.769     | 2            | IWW      |             |
|                   |             | Glycated haemoglobin (mmol/mol) | 0.11 (-0.02; 0.23)   | 9.8×10 <sup>-2</sup>   | 0.980     | 2            | IWW      |             |
|                   |             | T2DM (OR)                       | 1.00 (0.88; 1.13)    | 9.9×10 <sup>-1</sup>   | None      | 1            | Wald     |             |
|                   |             | BMI (SD)                        | 0.02 (-0.02; 0.06)   | 3.5×10 <sup>-1</sup>   | None      | 1            | Wald     |             |
|                   |             | SBP (mmHg)                      | -0.06 (-0.66; 0.55)  | 8.6×10 <sup>-1</sup>   | None      | 1            | Wald     |             |
|                   |             | DBP (mmHg)                      | 0.11 (-0.23; 0.46)   | 5.2×10 <sup>-1</sup>   | None      | 1            | Wald     |             |
|                   |             | ECG heart rate (exercise) (BPM) | -1.16 (-1.89; -0.44) | 1.7×10 <sup>-3</sup>   | 0.501     | 2            | IWW      |             |
|                   |             | ECG load (exercise) (Watts)     | -0.74 (-1.55; 0.07)  | 7.5×10 <sup>-2</sup>   | 0.612     | 2            | IWW      |             |
|                   |             | Asthma (OR)                     | 1.04 (0.99; 1.09)    | 1.4×10 <sup>-1</sup>   | 0.415     | 2            | IWW      |             |
|                   |             | CRP (log(mg/L))                 | 0.07 (-0.01; 0.15)   | 8.9×10 <sup>-2</sup>   | None      | 1            | Wald     |             |
|                   |             | eGFR (SD of log(eGFR))          | 0.01 (0.01; 0.02)    | 2.0×10 <sup>-4</sup>   | None      | 1            | Wald     |             |
|                   |             | BUN (mg/dl)                     | -0.00 (-0.02; 0.01)  | 6.2×10 <sup>-1</sup>   | None      | 1            | Wald     |             |
|                   |             | CKD (OR)                        | 0.90 (0.75; 1.09)    | 2.8×10 <sup>-1</sup>   | None      | 1            | Wald     |             |
|                   |             | Alzheimer's (OR)                | 1.04 (1.01; 1.08)    | 7.5×10 <sup>-3</sup>   | 0.549     | 2            | IWW      |             |
|                   |             | Parkinson's (OR)                | 0.94 (0.64; 1.37)    | 7.4×10 <sup>-1</sup>   | None      | 1            | Wald     |             |
|                   |             | Lewy body dementia (OR)         | 1.69 (1.22; 2.34)    | 1.7×10 <sup>-3</sup>   | 0.976     | 2            | IWW      |             |
|                   |             | Breast cancer (OR)              | 1.11 (1.01; 1.21)    | 3.8×10 <sup>-2</sup>   | 0.324     | 2            | IWW      |             |
|                   |             | Lung cancer (OR)                | 0.84 (0.64; 1.09)    | 1.9×10 <sup>-1</sup>   | 0.695     | 2            | IWW      |             |
|                   |             | Colon cancer (OR)               | 1.30 (1.06; 1.59)    | 1.1×10 <sup>-2</sup>   | 0.824     | 2            | IWW      |             |
|                   |             | Prostate cancer (OR)            | 1.23 (1.08; 1.40)    | 1.4×10 <sup>-3</sup>   | 0.948     | 2            | IWW      |             |
| TGDF1 (P13385)    | Druggable   | HF (OR)                         | 0.98 (0.98; 0.99)    | 3.1×10 <sup>-4</sup>   | 0.019     | 42           | MR Egger | Interval    |
|                   |             | Non-ischemic CM (OR)            | 0.93 (0.92; 0.94)    | 1.0×10 <sup>-100</sup> | <0.001    | 47           | IWW      |             |
|                   |             | DCM (OR)                        | 1.01 (0.97; 1.06)    | 5.6×10 <sup>-1</sup>   | 0.002     | 43           | MR Egger |             |
|                   |             | AF (OR)                         | 1.01 (1.01; 1.01)    | 2.8×10 <sup>-10</sup>  | 0.081     | 49           | IWW      |             |
|                   |             | CHD (OR)                        | 0.99 (0.99; 1.00)    | 1.1×10 <sup>-6</sup>   | 0.002     | 44           | IWW      |             |
|                   |             | cIMT (mm)                       | -0.00 (-0.00; -0.00) | 1.3×10 <sup>-11</sup>  | 0.007     | 48           | MR Egger |             |
|                   |             | Carotid plaque (OR)             | 0.98 (0.97; 0.99)    | 7.6×10 <sup>-6</sup>   | 0.003     | 41           | IWW      |             |
|                   |             | Any stroke (OR)                 | 0.99 (0.99; 1.00)    | 7.2×10 <sup>-2</sup>   | 0.006     | 34           | IWW      |             |
|                   |             | Any ischemic stroke (OR)        | 1.01 (1.00; 1.01)    | 1.2×10 <sup>-1</sup>   | 0.013     | 35           | IWW      |             |
|                   |             | LDL cholesterol (mmol/l)        | 0.00 (0.00; 0.00)    | 4.7×10 <sup>-2</sup>   | 0.016     | 50           | MR Egger |             |
|                   |             | Apolipoprotein B (g/l)          | 0.00 (-0.00; 0.00)   | 1.1×10 <sup>-1</sup>   | <0.001    | 55           | MR Egger |             |
|                   |             | Triglycerides (mmol/l)          | 0.00 (-0.00; 0.00)   | 2.9×10 <sup>-1</sup>   | <0.001    | 40           | IWW      |             |
|                   |             | Cholesterol (mmol/l)            | 0.00 (-0.00; 0.00)   | 6.2×10 <sup>-1</sup>   | <0.001    | 51           | MR Egger |             |
|                   |             | HDL cholesterol (mmol/l)        | -0.00 (-0.00; -0.00) | 2.7×10 <sup>-8</sup>   | <0.001    | 45           | IWW      |             |
|                   |             | Apolipoprotein A1 (g/l)         | -0.00 (-0.00; -0.00) | 1.9×10 <sup>-11</sup>  | <0.001    | 44           | IWW      |             |
|                   |             | Glucose (mmol/l)                | 0.00 (0.00; 0.01)    | 2.2×10 <sup>-4</sup>   | 0.562     | 40           | IWW      |             |
|                   |             | Glycated haemoglobin (mmol/mol) | 0.00 (-0.01; 0.01)   | 3.8×10 <sup>-1</sup>   | <0.001    | 38           | IWW      |             |
|                   |             | T2DM (OR)                       | 0.99 (0.98; 0.99)    | 8.5×10 <sup>-4</sup>   | <0.001    | 37           | MR Egger |             |
|                   |             | BMI (SD)                        | -0.00 (-0.01; 0.00)  | 1.9×10 <sup>-1</sup>   | <0.001    | 26           | MR Egger |             |
|                   |             | SBP (mmHg)                      | -0.07 (-0.12; -0.02) | 2.6×10 <sup>-3</sup>   | <0.001    | 25           | MR Egger |             |
|                   |             | DBP (mmHg)                      | -0.04 (-0.06; -0.02) | 9.9×10 <sup>-4</sup>   | <0.001    | 29           | MR Egger |             |
|                   |             | ECG heart rate (exercise) (BPM) | 0.02 (-0.04; 0.08)   | 4.5×10 <sup>-1</sup>   | <0.001    | 48           | IWW      |             |
|                   |             | ECG load (exercise) (Watts)     | 0.07 (-0.00; 0.13)   | 5.2×10 <sup>-2</sup>   | <0.001    | 48           | IWW      |             |
|                   |             | Asthma (OR)                     | 0.99 (0.99; 0.99)    | 8.1×10 <sup>-6</sup>   | <0.001    | 53           | MR Egger |             |
|                   |             | CRP (log(mg/L))                 | -0.00 (-0.00; 0.00)  | 2.0×10 <sup>-1</sup>   | 0.107     | 51           | IWW      |             |
|                   |             | eGFR (SD of log(eGFR))          | -0.00 (-0.00; 0.00)  | 9.3×10 <sup>-2</sup>   | 0.006     | 48           | MR Egger |             |
|                   |             | BUN (mg/dl)                     | 0.00 (-0.00; 0.00)   | 1.7×10 <sup>-1</sup>   | 0.007     | 43           | MR Egger |             |
|                   |             | CKD (OR)                        | 1.00 (1.00; 1.01)    | 2.7×10 <sup>-1</sup>   | <0.001    | 45           | MR Egger |             |
|                   |             | Alzheimer's (OR)                | 1.00 (1.00; 1.00)    | 1.0×10 <sup>-100</sup> | 0.039     | 48           | IWW      |             |
|                   |             | Parkinson's (OR)                | 1.00 (0.99; 1.01)    | 9.8×10 <sup>-1</sup>   | 0.002     | 34           | IWW      |             |
|                   |             | Lewy body dementia (OR)         | 0.99 (0.94; 1.03)    | 4.8×10 <sup>-1</sup>   | 0.006     | 38           | MR Egger |             |
|                   |             | Breast cancer (OR)              | 1.01 (0.99; 1.02)    | 4.6×10 <sup>-1</sup>   | <0.001    | 46           | MR Egger |             |
|                   |             | Lung cancer (OR)                | 1.05 (1.01; 1.08)    | 3.9×10 <sup>-3</sup>   | <0.001    | 52           | MR Egger |             |
|                   |             | Colon cancer (OR)               | 1.00 (0.97; 1.04)    | 8.0×10 <sup>-1</sup>   | 0.053     | 49           | MR Egger |             |
|                   |             | Prostate cancer (OR)            | 1.01 (1.00; 1.03)    | 8.5×10 <sup>-3</sup>   | <0.001    | 43           | IWW      |             |
| TGFB2 (P61812)    | Druggable   | HF (OR)                         | 1.07 (0.91; 1.25)    | 4.0×10 <sup>-1</sup>   | None      | 1            | Wald     | Interval    |
|                   |             | Non-ischemic CM (OR)            | 1.22 (0.63; 2.39)    | 5.5×10 <sup>-1</sup>   | None      | 1            | Wald     |             |

**Table S16:** Phenome-wide drug target MR scan of proteins with a prioritized CMR association. (*continued*)

| Protein (uniprot) | Protein set | Trait                           | Estimate (95%CI)     | P-value                | Q p-value | No. Variants | MR model | PQTL source |
|-------------------|-------------|---------------------------------|----------------------|------------------------|-----------|--------------|----------|-------------|
|                   |             | DCM (OR)                        | 0.57 (0.27; 1.20)    | 1.4×10 <sup>-1</sup>   | None      | 1            | Wald     |             |
|                   |             | AF (OR)                         | 1.23 (1.07; 1.40)    | 2.5×10 <sup>-3</sup>   | None      | 1            | Wald     |             |
|                   |             | CHD (OR)                        | 1.00 (0.86; 1.16)    | 1.0×10 <sup>0</sup>    | None      | 1            | Wald     |             |
|                   |             | clMT (mm)                       | 0.01 (-0.00; 0.03)   | 1.0×10 <sup>-1</sup>   | None      | 1            | Wald     |             |
|                   |             | Carotid plaque (OR)             | 1.04 (0.75; 1.43)    | 8.2×10 <sup>-1</sup>   | None      | 1            | Wald     |             |
|                   |             | Any stroke (OR)                 | 1.27 (1.06; 1.53)    | 9.8×10 <sup>-3</sup>   | None      | 1            | Wald     |             |
|                   |             | Any ischemic stroke (OR)        | 1.26 (1.03; 1.55)    | 2.3×10 <sup>-2</sup>   | None      | 1            | Wald     |             |
|                   |             | LDL cholesterol (mmol/l)        | -0.02 (-0.04; -0.00) | 1.4×10 <sup>-2</sup>   | 0.664     | 2            | IWV      |             |
|                   |             | Apolipoprotein B (g/l)          | -0.01 (-0.01; -0.00) | 4.8×10 <sup>-3</sup>   | 0.658     | 2            | IWV      |             |
|                   |             | Triglycerides (mmol/l)          | 0.02 (-0.00; 0.04)   | 9.0×10 <sup>-2</sup>   | 0.831     | 2            | IWV      |             |
|                   |             | Cholesterol (mmol/l)            | -0.03 (-0.06; -0.00) | 2.0×10 <sup>-2</sup>   | 0.866     | 2            | IWV      |             |
|                   |             | HDL cholesterol (mmol/l)        | -0.01 (-0.02; -0.00) | 4.3×10 <sup>-2</sup>   | 0.337     | 2            | IWV      |             |
|                   |             | Apolipoprotein A1 (g/l)         | -0.00 (-0.01; 0.01)  | 9.4×10 <sup>-1</sup>   | 0.266     | 2            | IWV      |             |
|                   |             | Glucose (mmol/l)                | 0.04 (0.01; 0.07)    | 7.2×10 <sup>-3</sup>   | 0.486     | 2            | IWV      |             |
|                   |             | Glycated haemoglobin (mmol/mol) | 0.20 (-0.01; 0.41)   | 5.8×10 <sup>-2</sup>   | 0.152     | 2            | IWV      |             |
|                   |             | T2DM (OR)                       | 1.20 (1.06; 1.37)    | 4.7×10 <sup>-3</sup>   | None      | 1            | Wald     |             |
|                   |             | BMI (SD)                        | 0.01 (-0.03; 0.04)   | 6.4×10 <sup>-1</sup>   | None      | 1            | Wald     |             |
|                   |             | SBP (mmHg)                      | -0.95 (-1.55; -0.34) | 2.1×10 <sup>-3</sup>   | None      | 1            | Wald     |             |
|                   |             | DBP (mmHg)                      | -0.37 (-0.72; -0.03) | 3.5×10 <sup>-2</sup>   | None      | 1            | Wald     |             |
|                   |             | ECG heart rate (exercise) (BPM) | -0.09 (-0.92; 0.74)  | 8.3×10 <sup>-1</sup>   | 0.380     | 2            | IWV      |             |
|                   |             | ECG load (exercise) (Watts)     | -0.44 (-1.37; 0.49)  | 3.5×10 <sup>-1</sup>   | 0.854     | 2            | IWV      |             |
|                   |             | Asthma (OR)                     | 0.87 (0.83; 0.92)    | 1.7×10 <sup>-6</sup>   | 0.872     | 2            | IWV      |             |
|                   |             | CRP (log(mg/L))                 | 0.06 (-0.02; 0.14)   | 1.7×10 <sup>-1</sup>   | None      | 1            | Wald     |             |
|                   |             | eGFR (SD of log(eGFR))          | 0.00 (-0.00; 0.01)   | 2.1×10 <sup>-1</sup>   | None      | 1            | Wald     |             |
|                   |             | BUN (mg/dl)                     | -0.00 (-0.02; 0.02)  | 7.8×10 <sup>-1</sup>   | None      | 1            | Wald     |             |
|                   |             | CKD (OR)                        | 0.87 (0.71; 1.05)    | 1.5×10 <sup>-1</sup>   | None      | 1            | Wald     |             |
|                   |             | Alzheimer's (OR)                | 1.05 (1.01; 1.09)    | 1.0×10 <sup>-2</sup>   | None      | 1            | Wald     |             |
|                   |             | Parkinson's (OR)                | 0.69 (0.45; 1.07)    | 9.7×10 <sup>-2</sup>   | None      | 1            | Wald     |             |
|                   |             | Lewy body dementia (OR)         | 1.38 (0.66; 2.89)    | 3.9×10 <sup>-1</sup>   | None      | 1            | Wald     |             |
|                   |             | Breast cancer (OR)              | 1.09 (0.97; 1.22)    | 1.4×10 <sup>-1</sup>   | 0.801     | 2            | IWV      |             |
|                   |             | Lung cancer (OR)                | 0.83 (0.62; 1.13)    | 2.4×10 <sup>-1</sup>   | 0.942     | 2            | IWV      |             |
|                   |             | Colon cancer (OR)               | 1.42 (1.13; 1.79)    | 2.7×10 <sup>-3</sup>   | 0.778     | 2            | IWV      |             |
|                   |             | Prostate cancer (OR)            | 0.81 (0.70; 0.94)    | 6.0×10 <sup>-3</sup>   | 0.362     | 2            | IWV      |             |
| TLR4 (O00206)     | Druggable   | HF (OR)                         | 0.97 (0.96; 0.99)    | 2.8×10 <sup>-3</sup>   | 0.295     | 14           | IWV      | Interval    |
|                   |             | Non-ischemic CM (OR)            | 0.95 (0.81; 1.12)    | 5.5×10 <sup>-1</sup>   | 0.363     | 18           | MR Egger |             |
|                   |             | DCM (OR)                        | 1.12 (1.03; 1.23)    | 1.0×10 <sup>-2</sup>   | 0.313     | 17           | IWV      |             |
|                   |             | AF (OR)                         | 0.97 (0.95; 0.99)    | 8.6×10 <sup>-4</sup>   | 0.032     | 18           | IWV      |             |
|                   |             | CHD (OR)                        | 1.00 (0.96; 1.04)    | 8.9×10 <sup>-1</sup>   | 0.241     | 17           | MR Egger |             |
|                   |             | clMT (mm)                       | -0.00 (-0.00; 0.00)  | 1.0×10 <sup>-1</sup>   | 0.608     | 15           | IWV      |             |
|                   |             | Carotid plaque (OR)             | 0.99 (0.95; 1.03)    | 7.1×10 <sup>-1</sup>   | 0.146     | 15           | IWV      |             |
|                   |             | Any stroke (OR)                 | 0.96 (0.93; 0.98)    | 3.8×10 <sup>-4</sup>   | 0.135     | 15           | IWV      |             |
|                   |             | Any ischemic stroke (OR)        | 0.95 (0.93; 0.97)    | 7.3×10 <sup>-7</sup>   | 0.667     | 15           | IWV      |             |
|                   |             | LDL cholesterol (mmol/l)        | -0.00 (-0.01; 0.00)  | 3.4×10 <sup>-1</sup>   | <0.001    | 17           | IWV      |             |
|                   |             | Apolipoprotein B (g/l)          | -0.00 (-0.00; -0.00) | 1.4×10 <sup>-2</sup>   | <0.001    | 19           | IWV      |             |
|                   |             | Triglycerides (mmol/l)          | -0.01 (-0.02; -0.01) | 1.4×10 <sup>-4</sup>   | 0.530     | 17           | IWV      |             |
|                   |             | Cholesterol (mmol/l)            | -0.01 (-0.02; -0.01) | 9.1×10 <sup>-5</sup>   | <0.001    | 18           | IWV      |             |
|                   |             | HDL cholesterol (mmol/l)        | -0.01 (-0.01; -0.00) | 1.5×10 <sup>-2</sup>   | 0.469     | 18           | MR Egger |             |
|                   |             | Apolipoprotein A1 (g/l)         | -0.00 (-0.00; -0.00) | 4.3×10 <sup>-4</sup>   | 0.573     | 19           | IWV      |             |
|                   |             | Glucose (mmol/l)                | -0.02 (-0.03; -0.01) | 1.3×10 <sup>-10</sup>  | 0.031     | 19           | IWV      |             |
|                   |             | Glycated haemoglobin (mmol/mol) | -0.09 (-0.14; -0.05) | 2.9×10 <sup>-5</sup>   | 0.216     | 18           | IWV      |             |
|                   |             | T2DM (OR)                       | 0.96 (0.95; 0.97)    | 2.3×10 <sup>-10</sup>  | 0.705     | 16           | IWV      |             |
|                   |             | BMI (SD)                        | 0.01 (-0.00; 0.02)   | 2.1×10 <sup>-1</sup>   | 0.011     | 14           | MR Egger |             |
|                   |             | SBP (mmHg)                      | -0.00 (-0.15; 0.14)  | 9.9×10 <sup>-1</sup>   | 0.414     | 17           | MR Egger |             |
|                   |             | DBP (mmHg)                      | 0.05 (-0.05; 0.15)   | 3.5×10 <sup>-1</sup>   | 0.066     | 17           | MR Egger |             |
|                   |             | ECG heart rate (exercise) (BPM) | 0.10 (-0.35; 0.56)   | 6.6×10 <sup>-1</sup>   | 0.484     | 18           | MR Egger |             |
|                   |             | ECG load (exercise) (Watts)     | 1.05 (0.83; 1.27)    | 1.0×10 <sup>-100</sup> | 0.004     | 18           | IWV      |             |
|                   |             | Asthma (OR)                     | 0.97 (0.94; 1.00)    | 5.9×10 <sup>-2</sup>   | 0.978     | 17           | MR Egger |             |
|                   |             | CRP (log(mg/L))                 | 0.02 (0.01; 0.03)    | 2.6×10 <sup>-3</sup>   | 0.148     | 14           | IWV      |             |
|                   |             | eGFR (SD of log(eGFR))          | -0.00 (-0.00; 0.00)  | 3.4×10 <sup>-1</sup>   | 0.562     | 18           | MR Egger |             |
|                   |             | BUN (mg/dl)                     | -0.01 (-0.01; -0.00) | 4.5×10 <sup>-11</sup>  | 0.333     | 15           | IWV      |             |
|                   |             | CKD (OR)                        | 0.97 (0.95; 0.99)    | 4.2×10 <sup>-3</sup>   | <0.001    | 16           | IWV      |             |
|                   |             | Alzheimer's (OR)                | 1.00 (0.99; 1.00)    | 6.2×10 <sup>-1</sup>   | 0.090     | 17           | IWV      |             |
|                   |             | Parkinson's (OR)                | 0.96 (0.91; 1.01)    | 1.2×10 <sup>-1</sup>   | 0.136     | 16           | IWV      |             |
|                   |             | Lewy body dementia (OR)         | 0.93 (0.73; 1.20)    | 5.8×10 <sup>-1</sup>   | 0.361     | 13           | MR Egger |             |
|                   |             | Breast cancer (OR)              | 0.98 (0.91; 1.05)    | 5.4×10 <sup>-1</sup>   | 0.094     | 17           | MR Egger |             |
|                   |             | Lung cancer (OR)                | 0.94 (0.88; 1.01)    | 7.4×10 <sup>-2</sup>   | 0.663     | 18           | IWV      |             |

**Table S16:** Phenome-wide drug target MR scan of proteins with a prioritized CMR association. (*continued*)

| Protein (uniprot)       | Protein set       | Trait                           | Estimate (95%CI)     | P-value                | Q p-value | No. Variants | MR model | PQTL source |
|-------------------------|-------------------|---------------------------------|----------------------|------------------------|-----------|--------------|----------|-------------|
| TNF12 (O43508)          | Druggable         | Colon cancer (OR)               | 1.01 (0.96; 1.08)    | $6.4 \times 10^{-1}$   | 0.712     | 14           | IVW      | Interval    |
|                         |                   | Prostate cancer (OR)            | 0.99 (0.91; 1.06)    | $7.0 \times 10^{-1}$   | 0.045     | 16           | MR Egger |             |
|                         |                   | HF (OR)                         | 0.87 (0.82; 0.93)    | $5.6 \times 10^{-5}$   | 0.017     | 13           | MR Egger |             |
|                         |                   | Non-ischemic CM (OR)            | 0.82 (0.77; 0.88)    | $4.4 \times 10^{-8}$   | 0.030     | 13           | IVW      |             |
|                         |                   | DCM (OR)                        | 0.80 (0.75; 0.85)    | $3.1 \times 10^{-13}$  | 0.976     | 14           | IVW      |             |
|                         |                   | AF (OR)                         | 0.90 (0.89; 0.91)    | $1.0 \times 10^{-100}$ | 0.006     | 15           | IVW      |             |
|                         |                   | CHD (OR)                        | 0.89 (0.82; 0.95)    | $1.4 \times 10^{-3}$   | 0.018     | 14           | MR Egger |             |
|                         |                   | cIMT (mm)                       | 0.00 (-0.00; 0.00)   | $4.0 \times 10^{-1}$   | <0.001    | 14           | IVW      |             |
|                         |                   | Carotid plaque (OR)             | 0.94 (0.92; 0.97)    | $6.2 \times 10^{-5}$   | 0.190     | 15           | IVW      |             |
|                         |                   | Any stroke (OR)                 | 0.96 (0.95; 0.97)    | $1.1 \times 10^{-9}$   | 0.003     | 15           | IVW      |             |
|                         |                   | Any ischemic stroke (OR)        | 0.96 (0.94; 0.98)    | $3.7 \times 10^{-6}$   | 0.008     | 13           | IVW      |             |
|                         |                   | LDL cholesterol (mmol/l)        | -0.01 (-0.01; -0.01) | $2.5 \times 10^{-9}$   | 0.026     | 9            | IVW      |             |
|                         |                   | Apolipoprotein B (g/l)          | -0.00 (-0.01; -0.00) | $1.0 \times 10^{-100}$ | <0.001    | 9            | IVW      |             |
|                         |                   | Triglycerides (mmol/l)          | -0.02 (-0.03; -0.02) | $1.0 \times 10^{-100}$ | <0.001    | 11           | IVW      |             |
|                         |                   | Cholesterol (mmol/l)            | 0.06 (0.04; 0.07)    | $3.4 \times 10^{-11}$  | 0.031     | 11           | MR Egger |             |
|                         |                   | HDL cholesterol (mmol/l)        | 0.01 (0.00; 0.01)    | $1.9 \times 10^{-10}$  | <0.001    | 10           | IVW      |             |
|                         |                   | Apolipoprotein A1 (g/l)         | 0.02 (0.01; 0.03)    | $6.2 \times 10^{-6}$   | 0.183     | 9            | MR Egger |             |
|                         |                   | Glucose (mmol/l)                | -0.01 (-0.03; 0.00)  | $1.3 \times 10^{-1}$   | 0.007     | 15           | MR Egger |             |
|                         |                   | Glycated haemoglobin (mmol/mol) | -0.25 (-0.28; -0.22) | $1.0 \times 10^{-100}$ | 0.002     | 11           | IVW      |             |
|                         |                   | T2DM (OR)                       | 0.95 (0.94; 0.96)    | $1.8 \times 10^{-13}$  | 0.017     | 12           | IVW      |             |
|                         |                   | BMI (SD)                        | 0.00 (-0.01; 0.02)   | $5.6 \times 10^{-1}$   | 0.011     | 13           | MR Egger |             |
|                         |                   | SBP (mmHg)                      | 1.44 (1.13; 1.74)    | $1.0 \times 10^{-100}$ | <0.001    | 8            | MR Egger |             |
|                         |                   | DBP (mmHg)                      | 0.16 (0.12; 0.19)    | $1.0 \times 10^{-100}$ | <0.001    | 8            | IVW      |             |
|                         |                   | ECG heart rate (exercise) (BPM) | -0.81 (-0.94; -0.67) | $1.0 \times 10^{-100}$ | 0.255     | 16           | IVW      |             |
|                         |                   | ECG load (exercise) (Watts)     | -0.69 (-0.83; -0.55) | $1.0 \times 10^{-100}$ | 0.002     | 16           | IVW      |             |
|                         |                   | Asthma (OR)                     | 0.93 (0.92; 0.94)    | $1.0 \times 10^{-100}$ | <0.001    | 13           | IVW      |             |
|                         |                   | CRP (log(mg/L))                 | 0.02 (0.01; 0.02)    | $1.2 \times 10^{-9}$   | 0.024     | 15           | IVW      |             |
|                         |                   | eGFR (SD of log(eGFR))          | 0.00 (0.00; 0.00)    | $7.9 \times 10^{-12}$  | 0.012     | 10           | IVW      |             |
|                         |                   | BUN (mg/dl)                     | -0.00 (-0.01; -0.00) | $2.0 \times 10^{-4}$   | 0.840     | 11           | IVW      |             |
|                         |                   | CKD (OR)                        | 0.96 (0.95; 0.98)    | $3.9 \times 10^{-6}$   | <0.001    | 13           | IVW      |             |
|                         |                   | Alzheimer's (OR)                | 1.00 (1.00; 1.01)    | $1.5 \times 10^{-2}$   | 0.028     | 14           | IVW      |             |
|                         |                   | Parkinson's (OR)                | 0.99 (0.84; 1.17)    | $9.0 \times 10^{-1}$   | 0.034     | 12           | MR Egger |             |
| Lewy body dementia (OR) | 1.11 (1.06; 1.16) | $1.9 \times 10^{-5}$            | 0.844                | 13                     | IVW       |              |          |             |
| Breast cancer (OR)      | 1.34 (1.21; 1.48) | $3.2 \times 10^{-8}$            | 0.025                | 13                     | MR Egger  |              |          |             |
| Lung cancer (OR)        | 1.37 (1.01; 1.87) | $4.6 \times 10^{-2}$            | 0.191                | 13                     | MR Egger  |              |          |             |
| Colon cancer (OR)       | 1.02 (0.97; 1.07) | $4.0 \times 10^{-1}$            | 0.139                | 13                     | IVW       |              |          |             |
| Prostate cancer (OR)    | 0.82 (0.62; 1.08) | $1.6 \times 10^{-1}$            | 0.115                | 10                     | MR Egger  |              |          |             |
| TNRS5 (P25942)          | Druggable         | HF (OR)                         | 0.98 (0.98; 0.99)    | $2.0 \times 10^{-3}$   | <0.001    | 45           | IVW      | Scallop     |
|                         |                   | Non-ischemic CM (OR)            | 0.92 (0.89; 0.96)    | $9.1 \times 10^{-5}$   | 0.006     | 48           | IVW      |             |
|                         |                   | DCM (OR)                        | 1.22 (1.12; 1.33)    | $6.1 \times 10^{-6}$   | <0.001    | 48           | MR Egger |             |
|                         |                   | AF (OR)                         | 0.95 (0.93; 0.98)    | $1.0 \times 10^{-4}$   | 0.004     | 45           | MR Egger |             |
|                         |                   | CHD (OR)                        | 1.03 (1.02; 1.05)    | $3.6 \times 10^{-5}$   | <0.001    | 35           | IVW      |             |
|                         |                   | cIMT (mm)                       | 0.00 (-0.00; 0.00)   | $1.2 \times 10^{-1}$   | <0.001    | 44           | IVW      |             |
|                         |                   | Carotid plaque (OR)             | 1.05 (1.03; 1.07)    | $4.4 \times 10^{-5}$   | 0.008     | 42           | IVW      |             |
|                         |                   | Any stroke (OR)                 | 0.92 (0.91; 0.93)    | $1.0 \times 10^{-100}$ | <0.001    | 45           | IVW      |             |
|                         |                   | Any ischemic stroke (OR)        | 0.91 (0.90; 0.92)    | $1.0 \times 10^{-100}$ | 0.081     | 42           | IVW      |             |
|                         |                   | LDL cholesterol (mmol/l)        | 0.01 (-0.00; 0.01)   | $1.3 \times 10^{-1}$   | <0.001    | 39           | MR Egger |             |
|                         |                   | Apolipoprotein B (g/l)          | 0.01 (0.00; 0.01)    | $1.9 \times 10^{-4}$   | <0.001    | 22           | MR Egger |             |
|                         |                   | Triglycerides (mmol/l)          | 0.01 (-0.00; 0.03)   | $1.4 \times 10^{-1}$   | <0.001    | 18           | MR Egger |             |
|                         |                   | Cholesterol (mmol/l)            | 0.02 (0.01; 0.03)    | $1.5 \times 10^{-5}$   | <0.001    | 44           | MR Egger |             |
|                         |                   | HDL cholesterol (mmol/l)        | 0.01 (-0.00; 0.01)   | $9.7 \times 10^{-2}$   | <0.001    | 22           | MR Egger |             |
|                         |                   | Apolipoprotein A1 (g/l)         | 0.00 (0.00; 0.01)    | $1.1 \times 10^{-9}$   | <0.001    | 33           | IVW      |             |
|                         |                   | Glucose (mmol/l)                | -0.01 (-0.01; -0.00) | $2.9 \times 10^{-2}$   | <0.001    | 47           | IVW      |             |
|                         |                   | Glycated haemoglobin (mmol/mol) | 0.20 (0.11; 0.28)    | $4.3 \times 10^{-6}$   | <0.001    | 36           | MR Egger |             |
|                         |                   | T2DM (OR)                       | 0.96 (0.95; 0.97)    | $1.0 \times 10^{-100}$ | <0.001    | 45           | IVW      |             |
|                         |                   | BMI (SD)                        | -0.01 (-0.02; -0.01) | $4.4 \times 10^{-16}$  | <0.001    | 39           | IVW      |             |
|                         |                   | SBP (mmHg)                      | -0.09 (-0.18; -0.00) | $4.7 \times 10^{-2}$   | <0.001    | 37           | MR Egger |             |
|                         |                   | DBP (mmHg)                      | 0.01 (-0.03; 0.06)   | $6.1 \times 10^{-1}$   | <0.001    | 37           | MR Egger |             |
|                         |                   | ECG heart rate (exercise) (BPM) | -0.46 (-0.60; -0.31) | $6.0 \times 10^{-10}$  | <0.001    | 43           | IVW      |             |
|                         |                   | ECG load (exercise) (Watts)     | -1.11 (-1.44; -0.77) | $7.3 \times 10^{-11}$  | 0.299     | 46           | MR Egger |             |
|                         |                   | Asthma (OR)                     | 1.06 (1.04; 1.08)    | $1.1 \times 10^{-7}$   | <0.001    | 43           | MR Egger |             |
|                         |                   | CRP (log(mg/L))                 | 0.01 (-0.00; 0.02)   | $1.7 \times 10^{-1}$   | <0.001    | 44           | MR Egger |             |
|                         |                   | eGFR (SD of log(eGFR))          | 0.00 (0.00; 0.00)    | $4.5 \times 10^{-3}$   | <0.001    | 49           | IVW      |             |
|                         |                   | BUN (mg/dl)                     | -0.00 (-0.00; -0.00) | $1.7 \times 10^{-2}$   | 0.003     | 43           | MR Egger |             |
|                         |                   | CKD (OR)                        | 0.97 (0.95; 0.99)    | $6.4 \times 10^{-3}$   | <0.001    | 47           | MR Egger |             |
|                         |                   | Alzheimer's (OR)                | 1.00 (0.99; 1.01)    | $9.5 \times 10^{-1}$   | 0.016     | 48           | MR Egger |             |

**Table S16:** Phenome-wide drug target MR scan of proteins with a prioritized CMR association. (*continued*)

| Protein (uniprot) | Protein set | Trait                           | Estimate (95%CI)     | P-value               | Q p-value | No. Variants | MR model | PQTL source |
|-------------------|-------------|---------------------------------|----------------------|-----------------------|-----------|--------------|----------|-------------|
|                   |             | Parkinson's (OR)                | 0.90 (0.85; 0.96)    | 1.6×10 <sup>-3</sup>  | 0.055     | 46           | MR Egger |             |
|                   |             | Lewy body dementia (OR)         | 1.07 (0.98; 1.17)    | 1.5×10 <sup>-1</sup>  | 0.121     | 46           | MR Egger |             |
|                   |             | Breast cancer (OR)              | 1.09 (1.04; 1.14)    | 3.0×10 <sup>-4</sup>  | <0.001    | 39           | MR Egger |             |
|                   |             | Lung cancer (OR)                | 1.18 (1.11; 1.26)    | 2.9×10 <sup>-7</sup>  | 0.064     | 39           | IVW      |             |
|                   |             | Colon cancer (OR)               | 1.05 (0.98; 1.14)    | 1.8×10 <sup>-1</sup>  | <0.001    | 45           | MR Egger |             |
|                   |             | Prostate cancer (OR)            | 1.01 (0.99; 1.03)    | 4.8×10 <sup>-1</sup>  | 0.008     | 46           | IVW      |             |
| TR10B (O14763)    | Druggable   | HF (OR)                         | 0.97 (0.93; 1.02)    | 2.9×10 <sup>-1</sup>  | 0.015     | 33           | MR Egger | Scallop     |
|                   |             | Non-ischemic CM (OR)            | 1.14 (0.91; 1.45)    | 2.6×10 <sup>-1</sup>  | 0.106     | 33           | MR Egger |             |
|                   |             | DCM (OR)                        | 1.12 (1.02; 1.24)    | 1.9×10 <sup>-2</sup>  | <0.001    | 30           | IVW      |             |
|                   |             | AF (OR)                         | 1.01 (0.99; 1.02)    | 3.4×10 <sup>-1</sup>  | 0.417     | 41           | IVW      |             |
|                   |             | CHD (OR)                        | 1.04 (0.99; 1.09)    | 1.1×10 <sup>-1</sup>  | 0.321     | 36           | MR Egger |             |
|                   |             | clMT (mm)                       | 0.01 (0.00; 0.01)    | 5.4×10 <sup>-9</sup>  | 0.075     | 32           | IVW      |             |
|                   |             | Carotid plaque (OR)             | 1.06 (1.03; 1.10)    | 5.8×10 <sup>-4</sup>  | 0.382     | 38           | IVW      |             |
|                   |             | Any stroke (OR)                 | 0.93 (0.89; 0.98)    | 8.1×10 <sup>-3</sup>  | 0.679     | 37           | MR Egger |             |
|                   |             | Any ischemic stroke (OR)        | 0.95 (0.90; 1.01)    | 9.5×10 <sup>-2</sup>  | 0.849     | 37           | MR Egger |             |
|                   |             | LDL cholesterol (mmol/l)        | 0.00 (-0.00; 0.01)   | 6.9×10 <sup>-1</sup>  | 0.308     | 36           | IVW      |             |
|                   |             | Apolipoprotein B (g/l)          | -0.00 (-0.00; 0.00)  | 2.8×10 <sup>-1</sup>  | 0.127     | 36           | IVW      |             |
|                   |             | Triglycerides (mmol/l)          | 0.00 (-0.01; 0.02)   | 6.6×10 <sup>-1</sup>  | <0.001    | 35           | MR Egger |             |
|                   |             | Cholesterol (mmol/l)            | 0.00 (-0.00; 0.01)   | 2.7×10 <sup>-1</sup>  | 0.023     | 35           | IVW      |             |
|                   |             | HDL cholesterol (mmol/l)        | 0.00 (0.00; 0.01)    | 6.1×10 <sup>-3</sup>  | 0.004     | 35           | IVW      |             |
|                   |             | Apolipoprotein A1 (g/l)         | -0.00 (-0.01; 0.00)  | 7.4×10 <sup>-1</sup>  | 0.107     | 38           | MR Egger |             |
|                   |             | Glucose (mmol/l)                | -0.02 (-0.03; -0.01) | 9.0×10 <sup>-7</sup>  | <0.001    | 34           | IVW      |             |
|                   |             | Glycated haemoglobin (mmol/mol) | -0.16 (-0.20; -0.11) | 9.2×10 <sup>-11</sup> | 0.162     | 35           | IVW      |             |
|                   |             | T2DM (OR)                       | 0.95 (0.94; 0.96)    | 2.5×10 <sup>-13</sup> | <0.001    | 36           | IVW      |             |
|                   |             | BMI (SD)                        | -0.01 (-0.01; -0.00) | 1.3×10 <sup>-3</sup>  | 0.008     | 34           | IVW      |             |
|                   |             | SBP (mmHg)                      | 0.08 (0.00; 0.16)    | 4.8×10 <sup>-2</sup>  | 0.052     | 32           | IVW      |             |
|                   |             | DBP (mmHg)                      | 0.05 (0.00; 0.09)    | 4.5×10 <sup>-2</sup>  | 0.086     | 33           | IVW      |             |
|                   |             | ECG heart rate (exercise) (BPM) | 0.23 (0.00; 0.46)    | 4.9×10 <sup>-2</sup>  | 0.013     | 36           | IVW      |             |
|                   |             | ECG load (exercise) (Watts)     | 0.28 (0.02; 0.53)    | 3.2×10 <sup>-2</sup>  | 0.187     | 40           | IVW      |             |
|                   |             | Asthma (OR)                     | 0.91 (0.88; 0.94)    | 1.9×10 <sup>-8</sup>  | <0.001    | 38           | MR Egger |             |
|                   |             | CRP (log(mg/L))                 | -0.03 (-0.05; -0.01) | 1.1×10 <sup>-2</sup>  | <0.001    | 36           | MR Egger |             |
|                   |             | eGFR (SD of log(eGFR))          | 0.00 (-0.00; 0.00)   | 7.7×10 <sup>-1</sup>  | 0.115     | 34           | MR Egger |             |
|                   |             | BUN (mg/dl)                     | -0.00 (-0.01; 0.00)  | 6.3×10 <sup>-1</sup>  | 0.073     | 33           | MR Egger |             |
|                   |             | CKD (OR)                        | 1.00 (0.95; 1.05)    | 9.2×10 <sup>-1</sup>  | 0.017     | 36           | MR Egger |             |
|                   |             | Alzheimer's (OR)                | 0.99 (0.98; 1.00)    | 1.7×10 <sup>-1</sup>  | <0.001    | 33           | MR Egger |             |
|                   |             | Parkinson's (OR)                | 1.04 (0.91; 1.19)    | 5.4×10 <sup>-1</sup>  | 0.066     | 34           | MR Egger |             |
|                   |             | Lewy body dementia (OR)         | 0.85 (0.67; 1.09)    | 2.0×10 <sup>-1</sup>  | 0.012     | 32           | MR Egger |             |
|                   |             | Breast cancer (OR)              | 1.00 (0.93; 1.06)    | 9.0×10 <sup>-1</sup>  | 0.603     | 38           | MR Egger |             |
|                   |             | Lung cancer (OR)                | 0.73 (0.61; 0.86)    | 2.4×10 <sup>-4</sup>  | 0.825     | 38           | MR Egger |             |
|                   |             | Colon cancer (OR)               | 1.00 (0.86; 1.15)    | 9.8×10 <sup>-1</sup>  | 0.232     | 36           | MR Egger |             |
|                   |             | Prostate cancer (OR)            | 0.89 (0.86; 0.93)    | 5.6×10 <sup>-10</sup> | <0.001    | 35           | IVW      |             |
| ASAH2 (Q9NR71)    | Concordant  | HF (OR)                         | 1.00 (0.97; 1.03)    | 9.9×10 <sup>-1</sup>  | 0.800     | 19           | MR Egger | Interval    |
|                   |             | Non-ischemic CM (OR)            | 0.96 (0.90; 1.01)    | 1.4×10 <sup>-1</sup>  | 0.148     | 21           | IVW      |             |
|                   |             | DCM (OR)                        | 1.08 (0.94; 1.25)    | 2.6×10 <sup>-1</sup>  | 0.612     | 19           | MR Egger |             |
|                   |             | AF (OR)                         | 1.00 (0.99; 1.02)    | 8.5×10 <sup>-1</sup>  | 0.054     | 22           | IVW      |             |
|                   |             | CHD (OR)                        | 1.00 (0.98; 1.03)    | 7.4×10 <sup>-1</sup>  | 0.544     | 22           | MR Egger |             |
|                   |             | clMT (mm)                       | 0.00 (0.00; 0.01)    | 3.8×10 <sup>-8</sup>  | 0.218     | 19           | IVW      |             |
|                   |             | Carotid plaque (OR)             | 1.05 (1.02; 1.09)    | 2.3×10 <sup>-3</sup>  | 0.134     | 17           | IVW      |             |
|                   |             | Any stroke (OR)                 | 0.97 (0.96; 0.99)    | 3.2×10 <sup>-4</sup>  | 0.476     | 19           | IVW      |             |
|                   |             | Any ischemic stroke (OR)        | 0.97 (0.95; 0.99)    | 5.7×10 <sup>-4</sup>  | 0.023     | 20           | IVW      |             |
|                   |             | LDL cholesterol (mmol/l)        | -0.02 (-0.02; -0.01) | 6.3×10 <sup>-10</sup> | 0.738     | 21           | MR Egger |             |
|                   |             | Apolipoprotein B (g/l)          | -0.00 (-0.01; -0.00) | 4.0×10 <sup>-11</sup> | 0.615     | 21           | MR Egger |             |
|                   |             | Triglycerides (mmol/l)          | -0.01 (-0.02; -0.01) | 3.1×10 <sup>-4</sup>  | 0.041     | 21           | MR Egger |             |
|                   |             | Cholesterol (mmol/l)            | -0.01 (-0.02; -0.01) | 2.1×10 <sup>-5</sup>  | 0.884     | 21           | MR Egger |             |
|                   |             | HDL cholesterol (mmol/l)        | -0.00 (-0.00; -0.00) | 2.1×10 <sup>-5</sup>  | 0.013     | 22           | IVW      |             |
|                   |             | Apolipoprotein A1 (g/l)         | 0.00 (-0.00; 0.00)   | 8.5×10 <sup>-1</sup>  | 0.027     | 23           | IVW      |             |
|                   |             | Glucose (mmol/l)                | -0.01 (-0.01; -0.00) | 4.7×10 <sup>-5</sup>  | 0.396     | 24           | IVW      |             |
|                   |             | Glycated haemoglobin (mmol/mol) | -0.03 (-0.07; 0.01)  | 1.7×10 <sup>-1</sup>  | 0.259     | 22           | MR Egger |             |
|                   |             | T2DM (OR)                       | 1.00 (0.99; 1.01)    | 8.7×10 <sup>-1</sup>  | 0.324     | 19           | IVW      |             |
|                   |             | BMI (SD)                        | -0.00 (-0.01; 0.00)  | 3.1×10 <sup>-1</sup>  | 0.231     | 15           | MR Egger |             |
|                   |             | SBP (mmHg)                      | 0.01 (-0.13; 0.14)   | 9.4×10 <sup>-1</sup>  | 0.467     | 16           | MR Egger |             |
|                   |             | DBP (mmHg)                      | 0.02 (-0.05; 0.10)   | 5.8×10 <sup>-1</sup>  | 0.418     | 18           | MR Egger |             |
|                   |             | ECG heart rate (exercise) (BPM) | 0.03 (-0.06; 0.12)   | 5.0×10 <sup>-1</sup>  | <0.001    | 22           | IVW      |             |
|                   |             | ECG load (exercise) (Watts)     | 0.23 (-0.00; 0.46)   | 5.2×10 <sup>-2</sup>  | 0.431     | 22           | MR Egger |             |
|                   |             | Asthma (OR)                     | 0.96 (0.95; 0.98)    | 1.3×10 <sup>-6</sup>  | 0.265     | 23           | MR Egger |             |
|                   |             | CRP (log(mg/L))                 | -0.00 (-0.03; 0.02)  | 7.2×10 <sup>-1</sup>  | 0.107     | 18           | MR Egger |             |

**Table S16:** Phenome-wide drug target MR scan of proteins with a prioritized CMR association. (*continued*)

| Protein (uniprot) | Protein set | Trait                           | Estimate (95%CI)     | P-value                | Q p-value | No. Variants | MR model | PQTL source |
|-------------------|-------------|---------------------------------|----------------------|------------------------|-----------|--------------|----------|-------------|
|                   |             | eGFR (SD of log(eGFR))          | 0.00 (-0.00; 0.00)   | 9.2×10 <sup>-1</sup>   | 0.138     | 16           | MR Egger |             |
|                   |             | BUN (mg/dl)                     | -0.00 (-0.01; 0.00)  | 2.2×10 <sup>-1</sup>   | 0.572     | 18           | MR Egger |             |
|                   |             | CKD (OR)                        | 1.03 (1.00; 1.06)    | 2.2×10 <sup>-2</sup>   | 0.185     | 16           | IWV      |             |
|                   |             | Alzheimer's (OR)                | 1.00 (0.99; 1.00)    | 8.4×10 <sup>-1</sup>   | 0.021     | 17           | IWV      |             |
|                   |             | Parkinson's (OR)                | 0.92 (0.88; 0.97)    | 9.0×10 <sup>-4</sup>   | 0.114     | 17           | IWV      |             |
|                   |             | Lewy body dementia (OR)         | 0.93 (0.88; 0.99)    | 1.6×10 <sup>-2</sup>   | 0.045     | 18           | IWV      |             |
|                   |             | Breast cancer (OR)              | 0.99 (0.97; 1.02)    | 5.4×10 <sup>-1</sup>   | 0.012     | 17           | IWV      |             |
|                   |             | Lung cancer (OR)                | 1.05 (0.98; 1.13)    | 1.5×10 <sup>-1</sup>   | 0.092     | 20           | IWV      |             |
|                   |             | Colon cancer (OR)               | 0.95 (0.91; 1.00)    | 4.2×10 <sup>-2</sup>   | 0.008     | 18           | IWV      |             |
|                   |             | Prostate cancer (OR)            | 0.94 (0.90; 0.97)    | 4.9×10 <sup>-4</sup>   | 0.127     | 18           | IWV      |             |
| ASM3A (Q92484)    | Concordant  | HF (OR)                         | 0.98 (0.95; 1.01)    | 2.0×10 <sup>-1</sup>   | 0.023     | 26           | MR Egger | Interval    |
|                   |             | Non-ischemic CM (OR)            | 0.94 (0.90; 0.98)    | 6.3×10 <sup>-3</sup>   | 0.197     | 31           | IWV      |             |
|                   |             | DCM (OR)                        | 1.04 (0.99; 1.10)    | 1.3×10 <sup>-1</sup>   | 0.422     | 31           | IWV      |             |
|                   |             | AF (OR)                         | 1.02 (1.01; 1.03)    | 1.0×10 <sup>-4</sup>   | 0.040     | 27           | IWV      |             |
|                   |             | CHD (OR)                        | 0.99 (0.98; 1.00)    | 5.6×10 <sup>-2</sup>   | 0.416     | 27           | IWV      |             |
|                   |             | clMT (mm)                       | 0.00 (-0.00; 0.00)   | 1.1×10 <sup>-1</sup>   | <0.001    | 29           | IWV      |             |
|                   |             | Carotid plaque (OR)             | 1.01 (0.98; 1.03)    | 5.5×10 <sup>-1</sup>   | 0.367     | 29           | IWV      |             |
|                   |             | Any stroke (OR)                 | 0.99 (0.97; 1.01)    | 4.3×10 <sup>-1</sup>   | 0.390     | 26           | IWV      |             |
|                   |             | Any ischemic stroke (OR)        | 1.01 (0.98; 1.03)    | 5.1×10 <sup>-1</sup>   | 0.394     | 24           | IWV      |             |
|                   |             | LDL cholesterol (mmol/l)        | 0.00 (-0.00; 0.00)   | 7.2×10 <sup>-1</sup>   | 0.104     | 39           | IWV      |             |
|                   |             | Apolipoprotein B (g/l)          | -0.00 (-0.00; 0.00)  | 2.2×10 <sup>-1</sup>   | 0.350     | 39           | IWV      |             |
|                   |             | Triglycerides (mmol/l)          | 0.00 (-0.00; 0.00)   | 1.2×10 <sup>-1</sup>   | 0.029     | 37           | IWV      |             |
|                   |             | Cholesterol (mmol/l)            | 0.00 (-0.00; 0.00)   | 1.5×10 <sup>-1</sup>   | 0.038     | 39           | IWV      |             |
|                   |             | HDL cholesterol (mmol/l)        | 0.00 (-0.00; 0.00)   | 5.5×10 <sup>-1</sup>   | 0.393     | 34           | MR Egger |             |
|                   |             | Apolipoprotein A1 (g/l)         | -0.00 (-0.00; 0.00)  | 9.8×10 <sup>-1</sup>   | 0.311     | 35           | MR Egger |             |
|                   |             | Glucose (mmol/l)                | -0.00 (-0.01; 0.01)  | 8.1×10 <sup>-1</sup>   | 0.002     | 30           | MR Egger |             |
|                   |             | Glycated haemoglobin (mmol/mol) | -0.04 (-0.06; -0.02) | 3.9×10 <sup>-7</sup>   | <0.001    | 38           | IWV      |             |
|                   |             | T2DM (OR)                       | 0.99 (0.98; 1.00)    | 1.5×10 <sup>-1</sup>   | 0.185     | 31           | IWV      |             |
|                   |             | BMI (SD)                        | 0.01 (0.01; 0.01)    | 1.2×10 <sup>-11</sup>  | 0.010     | 30           | IWV      |             |
|                   |             | SBP (mmHg)                      | 0.04 (-0.01; 0.08)   | 9.2×10 <sup>-2</sup>   | <0.001    | 28           | IWV      |             |
|                   |             | DBP (mmHg)                      | 0.05 (-0.01; 0.11)   | 1.3×10 <sup>-1</sup>   | 0.100     | 27           | MR Egger |             |
|                   |             | ECG heart rate (exercise) (BPM) | 0.32 (0.07; 0.57)    | 1.2×10 <sup>-2</sup>   | 0.362     | 37           | MR Egger |             |
|                   |             | ECG load (exercise) (Watts)     | 0.17 (-0.15; 0.49)   | 3.0×10 <sup>-1</sup>   | 0.062     | 39           | MR Egger |             |
|                   |             | Asthma (OR)                     | 1.02 (1.01; 1.03)    | 2.5×10 <sup>-8</sup>   | 0.059     | 39           | IWV      |             |
|                   |             | CRP (log(mg/L))                 | -0.02 (-0.03; 0.00)  | 1.1×10 <sup>-1</sup>   | 0.760     | 30           | MR Egger |             |
|                   |             | eGFR (SD of log(eGFR))          | 0.00 (-0.00; 0.00)   | 4.8×10 <sup>-1</sup>   | 0.191     | 32           | IWV      |             |
|                   |             | BUN (mg/dl)                     | -0.00 (-0.00; 0.00)  | 2.0×10 <sup>-1</sup>   | 0.004     | 29           | IWV      |             |
|                   |             | CKD (OR)                        | 0.97 (0.93; 1.00)    | 6.5×10 <sup>-2</sup>   | 0.873     | 30           | MR Egger |             |
|                   |             | Alzheimer's (OR)                | 1.01 (1.00; 1.02)    | 7.0×10 <sup>-4</sup>   | <0.001    | 33           | MR Egger |             |
|                   |             | Parkinson's (OR)                | 0.95 (0.88; 1.01)    | 1.1×10 <sup>-1</sup>   | 0.012     | 30           | MR Egger |             |
|                   |             | Lewy body dementia (OR)         | 1.02 (0.91; 1.15)    | 7.4×10 <sup>-1</sup>   | 0.119     | 28           | MR Egger |             |
|                   |             | Breast cancer (OR)              | 1.06 (0.99; 1.13)    | 7.8×10 <sup>-2</sup>   | 0.018     | 26           | MR Egger |             |
|                   |             | Lung cancer (OR)                | 0.93 (0.79; 1.10)    | 3.9×10 <sup>-1</sup>   | 0.571     | 31           | MR Egger |             |
|                   |             | Colon cancer (OR)               | 0.95 (0.93; 0.98)    | 1.5×10 <sup>-3</sup>   | 0.029     | 31           | IWV      |             |
|                   |             | Prostate cancer (OR)            | 0.99 (0.97; 1.01)    | 1.9×10 <sup>-1</sup>   | 0.260     | 33           | IWV      |             |
| BAG3 (O95817)     | Concordant  | HF (OR)                         | 0.75 (0.72; 0.79)    | 1.0×10 <sup>-100</sup> | 0.900     | 5            | IWV      | Interval    |
|                   |             | Non-ischemic CM (OR)            | 0.30 (0.25; 0.36)    | 1.0×10 <sup>-100</sup> | 0.481     | 5            | IWV      |             |
|                   |             | DCM (OR)                        | 0.14 (0.11; 0.17)    | 1.0×10 <sup>-100</sup> | 0.032     | 4            | IWV      |             |
|                   |             | AF (OR)                         | 1.01 (0.96; 1.07)    | 6.3×10 <sup>-1</sup>   | 0.135     | 5            | IWV      |             |
|                   |             | CHD (OR)                        | 0.97 (0.92; 1.03)    | 3.4×10 <sup>-1</sup>   | 0.217     | 5            | IWV      |             |
|                   |             | clMT (mm)                       | 0.00 (-0.00; 0.01)   | 9.5×10 <sup>-2</sup>   | 0.581     | 5            | IWV      |             |
|                   |             | Carotid plaque (OR)             | 1.16 (1.03; 1.30)    | 1.3×10 <sup>-2</sup>   | 0.126     | 5            | IWV      |             |
|                   |             | Any stroke (OR)                 | 1.18 (0.87; 1.62)    | 2.9×10 <sup>-1</sup>   | 0.749     | 5            | MR Egger |             |
|                   |             | Any ischemic stroke (OR)        | 1.11 (0.79; 1.56)    | 5.5×10 <sup>-1</sup>   | 0.490     | 5            | MR Egger |             |
|                   |             | LDL cholesterol (mmol/l)        | -0.08 (-0.14; -0.01) | 1.6×10 <sup>-2</sup>   | 0.919     | 5            | MR Egger |             |
|                   |             | Apolipoprotein B (g/l)          | -0.03 (-0.04; -0.01) | 4.4×10 <sup>-3</sup>   | 0.826     | 5            | MR Egger |             |
|                   |             | Triglycerides (mmol/l)          | -0.01 (-0.03; 0.01)  | 3.0×10 <sup>-1</sup>   | 0.122     | 5            | IWV      |             |
|                   |             | Cholesterol (mmol/l)            | -0.09 (-0.17; -0.01) | 2.9×10 <sup>-2</sup>   | 0.736     | 5            | MR Egger |             |
|                   |             | HDL cholesterol (mmol/l)        | 0.02 (0.01; 0.02)    | 4.2×10 <sup>-7</sup>   | 0.109     | 5            | IWV      |             |
|                   |             | Apolipoprotein A1 (g/l)         | -0.00 (-0.02; 0.02)  | 9.3×10 <sup>-1</sup>   | 0.881     | 5            | MR Egger |             |
|                   |             | Glucose (mmol/l)                | 0.01 (-0.00; 0.03)   | 7.6×10 <sup>-2</sup>   | 0.921     | 5            | IWV      |             |
|                   |             | Glycated haemoglobin (mmol/mol) | -0.05 (-0.14; 0.05)  | 3.3×10 <sup>-1</sup>   | 0.262     | 5            | IWV      |             |
|                   |             | T2DM (OR)                       | 0.89 (0.86; 0.92)    | 9.0×10 <sup>-13</sup>  | 0.448     | 5            | IWV      |             |
|                   |             | BMI (SD)                        | 0.02 (0.01; 0.03)    | 3.3×10 <sup>-4</sup>   | 0.011     | 5            | IWV      |             |
|                   |             | SBP (mmHg)                      | -0.97 (-1.13; -0.82) | 1.0×10 <sup>-100</sup> | 0.017     | 5            | IWV      |             |
|                   |             | DBP (mmHg)                      | -1.12 (-1.23; -1.02) | 1.0×10 <sup>-100</sup> | 0.017     | 4            | IWV      |             |



**Table S16:** Phenome-wide drug target MR scan of proteins with a prioritized CMR association. (*continued*)

| Protein (uniprot) | Protein set | Trait                           | Estimate (95%CI)     | P-value                | Q p-value | No. Variants | MR model | PQTL source |
|-------------------|-------------|---------------------------------|----------------------|------------------------|-----------|--------------|----------|-------------|
|                   |             | ECG heart rate (exercise) (BPM) | -0.42 (-0.88; 0.04)  | 7.6×10 <sup>-2</sup>   | 0.447     | 5            | IWV      |             |
|                   |             | ECG load (exercise) (Watts)     | 0.03 (-0.74; 0.81)   | 9.3×10 <sup>-1</sup>   | 0.062     | 5            | IWV      |             |
|                   |             | Asthma (OR)                     | 1.01 (0.98; 1.04)    | 6.9×10 <sup>-1</sup>   | 0.466     | 5            | IWV      |             |
|                   |             | CRP (log(mg/L))                 | 0.01 (-0.01; 0.03)   | 3.5×10 <sup>-1</sup>   | 0.334     | 5            | IWV      |             |
|                   |             | eGFR (SD of log(eGFR))          | 0.00 (-0.00; 0.00)   | 5.7×10 <sup>-1</sup>   | 0.071     | 5            | IWV      |             |
|                   |             | BUN (mg/dl)                     | -0.00 (-0.01; 0.00)  | 7.4×10 <sup>-1</sup>   | 0.310     | 5            | IWV      |             |
|                   |             | CKD (OR)                        | 1.06 (1.00; 1.11)    | 5.3×10 <sup>-2</sup>   | 0.345     | 5            | IWV      |             |
|                   |             | Alzheimer's (OR)                | 0.99 (0.97; 1.01)    | 4.6×10 <sup>-1</sup>   | 0.066     | 5            | IWV      |             |
|                   |             | Parkinson's (OR)                | 1.56 (1.42; 1.70)    | 1.0×10 <sup>-100</sup> | 0.008     | 5            | IWV      |             |
|                   |             | Lewy body dementia (OR)         | 1.18 (0.91; 1.54)    | 2.1×10 <sup>-1</sup>   | 0.403     | 4            | IWV      |             |
|                   |             | Breast cancer (OR)              | 0.96 (0.91; 1.03)    | 2.5×10 <sup>-1</sup>   | 0.996     | 5            | IWV      |             |
|                   |             | Lung cancer (OR)                | 0.85 (0.73; 1.00)    | 5.0×10 <sup>-2</sup>   | 0.485     | 5            | IWV      |             |
|                   |             | Colon cancer (OR)               | 1.37 (1.19; 1.58)    | 1.9×10 <sup>-5</sup>   | 0.266     | 5            | IWV      |             |
|                   |             | Prostate cancer (OR)            | 1.10 (1.02; 1.19)    | 1.4×10 <sup>-2</sup>   | 0.768     | 5            | IWV      |             |
| BGH3 (Q15582)     | Concordant  | HF (OR)                         | 1.01 (1.00; 1.02)    | 7.3×10 <sup>-2</sup>   | 0.482     | 16           | IWV      | Interval    |
|                   |             | Non-ischemic CM (OR)            | 0.96 (0.91; 1.01)    | 8.0×10 <sup>-2</sup>   | 0.321     | 16           | IWV      |             |
|                   |             | DCM (OR)                        | 0.79 (0.53; 1.17)    | 2.4×10 <sup>-1</sup>   | 0.946     | 16           | MR Egger |             |
|                   |             | AF (OR)                         | 0.98 (0.97; 0.99)    | 2.7×10 <sup>-6</sup>   | 0.842     | 16           | IWV      |             |
|                   |             | CHD (OR)                        | 0.98 (0.90; 1.07)    | 6.2×10 <sup>-1</sup>   | 0.703     | 16           | MR Egger |             |
|                   |             | cIMT (mm)                       | 0.01 (-0.00; 0.01)   | 8.4×10 <sup>-2</sup>   | 0.569     | 16           | MR Egger |             |
|                   |             | Carotid plaque (OR)             | 1.02 (1.00; 1.05)    | 9.9×10 <sup>-2</sup>   | 0.586     | 15           | IWV      |             |
|                   |             | Any stroke (OR)                 | 1.02 (1.00; 1.04)    | 1.3×10 <sup>-2</sup>   | 0.085     | 16           | IWV      |             |
|                   |             | Any ischemic stroke (OR)        | 1.01 (0.99; 1.02)    | 5.0×10 <sup>-1</sup>   | 0.619     | 16           | IWV      |             |
|                   |             | LDL cholesterol (mmol/l)        | 0.02 (0.01; 0.02)    | 1.0×10 <sup>-100</sup> | 0.079     | 18           | IWV      |             |
|                   |             | Apolipoprotein B (g/l)          | 0.00 (0.00; 0.00)    | 1.0×10 <sup>-100</sup> | 0.222     | 18           | IWV      |             |
|                   |             | Triglycerides (mmol/l)          | -0.02 (-0.04; 0.00)  | 5.7×10 <sup>-2</sup>   | 0.242     | 19           | MR Egger |             |
|                   |             | Cholesterol (mmol/l)            | 0.02 (0.02; 0.02)    | 1.0×10 <sup>-100</sup> | 0.009     | 19           | IWV      |             |
|                   |             | HDL cholesterol (mmol/l)        | 0.00 (0.00; 0.01)    | 7.2×10 <sup>-7</sup>   | 0.015     | 14           | IWV      |             |
|                   |             | Apolipoprotein A1 (g/l)         | 0.00 (0.00; 0.00)    | 6.8×10 <sup>-4</sup>   | 0.051     | 15           | IWV      |             |
|                   |             | Glucose (mmol/l)                | -0.01 (-0.01; -0.01) | 7.0×10 <sup>-7</sup>   | 0.321     | 19           | IWV      |             |
|                   |             | Glycated haemoglobin (mmol/mol) | -0.06 (-0.08; -0.04) | 2.8×10 <sup>-8</sup>   | 0.951     | 19           | IWV      |             |
|                   |             | T2DM (OR)                       | 0.96 (0.95; 0.97)    | 1.0×10 <sup>-100</sup> | <0.001    | 16           | IWV      |             |
|                   |             | BMI (SD)                        | -0.01 (-0.01; -0.00) | 2.1×10 <sup>-4</sup>   | 0.745     | 15           | IWV      |             |
|                   |             | SBP (mmHg)                      | -0.08 (-0.41; 0.26)  | 6.5×10 <sup>-1</sup>   | 0.316     | 15           | MR Egger |             |
|                   |             | DBP (mmHg)                      | 0.02 (-0.16; 0.20)   | 8.4×10 <sup>-1</sup>   | 0.586     | 15           | MR Egger |             |
|                   |             | ECG heart rate (exercise) (BPM) | -0.36 (-1.07; 0.35)  | 3.2×10 <sup>-1</sup>   | 0.430     | 19           | MR Egger |             |
|                   |             | ECG load (exercise) (Watts)     | 0.33 (-0.46; 1.12)   | 4.2×10 <sup>-1</sup>   | 0.562     | 19           | MR Egger |             |
|                   |             | Asthma (OR)                     | 1.05 (1.00; 1.10)    | 5.0×10 <sup>-2</sup>   | 0.019     | 18           | MR Egger |             |
|                   |             | CRP (log(mg/L))                 | -0.01 (-0.01; 0.00)  | 7.5×10 <sup>-2</sup>   | 0.127     | 16           | IWV      |             |
|                   |             | eGFR (SD of log(eGFR))          | 0.00 (-0.00; 0.00)   | 8.6×10 <sup>-1</sup>   | 0.751     | 14           | IWV      |             |
|                   |             | BUN (mg/dl)                     | -0.01 (-0.01; -0.01) | 1.0×10 <sup>-100</sup> | 0.498     | 16           | IWV      |             |
|                   |             | CKD (OR)                        | 1.00 (0.99; 1.02)    | 6.4×10 <sup>-1</sup>   | 0.846     | 16           | IWV      |             |
|                   |             | Alzheimer's (OR)                | 1.00 (1.00; 1.01)    | 2.8×10 <sup>-2</sup>   | 0.668     | 15           | IWV      |             |
|                   |             | Parkinson's (OR)                | 1.08 (0.84; 1.38)    | 5.7×10 <sup>-1</sup>   | 0.225     | 16           | MR Egger |             |
|                   |             | Lewy body dementia (OR)         | 0.92 (0.88; 0.97)    | 2.8×10 <sup>-3</sup>   | 0.720     | 14           | IWV      |             |
|                   |             | Breast cancer (OR)              | 1.01 (0.90; 1.14)    | 8.6×10 <sup>-1</sup>   | 0.320     | 15           | MR Egger |             |
|                   |             | Lung cancer (OR)                | 1.00 (0.95; 1.06)    | 9.7×10 <sup>-1</sup>   | 0.144     | 15           | IWV      |             |
|                   |             | Colon cancer (OR)               | 1.01 (0.80; 1.28)    | 9.1×10 <sup>-1</sup>   | 0.772     | 14           | MR Egger |             |
|                   |             | Prostate cancer (OR)            | 1.00 (0.86; 1.17)    | 9.6×10 <sup>-1</sup>   | 0.346     | 15           | MR Egger |             |
| BSSP4 (Q9GZ4)     | Concordant  | HF (OR)                         | 1.01 (0.95; 1.09)    | 6.9×10 <sup>-1</sup>   | 0.767     | 14           | MR Egger | Interval    |
|                   |             | Non-ischemic CM (OR)            | 1.01 (0.93; 1.10)    | 7.6×10 <sup>-1</sup>   | 0.751     | 15           | IWV      |             |
|                   |             | DCM (OR)                        | 0.97 (0.71; 1.33)    | 8.5×10 <sup>-1</sup>   | 0.789     | 14           | MR Egger |             |
|                   |             | AF (OR)                         | 1.04 (0.97; 1.10)    | 2.6×10 <sup>-1</sup>   | 0.096     | 16           | MR Egger |             |
|                   |             | CHD (OR)                        | 1.00 (0.98; 1.02)    | 9.4×10 <sup>-1</sup>   | 0.998     | 18           | IWV      |             |
|                   |             | cIMT (mm)                       | -0.00 (-0.01; 0.00)  | 2.6×10 <sup>-1</sup>   | 0.599     | 13           | MR Egger |             |
|                   |             | Carotid plaque (OR)             | 1.00 (0.86; 1.15)    | 9.5×10 <sup>-1</sup>   | 0.752     | 13           | MR Egger |             |
|                   |             | Any stroke (OR)                 | 0.95 (0.92; 0.97)    | 1.1×10 <sup>-4</sup>   | 0.012     | 15           | IWV      |             |
|                   |             | Any ischemic stroke (OR)        | 0.90 (0.83; 0.98)    | 2.1×10 <sup>-2</sup>   | 0.330     | 14           | MR Egger |             |
|                   |             | LDL cholesterol (mmol/l)        | -0.00 (-0.02; 0.01)  | 7.1×10 <sup>-1</sup>   | 0.331     | 18           | MR Egger |             |
|                   |             | Apolipoprotein B (g/l)          | -0.01 (-0.01; -0.00) | 4.3×10 <sup>-3</sup>   | 0.212     | 19           | MR Egger |             |
|                   |             | Triglycerides (mmol/l)          | -0.00 (-0.02; 0.02)  | 9.7×10 <sup>-1</sup>   | 0.423     | 18           | MR Egger |             |
|                   |             | Cholesterol (mmol/l)            | -0.00 (-0.02; 0.01)  | 7.1×10 <sup>-1</sup>   | 0.233     | 19           | MR Egger |             |
|                   |             | HDL cholesterol (mmol/l)        | 0.00 (0.00; 0.01)    | 3.2×10 <sup>-5</sup>   | 0.176     | 17           | IWV      |             |
|                   |             | Apolipoprotein A1 (g/l)         | 0.01 (0.00; 0.01)    | 3.1×10 <sup>-5</sup>   | 0.491     | 19           | MR Egger |             |
|                   |             | Glucose (mmol/l)                | -0.01 (-0.03; 0.01)  | 1.7×10 <sup>-1</sup>   | 0.387     | 19           | MR Egger |             |
|                   |             | Glycated haemoglobin (mmol/mol) | -0.03 (-0.14; 0.08)  | 5.7×10 <sup>-1</sup>   | 0.066     | 19           | MR Egger |             |

**Table S16:** Phenome-wide drug target MR scan of proteins with a prioritized CMR association. (*continued*)

| Protein (uniprot) | Protein set | Trait                           | Estimate (95%CI)     | P-value                | Q p-value | No. Variants | MR model | PQTL source |
|-------------------|-------------|---------------------------------|----------------------|------------------------|-----------|--------------|----------|-------------|
|                   |             | T2DM (OR)                       | 0.98 (0.93; 1.04)    | 5.7×10 <sup>-1</sup>   | 0.045     | 13           | MR Egger |             |
|                   |             | BMI (SD)                        | 0.01 (-0.02; 0.03)   | 6.0×10 <sup>-1</sup>   | 0.161     | 12           | MR Egger |             |
|                   |             | SBP (mmHg)                      | -0.12 (-0.21; -0.03) | 6.2×10 <sup>-3</sup>   | 0.496     | 13           | IVW      |             |
|                   |             | DBP (mmHg)                      | -0.05 (-0.26; 0.15)  | 6.0×10 <sup>-1</sup>   | 0.122     | 11           | MR Egger |             |
|                   |             | ECG heart rate (exercise) (BPM) | 0.82 (0.20; 1.45)    | 9.9×10 <sup>-3</sup>   | 0.065     | 19           | MR Egger |             |
|                   |             | ECG load (exercise) (Watts)     | 0.08 (-0.08; 0.24)   | 3.1×10 <sup>-1</sup>   | 0.517     | 18           | IVW      |             |
|                   |             | Asthma (OR)                     | None                 | None                   | None      | None         | None     |             |
|                   |             | CRP (log(mg/L))                 | 0.04 (0.02; 0.05)    | 1.1×10 <sup>-7</sup>   | 0.627     | 13           | IVW      |             |
|                   |             | eGFR (SD of log(eGFR))          | -0.00 (-0.01; 0.00)  | 6.9×10 <sup>-1</sup>   | 0.084     | 12           | MR Egger |             |
|                   |             | BUN (mg/dl)                     | -0.01 (-0.02; -0.00) | 5.0×10 <sup>-2</sup>   | 0.526     | 13           | MR Egger |             |
|                   |             | CKD (OR)                        | 0.97 (0.94; 0.99)    | 1.0×10 <sup>-2</sup>   | 0.806     | 13           | IVW      |             |
|                   |             | Alzheimer's (OR)                | 1.01 (0.99; 1.03)    | 3.0×10 <sup>-1</sup>   | 0.839     | 15           | MR Egger |             |
|                   |             | Parkinson's (OR)                | 0.83 (0.67; 1.01)    | 6.7×10 <sup>-2</sup>   | 0.010     | 13           | MR Egger |             |
|                   |             | Lewy body dementia (OR)         | 1.23 (0.87; 1.72)    | 2.4×10 <sup>-1</sup>   | 0.707     | 14           | MR Egger |             |
|                   |             | Breast cancer (OR)              | 0.99 (0.96; 1.01)    | 3.5×10 <sup>-1</sup>   | 0.460     | 14           | IVW      |             |
|                   |             | Lung cancer (OR)                | 0.98 (0.91; 1.06)    | 6.4×10 <sup>-1</sup>   | 0.476     | 13           | IVW      |             |
|                   |             | Colon cancer (OR)               | 0.98 (0.92; 1.03)    | 3.9×10 <sup>-1</sup>   | 0.398     | 15           | IVW      |             |
|                   |             | Prostate cancer (OR)            | 1.11 (0.99; 1.26)    | 7.8×10 <sup>-2</sup>   | 0.013     | 14           | MR Egger |             |
| C1QC (P02747)     | Concordant  | HF (OR)                         | 0.97 (0.96; 0.98)    | 1.5×10 <sup>-7</sup>   | 0.002     | 36           | IVW      | Interval    |
|                   |             | Non-ischemic CM (OR)            | 0.95 (0.85; 1.07)    | 4.3×10 <sup>-1</sup>   | 0.032     | 38           | MR Egger |             |
|                   |             | DCM (OR)                        | 0.86 (0.82; 0.90)    | 5.2×10 <sup>-11</sup>  | 0.044     | 40           | IVW      |             |
|                   |             | AF (OR)                         | 0.97 (0.95; 1.00)    | 2.6×10 <sup>-2</sup>   | 0.026     | 42           | MR Egger |             |
|                   |             | CHD (OR)                        | 0.98 (0.96; 1.01)    | 2.7×10 <sup>-1</sup>   | 0.040     | 37           | MR Egger |             |
|                   |             | ciMT (mm)                       | -0.00 (-0.00; 0.00)  | 7.6×10 <sup>-1</sup>   | 0.021     | 37           | MR Egger |             |
|                   |             | Carotid plaque (OR)             | 1.05 (1.03; 1.08)    | 3.2×10 <sup>-7</sup>   | 0.584     | 38           | IVW      |             |
|                   |             | Any stroke (OR)                 | 1.01 (1.00; 1.02)    | 4.5×10 <sup>-2</sup>   | 0.459     | 38           | IVW      |             |
|                   |             | Any ischemic stroke (OR)        | 0.98 (0.95; 1.02)    | 3.7×10 <sup>-1</sup>   | 0.129     | 41           | MR Egger |             |
|                   |             | LDL cholesterol (mmol/l)        | -0.00 (-0.01; 0.00)  | 2.7×10 <sup>-1</sup>   | 0.008     | 43           | MR Egger |             |
|                   |             | Apolipoprotein B (g/l)          | -0.00 (-0.00; 0.00)  | 1.2×10 <sup>-1</sup>   | 0.010     | 43           | MR Egger |             |
|                   |             | Triglycerides (mmol/l)          | -0.00 (-0.01; 0.00)  | 3.4×10 <sup>-1</sup>   | 0.530     | 43           | MR Egger |             |
|                   |             | Cholesterol (mmol/l)            | -0.00 (-0.01; 0.01)  | 8.0×10 <sup>-1</sup>   | 0.004     | 43           | MR Egger |             |
|                   |             | HDL cholesterol (mmol/l)        | 0.00 (0.00; 0.01)    | 4.7×10 <sup>-2</sup>   | 0.495     | 39           | MR Egger |             |
|                   |             | Apolipoprotein A1 (g/l)         | 0.00 (0.00; 0.00)    | 4.3×10 <sup>-2</sup>   | 0.269     | 39           | MR Egger |             |
|                   |             | Glucose (mmol/l)                | -0.00 (-0.01; 0.01)  | 5.0×10 <sup>-1</sup>   | 0.023     | 39           | MR Egger |             |
|                   |             | Glycated haemoglobin (mmol/mol) | -0.01 (-0.03; 0.00)  | 1.3×10 <sup>-1</sup>   | 0.033     | 41           | IVW      |             |
|                   |             | T2DM (OR)                       | 1.01 (0.99; 1.03)    | 3.8×10 <sup>-1</sup>   | <0.001    | 41           | MR Egger |             |
|                   |             | BMI (SD)                        | -0.01 (-0.02; -0.00) | 6.9×10 <sup>-3</sup>   | 0.216     | 36           | MR Egger |             |
|                   |             | SBP (mmHg)                      | -0.12 (-0.16; -0.07) | 2.1×10 <sup>-7</sup>   | <0.001    | 33           | IVW      |             |
|                   |             | DBP (mmHg)                      | -0.08 (-0.11; -0.05) | 4.7×10 <sup>-7</sup>   | 0.253     | 28           | IVW      |             |
|                   |             | ECG heart rate (exercise) (BPM) | 0.21 (-0.07; 0.50)   | 1.4×10 <sup>-1</sup>   | 0.086     | 43           | MR Egger |             |
|                   |             | ECG load (exercise) (Watts)     | -0.06 (-0.38; 0.26)  | 7.3×10 <sup>-1</sup>   | 0.014     | 41           | MR Egger |             |
|                   |             | Asthma (OR)                     | 1.00 (0.99; 1.01)    | 5.4×10 <sup>-1</sup>   | <0.001    | 37           | IVW      |             |
|                   |             | CRP (log(mg/L))                 | -0.01 (-0.01; -0.00) | 1.1×10 <sup>-2</sup>   | 0.002     | 40           | IVW      |             |
|                   |             | eGFR (SD of log(eGFR))          | 0.00 (-0.00; 0.00)   | 3.0×10 <sup>-1</sup>   | 0.015     | 39           | IVW      |             |
|                   |             | BUN (mg/dl)                     | -0.00 (-0.00; -0.00) | 1.1×10 <sup>-2</sup>   | 0.025     | 36           | IVW      |             |
|                   |             | CKD (OR)                        | 1.02 (1.01; 1.04)    | 5.3×10 <sup>-5</sup>   | 0.045     | 36           | IVW      |             |
|                   |             | Alzheimer's (OR)                | 1.00 (1.00; 1.01)    | 2.5×10 <sup>-1</sup>   | 0.013     | 41           | MR Egger |             |
|                   |             | Parkinson's (OR)                | 1.01 (0.95; 1.08)    | 7.3×10 <sup>-1</sup>   | 0.013     | 38           | MR Egger |             |
|                   |             | Lewy body dementia (OR)         | 1.01 (0.90; 1.14)    | 8.5×10 <sup>-1</sup>   | 0.002     | 38           | MR Egger |             |
|                   |             | Breast cancer (OR)              | 1.02 (1.00; 1.04)    | 2.3×10 <sup>-2</sup>   | 0.202     | 37           | IVW      |             |
|                   |             | Lung cancer (OR)                | 0.99 (0.89; 1.09)    | 7.7×10 <sup>-1</sup>   | 0.005     | 39           | MR Egger |             |
|                   |             | Colon cancer (OR)               | 1.07 (1.03; 1.11)    | 1.4×10 <sup>-4</sup>   | 0.019     | 34           | IVW      |             |
|                   |             | Prostate cancer (OR)            | 0.94 (0.90; 0.99)    | 1.8×10 <sup>-2</sup>   | 0.014     | 40           | MR Egger |             |
| CATB (P07858)     | Concordant  | HF (OR)                         | 1.01 (0.95; 1.06)    | 8.5×10 <sup>-1</sup>   | 0.046     | 21           | MR Egger | Interval    |
|                   |             | Non-ischemic CM (OR)            | 1.12 (1.01; 1.23)    | 2.4×10 <sup>-2</sup>   | <0.001    | 20           | IVW      |             |
|                   |             | DCM (OR)                        | 1.14 (1.03; 1.28)    | 1.6×10 <sup>-2</sup>   | 0.077     | 21           | IVW      |             |
|                   |             | AF (OR)                         | 1.05 (0.99; 1.10)    | 1.0×10 <sup>-1</sup>   | 0.013     | 19           | MR Egger |             |
|                   |             | CHD (OR)                        | 1.07 (1.01; 1.13)    | 2.4×10 <sup>-2</sup>   | 0.337     | 22           | MR Egger |             |
|                   |             | ciMT (mm)                       | -0.00 (-0.00; -0.00) | 4.2×10 <sup>-2</sup>   | <0.001    | 16           | IVW      |             |
|                   |             | Carotid plaque (OR)             | 0.96 (0.91; 1.01)    | 1.3×10 <sup>-1</sup>   | 0.050     | 18           | IVW      |             |
|                   |             | Any stroke (OR)                 | 0.99 (0.96; 1.02)    | 6.0×10 <sup>-1</sup>   | 0.233     | 20           | IVW      |             |
|                   |             | Any ischemic stroke (OR)        | 0.99 (0.96; 1.02)    | 5.9×10 <sup>-1</sup>   | 0.330     | 20           | IVW      |             |
|                   |             | LDL cholesterol (mmol/l)        | 0.04 (0.03; 0.05)    | 2.7×10 <sup>-9</sup>   | <0.001    | 21           | MR Egger |             |
|                   |             | Apolipoprotein B (g/l)          | 0.01 (0.00; 0.01)    | 3.9×10 <sup>-5</sup>   | <0.001    | 18           | MR Egger |             |
|                   |             | Triglycerides (mmol/l)          | 0.07 (0.06; 0.07)    | 1.0×10 <sup>-100</sup> | <0.001    | 13           | IVW      |             |
|                   |             | Cholesterol (mmol/l)            | 0.03 (0.03; 0.04)    | 1.0×10 <sup>-100</sup> | 0.231     | 24           | IVW      |             |

**Table S16:** Phenome-wide drug target MR scan of proteins with a prioritized CMR association. (*continued*)

| Protein (uniprot) | Protein set | Trait                           | Estimate (95%CI)     | P-value                | Q p-value | No. Variants | MR model | PQTL source |
|-------------------|-------------|---------------------------------|----------------------|------------------------|-----------|--------------|----------|-------------|
|                   |             | HDL cholesterol (mmol/l)        | 0.00 (0.00; 0.01)    | 4.4×10 <sup>-7</sup>   | 0.044     | 18           | IWV      |             |
|                   |             | Apolipoprotein A1 (g/l)         | 0.01 (0.00; 0.01)    | 4.4×10 <sup>-3</sup>   | <0.001    | 19           | MR Egger |             |
|                   |             | Glucose (mmol/l)                | -0.01 (-0.01; -0.00) | 7.8×10 <sup>-4</sup>   | 0.188     | 26           | IWV      |             |
|                   |             | Glycated haemoglobin (mmol/mol) | -0.05 (-0.09; -0.02) | 2.6×10 <sup>-3</sup>   | <0.001    | 19           | IWV      |             |
|                   |             | T2DM (OR)                       | 1.01 (0.95; 1.08)    | 7.6×10 <sup>-1</sup>   | 0.056     | 14           | MR Egger |             |
|                   |             | BMI (SD)                        | 0.00 (-0.01; 0.01)   | 1.0×10 <sup>0</sup>    | 0.033     | 14           | MR Egger |             |
|                   |             | SBP (mmHg)                      | -0.41 (-0.66; -0.16) | 1.2×10 <sup>-3</sup>   | 0.002     | 11           | MR Egger |             |
|                   |             | DBP (mmHg)                      | -0.29 (-0.35; -0.24) | 1.0×10 <sup>-100</sup> | 0.002     | 12           | IWV      |             |
|                   |             | ECG heart rate (exercise) (BPM) | 0.25 (0.10; 0.40)    | 1.1×10 <sup>-3</sup>   | 0.149     | 25           | IWV      |             |
|                   |             | ECG load (exercise) (Watts)     | -0.41 (-1.07; 0.24)  | 2.2×10 <sup>-1</sup>   | <0.001    | 21           | MR Egger |             |
|                   |             | Asthma (OR)                     | 1.01 (0.98; 1.05)    | 5.3×10 <sup>-1</sup>   | 0.339     | 25           | MR Egger |             |
|                   |             | CRP (log(mg/L))                 | -0.03 (-0.07; 0.00)  | 7.0×10 <sup>-2</sup>   | 0.002     | 12           | MR Egger |             |
|                   |             | eGFR (SD of log(eGFR))          | -0.00 (-0.00; -0.00) | 7.2×10 <sup>-8</sup>   | 0.078     | 17           | IWV      |             |
|                   |             | BUN (mg/dl)                     | 0.01 (-0.00; 0.01)   | 7.3×10 <sup>-2</sup>   | 0.087     | 23           | MR Egger |             |
|                   |             | CKD (OR)                        | 1.01 (0.95; 1.08)    | 6.9×10 <sup>-1</sup>   | 0.009     | 22           | MR Egger |             |
|                   |             | Alzheimer's (OR)                | 0.98 (0.95; 1.00)    | 4.1×10 <sup>-2</sup>   | 0.226     | 17           | MR Egger |             |
|                   |             | Parkinson's (OR)                | 0.69 (0.60; 0.80)    | 6.8×10 <sup>-7</sup>   | 0.234     | 20           | MR Egger |             |
|                   |             | Lewy body dementia (OR)         | 0.89 (0.77; 1.03)    | 1.2×10 <sup>-1</sup>   | 0.125     | 15           | IWV      |             |
|                   |             | Breast cancer (OR)              | 0.98 (0.89; 1.08)    | 7.5×10 <sup>-1</sup>   | 0.261     | 18           | MR Egger |             |
|                   |             | Lung cancer (OR)                | 1.00 (0.93; 1.09)    | 9.1×10 <sup>-1</sup>   | 0.843     | 20           | IWV      |             |
|                   |             | Colon cancer (OR)               | 1.17 (1.00; 1.37)    | 5.3×10 <sup>-2</sup>   | <0.001    | 21           | MR Egger |             |
|                   |             | Prostate cancer (OR)            | 0.96 (0.92; 1.00)    | 5.6×10 <sup>-2</sup>   | <0.001    | 20           | IWV      |             |
| ENTP1 (P49961)    | Concordant  | HF (OR)                         | 1.00 (0.96; 1.04)    | 1.0×10 <sup>0</sup>    | 0.181     | 8            | IWV      | Interval    |
|                   |             | Non-ischemic CM (OR)            | 0.84 (0.72; 0.97)    | 2.1×10 <sup>-2</sup>   | 0.370     | 8            | IWV      |             |
|                   |             | DCM (OR)                        | 1.24 (1.10; 1.40)    | 7.0×10 <sup>-4</sup>   | 0.778     | 9            | IWV      |             |
|                   |             | AF (OR)                         | 0.91 (0.78; 1.07)    | 2.5×10 <sup>-1</sup>   | 0.922     | 9            | MR Egger |             |
|                   |             | CHD (OR)                        | 0.99 (0.89; 1.09)    | 8.2×10 <sup>-1</sup>   | 0.982     | 9            | MR Egger |             |
|                   |             | clMT (mm)                       | 0.00 (0.00; 0.01)    | 3.2×10 <sup>-2</sup>   | 0.182     | 7            | IWV      |             |
|                   |             | Carotid plaque (OR)             | 0.94 (0.87; 1.00)    | 5.6×10 <sup>-2</sup>   | 0.767     | 8            | IWV      |             |
|                   |             | Any stroke (OR)                 | 1.19 (1.14; 1.23)    | 1.0×10 <sup>-100</sup> | 0.514     | 8            | IWV      |             |
|                   |             | Any ischemic stroke (OR)        | 1.18 (1.13; 1.23)    | 1.6×10 <sup>-14</sup>  | 0.499     | 8            | IWV      |             |
|                   |             | LDL cholesterol (mmol/l)        | -0.04 (-0.05; -0.04) | 1.0×10 <sup>-100</sup> | 0.172     | 10           | IWV      |             |
|                   |             | Apolipoprotein B (g/l)          | -0.01 (-0.01; -0.01) | 1.0×10 <sup>-100</sup> | 0.029     | 10           | IWV      |             |
|                   |             | Triglycerides (mmol/l)          | -0.15 (-0.31; 0.00)  | 5.2×10 <sup>-2</sup>   | 0.651     | 6            | MR Egger |             |
|                   |             | Cholesterol (mmol/l)            | -0.05 (-0.06; -0.05) | 1.0×10 <sup>-100</sup> | 0.221     | 10           | IWV      |             |
|                   |             | HDL cholesterol (mmol/l)        | -0.01 (-0.01; -0.01) | 1.5×10 <sup>-13</sup>  | 0.167     | 10           | IWV      |             |
|                   |             | Apolipoprotein A1 (g/l)         | -0.01 (-0.01; -0.01) | 1.0×10 <sup>-100</sup> | 0.936     | 10           | IWV      |             |
|                   |             | Glucose (mmol/l)                | -0.02 (-0.03; -0.01) | 1.2×10 <sup>-6</sup>   | 0.126     | 9            | IWV      |             |
|                   |             | Glycated haemoglobin (mmol/mol) | 0.25 (-0.35; 0.86)   | 4.1×10 <sup>-1</sup>   | 0.074     | 8            | MR Egger |             |
|                   |             | T2DM (OR)                       | 0.99 (0.93; 1.06)    | 8.7×10 <sup>-1</sup>   | 0.072     | 5            | IWV      |             |
|                   |             | BMI (SD)                        | -0.00 (-0.01; 0.01)  | 4.8×10 <sup>-1</sup>   | 0.227     | 8            | IWV      |             |
|                   |             | SBP (mmHg)                      | 1.20 (0.56; 1.85)    | 2.7×10 <sup>-4</sup>   | 0.116     | 7            | MR Egger |             |
|                   |             | DBP (mmHg)                      | 0.14 (-0.05; 0.34)   | 1.5×10 <sup>-1</sup>   | 0.213     | 4            | IWV      |             |
|                   |             | ECG heart rate (exercise) (BPM) | -0.27 (-0.43; -0.11) | 1.3×10 <sup>-3</sup>   | 0.971     | 10           | IWV      |             |
|                   |             | ECG load (exercise) (Watts)     | -0.27 (-0.45; -0.09) | 3.8×10 <sup>-3</sup>   | 0.486     | 10           | IWV      |             |
|                   |             | Asthma (OR)                     | 1.10 (0.84; 1.46)    | 4.9×10 <sup>-1</sup>   | 0.123     | 6            | MR Egger |             |
|                   |             | CRP (log(mg/L))                 | -0.02 (-0.04; 0.01)  | 2.5×10 <sup>-1</sup>   | 0.187     | 7            | IWV      |             |
|                   |             | eGFR (SD of log(eGFR))          | 0.00 (-0.00; 0.00)   | 8.6×10 <sup>-1</sup>   | 0.564     | 5            | IWV      |             |
|                   |             | BUN (mg/dl)                     | 0.00 (-0.01; 0.02)   | 8.4×10 <sup>-1</sup>   | 0.444     | 8            | MR Egger |             |
|                   |             | CKD (OR)                        | 1.05 (0.99; 1.11)    | 1.3×10 <sup>-1</sup>   | 0.101     | 7            | IWV      |             |
|                   |             | Alzheimer's (OR)                | 1.00 (0.99; 1.01)    | 9.4×10 <sup>-1</sup>   | 0.069     | 9            | IWV      |             |
|                   |             | Parkinson's (OR)                | 1.04 (0.79; 1.37)    | 7.5×10 <sup>-1</sup>   | 0.859     | 8            | MR Egger |             |
|                   |             | Lewy body dementia (OR)         | 1.05 (0.87; 1.27)    | 6.0×10 <sup>-1</sup>   | 0.584     | 7            | IWV      |             |
|                   |             | Breast cancer (OR)              | 1.01 (0.98; 1.05)    | 3.7×10 <sup>-1</sup>   | 0.800     | 9            | IWV      |             |
|                   |             | Lung cancer (OR)                | 1.00 (0.92; 1.09)    | 9.8×10 <sup>-1</sup>   | 0.348     | 9            | IWV      |             |
|                   |             | Colon cancer (OR)               | 1.06 (0.97; 1.16)    | 1.8×10 <sup>-1</sup>   | 0.081     | 9            | IWV      |             |
|                   |             | Prostate cancer (OR)            | 0.98 (0.94; 1.02)    | 2.6×10 <sup>-1</sup>   | 0.454     | 9            | IWV      |             |
| GPC5 (P78333)     | Concordant  | HF (OR)                         | 1.01 (1.00; 1.03)    | 1.3×10 <sup>-1</sup>   | 0.336     | 65           | MR Egger | Interval    |
|                   |             | Non-ischemic CM (OR)            | 0.98 (0.95; 1.01)    | 1.8×10 <sup>-1</sup>   | 0.003     | 67           | IWV      |             |
|                   |             | DCM (OR)                        | 1.15 (1.11; 1.20)    | 5.8×10 <sup>-12</sup>  | <0.001    | 62           | IWV      |             |
|                   |             | AF (OR)                         | 1.02 (1.00; 1.04)    | 1.8×10 <sup>-2</sup>   | 0.002     | 81           | MR Egger |             |
|                   |             | CHD (OR)                        | 1.01 (0.99; 1.02)    | 5.2×10 <sup>-1</sup>   | 0.045     | 72           | MR Egger |             |
|                   |             | clMT (mm)                       | 0.00 (0.00; 0.00)    | 4.3×10 <sup>-3</sup>   | 0.696     | 69           | MR Egger |             |
|                   |             | Carotid plaque (OR)             | 1.02 (1.00; 1.04)    | 3.3×10 <sup>-2</sup>   | 0.017     | 62           | IWV      |             |
|                   |             | Any stroke (OR)                 | 1.00 (0.98; 1.02)    | 8.8×10 <sup>-1</sup>   | 0.447     | 66           | MR Egger |             |
|                   |             | Any ischemic stroke (OR)        | 0.98 (0.95; 1.00)    | 6.3×10 <sup>-2</sup>   | 0.188     | 67           | MR Egger |             |

**Table S16:** Phenome-wide drug target MR scan of proteins with a prioritized CMR association. (*continued*)

| Protein (uniprot) | Protein set | Trait                           | Estimate (95%CI)     | P-value               | Q p-value | No. Variants | MR model | PQTL source |
|-------------------|-------------|---------------------------------|----------------------|-----------------------|-----------|--------------|----------|-------------|
|                   |             | LDL cholesterol (mmol/l)        | -0.00 (-0.00; 0.00)  | 8.3×10 <sup>-1</sup>  | 0.033     | 83           | MR Egger |             |
|                   |             | Apolipoprotein B (g/l)          | -0.00 (-0.00; 0.00)  | 3.6×10 <sup>-1</sup>  | 0.102     | 82           | MR Egger |             |
|                   |             | Triglycerides (mmol/l)          | 0.01 (0.00; 0.01)    | 1.6×10 <sup>-7</sup>  | <0.001    | 76           | IWV      |             |
|                   |             | Cholesterol (mmol/l)            | 0.00 (0.00; 0.01)    | 1.1×10 <sup>-2</sup>  | 0.222     | 76           | IWV      |             |
|                   |             | HDL cholesterol (mmol/l)        | 0.01 (0.01; 0.01)    | 2.7×10 <sup>-15</sup> | <0.001    | 77           | MR Egger |             |
|                   |             | Apolipoprotein A1 (g/l)         | 0.00 (0.00; 0.00)    | 1.4×10 <sup>-4</sup>  | <0.001    | 74           | IWV      |             |
|                   |             | Glucose (mmol/l)                | 0.01 (0.01; 0.02)    | 5.4×10 <sup>-4</sup>  | 0.147     | 82           | MR Egger |             |
|                   |             | Glycated haemoglobin (mmol/mol) | 0.03 (-0.01; 0.07)   | 9.3×10 <sup>-2</sup>  | <0.001    | 79           | MR Egger |             |
|                   |             | T2DM (OR)                       | 1.01 (0.99; 1.02)    | 3.6×10 <sup>-1</sup>  | 0.027     | 66           | MR Egger |             |
|                   |             | BMI (SD)                        | -0.00 (-0.00; -0.00) | 2.0×10 <sup>-2</sup>  | 0.003     | 61           | IWV      |             |
|                   |             | SBP (mmHg)                      | 0.08 (0.05; 0.11)    | 9.9×10 <sup>-7</sup>  | <0.001    | 57           | IWV      |             |
|                   |             | DBP (mmHg)                      | 0.08 (0.04; 0.11)    | 1.1×10 <sup>-4</sup>  | 0.301     | 61           | MR Egger |             |
|                   |             | ECG heart rate (exercise) (BPM) | -0.09 (-0.31; 0.12)  | 3.9×10 <sup>-1</sup>  | 0.165     | 81           | MR Egger |             |
|                   |             | ECG load (exercise) (Watts)     | 0.20 (-0.02; 0.42)   | 7.8×10 <sup>-2</sup>  | 0.005     | 83           | MR Egger |             |
|                   |             | Asthma (OR)                     | 1.03 (1.02; 1.05)    | 2.3×10 <sup>-5</sup>  | <0.001    | 81           | MR Egger |             |
|                   |             | CRP (log(mg/L))                 | 0.01 (-0.00; 0.01)   | 2.8×10 <sup>-1</sup>  | 0.324     | 61           | MR Egger |             |
|                   |             | eGFR (SD of log(eGFR))          | 0.00 (0.00; 0.00)    | 4.7×10 <sup>-4</sup>  | <0.001    | 65           | IWV      |             |
|                   |             | BUN (mg/dl)                     | 0.00 (-0.00; 0.00)   | 5.1×10 <sup>-1</sup>  | 0.003     | 63           | IWV      |             |
|                   |             | CKD (OR)                        | 0.97 (0.96; 0.98)    | 6.0×10 <sup>-11</sup> | 0.393     | 66           | IWV      |             |
|                   |             | Alzheimer's (OR)                | 1.00 (1.00; 1.01)    | 5.2×10 <sup>-2</sup>  | <0.001    | 66           | IWV      |             |
|                   |             | Parkinson's (OR)                | 1.01 (0.98; 1.03)    | 6.9×10 <sup>-1</sup>  | 0.053     | 65           | IWV      |             |
|                   |             | Lewy body dementia (OR)         | 1.20 (1.13; 1.28)    | 5.0×10 <sup>-9</sup>  | 0.112     | 58           | MR Egger |             |
|                   |             | Breast cancer (OR)              | 1.01 (0.99; 1.02)    | 4.1×10 <sup>-1</sup>  | 0.009     | 75           | IWV      |             |
|                   |             | Lung cancer (OR)                | 0.90 (0.85; 0.96)    | 1.6×10 <sup>-3</sup>  | 0.171     | 82           | MR Egger |             |
|                   |             | Colon cancer (OR)               | 0.88 (0.83; 0.93)    | 3.9×10 <sup>-5</sup>  | 0.057     | 79           | MR Egger |             |
|                   |             | Prostate cancer (OR)            | 0.98 (0.97; 1.00)    | 7.2×10 <sup>-2</sup>  | <0.001    | 75           | IWV      |             |
| IL18R (Q13478)    | Concordant  | HF (OR)                         | 1.03 (1.01; 1.05)    | 5.5×10 <sup>-3</sup>  | <0.001    | 32           | MR Egger | Interval    |
|                   |             | Non-ischemic CM (OR)            | 0.94 (0.91; 0.97)    | 1.6×10 <sup>-5</sup>  | 0.018     | 31           | IWV      |             |
|                   |             | DCM (OR)                        | 0.88 (0.83; 0.92)    | 2.1×10 <sup>-7</sup>  | <0.001    | 29           | IWV      |             |
|                   |             | AF (OR)                         | 1.01 (1.00; 1.02)    | 1.6×10 <sup>-1</sup>  | <0.001    | 33           | IWV      |             |
|                   |             | CHD (OR)                        | 1.03 (1.01; 1.05)    | 1.6×10 <sup>-3</sup>  | 0.005     | 36           | MR Egger |             |
|                   |             | cIMT (mm)                       | -0.00 (-0.01; -0.00) | 1.1×10 <sup>-4</sup>  | 0.284     | 32           | MR Egger |             |
|                   |             | Carotid plaque (OR)             | 0.90 (0.86; 0.94)    | 3.4×10 <sup>-7</sup>  | 0.546     | 33           | MR Egger |             |
|                   |             | Any stroke (OR)                 | 0.96 (0.93; 1.00)    | 3.3×10 <sup>-2</sup>  | 0.098     | 32           | MR Egger |             |
|                   |             | Any ischemic stroke (OR)        | 1.01 (0.97; 1.05)    | 6.7×10 <sup>-1</sup>  | 0.145     | 32           | MR Egger |             |
|                   |             | LDL cholesterol (mmol/l)        | 0.00 (-0.01; 0.01)   | 7.5×10 <sup>-1</sup>  | 0.626     | 37           | MR Egger |             |
|                   |             | Apolipoprotein B (g/l)          | 0.00 (0.00; 0.00)    | 5.2×10 <sup>-5</sup>  | <0.001    | 29           | IWV      |             |
|                   |             | Triglycerides (mmol/l)          | 0.00 (-0.00; 0.01)   | 3.4×10 <sup>-1</sup>  | <0.001    | 25           | IWV      |             |
|                   |             | Cholesterol (mmol/l)            | 0.01 (0.01; 0.02)    | 4.5×10 <sup>-5</sup>  | <0.001    | 40           | MR Egger |             |
|                   |             | HDL cholesterol (mmol/l)        | 0.00 (-0.00; 0.00)   | 6.8×10 <sup>-1</sup>  | <0.001    | 33           | IWV      |             |
|                   |             | Apolipoprotein A1 (g/l)         | -0.00 (-0.00; 0.00)  | 5.8×10 <sup>-1</sup>  | <0.001    | 33           | IWV      |             |
|                   |             | Glucose (mmol/l)                | -0.00 (-0.01; 0.01)  | 7.3×10 <sup>-1</sup>  | 0.089     | 38           | MR Egger |             |
|                   |             | Glycated haemoglobin (mmol/mol) | 0.00 (-0.04; 0.05)   | 8.3×10 <sup>-1</sup>  | 0.052     | 40           | MR Egger |             |
|                   |             | T2DM (OR)                       | 1.03 (1.01; 1.05)    | 2.3×10 <sup>-4</sup>  | 0.336     | 31           | MR Egger |             |
|                   |             | BMI (SD)                        | 0.01 (0.00; 0.01)    | 2.4×10 <sup>-3</sup>  | 0.011     | 29           | MR Egger |             |
|                   |             | SBP (mmHg)                      | -0.09 (-0.17; 0.00)  | 5.0×10 <sup>-2</sup>  | 0.176     | 30           | MR Egger |             |
|                   |             | DBP (mmHg)                      | 0.02 (-0.02; 0.06)   | 3.7×10 <sup>-1</sup>  | 0.019     | 28           | MR Egger |             |
|                   |             | ECG heart rate (exercise) (BPM) | 0.00 (-0.08; 0.08)   | 9.9×10 <sup>-1</sup>  | 0.193     | 38           | IWV      |             |
|                   |             | ECG load (exercise) (Watts)     | 0.13 (-0.08; 0.33)   | 2.3×10 <sup>-1</sup>  | 0.798     | 41           | MR Egger |             |
|                   |             | Asthma (OR)                     | 0.90 (0.86; 0.94)    | 5.4×10 <sup>-6</sup>  | <0.001    | 15           | MR Egger |             |
|                   |             | CRP (log(mg/L))                 | 0.04 (0.03; 0.05)    | 1.3×10 <sup>-14</sup> | 0.009     | 21           | IWV      |             |
|                   |             | eGFR (SD of log(eGFR))          | 0.00 (-0.00; 0.00)   | 8.9×10 <sup>-1</sup>  | <0.001    | 18           | IWV      |             |
|                   |             | BUN (mg/dl)                     | 0.00 (0.00; 0.01)    | 3.5×10 <sup>-3</sup>  | 0.231     | 31           | MR Egger |             |
|                   |             | CKD (OR)                        | 1.01 (0.96; 1.05)    | 8.0×10 <sup>-1</sup>  | 0.002     | 25           | MR Egger |             |
|                   |             | Alzheimer's (OR)                | 1.01 (1.00; 1.02)    | 1.2×10 <sup>-1</sup>  | 0.155     | 31           | MR Egger |             |
|                   |             | Parkinson's (OR)                | 0.92 (0.84; 1.01)    | 8.2×10 <sup>-2</sup>  | 0.112     | 28           | MR Egger |             |
|                   |             | Lewy body dementia (OR)         | 0.90 (0.82; 0.98)    | 2.1×10 <sup>-2</sup>  | 0.010     | 30           | MR Egger |             |
|                   |             | Breast cancer (OR)              | 0.99 (0.96; 1.02)    | 3.3×10 <sup>-1</sup>  | 0.041     | 37           | MR Egger |             |
|                   |             | Lung cancer (OR)                | 1.04 (1.01; 1.07)    | 4.0×10 <sup>-3</sup>  | 0.491     | 36           | IWV      |             |
|                   |             | Colon cancer (OR)               | 0.96 (0.93; 0.99)    | 1.1×10 <sup>-2</sup>  | <0.001    | 28           | IWV      |             |
|                   |             | Prostate cancer (OR)            | 1.07 (1.03; 1.12)    | 7.6×10 <sup>-4</sup>  | 0.311     | 37           | MR Egger |             |
| ISK2 (P20155)     | Concordant  | HF (OR)                         | 1.00 (0.97; 1.03)    | 9.3×10 <sup>-1</sup>  | 0.163     | 15           | IWV      | Interval    |
|                   |             | Non-ischemic CM (OR)            | 0.98 (0.87; 1.09)    | 6.7×10 <sup>-1</sup>  | 0.756     | 15           | IWV      |             |
|                   |             | DCM (OR)                        | 0.99 (0.86; 1.14)    | 9.0×10 <sup>-1</sup>  | 0.977     | 15           | IWV      |             |
|                   |             | AF (OR)                         | 1.00 (0.98; 1.03)    | 8.4×10 <sup>-1</sup>  | 0.012     | 16           | IWV      |             |
|                   |             | CHD (OR)                        | 1.04 (1.00; 1.07)    | 3.5×10 <sup>-2</sup>  | 0.117     | 15           | IWV      |             |

**Table S16:** Phenome-wide drug target MR scan of proteins with a prioritized CMR association. (*continued*)

| Protein (uniprot) | Protein set | Trait                           | Estimate (95%CI)     | P-value                | Q p-value | No. Variants | MR model | PQTL source |
|-------------------|-------------|---------------------------------|----------------------|------------------------|-----------|--------------|----------|-------------|
|                   |             | cIMT (mm)                       | 0.00 (-0.00; 0.00)   | 8.1×10 <sup>-1</sup>   | 0.390     | 15           | IVW      |             |
|                   |             | Carotid plaque (OR)             | 1.17 (1.10; 1.24)    | 2.7×10 <sup>-7</sup>   | 0.564     | 14           | IVW      |             |
|                   |             | Any stroke (OR)                 | 0.95 (0.84; 1.08)    | 4.6×10 <sup>-1</sup>   | 0.205     | 16           | MR Egger |             |
|                   |             | Any ischemic stroke (OR)        | 1.00 (0.96; 1.05)    | 9.0×10 <sup>-1</sup>   | 0.209     | 14           | IVW      |             |
|                   |             | LDL cholesterol (mmol/l)        | -0.01 (-0.02; -0.00) | 2.3×10 <sup>-2</sup>   | 0.029     | 18           | IVW      |             |
|                   |             | Apolipoprotein B (g/l)          | -0.00 (-0.01; -0.00) | 9.1×10 <sup>-3</sup>   | 0.129     | 17           | IVW      |             |
|                   |             | Triglycerides (mmol/l)          | -0.01 (-0.02; -0.00) | 5.9×10 <sup>-3</sup>   | 0.127     | 17           | IVW      |             |
|                   |             | Cholesterol (mmol/l)            | -0.01 (-0.02; 0.00)  | 1.7×10 <sup>-1</sup>   | 0.201     | 18           | IVW      |             |
|                   |             | HDL cholesterol (mmol/l)        | 0.01 (-0.00; 0.02)   | 3.0×10 <sup>-1</sup>   | 0.389     | 20           | MR Egger |             |
|                   |             | Apolipoprotein A1 (g/l)         | 0.01 (-0.00; 0.01)   | 8.2×10 <sup>-2</sup>   | 0.482     | 20           | MR Egger |             |
|                   |             | Glucose (mmol/l)                | -0.01 (-0.02; -0.00) | 7.6×10 <sup>-3</sup>   | 0.535     | 19           | IVW      |             |
|                   |             | Glycated haemoglobin (mmol/mol) | 0.01 (-0.04; 0.06)   | 7.4×10 <sup>-1</sup>   | 0.257     | 19           | IVW      |             |
|                   |             | T2DM (OR)                       | 1.01 (0.99; 1.04)    | 2.6×10 <sup>-1</sup>   | 0.192     | 15           | IVW      |             |
|                   |             | BMI (SD)                        | -0.02 (-0.02; -0.01) | 3.2×10 <sup>-7</sup>   | 0.867     | 15           | IVW      |             |
|                   |             | SBP (mmHg)                      | -0.06 (-0.17; 0.04)  | 2.5×10 <sup>-1</sup>   | 0.363     | 15           | IVW      |             |
|                   |             | DBP (mmHg)                      | -0.01 (-0.07; 0.05)  | 7.2×10 <sup>-1</sup>   | 0.537     | 15           | IVW      |             |
|                   |             | ECG heart rate (exercise) (BPM) | -0.53 (-1.52; 0.45)  | 2.9×10 <sup>-1</sup>   | 0.500     | 20           | MR Egger |             |
|                   |             | ECG load (exercise) (Watts)     | 0.11 (-1.12; 1.34)   | 8.6×10 <sup>-1</sup>   | 0.221     | 20           | MR Egger |             |
|                   |             | Asthma (OR)                     | 1.00 (0.98; 1.02)    | 8.9×10 <sup>-1</sup>   | 0.079     | 20           | IVW      |             |
|                   |             | CRP (log(mg/L))                 | -0.01 (-0.02; 0.01)  | 4.8×10 <sup>-1</sup>   | 0.121     | 15           | IVW      |             |
|                   |             | eGFR (SD of log(eGFR))          | -0.00 (-0.00; -0.00) | 5.3×10 <sup>-3</sup>   | 0.968     | 15           | IVW      |             |
|                   |             | BUN (mg/dl)                     | 0.01 (-0.00; 0.02)   | 5.7×10 <sup>-2</sup>   | 0.510     | 16           | MR Egger |             |
|                   |             | CKD (OR)                        | 0.98 (0.94; 1.01)    | 1.4×10 <sup>-1</sup>   | 0.607     | 15           | IVW      |             |
|                   |             | Alzheimer's (OR)                | 1.00 (0.97; 1.03)    | 9.8×10 <sup>-1</sup>   | 0.221     | 15           | MR Egger |             |
|                   |             | Parkinson's (OR)                | 0.98 (0.90; 1.06)    | 5.5×10 <sup>-1</sup>   | 0.942     | 15           | IVW      |             |
|                   |             | Lewy body dementia (OR)         | 1.16 (1.03; 1.31)    | 1.2×10 <sup>-2</sup>   | 0.981     | 17           | IVW      |             |
|                   |             | Breast cancer (OR)              | 0.98 (0.93; 1.02)    | 3.2×10 <sup>-1</sup>   | 0.198     | 15           | IVW      |             |
|                   |             | Lung cancer (OR)                | 1.23 (0.87; 1.75)    | 2.4×10 <sup>-1</sup>   | 0.286     | 17           | MR Egger |             |
|                   |             | Colon cancer (OR)               | 0.90 (0.82; 0.99)    | 2.6×10 <sup>-2</sup>   | 0.128     | 17           | IVW      |             |
|                   |             | Prostate cancer (OR)            | 1.02 (0.86; 1.20)    | 8.5×10 <sup>-1</sup>   | 0.657     | 17           | MR Egger |             |
| KAT3 (Q6YP21)     | Concordant  | HF (OR)                         | 0.90 (0.83; 0.98)    | 1.1×10 <sup>-2</sup>   | 0.192     | 3            | IVW      | Interval    |
|                   |             | Non-ischemic CM (OR)            | 0.99 (0.75; 1.29)    | 9.2×10 <sup>-1</sup>   | 0.803     | 3            | IVW      |             |
|                   |             | DCM (OR)                        | 1.30 (0.95; 1.78)    | 9.9×10 <sup>-2</sup>   | 0.791     | 3            | IVW      |             |
|                   |             | AF (OR)                         | 0.90 (0.85; 0.95)    | 8.1×10 <sup>-5</sup>   | 0.599     | 3            | IVW      |             |
|                   |             | CHD (OR)                        | 0.93 (0.87; 1.00)    | 4.4×10 <sup>-2</sup>   | 0.899     | 3            | IVW      |             |
|                   |             | cIMT (mm)                       | -0.00 (-0.01; 0.01)  | 7.0×10 <sup>-1</sup>   | 0.155     | 3            | IVW      |             |
|                   |             | Carotid plaque (OR)             | 0.86 (0.75; 0.99)    | 4.1×10 <sup>-2</sup>   | 0.334     | 3            | IVW      |             |
|                   |             | Any stroke (OR)                 | 0.91 (0.85; 0.98)    | 1.7×10 <sup>-2</sup>   | 0.740     | 3            | IVW      |             |
|                   |             | Any ischemic stroke (OR)        | 0.89 (0.82; 0.97)    | 7.2×10 <sup>-3</sup>   | 0.842     | 3            | IVW      |             |
|                   |             | LDL cholesterol (mmol/l)        | 0.03 (0.02; 0.05)    | 1.0×10 <sup>-5</sup>   | 0.200     | 4            | IVW      |             |
|                   |             | Apolipoprotein B (g/l)          | 0.01 (0.01; 0.01)    | 2.4×10 <sup>-9</sup>   | 0.432     | 4            | IVW      |             |
|                   |             | Triglycerides (mmol/l)          | -0.00 (-0.02; 0.01)  | 8.0×10 <sup>-1</sup>   | 0.883     | 4            | IVW      |             |
|                   |             | Cholesterol (mmol/l)            | 0.05 (0.03; 0.06)    | 6.8×10 <sup>-10</sup>  | 0.440     | 4            | IVW      |             |
|                   |             | HDL cholesterol (mmol/l)        | 0.15 (-0.03; 0.34)   | 1.1×10 <sup>-1</sup>   | 0.246     | 4            | MR Egger |             |
|                   |             | Apolipoprotein A1 (g/l)         | 0.11 (-0.05; 0.28)   | 1.7×10 <sup>-1</sup>   | 0.109     | 4            | MR Egger |             |
|                   |             | Glucose (mmol/l)                | -0.03 (-0.05; -0.01) | 3.9×10 <sup>-4</sup>   | 0.949     | 4            | IVW      |             |
|                   |             | Glycated haemoglobin (mmol/mol) | 1.90 (-0.82; 4.63)   | 1.7×10 <sup>-1</sup>   | 0.761     | 4            | MR Egger |             |
|                   |             | T2DM (OR)                       | 0.92 (0.87; 0.98)    | 7.5×10 <sup>-3</sup>   | 0.268     | 3            | IVW      |             |
|                   |             | BMI (SD)                        | -0.05 (-0.06; -0.03) | 7.9×10 <sup>-10</sup>  | 0.279     | 3            | IVW      |             |
|                   |             | SBP (mmHg)                      | -2.18 (-2.57; -1.80) | 1.0×10 <sup>-100</sup> | 0.129     | 2            | IVW      |             |
|                   |             | DBP (mmHg)                      | -0.67 (-0.95; -0.40) | 1.8×10 <sup>-6</sup>   | 0.057     | 2            | IVW      |             |
|                   |             | ECG heart rate (exercise) (BPM) | 0.39 (-0.12; 0.91)   | 1.3×10 <sup>-1</sup>   | 0.425     | 4            | IVW      |             |
|                   |             | ECG load (exercise) (Watts)     | 1.58 (1.01; 2.16)    | 6.8×10 <sup>-8</sup>   | 0.030     | 4            | IVW      |             |
|                   |             | Asthma (OR)                     | 0.75 (0.51; 1.11)    | 1.5×10 <sup>-1</sup>   | 0.975     | 5            | MR Egger |             |
|                   |             | CRP (log(mg/L))                 | -0.03 (-0.06; 0.01)  | 1.1×10 <sup>-1</sup>   | 0.572     | 3            | IVW      |             |
|                   |             | eGFR (SD of log(eGFR))          | 0.01 (0.01; 0.02)    | 1.0×10 <sup>-100</sup> | 0.365     | 3            | IVW      |             |
|                   |             | BUN (mg/dl)                     | -0.02 (-0.03; -0.01) | 2.6×10 <sup>-5</sup>   | 0.148     | 3            | IVW      |             |
|                   |             | CKD (OR)                        | 0.89 (0.82; 0.96)    | 2.9×10 <sup>-3</sup>   | 0.958     | 3            | IVW      |             |
|                   |             | Alzheimer's (OR)                | 1.03 (1.01; 1.05)    | 9.5×10 <sup>-3</sup>   | 0.191     | 3            | IVW      |             |
|                   |             | Parkinson's (OR)                | 1.07 (0.92; 1.24)    | 3.7×10 <sup>-1</sup>   | 0.840     | 3            | IVW      |             |
|                   |             | Lewy body dementia (OR)         | 0.96 (0.70; 1.30)    | 7.8×10 <sup>-1</sup>   | 0.414     | 2            | IVW      |             |
|                   |             | Breast cancer (OR)              | 1.08 (0.98; 1.20)    | 1.2×10 <sup>-1</sup>   | 0.276     | 3            | IVW      |             |
|                   |             | Lung cancer (OR)                | 0.88 (0.70; 1.11)    | 2.7×10 <sup>-1</sup>   | 0.585     | 3            | IVW      |             |
|                   |             | Colon cancer (OR)               | 1.37 (1.13; 1.65)    | 1.1×10 <sup>-3</sup>   | 0.659     | 3            | IVW      |             |
|                   |             | Prostate cancer (OR)            | 1.04 (0.92; 1.17)    | 5.4×10 <sup>-1</sup>   | 0.715     | 3            | IVW      |             |
| MANBA (O00462)    | Concordant  | HF (OR)                         | 1.02 (1.01; 1.03)    | 1.8×10 <sup>-3</sup>   | 0.803     | 20           | IVW      | Interval    |

**Table S16:** Phenome-wide drug target MR scan of proteins with a prioritized CMR association. (*continued*)

| Protein (uniprot) | Protein set | Trait                           | Estimate (95%CI)     | P-value                | Q p-value | No. Variants | MR model | PQTL source |
|-------------------|-------------|---------------------------------|----------------------|------------------------|-----------|--------------|----------|-------------|
|                   |             | Non-ischemic CM (OR)            | 1.04 (0.98; 1.11)    | 2.3×10 <sup>-1</sup>   | 0.306     | 20           | IVW      |             |
|                   |             | DCM (OR)                        | 0.76 (0.72; 0.81)    | 1.0×10 <sup>-100</sup> | 0.014     | 20           | IVW      |             |
|                   |             | AF (OR)                         | 1.11 (1.05; 1.17)    | 2.6×10 <sup>-4</sup>   | 0.078     | 22           | MR Egger |             |
|                   |             | CHD (OR)                        | 0.93 (0.91; 0.96)    | 7.6×10 <sup>-8</sup>   | 0.004     | 22           | MR Egger |             |
|                   |             | clMT (mm)                       | 0.00 (-0.00; 0.00)   | 7.7×10 <sup>-2</sup>   | 0.343     | 17           | IVW      |             |
|                   |             | Carotid plaque (OR)             | 1.11 (1.08; 1.14)    | 2.2×10 <sup>-16</sup>  | 0.642     | 18           | IVW      |             |
|                   |             | Any stroke (OR)                 | 1.02 (0.99; 1.06)    | 1.9×10 <sup>-1</sup>   | 0.215     | 22           | MR Egger |             |
|                   |             | Any ischemic stroke (OR)        | 1.01 (0.99; 1.03)    | 2.8×10 <sup>-1</sup>   | 0.504     | 20           | IVW      |             |
|                   |             | LDL cholesterol (mmol/l)        | 0.00 (-0.01; 0.01)   | 6.7×10 <sup>-1</sup>   | 0.560     | 24           | MR Egger |             |
|                   |             | Apolipoprotein B (g/l)          | -0.00 (-0.00; 0.00)  | 3.9×10 <sup>-1</sup>   | 0.132     | 23           | MR Egger |             |
|                   |             | Triglycerides (mmol/l)          | -0.03 (-0.04; -0.02) | 6.3×10 <sup>-11</sup>  | 0.185     | 24           | MR Egger |             |
|                   |             | Cholesterol (mmol/l)            | 0.02 (0.01; 0.02)    | 1.0×10 <sup>-10</sup>  | <0.001    | 19           | IVW      |             |
|                   |             | HDL cholesterol (mmol/l)        | 0.00 (0.00; 0.01)    | 6.3×10 <sup>-5</sup>   | <0.001    | 16           | IVW      |             |
|                   |             | Apolipoprotein A1 (g/l)         | 0.00 (0.00; 0.00)    | 2.9×10 <sup>-3</sup>   | <0.001    | 17           | IVW      |             |
|                   |             | Glucose (mmol/l)                | -0.03 (-0.04; -0.03) | 1.0×10 <sup>-100</sup> | 0.318     | 20           | IVW      |             |
|                   |             | Glycated haemoglobin (mmol/mol) | -0.05 (-0.13; 0.04)  | 2.8×10 <sup>-1</sup>   | 0.035     | 19           | MR Egger |             |
|                   |             | T2DM (OR)                       | 0.93 (0.90; 0.97)    | 1.3×10 <sup>-4</sup>   | 0.006     | 21           | MR Egger |             |
|                   |             | BMI (SD)                        | -0.02 (-0.02; -0.01) | 1.0×10 <sup>-100</sup> | 0.017     | 17           | IVW      |             |
|                   |             | SBP (mmHg)                      | -0.15 (-0.22; -0.09) | 8.8×10 <sup>-6</sup>   | 0.006     | 11           | IVW      |             |
|                   |             | DBP (mmHg)                      | -0.27 (-0.30; -0.24) | 1.0×10 <sup>-100</sup> | 0.016     | 17           | IVW      |             |
|                   |             | ECG heart rate (exercise) (BPM) | 0.35 (-0.00; 0.70)   | 5.1×10 <sup>-2</sup>   | 0.079     | 25           | MR Egger |             |
|                   |             | ECG load (exercise) (Watts)     | 0.50 (0.20; 0.80)    | 1.2×10 <sup>-3</sup>   | 0.394     | 27           | MR Egger |             |
|                   |             | Asthma (OR)                     | 0.94 (0.92; 0.95)    | 1.0×10 <sup>-100</sup> | 0.249     | 18           | IVW      |             |
|                   |             | CRP (log(mg/L))                 | -0.03 (-0.04; -0.02) | 1.6×10 <sup>-12</sup>  | 0.009     | 17           | IVW      |             |
|                   |             | eGFR (SD of log(eGFR))          | 0.00 (0.00; 0.01)    | 3.2×10 <sup>-6</sup>   | 0.458     | 20           | MR Egger |             |
|                   |             | BUN (mg/dl)                     | -0.01 (-0.01; 0.00)  | 8.5×10 <sup>-2</sup>   | 0.207     | 21           | MR Egger |             |
|                   |             | CKD (OR)                        | 1.00 (0.94; 1.07)    | 9.8×10 <sup>-1</sup>   | 0.136     | 21           | MR Egger |             |
|                   |             | Alzheimer's (OR)                | 1.00 (0.99; 1.00)    | 5.0×10 <sup>-1</sup>   | 0.004     | 21           | IVW      |             |
|                   |             | Parkinson's (OR)                | 0.92 (0.89; 0.96)    | 7.4×10 <sup>-5</sup>   | 0.462     | 18           | IVW      |             |
|                   |             | Lewy body dementia (OR)         | 0.99 (0.95; 1.04)    | 6.5×10 <sup>-1</sup>   | 0.835     | 22           | IVW      |             |
|                   |             | Breast cancer (OR)              | 0.95 (0.91; 1.00)    | 6.5×10 <sup>-2</sup>   | 0.040     | 24           | MR Egger |             |
|                   |             | Lung cancer (OR)                | 1.00 (0.96; 1.04)    | 8.8×10 <sup>-1</sup>   | 0.779     | 24           | IVW      |             |
|                   |             | Colon cancer (OR)               | 1.09 (0.97; 1.23)    | 1.6×10 <sup>-1</sup>   | 0.082     | 23           | MR Egger |             |
|                   |             | Prostate cancer (OR)            | 1.03 (1.00; 1.06)    | 3.3×10 <sup>-2</sup>   | 0.648     | 19           | IVW      |             |
| NCAM2 (O15394)    | Concordant  | HF (OR)                         | 1.02 (1.00; 1.03)    | 1.5×10 <sup>-2</sup>   | 0.010     | 28           | IVW      | Interval    |
|                   |             | Non-ischemic CM (OR)            | 0.92 (0.77; 1.10)    | 3.6×10 <sup>-1</sup>   | 0.161     | 27           | MR Egger |             |
|                   |             | DCM (OR)                        | 0.44 (0.35; 0.56)    | 3.2×10 <sup>-11</sup>  | 0.140     | 29           | MR Egger |             |
|                   |             | AF (OR)                         | 0.99 (0.98; 1.00)    | 5.5×10 <sup>-2</sup>   | <0.001    | 26           | IVW      |             |
|                   |             | CHD (OR)                        | 0.95 (0.90; 1.00)    | 4.5×10 <sup>-2</sup>   | 0.830     | 26           | MR Egger |             |
|                   |             | clMT (mm)                       | 0.00 (0.00; 0.01)    | 2.9×10 <sup>-2</sup>   | 0.582     | 28           | MR Egger |             |
|                   |             | Carotid plaque (OR)             | 1.01 (0.98; 1.04)    | 4.5×10 <sup>-1</sup>   | 0.002     | 26           | IVW      |             |
|                   |             | Any stroke (OR)                 | 0.97 (0.96; 0.99)    | 3.6×10 <sup>-4</sup>   | 0.778     | 28           | IVW      |             |
|                   |             | Any ischemic stroke (OR)        | 0.98 (0.96; 1.00)    | 6.5×10 <sup>-2</sup>   | 0.103     | 28           | IVW      |             |
|                   |             | LDL cholesterol (mmol/l)        | 0.01 (-0.00; 0.02)   | 2.1×10 <sup>-1</sup>   | 0.044     | 29           | MR Egger |             |
|                   |             | Apolipoprotein B (g/l)          | 0.00 (0.00; 0.01)    | 5.7×10 <sup>-3</sup>   | 0.017     | 30           | MR Egger |             |
|                   |             | Triglycerides (mmol/l)          | 0.02 (0.00; 0.03)    | 7.4×10 <sup>-3</sup>   | 0.272     | 31           | MR Egger |             |
|                   |             | Cholesterol (mmol/l)            | -0.00 (-0.01; 0.00)  | 1.7×10 <sup>-1</sup>   | 0.151     | 27           | IVW      |             |
|                   |             | HDL cholesterol (mmol/l)        | -0.00 (-0.01; 0.00)  | 8.2×10 <sup>-2</sup>   | 0.083     | 29           | MR Egger |             |
|                   |             | Apolipoprotein A1 (g/l)         | 0.00 (-0.00; 0.01)   | 3.0×10 <sup>-1</sup>   | 0.274     | 29           | MR Egger |             |
|                   |             | Glucose (mmol/l)                | 0.03 (0.01; 0.04)    | 2.6×10 <sup>-4</sup>   | 0.034     | 26           | MR Egger |             |
|                   |             | Glycated haemoglobin (mmol/mol) | 0.04 (0.01; 0.06)    | 1.6×10 <sup>-3</sup>   | 0.312     | 31           | IVW      |             |
|                   |             | T2DM (OR)                       | 0.98 (0.97; 0.99)    | 4.1×10 <sup>-4</sup>   | <0.001    | 26           | IVW      |             |
|                   |             | BMI (SD)                        | 0.00 (-0.00; 0.00)   | 2.6×10 <sup>-1</sup>   | 0.008     | 27           | IVW      |             |
|                   |             | SBP (mmHg)                      | 0.05 (0.00; 0.10)    | 4.2×10 <sup>-2</sup>   | <0.001    | 27           | IVW      |             |
|                   |             | DBP (mmHg)                      | 0.05 (0.02; 0.07)    | 3.9×10 <sup>-4</sup>   | 0.574     | 27           | IVW      |             |
|                   |             | ECG heart rate (exercise) (BPM) | 1.29 (0.88; 1.71)    | 8.4×10 <sup>-10</sup>  | 0.015     | 31           | MR Egger |             |
|                   |             | ECG load (exercise) (Watts)     | 0.81 (0.33; 1.28)    | 8.2×10 <sup>-4</sup>   | 0.011     | 28           | MR Egger |             |
|                   |             | Asthma (OR)                     | None                 | None                   | None      | None         | None     |             |
|                   |             | CRP (log(mg/L))                 | 0.00 (-0.00; 0.01)   | 4.4×10 <sup>-1</sup>   | 0.029     | 27           | IVW      |             |
|                   |             | eGFR (SD of log(eGFR))          | -0.00 (-0.00; -0.00) | 8.5×10 <sup>-7</sup>   | 0.007     | 30           | IVW      |             |
|                   |             | BUN (mg/dl)                     | 0.00 (0.00; 0.00)    | 1.6×10 <sup>-3</sup>   | 0.005     | 27           | IVW      |             |
|                   |             | CKD (OR)                        | 1.06 (1.01; 1.11)    | 2.1×10 <sup>-2</sup>   | 0.123     | 29           | MR Egger |             |
|                   |             | Alzheimer's (OR)                | 1.01 (1.01; 1.02)    | 1.3×10 <sup>-15</sup>  | 0.005     | 24           | IVW      |             |
|                   |             | Parkinson's (OR)                | 1.04 (1.00; 1.08)    | 6.9×10 <sup>-2</sup>   | 0.043     | 23           | IVW      |             |
|                   |             | Lewy body dementia (OR)         | 1.37 (1.29; 1.46)    | 1.0×10 <sup>-100</sup> | 0.014     | 21           | IVW      |             |
|                   |             | Breast cancer (OR)              | 0.93 (0.87; 1.00)    | 5.7×10 <sup>-2</sup>   | 0.417     | 25           | MR Egger |             |

**Table S16:** Phenome-wide drug target MR scan of proteins with a prioritized CMR association. (*continued*)

| Protein (uniprot) | Protein set | Trait                           | Estimate (95%CI)     | P-value              | Q p-value | No. Variants | MR model | PQT1 source |
|-------------------|-------------|---------------------------------|----------------------|----------------------|-----------|--------------|----------|-------------|
|                   |             | Lung cancer (OR)                | 1.23 (1.04; 1.46)    | 1.4×10 <sup>-2</sup> | 0.588     | 26           | MR Egger |             |
|                   |             | Colon cancer (OR)               | 1.10 (1.04; 1.15)    | 2.5×10 <sup>-4</sup> | 0.857     | 27           | IWV      |             |
|                   |             | Prostate cancer (OR)            | 0.96 (0.89; 1.04)    | 3.1×10 <sup>-1</sup> | 0.896     | 28           | MR Egger |             |
| NET1 (O95631)     | Concordant  | HF (OR)                         | 1.02 (1.00; 1.04)    | 2.5×10 <sup>-2</sup> | 0.244     | 27           | IWV      | Interval    |
|                   |             | Non-ischemic CM (OR)            | 0.93 (0.83; 1.04)    | 1.8×10 <sup>-1</sup> | 0.024     | 29           | MR Egger |             |
|                   |             | DCM (OR)                        | 1.00 (0.88; 1.14)    | 9.9×10 <sup>-1</sup> | 0.524     | 32           | MR Egger |             |
|                   |             | AF (OR)                         | 0.99 (0.97; 1.00)    | 9.4×10 <sup>-2</sup> | 0.011     | 26           | IWV      |             |
|                   |             | CHD (OR)                        | 1.01 (0.98; 1.04)    | 6.0×10 <sup>-1</sup> | 0.274     | 30           | MR Egger |             |
|                   |             | clMT (mm)                       | 0.00 (-0.00; 0.00)   | 9.3×10 <sup>-1</sup> | 0.161     | 28           | IWV      |             |
|                   |             | Carotid plaque (OR)             | 1.00 (0.94; 1.06)    | 9.1×10 <sup>-1</sup> | 0.809     | 30           | MR Egger |             |
|                   |             | Any stroke (OR)                 | 0.97 (0.95; 1.00)    | 2.8×10 <sup>-2</sup> | 0.003     | 22           | IWV      |             |
|                   |             | Any ischemic stroke (OR)        | 0.98 (0.96; 1.01)    | 1.8×10 <sup>-1</sup> | <0.001    | 23           | IWV      |             |
|                   |             | LDL cholesterol (mmol/l)        | -0.01 (-0.01; -0.00) | 2.8×10 <sup>-5</sup> | 0.063     | 31           | IWV      |             |
|                   |             | Apolipoprotein B (g/l)          | -0.00 (-0.00; -0.00) | 1.3×10 <sup>-2</sup> | 0.441     | 32           | MR Egger |             |
|                   |             | Triglycerides (mmol/l)          | -0.00 (-0.00; 0.00)  | 9.8×10 <sup>-1</sup> | <0.001    | 26           | IWV      |             |
|                   |             | Cholesterol (mmol/l)            | -0.01 (-0.02; 0.00)  | 1.3×10 <sup>-1</sup> | 0.559     | 33           | MR Egger |             |
|                   |             | HDL cholesterol (mmol/l)        | -0.00 (-0.00; 0.00)  | 5.1×10 <sup>-1</sup> | <0.001    | 27           | IWV      |             |
|                   |             | Apolipoprotein A1 (g/l)         | -0.00 (-0.00; -0.00) | 1.7×10 <sup>-2</sup> | 0.002     | 28           | IWV      |             |
|                   |             | Glucose (mmol/l)                | 0.00 (-0.01; 0.01)   | 6.3×10 <sup>-1</sup> | 0.002     | 30           | MR Egger |             |
|                   |             | Glycated haemoglobin (mmol/mol) | -0.02 (-0.09; 0.04)  | 4.3×10 <sup>-1</sup> | 0.226     | 31           | MR Egger |             |
|                   |             | T2DM (OR)                       | 1.02 (1.00; 1.03)    | 1.2×10 <sup>-2</sup> | 0.011     | 28           | IWV      |             |
|                   |             | BMI (SD)                        | 0.00 (-0.00; 0.00)   | 8.6×10 <sup>-1</sup> | <0.001    | 29           | IWV      |             |
|                   |             | SBP (mmHg)                      | 0.17 (0.07; 0.27)    | 5.4×10 <sup>-4</sup> | <0.001    | 31           | MR Egger |             |
|                   |             | DBP (mmHg)                      | 0.06 (0.02; 0.11)    | 9.3×10 <sup>-3</sup> | 0.074     | 24           | IWV      |             |
|                   |             | ECG heart rate (exercise) (BPM) | -0.13 (-0.27; 0.01)  | 6.1×10 <sup>-2</sup> | 0.318     | 30           | IWV      |             |
|                   |             | ECG load (exercise) (Watts)     | -0.25 (-0.62; 0.13)  | 2.0×10 <sup>-1</sup> | 0.267     | 29           | MR Egger |             |
|                   |             | Asthma (OR)                     | None                 | None                 | None      | None         | None     |             |
|                   |             | CRP (log(mg/L))                 | 0.02 (0.01; 0.03)    | 1.6×10 <sup>-6</sup> | 0.003     | 27           | IWV      |             |
|                   |             | eGFR (SD of log(eGFR))          | -0.00 (-0.00; -0.00) | 6.2×10 <sup>-7</sup> | 0.289     | 29           | MR Egger |             |
|                   |             | BUN (mg/dl)                     | 0.00 (-0.00; 0.00)   | 1.3×10 <sup>-1</sup> | 0.006     | 27           | IWV      |             |
|                   |             | CKD (OR)                        | 1.03 (0.99; 1.06)    | 1.1×10 <sup>-1</sup> | 0.499     | 30           | MR Egger |             |
|                   |             | Alzheimer's (OR)                | 1.00 (0.99; 1.01)    | 6.6×10 <sup>-1</sup> | 0.002     | 30           | MR Egger |             |
|                   |             | Parkinson's (OR)                | 0.99 (0.92; 1.06)    | 6.8×10 <sup>-1</sup> | 0.003     | 32           | MR Egger |             |
|                   |             | Lewy body dementia (OR)         | 0.96 (0.90; 1.03)    | 2.4×10 <sup>-1</sup> | 0.341     | 30           | IWV      |             |
|                   |             | Breast cancer (OR)              | 0.97 (0.95; 0.99)    | 3.2×10 <sup>-3</sup> | <0.001    | 28           | IWV      |             |
|                   |             | Lung cancer (OR)                | 1.04 (0.98; 1.11)    | 2.3×10 <sup>-1</sup> | 0.086     | 28           | IWV      |             |
|                   |             | Colon cancer (OR)               | 0.95 (0.91; 1.00)    | 3.8×10 <sup>-2</sup> | <0.001    | 26           | IWV      |             |
|                   |             | Prostate cancer (OR)            | 1.13 (1.07; 1.19)    | 6.1×10 <sup>-6</sup> | 0.323     | 31           | MR Egger |             |
| OSMR (Q99650)     | Concordant  | HF (OR)                         | 1.02 (0.98; 1.06)    | 2.5×10 <sup>-1</sup> | 0.804     | 8            | IWV      | Interval    |
|                   |             | Non-ischemic CM (OR)            | 0.83 (0.67; 1.02)    | 8.2×10 <sup>-2</sup> | 0.253     | 7            | IWV      |             |
|                   |             | DCM (OR)                        | 1.44 (0.83; 2.49)    | 1.9×10 <sup>-1</sup> | 0.445     | 9            | MR Egger |             |
|                   |             | AF (OR)                         | 1.01 (0.97; 1.04)    | 6.8×10 <sup>-1</sup> | 0.923     | 8            | IWV      |             |
|                   |             | CHD (OR)                        | 1.12 (1.00; 1.25)    | 4.8×10 <sup>-2</sup> | 0.757     | 9            | MR Egger |             |
|                   |             | clMT (mm)                       | 0.00 (-0.00; 0.01)   | 7.3×10 <sup>-2</sup> | 0.670     | 8            | IWV      |             |
|                   |             | Carotid plaque (OR)             | 1.14 (1.05; 1.23)    | 1.8×10 <sup>-3</sup> | 0.465     | 8            | IWV      |             |
|                   |             | Any stroke (OR)                 | 1.01 (0.96; 1.06)    | 7.7×10 <sup>-1</sup> | 0.996     | 8            | IWV      |             |
|                   |             | Any ischemic stroke (OR)        | 0.98 (0.93; 1.03)    | 3.3×10 <sup>-1</sup> | 0.981     | 8            | IWV      |             |
|                   |             | LDL cholesterol (mmol/l)        | -0.03 (-0.07; 0.00)  | 9.1×10 <sup>-2</sup> | 0.102     | 9            | MR Egger |             |
|                   |             | Apolipoprotein B (g/l)          | -0.00 (-0.00; 0.00)  | 1.3×10 <sup>-1</sup> | <0.001    | 6            | IWV      |             |
|                   |             | Triglycerides (mmol/l)          | -0.01 (-0.02; 0.01)  | 4.2×10 <sup>-1</sup> | 0.055     | 8            | IWV      |             |
|                   |             | Cholesterol (mmol/l)            | 0.00 (-0.01; 0.02)   | 4.6×10 <sup>-1</sup> | 0.299     | 8            | IWV      |             |
|                   |             | HDL cholesterol (mmol/l)        | -0.02 (-0.03; 0.00)  | 6.1×10 <sup>-2</sup> | 0.329     | 8            | MR Egger |             |
|                   |             | Apolipoprotein A1 (g/l)         | -0.01 (-0.02; 0.00)  | 1.3×10 <sup>-1</sup> | 0.129     | 8            | MR Egger |             |
|                   |             | Glucose (mmol/l)                | -0.02 (-0.03; -0.00) | 2.8×10 <sup>-2</sup> | 0.387     | 8            | IWV      |             |
|                   |             | Glycated haemoglobin (mmol/mol) | 0.12 (-0.10; 0.35)   | 2.8×10 <sup>-1</sup> | 0.271     | 9            | MR Egger |             |
|                   |             | T2DM (OR)                       | 1.07 (1.03; 1.11)    | 5.0×10 <sup>-4</sup> | 0.297     | 7            | IWV      |             |
|                   |             | BMI (SD)                        | 0.01 (-0.01; 0.02)   | 2.5×10 <sup>-1</sup> | 0.124     | 6            | IWV      |             |
|                   |             | SBP (mmHg)                      | -0.13 (-0.36; 0.11)  | 2.9×10 <sup>-1</sup> | 0.062     | 7            | IWV      |             |
|                   |             | DBP (mmHg)                      | -0.08 (-0.18; 0.01)  | 9.1×10 <sup>-2</sup> | <0.001    | 7            | IWV      |             |
|                   |             | ECG heart rate (exercise) (BPM) | -0.32 (-0.79; 0.15)  | 1.8×10 <sup>-1</sup> | 0.160     | 8            | IWV      |             |
|                   |             | ECG load (exercise) (Watts)     | -0.56 (-1.08; -0.05) | 3.2×10 <sup>-2</sup> | 0.181     | 8            | IWV      |             |
|                   |             | Asthma (OR)                     | 1.02 (0.99; 1.04)    | 2.1×10 <sup>-1</sup> | 0.904     | 8            | IWV      |             |
|                   |             | CRP (log(mg/L))                 | -0.01 (-0.04; 0.02)  | 5.5×10 <sup>-1</sup> | 0.061     | 8            | IWV      |             |
|                   |             | eGFR (SD of log(eGFR))          | 0.00 (-0.00; 0.00)   | 1.5×10 <sup>-1</sup> | 0.014     | 7            | IWV      |             |
|                   |             | BUN (mg/dl)                     | -0.01 (-0.03; 0.01)  | 3.6×10 <sup>-1</sup> | 0.007     | 6            | MR Egger |             |
|                   |             | CKD (OR)                        | 0.96 (0.91; 1.01)    | 9.0×10 <sup>-2</sup> | 0.457     | 7            | IWV      |             |

**Table S16:** Phenome-wide drug target MR scan of proteins with a prioritized CMR association. (*continued*)

| Protein (uniprot) | Protein set | Trait                           | Estimate (95%CI)     | P-value                | Q p-value | No. Variants | MR model | PQTL source |
|-------------------|-------------|---------------------------------|----------------------|------------------------|-----------|--------------|----------|-------------|
|                   |             | Alzheimer's (OR)                | 0.99 (0.98; 1.00)    | 5.3×10 <sup>-2</sup>   | 0.699     | 9            | IVW      |             |
|                   |             | Parkinson's (OR)                | 0.99 (0.89; 1.10)    | 7.8×10 <sup>-1</sup>   | 0.384     | 7            | IVW      |             |
|                   |             | Lewy body dementia (OR)         | 1.10 (0.92; 1.32)    | 2.9×10 <sup>-1</sup>   | 0.880     | 9            | IVW      |             |
|                   |             | Breast cancer (OR)              | 1.09 (1.04; 1.14)    | 6.8×10 <sup>-4</sup>   | 0.566     | 8            | IVW      |             |
|                   |             | Lung cancer (OR)                | 1.00 (0.87; 1.14)    | 9.8×10 <sup>-1</sup>   | 0.335     | 8            | IVW      |             |
|                   |             | Colon cancer (OR)               | 0.94 (0.83; 1.07)    | 3.6×10 <sup>-1</sup>   | 0.143     | 8            | IVW      |             |
|                   |             | Prostate cancer (OR)            | 1.11 (1.05; 1.19)    | 8.6×10 <sup>-4</sup>   | 0.003     | 8            | IVW      |             |
| PATE4 (POC8F1)    | Concordant  | HF (OR)                         | 1.00 (0.98; 1.01)    | 6.5×10 <sup>-1</sup>   | 0.439     | 21           | IVW      | Interval    |
|                   |             | Non-ischemic CM (OR)            | 1.13 (1.07; 1.19)    | 4.8×10 <sup>-6</sup>   | 0.200     | 21           | IVW      |             |
|                   |             | DCM (OR)                        | 1.05 (0.99; 1.11)    | 9.6×10 <sup>-2</sup>   | 0.043     | 23           | IVW      |             |
|                   |             | AF (OR)                         | 0.95 (0.92; 0.99)    | 4.1×10 <sup>-3</sup>   | 0.080     | 24           | MR Egger |             |
|                   |             | CHD (OR)                        | 0.93 (0.87; 1.00)    | 4.0×10 <sup>-2</sup>   | 0.069     | 20           | MR Egger |             |
|                   |             | clMT (mm)                       | -0.00 (-0.00; -0.00) | 3.0×10 <sup>-4</sup>   | 0.397     | 21           | IVW      |             |
|                   |             | Carotid plaque (OR)             | 1.11 (1.07; 1.15)    | 3.1×10 <sup>-9</sup>   | 0.399     | 18           | IVW      |             |
|                   |             | Any stroke (OR)                 | 1.01 (0.99; 1.02)    | 4.0×10 <sup>-1</sup>   | 0.290     | 22           | IVW      |             |
|                   |             | Any ischemic stroke (OR)        | 0.99 (0.97; 1.01)    | 5.4×10 <sup>-1</sup>   | 0.002     | 19           | IVW      |             |
|                   |             | LDL cholesterol (mmol/l)        | -0.01 (-0.01; -0.01) | 1.0×10 <sup>-100</sup> | <0.001    | 27           | IVW      |             |
|                   |             | Apolipoprotein B (g/l)          | -0.00 (-0.00; -0.00) | 1.2×10 <sup>-13</sup>  | <0.001    | 29           | IVW      |             |
|                   |             | Triglycerides (mmol/l)          | 0.01 (0.01; 0.02)    | 1.0×10 <sup>-10</sup>  | 0.158     | 25           | IVW      |             |
|                   |             | Cholesterol (mmol/l)            | -0.01 (-0.03; -0.00) | 1.0×10 <sup>-2</sup>   | <0.001    | 28           | MR Egger |             |
|                   |             | HDL cholesterol (mmol/l)        | -0.01 (-0.02; -0.01) | 1.0×10 <sup>-8</sup>   | <0.001    | 19           | MR Egger |             |
|                   |             | Apolipoprotein A1 (g/l)         | -0.00 (-0.00; -0.00) | 2.8×10 <sup>-2</sup>   | <0.001    | 18           | IVW      |             |
|                   |             | Glucose (mmol/l)                | 0.01 (-0.01; 0.02)   | 3.6×10 <sup>-1</sup>   | <0.001    | 21           | MR Egger |             |
|                   |             | Glycated haemoglobin (mmol/mol) | 0.03 (-0.06; 0.12)   | 5.0×10 <sup>-1</sup>   | 0.059     | 26           | MR Egger |             |
|                   |             | T2DM (OR)                       | 1.01 (1.00; 1.02)    | 9.0×10 <sup>-2</sup>   | 0.003     | 17           | IVW      |             |
|                   |             | BMI (SD)                        | 0.01 (0.01; 0.02)    | 7.8×10 <sup>-11</sup>  | 0.352     | 16           | IVW      |             |
|                   |             | SBP (mmHg)                      | -0.27 (-0.34; -0.21) | 1.0×10 <sup>-100</sup> | <0.001    | 19           | IVW      |             |
|                   |             | DBP (mmHg)                      | -0.18 (-0.24; -0.13) | 1.1×10 <sup>-11</sup>  | 0.028     | 24           | MR Egger |             |
|                   |             | ECG heart rate (exercise) (BPM) | -0.42 (-0.82; -0.03) | 3.6×10 <sup>-2</sup>   | 0.211     | 29           | MR Egger |             |
|                   |             | ECG load (exercise) (Watts)     | -0.61 (-0.72; -0.50) | 1.0×10 <sup>-100</sup> | <0.001    | 28           | IVW      |             |
|                   |             | Asthma (OR)                     | 1.01 (1.01; 1.02)    | 1.3×10 <sup>-4</sup>   | 0.005     | 33           | IVW      |             |
|                   |             | CRP (log(mg/L))                 | -0.02 (-0.02; -0.01) | 1.7×10 <sup>-9</sup>   | 0.818     | 24           | IVW      |             |
|                   |             | eGFR (SD of log(eGFR))          | 0.00 (0.00; 0.00)    | 1.4×10 <sup>-3</sup>   | 0.002     | 20           | IVW      |             |
|                   |             | BUN (mg/dl)                     | -0.01 (-0.01; -0.00) | 4.9×10 <sup>-3</sup>   | 0.555     | 18           | MR Egger |             |
|                   |             | CKD (OR)                        | 0.99 (0.97; 1.00)    | 6.1×10 <sup>-2</sup>   | 0.032     | 20           | IVW      |             |
|                   |             | Alzheimer's (OR)                | 1.00 (0.99; 1.01)    | 5.5×10 <sup>-1</sup>   | 0.077     | 24           | MR Egger |             |
|                   |             | Parkinson's (OR)                | 1.05 (1.00; 1.11)    | 7.4×10 <sup>-2</sup>   | 0.027     | 25           | MR Egger |             |
|                   |             | Lewy body dementia (OR)         | 0.82 (0.70; 0.97)    | 1.9×10 <sup>-2</sup>   | 0.046     | 22           | MR Egger |             |
|                   |             | Breast cancer (OR)              | 0.97 (0.93; 1.02)    | 2.7×10 <sup>-1</sup>   | 0.255     | 22           | MR Egger |             |
|                   |             | Lung cancer (OR)                | 1.56 (1.31; 1.86)    | 4.3×10 <sup>-7</sup>   | 0.021     | 19           | MR Egger |             |
|                   |             | Colon cancer (OR)               | 1.17 (1.05; 1.29)    | 3.6×10 <sup>-3</sup>   | 0.228     | 22           | MR Egger |             |
|                   |             | Prostate cancer (OR)            | 0.86 (0.81; 0.92)    | 9.6×10 <sup>-6</sup>   | 0.169     | 21           | MR Egger |             |
| PGLT1 (Q8NBL1)    | Concordant  | HF (OR)                         | 1.10 (1.06; 1.13)    | 2.3×10 <sup>-8</sup>   | 0.387     | 9            | IVW      | Interval    |
|                   |             | Non-ischemic CM (OR)            | 0.62 (0.45; 0.85)    | 3.0×10 <sup>-3</sup>   | 0.522     | 10           | MR Egger |             |
|                   |             | DCM (OR)                        | 0.72 (0.61; 0.85)    | 8.4×10 <sup>-5</sup>   | 0.967     | 10           | IVW      |             |
|                   |             | AF (OR)                         | 1.01 (0.95; 1.08)    | 6.7×10 <sup>-1</sup>   | 0.037     | 10           | MR Egger |             |
|                   |             | CHD (OR)                        | 1.04 (0.96; 1.12)    | 3.4×10 <sup>-1</sup>   | 0.870     | 10           | MR Egger |             |
|                   |             | clMT (mm)                       | -0.00 (-0.00; 0.00)  | 2.3×10 <sup>-1</sup>   | 0.623     | 9            | IVW      |             |
|                   |             | Carotid plaque (OR)             | 1.02 (0.95; 1.10)    | 5.8×10 <sup>-1</sup>   | 0.041     | 8            | IVW      |             |
|                   |             | Any stroke (OR)                 | 1.01 (0.96; 1.07)    | 5.8×10 <sup>-1</sup>   | 0.054     | 9            | IVW      |             |
|                   |             | Any ischemic stroke (OR)        | 1.05 (1.00; 1.11)    | 3.7×10 <sup>-2</sup>   | 0.130     | 9            | IVW      |             |
|                   |             | LDL cholesterol (mmol/l)        | -0.01 (-0.02; -0.00) | 4.5×10 <sup>-3</sup>   | 0.021     | 10           | IVW      |             |
|                   |             | Apolipoprotein B (g/l)          | -0.00 (-0.00; 0.00)  | 5.1×10 <sup>-1</sup>   | 0.297     | 10           | IVW      |             |
|                   |             | Triglycerides (mmol/l)          | 0.02 (-0.00; 0.05)   | 5.6×10 <sup>-2</sup>   | 0.274     | 11           | MR Egger |             |
|                   |             | Cholesterol (mmol/l)            | -0.01 (-0.02; 0.00)  | 1.2×10 <sup>-1</sup>   | 0.111     | 11           | IVW      |             |
|                   |             | HDL cholesterol (mmol/l)        | -0.01 (-0.02; 0.00)  | 7.8×10 <sup>-2</sup>   | 0.078     | 11           | MR Egger |             |
|                   |             | Apolipoprotein A1 (g/l)         | 0.01 (0.00; 0.01)    | 1.1×10 <sup>-5</sup>   | 0.024     | 9            | IVW      |             |
|                   |             | Glucose (mmol/l)                | 0.01 (-0.01; 0.02)   | 2.9×10 <sup>-1</sup>   | 0.498     | 9            | IVW      |             |
|                   |             | Glycated haemoglobin (mmol/mol) | -0.23 (-0.39; -0.08) | 3.0×10 <sup>-3</sup>   | 0.272     | 11           | MR Egger |             |
|                   |             | T2DM (OR)                       | 1.04 (1.01; 1.08)    | 7.5×10 <sup>-3</sup>   | 0.029     | 8            | IVW      |             |
|                   |             | BMI (SD)                        | -0.06 (-0.09; -0.02) | 2.2×10 <sup>-3</sup>   | 0.337     | 7            | MR Egger |             |
|                   |             | SBP (mmHg)                      | -0.11 (-0.23; 0.02)  | 9.7×10 <sup>-2</sup>   | 0.444     | 10           | IVW      |             |
|                   |             | DBP (mmHg)                      | -0.34 (-0.50; -0.19) | 1.7×10 <sup>-5</sup>   | 0.894     | 10           | MR Egger |             |
|                   |             | ECG heart rate (exercise) (BPM) | 1.07 (0.28; 1.87)    | 7.7×10 <sup>-3</sup>   | 0.994     | 11           | MR Egger |             |
|                   |             | ECG load (exercise) (Watts)     | 1.63 (0.67; 2.59)    | 8.5×10 <sup>-4</sup>   | 0.311     | 11           | MR Egger |             |
|                   |             | Asthma (OR)                     | 0.96 (0.93; 0.99)    | 3.1×10 <sup>-3</sup>   | 0.353     | 9            | IVW      |             |



**Table S16:** Phenome-wide drug target MR scan of proteins with a prioritized CMR association. (*continued*)

| Protein (uniprot) | Protein set | Trait                           | Estimate (95%CI)     | P-value                | Q p-value | No. Variants | MR model | PQT1 source |
|-------------------|-------------|---------------------------------|----------------------|------------------------|-----------|--------------|----------|-------------|
|                   |             | CRP (log(mg/L))                 | 0.01 (-0.01; 0.02)   | 4.6×10 <sup>-1</sup>   | 0.666     | 9            | IVW      |             |
|                   |             | eGFR (SD of log(eGFR))          | 0.00 (0.00; 0.01)    | 3.1×10 <sup>-7</sup>   | 0.145     | 9            | IVW      |             |
|                   |             | BUN (mg/dl)                     | -0.01 (-0.01; -0.00) | 2.8×10 <sup>-3</sup>   | 0.221     | 10           | IVW      |             |
|                   |             | CKD (OR)                        | 1.05 (1.02; 1.10)    | 5.5×10 <sup>-3</sup>   | 0.604     | 9            | IVW      |             |
|                   |             | Alzheimer's (OR)                | 0.99 (0.97; 1.01)    | 4.6×10 <sup>-1</sup>   | 0.314     | 9            | MR Egger |             |
|                   |             | Parkinson's (OR)                | 1.15 (1.05; 1.25)    | 1.7×10 <sup>-3</sup>   | 0.441     | 9            | IVW      |             |
|                   |             | Lewy body dementia (OR)         | 0.77 (0.66; 0.89)    | 6.0×10 <sup>-4</sup>   | 0.970     | 10           | IVW      |             |
|                   |             | Breast cancer (OR)              | 1.03 (0.98; 1.08)    | 2.7×10 <sup>-1</sup>   | 0.048     | 8            | IVW      |             |
|                   |             | Lung cancer (OR)                | 1.16 (1.03; 1.30)    | 1.4×10 <sup>-2</sup>   | 0.564     | 10           | IVW      |             |
|                   |             | Colon cancer (OR)               | 1.12 (1.02; 1.23)    | 2.1×10 <sup>-2</sup>   | 0.855     | 10           | IVW      |             |
|                   |             | Prostate cancer (OR)            | 0.93 (0.87; 0.99)    | 2.7×10 <sup>-2</sup>   | 0.281     | 10           | IVW      |             |
| PPAC (P24666)     | Concordant  | HF (OR)                         | 1.00 (1.00; 1.01)    | 1.9×10 <sup>-1</sup>   | 0.076     | 38           | IVW      | Interval    |
|                   |             | Non-ischemic CM (OR)            | 0.94 (0.89; 0.98)    | 7.0×10 <sup>-3</sup>   | 0.603     | 43           | MR Egger |             |
|                   |             | DCM (OR)                        | 0.97 (0.95; 1.00)    | 2.8×10 <sup>-2</sup>   | <0.001    | 29           | IVW      |             |
|                   |             | AF (OR)                         | 1.02 (1.01; 1.02)    | 1.9×10 <sup>-13</sup>  | 0.075     | 45           | IVW      |             |
|                   |             | CHD (OR)                        | 1.00 (1.00; 1.01)    | 6.1×10 <sup>-1</sup>   | 0.146     | 36           | IVW      |             |
|                   |             | cIMT (mm)                       | 0.00 (0.00; 0.00)    | 6.3×10 <sup>-3</sup>   | 0.037     | 41           | MR Egger |             |
|                   |             | Carotid plaque (OR)             | 1.04 (1.03; 1.05)    | 9.8×10 <sup>-11</sup>  | 0.027     | 42           | IVW      |             |
|                   |             | Any stroke (OR)                 | 1.01 (1.00; 1.02)    | 2.9×10 <sup>-2</sup>   | 0.078     | 38           | IVW      |             |
|                   |             | Any ischemic stroke (OR)        | 1.03 (1.00; 1.05)    | 1.5×10 <sup>-2</sup>   | 0.071     | 42           | MR Egger |             |
|                   |             | LDL cholesterol (mmol/l)        | 0.00 (0.00; 0.01)    | 8.6×10 <sup>-3</sup>   | 0.479     | 42           | MR Egger |             |
|                   |             | Apolipoprotein B (g/l)          | 0.00 (0.00; 0.00)    | 2.5×10 <sup>-2</sup>   | 0.365     | 42           | MR Egger |             |
|                   |             | Triglycerides (mmol/l)          | -0.01 (-0.01; -0.01) | 1.0×10 <sup>-100</sup> | 0.019     | 37           | IVW      |             |
|                   |             | Cholesterol (mmol/l)            | 0.01 (0.00; 0.01)    | 1.8×10 <sup>-3</sup>   | 0.195     | 43           | MR Egger |             |
|                   |             | HDL cholesterol (mmol/l)        | 0.00 (-0.00; 0.00)   | 1.1×10 <sup>-1</sup>   | 0.191     | 44           | MR Egger |             |
|                   |             | Apolipoprotein A1 (g/l)         | 0.00 (-0.00; 0.00)   | 5.9×10 <sup>-2</sup>   | 0.411     | 44           | MR Egger |             |
|                   |             | Glucose (mmol/l)                | 0.01 (0.00; 0.01)    | 5.3×10 <sup>-4</sup>   | 0.030     | 43           | MR Egger |             |
|                   |             | Glycated haemoglobin (mmol/mol) | 0.05 (0.02; 0.08)    | 3.4×10 <sup>-4</sup>   | 0.092     | 41           | MR Egger |             |
|                   |             | T2DM (OR)                       | 1.00 (0.99; 1.01)    | 8.5×10 <sup>-1</sup>   | 0.095     | 40           | MR Egger |             |
|                   |             | BMI (SD)                        | -0.01 (-0.01; 0.00)  | 8.3×10 <sup>-2</sup>   | <0.001    | 27           | MR Egger |             |
|                   |             | SBP (mmHg)                      | 0.10 (0.06; 0.15)    | 1.0×10 <sup>-5</sup>   | 0.159     | 17           | IVW      |             |
|                   |             | DBP (mmHg)                      | 0.02 (-0.01; 0.05)   | 1.4×10 <sup>-1</sup>   | 0.285     | 26           | MR Egger |             |
|                   |             | ECG heart rate (exercise) (BPM) | 0.16 (0.04; 0.29)    | 9.0×10 <sup>-3</sup>   | <0.001    | 41           | MR Egger |             |
|                   |             | ECG load (exercise) (Watts)     | -0.14 (-0.27; 0.00)  | 5.0×10 <sup>-2</sup>   | <0.001    | 43           | MR Egger |             |
|                   |             | Asthma (OR)                     | None                 | None                   | None      | None         | None     |             |
|                   |             | CRP (log(mg/L))                 | 0.00 (-0.00; 0.01)   | 4.3×10 <sup>-1</sup>   | 0.930     | 26           | MR Egger |             |
|                   |             | eGFR (SD of log(eGFR))          | -0.00 (-0.00; -0.00) | 1.0×10 <sup>-100</sup> | 0.172     | 41           | IVW      |             |
|                   |             | BUN (mg/dl)                     | 0.00 (0.00; 0.00)    | 6.9×10 <sup>-4</sup>   | 0.221     | 39           | MR Egger |             |
|                   |             | CKD (OR)                        | 1.02 (1.02; 1.03)    | 1.9×10 <sup>-12</sup>  | 0.008     | 39           | IVW      |             |
|                   |             | Alzheimer's (OR)                | 0.99 (0.99; 1.00)    | 1.0×10 <sup>-100</sup> | <0.001    | 42           | IVW      |             |
|                   |             | Parkinson's (OR)                | 1.05 (1.02; 1.09)    | 4.9×10 <sup>-4</sup>   | 0.714     | 43           | MR Egger |             |
|                   |             | Lewy body dementia (OR)         | 1.09 (1.03; 1.16)    | 3.0×10 <sup>-3</sup>   | 0.005     | 42           | MR Egger |             |
|                   |             | Breast cancer (OR)              | 1.01 (0.99; 1.03)    | 2.1×10 <sup>-1</sup>   | 0.006     | 43           | MR Egger |             |
|                   |             | Lung cancer (OR)                | 0.97 (0.95; 0.99)    | 6.0×10 <sup>-3</sup>   | 0.454     | 44           | IVW      |             |
|                   |             | Colon cancer (OR)               | 0.97 (0.96; 0.99)    | 3.8×10 <sup>-4</sup>   | <0.001    | 42           | IVW      |             |
|                   |             | Prostate cancer (OR)            | 0.97 (0.95; 0.99)    | 7.1×10 <sup>-3</sup>   | 0.044     | 45           | MR Egger |             |
| PRDX1 (Q06830)    | Concordant  | HF (OR)                         | 1.07 (0.97; 1.16)    | 1.6×10 <sup>-1</sup>   | 0.909     | 2            | IVW      | Interval    |
|                   |             | Non-ischemic CM (OR)            | 1.14 (0.71; 1.83)    | 5.9×10 <sup>-1</sup>   | 0.196     | 2            | IVW      |             |
|                   |             | DCM (OR)                        | 1.17 (0.60; 2.31)    | 6.5×10 <sup>-1</sup>   | 0.148     | 2            | IVW      |             |
|                   |             | AF (OR)                         | 0.97 (0.90; 1.05)    | 4.2×10 <sup>-1</sup>   | 0.436     | 2            | IVW      |             |
|                   |             | CHD (OR)                        | 0.98 (0.89; 1.08)    | 6.8×10 <sup>-1</sup>   | 0.851     | 2            | IVW      |             |
|                   |             | cIMT (mm)                       | 0.01 (-0.00; 0.02)   | 7.6×10 <sup>-2</sup>   | 0.910     | 2            | IVW      |             |
|                   |             | Carotid plaque (OR)             | 0.94 (0.77; 1.16)    | 5.8×10 <sup>-1</sup>   | 0.630     | 2            | IVW      |             |
|                   |             | Any stroke (OR)                 | 1.14 (1.02; 1.27)    | 2.4×10 <sup>-2</sup>   | 0.462     | 2            | IVW      |             |
|                   |             | Any ischemic stroke (OR)        | 1.06 (0.94; 1.19)    | 3.5×10 <sup>-1</sup>   | 0.604     | 2            | IVW      |             |
|                   |             | LDL cholesterol (mmol/l)        | -0.02 (-0.03; 0.00)  | 8.3×10 <sup>-2</sup>   | 0.528     | 3            | IVW      |             |
|                   |             | Apolipoprotein B (g/l)          | 0.00 (-0.01; 0.01)   | 9.0×10 <sup>-1</sup>   | 0.254     | 3            | IVW      |             |
|                   |             | Triglycerides (mmol/l)          | 0.00 (-0.02; 0.03)   | 7.4×10 <sup>-1</sup>   | 0.146     | 3            | IVW      |             |
|                   |             | Cholesterol (mmol/l)            | -0.01 (-0.03; 0.01)  | 2.9×10 <sup>-1</sup>   | 0.490     | 3            | IVW      |             |
|                   |             | HDL cholesterol (mmol/l)        | 0.01 (0.00; 0.02)    | 1.9×10 <sup>-2</sup>   | 0.860     | 3            | IVW      |             |
|                   |             | Apolipoprotein A1 (g/l)         | 0.01 (0.00; 0.02)    | 1.5×10 <sup>-4</sup>   | 0.655     | 3            | IVW      |             |
|                   |             | Glucose (mmol/l)                | -0.02 (-0.04; 0.01)  | 2.2×10 <sup>-1</sup>   | 0.387     | 3            | IVW      |             |
|                   |             | Glycated haemoglobin (mmol/mol) | 0.89 (0.38; 1.40)    | 6.7×10 <sup>-4</sup>   | 0.007     | 3            | MR Egger |             |
|                   |             | T2DM (OR)                       | 1.09 (0.98; 1.21)    | 1.0×10 <sup>-1</sup>   | 0.137     | 2            | IVW      |             |
|                   |             | BMI (SD)                        | 0.02 (-0.00; 0.04)   | 6.1×10 <sup>-2</sup>   | 0.912     | 2            | IVW      |             |
|                   |             | SBP (mmHg)                      | 0.65 (0.31; 1.00)    | 1.7×10 <sup>-4</sup>   | 0.449     | 2            | IVW      |             |

**Table S16:** Phenome-wide drug target MR scan of proteins with a prioritized CMR association. (*continued*)

| Protein (uniprot) | Protein set | Trait                           | Estimate (95%CI)     | P-value                | Q p-value | No. Variants | MR model | PQTL source |
|-------------------|-------------|---------------------------------|----------------------|------------------------|-----------|--------------|----------|-------------|
|                   |             | DBP (mmHg)                      | 0.16 (-0.11; 0.42)   | 2.4×10 <sup>-1</sup>   | 0.172     | 2            | IWW      |             |
|                   |             | ECG heart rate (exercise) (BPM) | 0.93 (0.20; 1.66)    | 1.2×10 <sup>-2</sup>   | 0.889     | 3            | IWW      |             |
|                   |             | ECG load (exercise) (Watts)     | 0.43 (-0.68; 1.54)   | 4.5×10 <sup>-1</sup>   | 0.156     | 3            | IWW      |             |
|                   |             | Asthma (OR)                     | 0.97 (0.91; 1.04)    | 4.5×10 <sup>-1</sup>   | 0.151     | 3            | IWW      |             |
|                   |             | CRP (log(mg/L))                 | 0.11 (0.06; 0.16)    | 4.8×10 <sup>-5</sup>   | 0.919     | 2            | IWW      |             |
|                   |             | eGFR (SD of log(eGFR))          | 0.02 (0.01; 0.03)    | 5.2×10 <sup>-10</sup>  | 0.106     | 2            | IWW      |             |
|                   |             | BUN (mg/dl)                     | -0.00 (-0.01; 0.01)  | 6.7×10 <sup>-1</sup>   | 0.674     | 2            | IWW      |             |
|                   |             | CKD (OR)                        | 0.83 (0.75; 0.93)    | 1.1×10 <sup>-3</sup>   | 0.529     | 2            | IWW      |             |
|                   |             | Alzheimer's (OR)                | 1.02 (1.00; 1.05)    | 6.2×10 <sup>-2</sup>   | 0.429     | 2            | IWW      |             |
|                   |             | Parkinson's (OR)                | 0.92 (0.74; 1.14)    | 4.5×10 <sup>-1</sup>   | 0.616     | 2            | IWW      |             |
|                   |             | Lewy body dementia (OR)         | 0.47 (0.32; 0.71)    | 3.1×10 <sup>-4</sup>   | 0.441     | 2            | IWW      |             |
|                   |             | Breast cancer (OR)              | 1.39 (1.21; 1.59)    | 2.2×10 <sup>-6</sup>   | 0.275     | 2            | IWW      |             |
|                   |             | Lung cancer (OR)                | 1.25 (0.90; 1.73)    | 1.8×10 <sup>-1</sup>   | 0.750     | 2            | IWW      |             |
|                   |             | Colon cancer (OR)               | 1.01 (0.63; 1.62)    | 9.6×10 <sup>-1</sup>   | 0.072     | 2            | IWW      |             |
|                   |             | Prostate cancer (OR)            | 1.06 (0.90; 1.24)    | 5.1×10 <sup>-1</sup>   | 0.413     | 2            | IWW      |             |
| RMD1 (Q96DB5)     | Concordant  | HF (OR)                         | 1.00 (0.99; 1.02)    | 6.5×10 <sup>-1</sup>   | 0.799     | 4            | IWW      | Interval    |
|                   |             | Non-ischemic CM (OR)            | 1.08 (0.99; 1.17)    | 7.9×10 <sup>-2</sup>   | 0.487     | 4            | IWW      |             |
|                   |             | DCM (OR)                        | 1.01 (0.73; 1.38)    | 9.7×10 <sup>-1</sup>   | 0.946     | 4            | IWW      |             |
|                   |             | AF (OR)                         | 1.01 (0.96; 1.05)    | 7.9×10 <sup>-1</sup>   | 0.961     | 6            | IWW      |             |
|                   |             | CHD (OR)                        | 1.00 (0.98; 1.01)    | 4.9×10 <sup>-1</sup>   | 0.525     | 5            | IWW      |             |
|                   |             | ciMT (mm)                       | -0.00 (-0.00; -0.00) | 9.2×10 <sup>-3</sup>   | 0.303     | 4            | IWW      |             |
|                   |             | Carotid plaque (OR)             | 0.98 (0.94; 1.02)    | 2.9×10 <sup>-1</sup>   | 0.947     | 4            | IWW      |             |
|                   |             | Any stroke (OR)                 | 0.96 (0.94; 0.98)    | 2.4×10 <sup>-4</sup>   | 0.773     | 4            | IWW      |             |
|                   |             | Any ischemic stroke (OR)        | 0.96 (0.94; 0.99)    | 3.7×10 <sup>-3</sup>   | 0.930     | 4            | IWW      |             |
|                   |             | LDL cholesterol (mmol/l)        | 0.03 (0.02; 0.03)    | 6.2×10 <sup>-14</sup>  | 0.522     | 6            | IWW      |             |
|                   |             | Apolipoprotein B (g/l)          | 0.01 (0.00; 0.02)    | 1.6×10 <sup>-2</sup>   | 0.783     | 6            | MR Egger |             |
|                   |             | Triglycerides (mmol/l)          | 0.11 (0.05; 0.16)    | 3.9×10 <sup>-4</sup>   | 0.180     | 6            | MR Egger |             |
|                   |             | Cholesterol (mmol/l)            | 0.03 (0.02; 0.04)    | 2.3×10 <sup>-11</sup>  | 0.730     | 6            | IWW      |             |
|                   |             | HDL cholesterol (mmol/l)        | 0.00 (-0.00; 0.01)   | 9.9×10 <sup>-2</sup>   | 0.397     | 6            | IWW      |             |
|                   |             | Apolipoprotein A1 (g/l)         | 0.00 (0.00; 0.01)    | 1.1×10 <sup>-3</sup>   | 0.741     | 6            | IWW      |             |
|                   |             | Glucose (mmol/l)                | 0.15 (0.09; 0.21)    | 1.0×10 <sup>-6</sup>   | 0.697     | 6            | MR Egger |             |
|                   |             | Glycated haemoglobin (mmol/mol) | 0.51 (0.21; 0.81)    | 8.3×10 <sup>-4</sup>   | 0.497     | 6            | MR Egger |             |
|                   |             | T2DM (OR)                       | 1.19 (0.95; 1.49)    | 1.3×10 <sup>-1</sup>   | 0.578     | 4            | MR Egger |             |
|                   |             | BMI (SD)                        | 0.01 (-0.08; 0.09)   | 8.8×10 <sup>-1</sup>   | 0.181     | 4            | MR Egger |             |
|                   |             | SBP (mmHg)                      | -0.13 (-0.24; -0.02) | 1.6×10 <sup>-2</sup>   | 0.107     | 4            | IWW      |             |
|                   |             | DBP (mmHg)                      | -0.02 (-0.06; 0.03)  | 4.6×10 <sup>-1</sup>   | 0.351     | 4            | IWW      |             |
|                   |             | ECG heart rate (exercise) (BPM) | -0.46 (-0.75; -0.17) | 2.0×10 <sup>-3</sup>   | 0.953     | 6            | IWW      |             |
|                   |             | ECG load (exercise) (Watts)     | 0.72 (0.40; 1.05)    | 1.4×10 <sup>-5</sup>   | 0.773     | 6            | IWW      |             |
|                   |             | Asthma (OR)                     | 0.97 (0.96; 0.99)    | 1.6×10 <sup>-3</sup>   | 0.049     | 8            | IWW      |             |
|                   |             | CRP (log(mg/L))                 | -0.00 (-0.01; 0.01)  | 8.9×10 <sup>-1</sup>   | 0.899     | 4            | IWW      |             |
|                   |             | eGFR (SD of log(eGFR))          | -0.01 (-0.01; -0.00) | 1.0×10 <sup>-100</sup> | 0.072     | 4            | IWW      |             |
|                   |             | BUN (mg/dl)                     | -0.00 (-0.00; -0.00) | 4.9×10 <sup>-2</sup>   | 0.860     | 4            | IWW      |             |
|                   |             | CKD (OR)                        | 1.06 (1.02; 1.09)    | 1.3×10 <sup>-3</sup>   | 0.095     | 4            | IWW      |             |
|                   |             | Alzheimer's (OR)                | 0.99 (0.95; 1.03)    | 5.4×10 <sup>-1</sup>   | 0.273     | 3            | IWW      |             |
|                   |             | Parkinson's (OR)                | 0.94 (0.89; 0.99)    | 3.1×10 <sup>-2</sup>   | 0.774     | 4            | IWW      |             |
|                   |             | Lewy body dementia (OR)         | 1.08 (1.00; 1.17)    | 6.0×10 <sup>-2</sup>   | 0.102     | 5            | IWW      |             |
|                   |             | Breast cancer (OR)              | 1.08 (1.04; 1.11)    | 7.1×10 <sup>-7</sup>   | 0.870     | 4            | IWW      |             |
|                   |             | Lung cancer (OR)                | 1.13 (1.08; 1.18)    | 4.1×10 <sup>-7</sup>   | 0.790     | 5            | IWW      |             |
|                   |             | Colon cancer (OR)               | 1.21 (1.14; 1.29)    | 3.5×10 <sup>-10</sup>  | 0.521     | 4            | IWW      |             |
|                   |             | Prostate cancer (OR)            | 1.03 (1.01; 1.06)    | 1.8×10 <sup>-2</sup>   | 0.361     | 5            | IWW      |             |
| SPA12 (Q8IW75)    | Concordant  | HF (OR)                         | 1.00 (0.98; 1.03)    | 7.1×10 <sup>-1</sup>   | 0.015     | 16           | IWW      | Interval    |
|                   |             | Non-ischemic CM (OR)            | 1.32 (1.06; 1.65)    | 1.5×10 <sup>-2</sup>   | 0.002     | 18           | MR Egger |             |
|                   |             | DCM (OR)                        | 1.02 (0.92; 1.13)    | 7.3×10 <sup>-1</sup>   | 0.523     | 17           | IWW      |             |
|                   |             | AF (OR)                         | 1.03 (0.98; 1.08)    | 2.1×10 <sup>-1</sup>   | 0.452     | 18           | MR Egger |             |
|                   |             | CHD (OR)                        | 1.05 (1.03; 1.06)    | 4.0×10 <sup>-9</sup>   | 0.014     | 17           | IWW      |             |
|                   |             | ciMT (mm)                       | 0.01 (0.00; 0.01)    | 9.0×10 <sup>-6</sup>   | 0.231     | 17           | IWW      |             |
|                   |             | Carotid plaque (OR)             | 0.90 (0.81; 1.01)    | 6.7×10 <sup>-2</sup>   | 0.713     | 19           | MR Egger |             |
|                   |             | Any stroke (OR)                 | 1.03 (1.00; 1.06)    | 2.7×10 <sup>-2</sup>   | 0.639     | 16           | IWW      |             |
|                   |             | Any ischemic stroke (OR)        | 1.03 (0.99; 1.06)    | 1.4×10 <sup>-1</sup>   | 0.142     | 15           | IWW      |             |
|                   |             | LDL cholesterol (mmol/l)        | 0.00 (-0.01; 0.02)   | 6.9×10 <sup>-1</sup>   | 0.145     | 20           | MR Egger |             |
|                   |             | Apolipoprotein B (g/l)          | 0.00 (-0.00; 0.01)   | 7.0×10 <sup>-1</sup>   | 0.140     | 20           | MR Egger |             |
|                   |             | Triglycerides (mmol/l)          | 0.01 (-0.01; 0.03)   | 3.6×10 <sup>-1</sup>   | 0.290     | 20           | MR Egger |             |
|                   |             | Cholesterol (mmol/l)            | -0.00 (-0.01; 0.00)  | 7.1×10 <sup>-1</sup>   | 0.092     | 19           | IWW      |             |
|                   |             | HDL cholesterol (mmol/l)        | -0.01 (-0.02; -0.00) | 1.8×10 <sup>-2</sup>   | 0.738     | 20           | MR Egger |             |
|                   |             | Apolipoprotein A1 (g/l)         | -0.00 (-0.01; 0.00)  | 9.0×10 <sup>-2</sup>   | 0.492     | 20           | MR Egger |             |
|                   |             | Glucose (mmol/l)                | -0.01 (-0.04; 0.01)  | 3.5×10 <sup>-1</sup>   | 0.434     | 19           | MR Egger |             |

**Table S16:** Phenome-wide drug target MR scan of proteins with a prioritized CMR association. (*continued*)

| Protein (uniprot) | Protein set | Trait                           | Estimate (95%CI)     | P-value                | Q p-value | No. Variants | MR model | PQTL source |
|-------------------|-------------|---------------------------------|----------------------|------------------------|-----------|--------------|----------|-------------|
|                   |             | Glycated haemoglobin (mmol/mol) | -0.03 (-0.15; 0.09)  | 6.5×10 <sup>-1</sup>   | 0.625     | 19           | MR Egger |             |
|                   |             | T2DM (OR)                       | 1.00 (0.98; 1.03)    | 6.4×10 <sup>-1</sup>   | 0.217     | 16           | IWV      |             |
|                   |             | BMI (SD)                        | 0.01 (0.00; 0.01)    | 5.9×10 <sup>-6</sup>   | 0.261     | 18           | IWV      |             |
|                   |             | SBP (mmHg)                      | -0.28 (-0.53; -0.04) | 2.5×10 <sup>-2</sup>   | 0.099     | 19           | MR Egger |             |
|                   |             | DBP (mmHg)                      | -0.11 (-0.22; 0.01)  | 7.7×10 <sup>-2</sup>   | 0.698     | 19           | MR Egger |             |
|                   |             | ECG heart rate (exercise) (BPM) | 0.01 (-0.22; 0.24)   | 9.3×10 <sup>-1</sup>   | 0.099     | 18           | IWV      |             |
|                   |             | ECG load (exercise) (Watts)     | 0.44 (0.23; 0.65)    | 4.9×10 <sup>-5</sup>   | 0.033     | 18           | IWV      |             |
|                   |             | Asthma (OR)                     | 1.00 (0.99; 1.01)    | 4.6×10 <sup>-1</sup>   | 0.465     | 20           | IWV      |             |
|                   |             | CRP (log(mg/L))                 | 0.02 (0.01; 0.03)    | 2.1×10 <sup>-5</sup>   | 0.674     | 17           | IWV      |             |
|                   |             | eGFR (SD of log(eGFR))          | 0.00 (0.00; 0.01)    | 5.2×10 <sup>-3</sup>   | 0.824     | 18           | MR Egger |             |
|                   |             | BUN (mg/dl)                     | 0.00 (-0.00; 0.00)   | 9.8×10 <sup>-1</sup>   | 0.621     | 17           | IWV      |             |
|                   |             | CKD (OR)                        | 0.98 (0.91; 1.06)    | 6.6×10 <sup>-1</sup>   | 0.152     | 17           | MR Egger |             |
|                   |             | Alzheimer's (OR)                | 1.00 (0.99; 1.00)    | 1.8×10 <sup>-1</sup>   | 0.437     | 17           | IWV      |             |
|                   |             | Parkinson's (OR)                | 0.86 (0.74; 1.00)    | 4.4×10 <sup>-2</sup>   | 0.324     | 18           | MR Egger |             |
|                   |             | Lewy body dementia (OR)         | 1.22 (1.13; 1.32)    | 2.2×10 <sup>-7</sup>   | 0.296     | 16           | IWV      |             |
|                   |             | Breast cancer (OR)              | 0.96 (0.93; 0.99)    | 5.2×10 <sup>-3</sup>   | 0.018     | 15           | IWV      |             |
|                   |             | Lung cancer (OR)                | 1.00 (0.93; 1.09)    | 9.1×10 <sup>-1</sup>   | 0.034     | 15           | IWV      |             |
|                   |             | Colon cancer (OR)               | 0.97 (0.91; 1.04)    | 3.6×10 <sup>-1</sup>   | 0.088     | 18           | IWV      |             |
|                   |             | Prostate cancer (OR)            | 1.12 (1.08; 1.15)    | 7.8×10 <sup>-10</sup>  | 0.347     | 18           | IWV      |             |
| TPSNR (Q9BX59)    | Concordant  | HF (OR)                         | 0.99 (0.98; 1.00)    | 1.8×10 <sup>-2</sup>   | 0.002     | 47           | IWV      | Interval    |
|                   |             | Non-ischemic CM (OR)            | 0.98 (0.94; 1.01)    | 1.7×10 <sup>-1</sup>   | 0.029     | 44           | IWV      |             |
|                   |             | DCM (OR)                        | 0.96 (0.92; 1.01)    | 1.5×10 <sup>-1</sup>   | 0.087     | 36           | IWV      |             |
|                   |             | AF (OR)                         | 1.00 (0.98; 1.01)    | 8.3×10 <sup>-1</sup>   | 0.036     | 50           | MR Egger |             |
|                   |             | CHD (OR)                        | 1.00 (0.98; 1.02)    | 9.5×10 <sup>-1</sup>   | 0.431     | 49           | MR Egger |             |
|                   |             | clMT (mm)                       | 0.00 (0.00; 0.00)    | 4.5×10 <sup>-2</sup>   | 0.002     | 46           | IWV      |             |
|                   |             | Carotid plaque (OR)             | 0.98 (0.95; 1.01)    | 2.3×10 <sup>-1</sup>   | 0.578     | 45           | MR Egger |             |
|                   |             | Any stroke (OR)                 | 1.01 (0.99; 1.02)    | 5.9×10 <sup>-1</sup>   | <0.001    | 46           | MR Egger |             |
|                   |             | Any ischemic stroke (OR)        | 1.02 (1.00; 1.04)    | 1.3×10 <sup>-1</sup>   | <0.001    | 45           | MR Egger |             |
|                   |             | LDL cholesterol (mmol/l)        | 0.00 (0.00; 0.00)    | 8.7×10 <sup>-4</sup>   | 0.436     | 61           | IWV      |             |
|                   |             | Apolipoprotein B (g/l)          | 0.00 (-0.00; 0.00)   | 8.5×10 <sup>-2</sup>   | 0.182     | 61           | IWV      |             |
|                   |             | Triglycerides (mmol/l)          | -0.01 (-0.01; -0.01) | 1.0×10 <sup>-100</sup> | <0.001    | 54           | IWV      |             |
|                   |             | Cholesterol (mmol/l)            | 0.00 (0.00; 0.00)    | 4.8×10 <sup>-3</sup>   | <0.001    | 59           | IWV      |             |
|                   |             | HDL cholesterol (mmol/l)        | 0.00 (0.00; 0.00)    | 1.0×10 <sup>-4</sup>   | <0.001    | 49           | MR Egger |             |
|                   |             | Apolipoprotein A1 (g/l)         | 0.00 (0.00; 0.00)    | 3.1×10 <sup>-13</sup>  | <0.001    | 51           | MR Egger |             |
|                   |             | Glucose (mmol/l)                | 0.00 (-0.00; 0.01)   | 4.0×10 <sup>-1</sup>   | 0.077     | 53           | MR Egger |             |
|                   |             | Glycated haemoglobin (mmol/mol) | -0.00 (-0.01; 0.01)  | 4.8×10 <sup>-1</sup>   | <0.001    | 56           | IWV      |             |
|                   |             | T2DM (OR)                       | 1.02 (1.00; 1.03)    | 5.4×10 <sup>-2</sup>   | <0.001    | 42           | MR Egger |             |
|                   |             | BMI (SD)                        | 0.00 (-0.00; 0.00)   | 3.7×10 <sup>-1</sup>   | 0.381     | 42           | IWV      |             |
|                   |             | SBP (mmHg)                      | -0.00 (-0.03; 0.03)  | 8.8×10 <sup>-1</sup>   | 0.004     | 35           | IWV      |             |
|                   |             | DBP (mmHg)                      | 0.03 (0.01; 0.05)    | 1.3×10 <sup>-3</sup>   | <0.001    | 34           | IWV      |             |
|                   |             | ECG heart rate (exercise) (BPM) | -0.22 (-0.31; -0.12) | 6.0×10 <sup>-6</sup>   | 0.114     | 60           | MR Egger |             |
|                   |             | ECG load (exercise) (Watts)     | 0.07 (0.01; 0.12)    | 1.3×10 <sup>-2</sup>   | 0.438     | 60           | IWV      |             |
|                   |             | Asthma (OR)                     | 1.01 (1.00; 1.01)    | 4.0×10 <sup>-4</sup>   | 0.016     | 51           | IWV      |             |
|                   |             | CRP (log(mg/L))                 | 0.01 (-0.00; 0.02)   | 5.7×10 <sup>-2</sup>   | 0.062     | 44           | MR Egger |             |
|                   |             | eGFR (SD of log(eGFR))          | -0.00 (-0.00; 0.00)  | 5.9×10 <sup>-1</sup>   | 0.210     | 43           | MR Egger |             |
|                   |             | BUN (mg/dl)                     | -0.00 (-0.00; -0.00) | 1.9×10 <sup>-4</sup>   | 0.006     | 42           | IWV      |             |
|                   |             | CKD (OR)                        | 0.99 (0.97; 1.01)    | 4.7×10 <sup>-1</sup>   | 0.035     | 45           | MR Egger |             |
|                   |             | Alzheimer's (OR)                | 1.00 (1.00; 1.01)    | 7.1×10 <sup>-5</sup>   | 0.003     | 47           | IWV      |             |
|                   |             | Parkinson's (OR)                | 0.96 (0.94; 0.98)    | 1.1×10 <sup>-3</sup>   | 0.063     | 43           | IWV      |             |
|                   |             | Lewy body dementia (OR)         | 1.00 (0.95; 1.06)    | 8.7×10 <sup>-1</sup>   | 0.246     | 44           | MR Egger |             |
|                   |             | Breast cancer (OR)              | 0.97 (0.96; 0.98)    | 3.0×10 <sup>-6</sup>   | 0.009     | 48           | IWV      |             |
|                   |             | Lung cancer (OR)                | 1.01 (0.98; 1.05)    | 4.5×10 <sup>-1</sup>   | 0.017     | 47           | IWV      |             |
|                   |             | Colon cancer (OR)               | 1.04 (1.01; 1.07)    | 1.1×10 <sup>-2</sup>   | 0.002     | 48           | IWV      |             |
|                   |             | Prostate cancer (OR)            | 0.98 (0.96; 1.00)    | 1.6×10 <sup>-2</sup>   | 0.371     | 46           | IWV      |             |
| TREM1 (Q9NP99)    | Concordant  | HF (OR)                         | 0.97 (0.93; 1.01)    | 9.4×10 <sup>-2</sup>   | 0.099     | 29           | MR Egger | Interval    |
|                   |             | Non-ischemic CM (OR)            | 1.12 (0.98; 1.27)    | 9.5×10 <sup>-2</sup>   | 0.050     | 27           | MR Egger |             |
|                   |             | DCM (OR)                        | 1.32 (1.11; 1.57)    | 2.0×10 <sup>-3</sup>   | 0.002     | 27           | MR Egger |             |
|                   |             | AF (OR)                         | 1.03 (1.01; 1.05)    | 3.6×10 <sup>-3</sup>   | 0.208     | 29           | MR Egger |             |
|                   |             | CHD (OR)                        | 1.01 (1.00; 1.02)    | 1.7×10 <sup>-1</sup>   | 0.063     | 30           | IWV      |             |
|                   |             | clMT (mm)                       | -0.00 (-0.00; -0.00) | 6.2×10 <sup>-4</sup>   | 0.234     | 29           | IWV      |             |
|                   |             | Carotid plaque (OR)             | 0.97 (0.95; 0.99)    | 5.9×10 <sup>-4</sup>   | 0.191     | 29           | IWV      |             |
|                   |             | Any stroke (OR)                 | 0.96 (0.93; 1.00)    | 5.7×10 <sup>-2</sup>   | 0.018     | 28           | MR Egger |             |
|                   |             | Any ischemic stroke (OR)        | 0.99 (0.96; 1.03)    | 7.6×10 <sup>-1</sup>   | <0.001    | 29           | MR Egger |             |
|                   |             | LDL cholesterol (mmol/l)        | 0.01 (0.00; 0.01)    | 2.3×10 <sup>-4</sup>   | 0.180     | 31           | MR Egger |             |
|                   |             | Apolipoprotein B (g/l)          | 0.00 (0.00; 0.00)    | 1.2×10 <sup>-2</sup>   | 0.232     | 31           | MR Egger |             |
|                   |             | Triglycerides (mmol/l)          | -0.00 (-0.01; -0.00) | 4.3×10 <sup>-2</sup>   | 0.061     | 27           | IWV      |             |

**Table S16:** Phenome-wide drug target MR scan of proteins with a prioritized CMR association. (*continued*)

| Protein (uniprot) | Protein set | Trait                           | Estimate (95%CI)      | P-value                | Q p-value | No. Variants | MR model | PQTL source |
|-------------------|-------------|---------------------------------|-----------------------|------------------------|-----------|--------------|----------|-------------|
|                   |             | Cholesterol (mmol/l)            | 0.01 (0.00; 0.02)     | 4.9×10 <sup>-4</sup>   | 0.117     | 30           | MR Egger |             |
|                   |             | HDL cholesterol (mmol/l)        | -0.00 (-0.01; 0.00)   | 2.5×10 <sup>-1</sup>   | 0.549     | 26           | MR Egger |             |
|                   |             | Apolipoprotein A1 (g/l)         | -0.00 (-0.00; 0.00)   | 5.8×10 <sup>-1</sup>   | 0.167     | 27           | MR Egger |             |
|                   |             | Glucose (mmol/l)                | 0.00 (-0.00; 0.01)    | 2.1×10 <sup>-1</sup>   | 0.007     | 26           | MR Egger |             |
|                   |             | Glycated haemoglobin (mmol/mol) | 0.05 (0.03; 0.06)     | 6.4×10 <sup>-7</sup>   | 0.146     | 29           | IWV      |             |
|                   |             | T2DM (OR)                       | 1.01 (1.00; 1.02)     | 8.3×10 <sup>-2</sup>   | 0.160     | 28           | IWV      |             |
|                   |             | BMI (SD)                        | -0.00 (-0.01; 0.00)   | 2.6×10 <sup>-1</sup>   | <0.001    | 19           | IWV      |             |
|                   |             | SBP (mmHg)                      | -0.16 (-0.27; -0.06)  | 1.9×10 <sup>-3</sup>   | 0.678     | 28           | MR Egger |             |
|                   |             | DBP (mmHg)                      | -0.04 (-0.07; -0.01)  | 4.5×10 <sup>-3</sup>   | <0.001    | 25           | IWV      |             |
|                   |             | ECG heart rate (exercise) (BPM) | 0.34 (0.21; 0.47)     | 2.0×10 <sup>-7</sup>   | 0.079     | 25           | IWV      |             |
|                   |             | ECG load (exercise) (Watts)     | 0.09 (-0.04; 0.22)    | 1.9×10 <sup>-1</sup>   | 0.074     | 30           | IWV      |             |
|                   |             | Asthma (OR)                     | None                  | None                   | None      | None         | None     |             |
|                   |             | CRP (log(mg/L))                 | -0.01 (-0.03; 0.01)   | 5.1×10 <sup>-1</sup>   | 0.102     | 25           | MR Egger |             |
|                   |             | eGFR (SD of log(eGFR))          | 0.00 (-0.00; 0.00)    | 5.7×10 <sup>-2</sup>   | 0.032     | 26           | MR Egger |             |
|                   |             | BUN (mg/dl)                     | -0.00 (-0.00; 0.00)   | 8.8×10 <sup>-1</sup>   | 0.030     | 25           | IWV      |             |
|                   |             | CKD (OR)                        | 0.95 (0.91; 0.99)     | 1.2×10 <sup>-2</sup>   | 0.248     | 28           | MR Egger |             |
|                   |             | Alzheimer's (OR)                | 1.00 (0.99; 1.01)     | 4.1×10 <sup>-1</sup>   | 0.042     | 28           | MR Egger |             |
|                   |             | Parkinson's (OR)                | 1.00 (0.90; 1.10)     | 9.8×10 <sup>-1</sup>   | 0.120     | 21           | MR Egger |             |
|                   |             | Lewy body dementia (OR)         | 0.96 (0.92; 1.00)     | 6.2×10 <sup>-2</sup>   | 0.040     | 25           | IWV      |             |
|                   |             | Breast cancer (OR)              | 1.03 (1.01; 1.05)     | 5.9×10 <sup>-3</sup>   | 0.435     | 30           | MR Egger |             |
|                   |             | Lung cancer (OR)                | 1.23 (1.14; 1.33)     | 2.2×10 <sup>-7</sup>   | 0.010     | 29           | MR Egger |             |
|                   |             | Colon cancer (OR)               | 1.03 (1.01; 1.06)     | 1.6×10 <sup>-2</sup>   | 0.183     | 30           | IWV      |             |
|                   |             | Prostate cancer (OR)            | 0.96 (0.95; 0.97)     | 1.4×10 <sup>-10</sup>  | <0.001    | 32           | IWV      |             |
| UD16 (P19224)     | Concordant  | HF (OR)                         | 1.03 (1.01; 1.05)     | 3.6×10 <sup>-3</sup>   | 0.047     | 15           | IWV      | Interval    |
|                   |             | Non-ischemic CM (OR)            | 1.10 (1.02; 1.18)     | 8.7×10 <sup>-3</sup>   | 0.322     | 17           | IWV      |             |
|                   |             | DCM (OR)                        | 1.62 (1.46; 1.80)     | 1.0×10 <sup>-100</sup> | 0.055     | 16           | IWV      |             |
|                   |             | AF (OR)                         | 0.95 (0.90; 1.00)     | 4.8×10 <sup>-2</sup>   | 0.685     | 16           | MR Egger |             |
|                   |             | CHD (OR)                        | 1.06 (1.04; 1.08)     | 8.5×10 <sup>-8</sup>   | 0.153     | 15           | IWV      |             |
|                   |             | cIMT (mm)                       | -0.00 (-0.00; -0.00)  | 2.7×10 <sup>-3</sup>   | 0.464     | 16           | IWV      |             |
|                   |             | Carotid plaque (OR)             | 1.01 (0.88; 1.15)     | 9.3×10 <sup>-1</sup>   | 0.754     | 15           | MR Egger |             |
|                   |             | Any stroke (OR)                 | 1.05 (0.97; 1.13)     | 2.4×10 <sup>-1</sup>   | 0.755     | 15           | MR Egger |             |
|                   |             | Any ischemic stroke (OR)        | 1.05 (0.96; 1.14)     | 2.9×10 <sup>-1</sup>   | 0.829     | 15           | MR Egger |             |
|                   |             | LDL cholesterol (mmol/l)        | 0.04 (0.03; 0.04)     | 1.0×10 <sup>-100</sup> | 0.013     | 13           | IWV      |             |
|                   |             | Apolipoprotein B (g/l)          | 0.01 (0.01; 0.01)     | 1.0×10 <sup>-100</sup> | 0.005     | 11           | IWV      |             |
|                   |             | Triglycerides (mmol/l)          | 0.03 (0.03; 0.04)     | 1.0×10 <sup>-100</sup> | 0.087     | 16           | IWV      |             |
|                   |             | Cholesterol (mmol/l)            | 0.08 (0.07; 0.10)     | 1.0×10 <sup>-100</sup> | 0.006     | 17           | MR Egger |             |
|                   |             | HDL cholesterol (mmol/l)        | -0.00 (-0.00; 0.00)   | 3.3×10 <sup>-1</sup>   | 0.062     | 15           | IWV      |             |
|                   |             | Apolipoprotein A1 (g/l)         | 0.00 (0.00; 0.01)     | 4.6×10 <sup>-2</sup>   | 0.063     | 18           | MR Egger |             |
|                   |             | Glucose (mmol/l)                | 0.01 (-0.00; 0.03)    | 1.1×10 <sup>-1</sup>   | 0.625     | 16           | MR Egger |             |
|                   |             | Glycated haemoglobin (mmol/mol) | 0.07 (-0.04; 0.18)    | 1.9×10 <sup>-1</sup>   | 0.161     | 15           | MR Egger |             |
|                   |             | T2DM (OR)                       | 1.01 (0.96; 1.06)     | 7.4×10 <sup>-1</sup>   | 0.459     | 14           | MR Egger |             |
|                   |             | BMI (SD)                        | -0.02 (-0.03; -0.00)  | 3.3×10 <sup>-2</sup>   | 0.168     | 16           | MR Egger |             |
|                   |             | SBP (mmHg)                      | -0.06 (-0.30; 0.18)   | 6.2×10 <sup>-1</sup>   | 0.045     | 15           | MR Egger |             |
|                   |             | DBP (mmHg)                      | 0.11 (0.07; 0.15)     | 6.0×10 <sup>-7</sup>   | <0.001    | 15           | IWV      |             |
|                   |             | ECG heart rate (exercise) (BPM) | 0.05 (-0.16; 0.25)    | 6.5×10 <sup>-1</sup>   | 0.171     | 16           | IWV      |             |
|                   |             | ECG load (exercise) (Watts)     | -0.36 (-0.94; 0.23)   | 2.3×10 <sup>-1</sup>   | 0.655     | 17           | MR Egger |             |
|                   |             | Asthma (OR)                     | 1.02 (0.98; 1.06)     | 2.6×10 <sup>-1</sup>   | 0.735     | 18           | MR Egger |             |
|                   |             | CRP (log(mg/L))                 | -0.01 (-0.02; 0.00)   | 7.3×10 <sup>-2</sup>   | 0.968     | 15           | IWV      |             |
|                   |             | eGFR (SD of log(eGFR))          | -0.00 (-0.00; 0.00)   | 9.8×10 <sup>-1</sup>   | 0.043     | 15           | MR Egger |             |
|                   |             | BUN (mg/dl)                     | -0.00 (-0.00; 0.00)   | 2.4×10 <sup>-1</sup>   | 0.418     | 15           | IWV      |             |
|                   |             | CKD (OR)                        | 1.14 (1.04; 1.24)     | 4.6×10 <sup>-3</sup>   | 0.144     | 15           | MR Egger |             |
|                   |             | Alzheimer's (OR)                | 1.01 (0.98; 1.03)     | 5.6×10 <sup>-1</sup>   | 0.070     | 15           | MR Egger |             |
|                   |             | Parkinson's (OR)                | 1.02 (0.97; 1.06)     | 4.9×10 <sup>-1</sup>   | 0.003     | 15           | IWV      |             |
|                   |             | Lewy body dementia (OR)         | 1.25 (1.14; 1.36)     | 1.4×10 <sup>-6</sup>   | 0.034     | 15           | IWV      |             |
|                   |             | Breast cancer (OR)              | 1.08 (0.99; 1.19)     | 9.5×10 <sup>-2</sup>   | 0.869     | 14           | MR Egger |             |
|                   |             | Lung cancer (OR)                | 0.95 (0.71; 1.27)     | 7.4×10 <sup>-1</sup>   | 0.066     | 16           | MR Egger |             |
|                   |             | Colon cancer (OR)               | 0.95 (0.75; 1.19)     | 6.4×10 <sup>-1</sup>   | 0.093     | 16           | MR Egger |             |
|                   |             | Prostate cancer (OR)            | 1.03 (0.92; 1.16)     | 5.8×10 <sup>-1</sup>   | 0.475     | 16           | MR Egger |             |
| EGFR (P00533)     | Nearest     | HF (OR)                         | 1.08 (0.48; 2.43)     | 8.5×10 <sup>-1</sup>   | 0.328     | 5            | MR Egger | Interval    |
|                   |             | Non-ischemic CM (OR)            | 1.08 (0.87; 1.35)     | 4.9×10 <sup>-1</sup>   | 0.299     | 5            | IWV      |             |
|                   |             | DCM (OR)                        | 10.76 (0.05; 2155.83) | 3.8×10 <sup>-1</sup>   | 0.191     | 5            | MR Egger |             |
|                   |             | AF (OR)                         | 0.99 (0.93; 1.05)     | 6.8×10 <sup>-1</sup>   | 0.009     | 6            | IWV      |             |
|                   |             | CHD (OR)                        | 0.89 (0.83; 0.95)     | 8.8×10 <sup>-4</sup>   | 0.036     | 6            | IWV      |             |
|                   |             | cIMT (mm)                       | 0.09 (0.03; 0.16)     | 7.5×10 <sup>-3</sup>   | 0.357     | 5            | MR Egger |             |
|                   |             | Carotid plaque (OR)             | 0.93 (0.84; 1.04)     | 1.9×10 <sup>-1</sup>   | 0.380     | 5            | IWV      |             |
|                   |             | Any stroke (OR)                 | 0.97 (0.92; 1.03)     | 3.5×10 <sup>-1</sup>   | 0.515     | 5            | IWV      |             |

**Table S16:** Phenome-wide drug target MR scan of proteins with a prioritized CMR association. (*continued*)

| Protein (uniprot) | Protein set | Trait                           | Estimate (95%CI)     | P-value                | Q p-value | No. Variants | MR model | PQTL source |
|-------------------|-------------|---------------------------------|----------------------|------------------------|-----------|--------------|----------|-------------|
|                   |             | Any ischemic stroke (OR)        | 0.99 (0.93; 1.05)    | 7.3×10 <sup>-1</sup>   | 0.769     | 5            | IWV      |             |
|                   |             | LDL cholesterol (mmol/l)        | 0.02 (-0.00; 0.03)   | 5.4×10 <sup>-2</sup>   | 0.624     | 6            | IWV      |             |
|                   |             | Apolipoprotein B (g/l)          | 0.00 (-0.00; 0.01)   | 1.7×10 <sup>-1</sup>   | 0.296     | 6            | IWV      |             |
|                   |             | Triglycerides (mmol/l)          | -0.01 (-0.03; 0.01)  | 4.6×10 <sup>-1</sup>   | 0.007     | 6            | IWV      |             |
|                   |             | Cholesterol (mmol/l)            | 0.02 (0.00; 0.04)    | 4.6×10 <sup>-2</sup>   | 0.678     | 6            | IWV      |             |
|                   |             | HDL cholesterol (mmol/l)        | 0.01 (-0.00; 0.01)   | 1.1×10 <sup>-1</sup>   | 0.030     | 6            | IWV      |             |
|                   |             | Apolipoprotein A1 (g/l)         | -0.00 (-0.01; 0.00)  | 8.2×10 <sup>-1</sup>   | 0.018     | 6            | IWV      |             |
|                   |             | Glucose (mmol/l)                | -0.00 (-0.03; 0.02)  | 7.0×10 <sup>-1</sup>   | 0.364     | 6            | IWV      |             |
|                   |             | Glycated haemoglobin (mmol/mol) | -0.65 (-1.08; -0.23) | 2.5×10 <sup>-3</sup>   | 0.731     | 6            | MR Egger |             |
|                   |             | T2DM (OR)                       | 0.93 (0.90; 0.97)    | 1.6×10 <sup>-4</sup>   | 0.917     | 5            | IWV      |             |
|                   |             | BMI (SD)                        | 0.04 (0.03; 0.05)    | 1.5×10 <sup>-11</sup>  | 0.802     | 5            | IWV      |             |
|                   |             | SBP (mmHg)                      | -0.14 (-0.32; 0.04)  | 1.2×10 <sup>-1</sup>   | 0.950     | 5            | IWV      |             |
|                   |             | DBP (mmHg)                      | -0.11 (-0.21; -0.01) | 4.0×10 <sup>-2</sup>   | 0.731     | 5            | IWV      |             |
|                   |             | ECG heart rate (exercise) (BPM) | 0.75 (0.01; 1.50)    | 4.6×10 <sup>-2</sup>   | 0.354     | 6            | IWV      |             |
|                   |             | ECG load (exercise) (Watts)     | 3.06 (-0.00; 6.12)   | 5.0×10 <sup>-2</sup>   | 0.258     | 6            | MR Egger |             |
|                   |             | Asthma (OR)                     | 1.00 (0.94; 1.06)    | 9.6×10 <sup>-1</sup>   | 0.198     | 5            | IWV      |             |
|                   |             | CRP (log(mg/L))                 | 0.02 (-0.01; 0.04)   | 1.9×10 <sup>-1</sup>   | 0.946     | 5            | IWV      |             |
|                   |             | eGFR (SD of log(eGFR))          | 0.00 (0.00; 0.01)    | 4.0×10 <sup>-3</sup>   | 0.500     | 5            | IWV      |             |
|                   |             | BUN (mg/dl)                     | 0.01 (0.00; 0.01)    | 1.0×10 <sup>-2</sup>   | 0.336     | 5            | IWV      |             |
|                   |             | CKD (OR)                        | 1.11 (1.05; 1.17)    | 3.7×10 <sup>-4</sup>   | 0.944     | 5            | IWV      |             |
|                   |             | Alzheimer's (OR)                | 1.02 (1.00; 1.03)    | 5.0×10 <sup>-2</sup>   | 0.803     | 5            | IWV      |             |
|                   |             | Parkinson's (OR)                | 2.50 (0.11; 57.89)   | 5.7×10 <sup>-1</sup>   | 0.079     | 5            | MR Egger |             |
|                   |             | Lewy body dementia (OR)         | 1.45 (1.08; 1.96)    | 1.4×10 <sup>-2</sup>   | 0.593     | 6            | IWV      |             |
|                   |             | Breast cancer (OR)              | 0.97 (0.86; 1.10)    | 6.7×10 <sup>-1</sup>   | 0.110     | 6            | IWV      |             |
|                   |             | Lung cancer (OR)                | 1.18 (0.93; 1.49)    | 1.7×10 <sup>-1</sup>   | 0.015     | 6            | IWV      |             |
|                   |             | Colon cancer (OR)               | 1.15 (0.95; 1.40)    | 1.4×10 <sup>-1</sup>   | 0.428     | 6            | IWV      |             |
|                   |             | Prostate cancer (OR)            | 0.94 (0.83; 1.07)    | 3.6×10 <sup>-1</sup>   | 0.348     | 6            | IWV      |             |
| FA10 (P00742)     | Nearest     | HF (OR)                         | 1.01 (0.96; 1.07)    | 6.3×10 <sup>-1</sup>   | 0.050     | 13           | IWV      | Interval    |
|                   |             | Non-ischemic CM (OR)            | 0.90 (0.82; 0.99)    | 2.9×10 <sup>-2</sup>   | 0.047     | 18           | IWV      |             |
|                   |             | DCM (OR)                        | 1.10 (0.98; 1.23)    | 1.0×10 <sup>-1</sup>   | 0.016     | 17           | IWV      |             |
|                   |             | AF (OR)                         | 0.99 (0.97; 1.01)    | 4.2×10 <sup>-1</sup>   | 0.002     | 18           | IWV      |             |
|                   |             | CHD (OR)                        | 0.99 (0.97; 1.01)    | 3.3×10 <sup>-1</sup>   | 0.447     | 20           | IWV      |             |
|                   |             | cIMT (mm)                       | 0.01 (0.00; 0.01)    | 8.6×10 <sup>-6</sup>   | 0.064     | 20           | IWV      |             |
|                   |             | Carotid plaque (OR)             | 1.07 (0.91; 1.27)    | 3.9×10 <sup>-1</sup>   | 0.163     | 20           | MR Egger |             |
|                   |             | Any stroke (OR)                 | 1.05 (0.97; 1.15)    | 2.3×10 <sup>-1</sup>   | 0.128     | 21           | MR Egger |             |
|                   |             | Any ischemic stroke (OR)        | 1.05 (1.03; 1.08)    | 1.2×10 <sup>-4</sup>   | 0.002     | 20           | IWV      |             |
|                   |             | LDL cholesterol (mmol/l)        | 0.01 (-0.00; 0.01)   | 6.8×10 <sup>-2</sup>   | 0.060     | 19           | IWV      |             |
|                   |             | Apolipoprotein B (g/l)          | 0.00 (-0.00; 0.00)   | 1.5×10 <sup>-1</sup>   | 0.045     | 19           | IWV      |             |
|                   |             | Triglycerides (mmol/l)          | -0.01 (-0.02; 0.01)  | 4.3×10 <sup>-1</sup>   | 0.804     | 21           | MR Egger |             |
|                   |             | Cholesterol (mmol/l)            | 0.02 (0.01; 0.02)    | 2.5×10 <sup>-3</sup>   | 0.088     | 19           | IWV      |             |
|                   |             | HDL cholesterol (mmol/l)        | 0.01 (0.01; 0.01)    | 2.2×10 <sup>-16</sup>  | 0.057     | 21           | IWV      |             |
|                   |             | Apolipoprotein A1 (g/l)         | 0.01 (0.01; 0.01)    | 1.0×10 <sup>-100</sup> | 0.490     | 21           | IWV      |             |
|                   |             | Glucose (mmol/l)                | -0.00 (-0.02; 0.01)  | 6.5×10 <sup>-1</sup>   | 0.766     | 22           | MR Egger |             |
|                   |             | Glycated haemoglobin (mmol/mol) | 0.02 (-0.08; 0.11)   | 7.2×10 <sup>-1</sup>   | 0.966     | 22           | MR Egger |             |
|                   |             | T2DM (OR)                       | 0.99 (0.95; 1.04)    | 7.5×10 <sup>-1</sup>   | 0.449     | 22           | MR Egger |             |
|                   |             | BMI (SD)                        | -0.01 (-0.02; -0.01) | 4.7×10 <sup>-5</sup>   | 0.126     | 17           | IWV      |             |
|                   |             | SBP (mmHg)                      | 0.05 (-0.04; 0.13)   | 2.6×10 <sup>-1</sup>   | 0.270     | 17           | IWV      |             |
|                   |             | DBP (mmHg)                      | -0.04 (-0.10; 0.02)  | 2.0×10 <sup>-1</sup>   | 0.051     | 16           | IWV      |             |
|                   |             | ECG heart rate (exercise) (BPM) | 0.10 (-0.45; 0.65)   | 7.2×10 <sup>-1</sup>   | 0.781     | 22           | MR Egger |             |
|                   |             | ECG load (exercise) (Watts)     | -0.10 (-0.72; 0.51)  | 7.5×10 <sup>-1</sup>   | 0.684     | 22           | MR Egger |             |
|                   |             | Asthma (OR)                     | 0.98 (0.95; 1.02)    | 4.3×10 <sup>-1</sup>   | 0.005     | 22           | MR Egger |             |
|                   |             | CRP (log(mg/L))                 | 0.00 (-0.04; 0.04)   | 9.6×10 <sup>-1</sup>   | 0.810     | 18           | MR Egger |             |
|                   |             | eGFR (SD of log(eGFR))          | 0.00 (0.00; 0.00)    | 1.2×10 <sup>-3</sup>   | 0.864     | 19           | IWV      |             |
|                   |             | BUN (mg/dl)                     | -0.00 (-0.01; 0.00)  | 2.0×10 <sup>-1</sup>   | 0.147     | 19           | IWV      |             |
|                   |             | CKD (OR)                        | 1.00 (0.98; 1.03)    | 9.5×10 <sup>-1</sup>   | 0.757     | 20           | IWV      |             |
|                   |             | Alzheimer's (OR)                | 0.99 (0.99; 1.00)    | 9.5×10 <sup>-2</sup>   | 0.014     | 20           | IWV      |             |
|                   |             | Parkinson's (OR)                | 0.95 (0.90; 1.01)    | 9.3×10 <sup>-2</sup>   | 0.374     | 21           | IWV      |             |
|                   |             | Lewy body dementia (OR)         | 1.22 (1.08; 1.37)    | 1.0×10 <sup>-3</sup>   | 0.715     | 17           | IWV      |             |
|                   |             | Breast cancer (OR)              | 1.04 (0.99; 1.11)    | 1.4×10 <sup>-1</sup>   | 0.188     | 16           | IWV      |             |
|                   |             | Lung cancer (OR)                | 0.88 (0.78; 0.98)    | 1.9×10 <sup>-2</sup>   | 0.954     | 17           | IWV      |             |
|                   |             | Colon cancer (OR)               | 0.89 (0.72; 1.11)    | 3.0×10 <sup>-1</sup>   | 0.644     | 19           | MR Egger |             |
|                   |             | Prostate cancer (OR)            | 0.96 (0.90; 1.02)    | 2.1×10 <sup>-1</sup>   | 0.141     | 17           | IWV      |             |
| IL18 (Q14116)     | Nearest     | HF (OR)                         | 1.02 (0.99; 1.05)    | 2.4×10 <sup>-1</sup>   | 0.340     | 15           | IWV      | Scallop     |
|                   |             | Non-ischemic CM (OR)            | 1.14 (0.72; 1.81)    | 5.8×10 <sup>-1</sup>   | 0.528     | 15           | MR Egger |             |
|                   |             | DCM (OR)                        | 1.49 (0.67; 3.31)    | 3.3×10 <sup>-1</sup>   | 0.491     | 13           | MR Egger |             |
|                   |             | AF (OR)                         | 1.10 (1.04; 1.16)    | 2.7×10 <sup>-4</sup>   | 0.120     | 14           | IWV      |             |

**Table S16:** Phenome-wide drug target MR scan of proteins with a prioritized CMR association. (*continued*)

| Protein (uniprot) | Protein set | Trait                           | Estimate (95%CI)     | P-value               | Q p-value | No. Variants | MR model | PQTL source |
|-------------------|-------------|---------------------------------|----------------------|-----------------------|-----------|--------------|----------|-------------|
|                   |             | CHD (OR)                        | 1.00 (0.97; 1.04)    | 8.0×10 <sup>-1</sup>  | 0.862     | 15           | IVW      |             |
|                   |             | clMT (mm)                       | 0.01 (0.00; 0.01)    | 9.3×10 <sup>-5</sup>  | 0.947     | 16           | IVW      |             |
|                   |             | Carotid plaque (OR)             | 0.87 (0.82; 0.94)    | 1.0×10 <sup>-4</sup>  | 0.628     | 16           | IVW      |             |
|                   |             | Any stroke (OR)                 | 1.10 (0.95; 1.26)    | 2.0×10 <sup>-1</sup>  | 0.985     | 16           | MR Egger |             |
|                   |             | Any ischemic stroke (OR)        | 1.09 (0.93; 1.28)    | 2.9×10 <sup>-1</sup>  | 0.357     | 16           | MR Egger |             |
|                   |             | LDL cholesterol (mmol/l)        | -0.01 (-0.04; 0.03)  | 7.2×10 <sup>-1</sup>  | 0.467     | 15           | MR Egger |             |
|                   |             | Apolipoprotein B (g/l)          | -0.01 (-0.01; -0.01) | 4.3×10 <sup>-12</sup> | 0.660     | 15           | IVW      |             |
|                   |             | Triglycerides (mmol/l)          | -0.02 (-0.03; -0.01) | 4.0×10 <sup>-7</sup>  | 0.861     | 16           | IVW      |             |
|                   |             | Cholesterol (mmol/l)            | -0.01 (-0.06; 0.03)  | 5.9×10 <sup>-1</sup>  | 0.611     | 15           | MR Egger |             |
|                   |             | HDL cholesterol (mmol/l)        | -0.01 (-0.02; 0.01)  | 5.1×10 <sup>-1</sup>  | 0.355     | 15           | MR Egger |             |
|                   |             | Apolipoprotein A1 (g/l)         | 0.00 (0.00; 0.01)    | 1.3×10 <sup>-2</sup>  | 0.415     | 16           | IVW      |             |
|                   |             | Glucose (mmol/l)                | -0.02 (-0.07; 0.03)  | 3.6×10 <sup>-1</sup>  | 0.488     | 15           | MR Egger |             |
|                   |             | Glycated haemoglobin (mmol/mol) | -0.06 (-0.11; -0.00) | 4.7×10 <sup>-2</sup>  | 0.398     | 16           | IVW      |             |
|                   |             | T2DM (OR)                       | 1.02 (0.93; 1.11)    | 7.4×10 <sup>-1</sup>  | 0.495     | 14           | MR Egger |             |
|                   |             | BMI (SD)                        | -0.02 (-0.05; 0.01)  | 2.4×10 <sup>-1</sup>  | 0.077     | 15           | MR Egger |             |
|                   |             | SBP (mmHg)                      | -0.03 (-0.16; 0.09)  | 5.9×10 <sup>-1</sup>  | 0.077     | 12           | IVW      |             |
|                   |             | DBP (mmHg)                      | -0.16 (-0.23; -0.10) | 6.6×10 <sup>-7</sup>  | 0.202     | 13           | IVW      |             |
|                   |             | ECG heart rate (exercise) (BPM) | -1.13 (-2.93; 0.66)  | 2.2×10 <sup>-1</sup>  | 0.113     | 15           | MR Egger |             |
|                   |             | ECG load (exercise) (Watts)     | -0.21 (-0.55; 0.13)  | 2.2×10 <sup>-1</sup>  | 0.978     | 16           | IVW      |             |
|                   |             | Asthma (OR)                     | 1.01 (0.99; 1.03)    | 2.0×10 <sup>-1</sup>  | 0.387     | 17           | IVW      |             |
|                   |             | CRP (log(mg/L))                 | 0.03 (0.02; 0.05)    | 5.7×10 <sup>-5</sup>  | 0.354     | 13           | IVW      |             |
|                   |             | eGFR (SD of log(eGFR))          | -0.00 (-0.01; 0.00)  | 5.3×10 <sup>-1</sup>  | 0.078     | 15           | MR Egger |             |
|                   |             | BUN (mg/dl)                     | -0.01 (-0.01; -0.00) | 7.0×10 <sup>-3</sup>  | 0.258     | 15           | IVW      |             |
|                   |             | CKD (OR)                        | 1.08 (1.04; 1.12)    | 1.6×10 <sup>-4</sup>  | 0.542     | 15           | IVW      |             |
|                   |             | Alzheimer's (OR)                | 1.02 (0.96; 1.07)    | 5.5×10 <sup>-1</sup>  | 0.284     | 15           | MR Egger |             |
|                   |             | Parkinson's (OR)                | 1.08 (1.00; 1.17)    | 4.4×10 <sup>-2</sup>  | 0.646     | 15           | IVW      |             |
|                   |             | Lewy body dementia (OR)         | 1.11 (1.00; 1.24)    | 5.1×10 <sup>-2</sup>  | 0.287     | 15           | IVW      |             |
|                   |             | Breast cancer (OR)              | 1.03 (0.94; 1.13)    | 4.8×10 <sup>-1</sup>  | 0.075     | 11           | IVW      |             |
|                   |             | Lung cancer (OR)                | 0.82 (0.51; 1.30)    | 4.0×10 <sup>-1</sup>  | 0.669     | 13           | MR Egger |             |
|                   |             | Colon cancer (OR)               | 0.89 (0.58; 1.36)    | 5.9×10 <sup>-1</sup>  | 0.226     | 13           | MR Egger |             |
|                   |             | Prostate cancer (OR)            | 0.99 (0.78; 1.26)    | 9.4×10 <sup>-1</sup>  | 0.915     | 13           | MR Egger |             |
| IL6RB (P40189)    | Nearest     | HF (OR)                         | 1.04 (0.96; 1.13)    | 2.8×10 <sup>-1</sup>  | 0.650     | 2            | IVW      | Framingham  |
|                   |             | Non-ischemic CM (OR)            | 1.20 (0.78; 1.86)    | 4.1×10 <sup>-1</sup>  | None      | 1            | Wald     |             |
|                   |             | DCM (OR)                        | 0.69 (0.44; 1.07)    | 9.9×10 <sup>-2</sup>  | 0.293     | 2            | IVW      |             |
|                   |             | AF (OR)                         | 1.09 (1.01; 1.16)    | 1.7×10 <sup>-2</sup>  | 0.484     | 2            | IVW      |             |
|                   |             | CHD (OR)                        | 1.04 (0.91; 1.18)    | 6.1×10 <sup>-1</sup>  | 0.145     | 2            | IVW      |             |
|                   |             | clMT (mm)                       | 0.00 (-0.00; 0.01)   | 4.8×10 <sup>-1</sup>  | 0.680     | 2            | IVW      |             |
|                   |             | Carotid plaque (OR)             | 0.92 (0.75; 1.11)    | 3.8×10 <sup>-1</sup>  | 0.270     | 2            | IVW      |             |
|                   |             | Any stroke (OR)                 | 1.04 (0.91; 1.18)    | 5.8×10 <sup>-1</sup>  | 0.173     | 2            | IVW      |             |
|                   |             | Any ischemic stroke (OR)        | 1.05 (0.90; 1.23)    | 5.5×10 <sup>-1</sup>  | 0.132     | 2            | IVW      |             |
|                   |             | LDL cholesterol (mmol/l)        | -0.00 (-0.02; 0.02)  | 9.2×10 <sup>-1</sup>  | 0.879     | 2            | IVW      |             |
|                   |             | Apolipoprotein B (g/l)          | -0.00 (-0.01; 0.00)  | 5.6×10 <sup>-1</sup>  | 0.940     | 2            | IVW      |             |
|                   |             | Triglycerides (mmol/l)          | -0.04 (-0.06; -0.02) | 1.2×10 <sup>-3</sup>  | 0.568     | 2            | IVW      |             |
|                   |             | Cholesterol (mmol/l)            | 0.00 (-0.02; 0.03)   | 8.9×10 <sup>-1</sup>  | 0.939     | 2            | IVW      |             |
|                   |             | HDL cholesterol (mmol/l)        | 0.01 (0.00; 0.02)    | 2.4×10 <sup>-2</sup>  | 0.983     | 2            | IVW      |             |
|                   |             | Apolipoprotein A1 (g/l)         | 0.00 (-0.00; 0.01)   | 1.8×10 <sup>-1</sup>  | 0.287     | 2            | IVW      |             |
|                   |             | Glucose (mmol/l)                | 0.01 (-0.03; 0.04)   | 7.4×10 <sup>-1</sup>  | 0.502     | 2            | IVW      |             |
|                   |             | Glycated haemoglobin (mmol/mol) | 0.89 (0.17; 1.61)    | 1.6×10 <sup>-2</sup>  | None      | 2            | MR Egger |             |
|                   |             | T2DM (OR)                       | 1.00 (0.92; 1.09)    | 9.2×10 <sup>-1</sup>  | None      | 1            | Wald     |             |
|                   |             | BMI (SD)                        | 0.01 (-0.02; 0.03)   | 6.6×10 <sup>-1</sup>  | None      | 1            | Wald     |             |
|                   |             | SBP (mmHg)                      | -0.55 (-0.95; -0.15) | 7.4×10 <sup>-3</sup>  | None      | 1            | Wald     |             |
|                   |             | DBP (mmHg)                      | -0.27 (-0.50; -0.04) | 2.1×10 <sup>-2</sup>  | None      | 1            | Wald     |             |
|                   |             | ECG heart rate (exercise) (BPM) | 0.14 (-0.73; 1.01)   | 7.5×10 <sup>-1</sup>  | 0.731     | 2            | IVW      |             |
|                   |             | ECG load (exercise) (Watts)     | 0.91 (-0.06; 1.89)   | 6.7×10 <sup>-2</sup>  | 0.739     | 2            | IVW      |             |
|                   |             | Asthma (OR)                     | 1.08 (0.99; 1.18)    | 9.1×10 <sup>-2</sup>  | 0.155     | 2            | IVW      |             |
|                   |             | CRP (log(mg/L))                 | 0.03 (-0.01; 0.08)   | 1.4×10 <sup>-1</sup>  | 0.859     | 2            | IVW      |             |
|                   |             | eGFR (SD of log(eGFR))          | 0.00 (-0.00; 0.01)   | 1.1×10 <sup>-1</sup>  | 0.259     | 2            | IVW      |             |
|                   |             | BUN (mg/dl)                     | -0.01 (-0.02; 0.00)  | 9.6×10 <sup>-2</sup>  | None      | 1            | Wald     |             |
|                   |             | CKD (OR)                        | 0.94 (0.81; 1.08)    | 3.6×10 <sup>-1</sup>  | 0.138     | 2            | IVW      |             |
|                   |             | Alzheimer's (OR)                | 1.00 (0.98; 1.02)    | 7.7×10 <sup>-1</sup>  | 0.481     | 2            | IVW      |             |
|                   |             | Parkinson's (OR)                | 1.01 (0.80; 1.27)    | 9.5×10 <sup>-1</sup>  | None      | 1            | Wald     |             |
|                   |             | Lewy body dementia (OR)         | 1.16 (0.71; 1.90)    | 5.6×10 <sup>-1</sup>  | None      | 1            | Wald     |             |
|                   |             | Breast cancer (OR)              | 0.94 (0.84; 1.05)    | 2.6×10 <sup>-1</sup>  | 0.788     | 2            | IVW      |             |
|                   |             | Lung cancer (OR)                | 0.97 (0.73; 1.29)    | 8.2×10 <sup>-1</sup>  | 0.609     | 2            | IVW      |             |
|                   |             | Colon cancer (OR)               | 0.87 (0.68; 1.10)    | 2.4×10 <sup>-1</sup>  | 0.965     | 2            | IVW      |             |
|                   |             | Prostate cancer (OR)            | 0.94 (0.82; 1.09)    | 4.5×10 <sup>-1</sup>  | 0.903     | 2            | IVW      |             |

**Table S16:** Phenome-wide drug target MR scan of proteins with a prioritized CMR association. (*continued*)

| Protein (uniprot)               | Protein set          | Trait                           | Estimate (95%CI)     | P-value                  | Q p-value           | No. Variants         | MR model | PQTl source |   |     |          |
|---------------------------------|----------------------|---------------------------------|----------------------|--------------------------|---------------------|----------------------|----------|-------------|---|-----|----------|
| LYAM2 (P16581)                  | Nearest              | HF (OR)                         | 1.02 (0.92; 1.14)    | 6.7×10 <sup>-1</sup>     | 0.478               | 8                    | IVW      | Scallop     |   |     |          |
|                                 |                      | Non-ischemic CM (OR)            | 5.73 (1.22; 26.88)   | 2.7×10 <sup>-2</sup>     | 0.962               | 8                    | MR Egger |             |   |     |          |
|                                 |                      | DCM (OR)                        | 0.51 (0.23; 1.12)    | 9.4×10 <sup>-2</sup>     | 0.115               | 7                    | IVW      |             |   |     |          |
|                                 |                      | AF (OR)                         | 1.27 (1.14; 1.41)    | 1.1×10 <sup>-5</sup>     | 0.480               | 7                    | IVW      |             |   |     |          |
|                                 |                      | CHD (OR)                        | 0.94 (0.70; 1.25)    | 6.7×10 <sup>-1</sup>     | 0.617               | 9                    | MR Egger |             |   |     |          |
|                                 |                      | clMT (mm)                       | -0.01 (-0.02; -0.00) | 4.4×10 <sup>-2</sup>     | 0.327               | 8                    | IVW      |             |   |     |          |
|                                 |                      | Carotid plaque (OR)             | 1.05 (0.43; 2.55)    | 9.1×10 <sup>-1</sup>     | 0.251               | 8                    | MR Egger |             |   |     |          |
|                                 |                      | Any stroke (OR)                 | 1.21 (0.65; 2.23)    | 5.5×10 <sup>-1</sup>     | 0.080               | 8                    | MR Egger |             |   |     |          |
|                                 |                      | Any ischemic stroke (OR)        | 1.16 (0.98; 1.37)    | 8.0×10 <sup>-2</sup>     | 0.112               | 8                    | IVW      |             |   |     |          |
|                                 |                      | LDL cholesterol (mmol/l)        | 0.03 (-0.07; 0.12)   | 5.6×10 <sup>-1</sup>     | 0.295               | 8                    | MR Egger |             |   |     |          |
|                                 |                      | Apolipoprotein B (g/l)          | 0.00 (-0.02; 0.03)   | 7.6×10 <sup>-1</sup>     | 0.365               | 8                    | MR Egger |             |   |     |          |
|                                 |                      | Triglycerides (mmol/l)          | 0.10 (-0.01; 0.20)   | 7.5×10 <sup>-2</sup>     | 0.381               | 8                    | MR Egger |             |   |     |          |
|                                 |                      | Cholesterol (mmol/l)            | 0.03 (-0.01; 0.07)   | 1.5×10 <sup>-1</sup>     | 0.295               | 7                    | IVW      |             |   |     |          |
|                                 |                      | HDL cholesterol (mmol/l)        | -0.01 (-0.06; 0.04)  | 7.6×10 <sup>-1</sup>     | 0.120               | 8                    | MR Egger |             |   |     |          |
|                                 |                      | Apolipoprotein A1 (g/l)         | 0.00 (-0.03; 0.03)   | 9.2×10 <sup>-1</sup>     | 0.266               | 8                    | MR Egger |             |   |     |          |
|                                 |                      | Glucose (mmol/l)                | 0.01 (-0.02; 0.04)   | 4.8×10 <sup>-1</sup>     | 0.371               | 8                    | IVW      |             |   |     |          |
|                                 |                      | Glycated haemoglobin (mmol/mol) | -0.21 (-0.37; -0.06) | 6.9×10 <sup>-3</sup>     | 0.456               | 8                    | IVW      |             |   |     |          |
|                                 |                      | T2DM (OR)                       | 1.04 (0.99; 1.09)    | 1.6×10 <sup>-1</sup>     | 0.700               | 9                    | IVW      |             |   |     |          |
|                                 |                      | BMI (SD)                        | 0.01 (-0.00; 0.03)   | 1.1×10 <sup>-1</sup>     | 0.384               | 9                    | IVW      |             |   |     |          |
|                                 |                      | SBP (mmHg)                      | 1.13 (-0.59; 2.86)   | 2.0×10 <sup>-1</sup>     | 0.201               | 8                    | MR Egger |             |   |     |          |
|                                 |                      | DBP (mmHg)                      | 0.94 (0.05; 1.84)    | 3.9×10 <sup>-2</sup>     | 0.319               | 8                    | MR Egger |             |   |     |          |
|                                 |                      | ECG heart rate (exercise) (BPM) | -1.70 (-5.38; 1.98)  | 3.6×10 <sup>-1</sup>     | 0.625               | 8                    | MR Egger |             |   |     |          |
|                                 |                      | ECG load (exercise) (Watts)     | -1.53 (-2.52; -0.54) | 2.5×10 <sup>-3</sup>     | 0.912               | 8                    | IVW      |             |   |     |          |
|                                 |                      | Asthma (OR)                     | 1.05 (0.98; 1.12)    | 1.7×10 <sup>-1</sup>     | 0.318               | 8                    | IVW      |             |   |     |          |
|                                 |                      | CRP (log(mg/L))                 | 0.05 (-0.01; 0.11)   | 1.2×10 <sup>-1</sup>     | 0.349               | 6                    | IVW      |             |   |     |          |
|                                 |                      | eGFR (SD of log(eGFR))          | 0.00 (-0.00; 0.01)   | 1.0×10 <sup>-1</sup>     | 0.784               | 8                    | IVW      |             |   |     |          |
|                                 |                      | BUN (mg/dl)                     | 0.01 (-0.05; 0.07)   | 8.1×10 <sup>-1</sup>     | 0.097               | 8                    | MR Egger |             |   |     |          |
|                                 |                      | CKD (OR)                        | 0.99 (0.88; 1.12)    | 8.9×10 <sup>-1</sup>     | 0.720               | 8                    | IVW      |             |   |     |          |
|                                 |                      | Alzheimer's (OR)                | 0.97 (0.94; 1.00)    | 5.6×10 <sup>-2</sup>     | 0.873               | 9                    | IVW      |             |   |     |          |
|                                 |                      | Parkinson's (OR)                | 0.97 (0.83; 1.13)    | 6.9×10 <sup>-1</sup>     | 0.263               | 9                    | IVW      |             |   |     |          |
|                                 |                      | Lewy body dementia (OR)         | 2.01 (1.04; 3.89)    | 3.7×10 <sup>-2</sup>     | 0.496               | 6                    | IVW      |             |   |     |          |
|                                 |                      | Breast cancer (OR)              | 1.16 (0.99; 1.37)    | 7.4×10 <sup>-2</sup>     | 0.611               | 8                    | IVW      |             |   |     |          |
|                                 |                      | Lung cancer (OR)                | 2.34 (0.45; 12.11)   | 3.1×10 <sup>-1</sup>     | 0.875               | 9                    | MR Egger |             |   |     |          |
|                                 |                      | Colon cancer (OR)               | 1.36 (0.35; 5.25)    | 6.6×10 <sup>-1</sup>     | 0.459               | 9                    | MR Egger |             |   |     |          |
|                                 |                      | Prostate cancer (OR)            | 0.72 (0.53; 0.97)    | 3.1×10 <sup>-2</sup>     | 0.064               | 7                    | IVW      |             |   |     |          |
|                                 |                      | MET (P08581)                    | Nearest              | HF (OR)                  | 1.05 (0.96; 1.16)   | 2.7×10 <sup>-1</sup> | 0.266    |             | 5 | IVW | Interval |
|                                 |                      |                                 |                      | Non-ischemic CM (OR)     | 0.92 (0.73; 1.16)   | 4.9×10 <sup>-1</sup> | 0.621    |             | 6 | IVW |          |
|                                 |                      |                                 |                      | DCM (OR)                 | 1.01 (0.73; 1.39)   | 9.6×10 <sup>-1</sup> | 0.720    |             | 6 | IVW |          |
|                                 |                      |                                 |                      | AF (OR)                  | 0.96 (0.91; 1.02)   | 1.7×10 <sup>-1</sup> | 0.290    |             | 6 | IVW |          |
|                                 |                      |                                 |                      | CHD (OR)                 | 0.97 (0.91; 1.04)   | 3.6×10 <sup>-1</sup> | 0.509    |             | 6 | IVW |          |
|                                 |                      |                                 |                      | clMT (mm)                | -0.00 (-0.01; 0.00) | 3.0×10 <sup>-1</sup> | 0.403    |             | 6 | IVW |          |
|                                 |                      |                                 |                      | Carotid plaque (OR)      | 0.98 (0.82; 1.17)   | 7.9×10 <sup>-1</sup> | 0.130    |             | 6 | IVW |          |
|                                 |                      |                                 |                      | Any stroke (OR)          | 1.14 (1.06; 1.23)   | 7.7×10 <sup>-4</sup> | 0.684    |             | 6 | IVW |          |
|                                 |                      |                                 |                      | Any ischemic stroke (OR) | 1.11 (1.02; 1.20)   | 1.3×10 <sup>-2</sup> | 0.845    |             | 6 | IVW |          |
|                                 |                      |                                 |                      | LDL cholesterol (mmol/l) | 0.02 (-0.00; 0.04)  | 5.7×10 <sup>-2</sup> | 0.670    |             | 6 | IVW |          |
|                                 |                      |                                 |                      | Apolipoprotein B (g/l)   | 0.00 (-0.00; 0.01)  | 8.8×10 <sup>-2</sup> | 0.422    |             | 6 | IVW |          |
|                                 |                      |                                 |                      | Triglycerides (mmol/l)   | 0.01 (-0.01; 0.04)  | 3.4×10 <sup>-1</sup> | 0.016    |             | 4 | IVW |          |
| Cholesterol (mmol/l)            | 0.03 (0.01; 0.06)    |                                 |                      | 1.4×10 <sup>-2</sup>     | 0.856               | 6                    | IVW      |             |   |     |          |
| HDL cholesterol (mmol/l)        | 0.01 (-0.00; 0.02)   |                                 |                      | 8.6×10 <sup>-2</sup>     | 0.127               | 6                    | IVW      |             |   |     |          |
| Apolipoprotein A1 (g/l)         | 0.01 (0.01; 0.02)    |                                 |                      | 3.3×10 <sup>-5</sup>     | 0.418               | 6                    | IVW      |             |   |     |          |
| Glucose (mmol/l)                | 0.01 (-0.03; 0.04)   |                                 |                      | 7.1×10 <sup>-1</sup>     | 0.340               | 6                    | IVW      |             |   |     |          |
| Glycated haemoglobin (mmol/mol) | -0.01 (-0.17; 0.16)  |                                 |                      | 9.2×10 <sup>-1</sup>     | 0.321               | 6                    | IVW      |             |   |     |          |
| T2DM (OR)                       | 0.95 (0.90; 1.01)    |                                 |                      | 7.8×10 <sup>-2</sup>     | 0.187               | 6                    | IVW      |             |   |     |          |
| BMI (SD)                        | -0.00 (-0.01; 0.01)  |                                 |                      | 8.2×10 <sup>-1</sup>     | 0.012               | 6                    | IVW      |             |   |     |          |
| SBP (mmHg)                      | 0.55 (0.04; 1.07)    |                                 |                      | 3.3×10 <sup>-2</sup>     | 0.077               | 4                    | IVW      |             |   |     |          |
| DBP (mmHg)                      | -0.30 (-0.72; 0.13)  |                                 |                      | 1.7×10 <sup>-1</sup>     | 0.702               | 7                    | MR Egger |             |   |     |          |
| ECG heart rate (exercise) (BPM) | -0.09 (-0.94; 0.77)  |                                 |                      | 8.4×10 <sup>-1</sup>     | 0.527               | 6                    | IVW      |             |   |     |          |
| ECG load (exercise) (Watts)     | -0.42 (-1.38; 0.54)  |                                 |                      | 3.9×10 <sup>-1</sup>     | 0.665               | 6                    | IVW      |             |   |     |          |
| Asthma (OR)                     | 0.99 (0.94; 1.05)    |                                 |                      | 8.6×10 <sup>-1</sup>     | 0.717               | 6                    | IVW      |             |   |     |          |
| CRP (log(mg/L))                 | -0.05 (-0.08; -0.01) |                                 |                      | 9.5×10 <sup>-3</sup>     | 0.638               | 6                    | IVW      |             |   |     |          |
| eGFR (SD of log(eGFR))          | -0.00 (-0.01; 0.00)  |                                 |                      | 5.2×10 <sup>-1</sup>     | 0.333               | 5                    | IVW      |             |   |     |          |
| BUN (mg/dl)                     | 0.01 (-0.00; 0.01)   |                                 |                      | 1.4×10 <sup>-1</sup>     | 0.681               | 6                    | IVW      |             |   |     |          |
| CKD (OR)                        | 1.01 (0.93; 1.09)    |                                 |                      | 8.2×10 <sup>-1</sup>     | 0.817               | 6                    | IVW      |             |   |     |          |
| Alzheimer's (OR)                | 1.01 (0.99; 1.03)    |                                 |                      | 1.8×10 <sup>-1</sup>     | 0.284               | 6                    | IVW      |             |   |     |          |
| Parkinson's (OR)                | 1.26 (0.77; 2.05)    |                                 |                      | 3.5×10 <sup>-1</sup>     | 0.012               | 7                    | MR Egger |             |   |     |          |
| Lewy body dementia (OR)         | 1.23 (0.78; 1.95)    |                                 |                      | 3.7×10 <sup>-1</sup>     | 0.163               | 5                    | IVW      |             |   |     |          |

**Table S16:** Phenome-wide drug target MR scan of proteins with a prioritized CMR association. (*continued*)

| Protein (uniprot)    | Protein set       | Trait                           | Estimate (95%CI)     | P-value              | Q p-value | No. Variants | MR model | PQTl source |
|----------------------|-------------------|---------------------------------|----------------------|----------------------|-----------|--------------|----------|-------------|
|                      |                   | Breast cancer (OR)              | 1.48 (1.15; 1.92)    | $2.8 \times 10^{-3}$ | 0.960     | 7            | MR Egger |             |
|                      |                   | Lung cancer (OR)                | 1.08 (0.87; 1.34)    | $4.7 \times 10^{-1}$ | 0.415     | 6            | IVW      |             |
|                      |                   | Colon cancer (OR)               | 1.03 (0.87; 1.22)    | $7.2 \times 10^{-1}$ | 0.954     | 6            | IVW      |             |
|                      |                   | Prostate cancer (OR)            | 0.92 (0.83; 1.02)    | $9.7 \times 10^{-2}$ | 0.529     | 6            | IVW      |             |
| PA11 (P05121)        | Nearest           | HF (OR)                         | 1.04 (0.90; 1.20)    | $6.3 \times 10^{-1}$ | None      | 1            | Wald     | Framingham  |
|                      |                   | Non-ischemic CM (OR)            | 1.11 (0.60; 2.06)    | $7.4 \times 10^{-1}$ | None      | 1            | Wald     |             |
|                      |                   | DCM (OR)                        | 0.43 (0.21; 0.89)    | $2.3 \times 10^{-2}$ | None      | 1            | Wald     |             |
|                      |                   | AF (OR)                         | 1.23 (1.09; 1.39)    | $1.1 \times 10^{-3}$ | None      | 1            | Wald     |             |
|                      |                   | CHD (OR)                        | 1.11 (0.96; 1.30)    | $1.6 \times 10^{-1}$ | None      | 1            | Wald     |             |
|                      |                   | clMT (mm)                       | -0.01 (-0.02; 0.01)  | $2.1 \times 10^{-1}$ | None      | 1            | Wald     |             |
|                      |                   | Carotid plaque (OR)             | 1.00 (0.71; 1.40)    | $9.9 \times 10^{-1}$ | None      | 1            | Wald     |             |
|                      |                   | Any stroke (OR)                 | 0.97 (0.81; 1.15)    | $7.1 \times 10^{-1}$ | None      | 1            | Wald     |             |
|                      |                   | Any ischemic stroke (OR)        | 0.98 (0.82; 1.19)    | $8.6 \times 10^{-1}$ | None      | 1            | Wald     |             |
|                      |                   | LDL cholesterol (mmol/l)        | -0.00 (-0.04; 0.04)  | $9.8 \times 10^{-1}$ | None      | 1            | Wald     |             |
|                      |                   | Apolipoprotein B (g/l)          | -0.00 (-0.01; 0.01)  | $6.8 \times 10^{-1}$ | None      | 1            | Wald     |             |
|                      |                   | Triglycerides (mmol/l)          | -0.05 (-0.09; -0.00) | $3.9 \times 10^{-2}$ | None      | 1            | Wald     |             |
|                      |                   | Cholesterol (mmol/l)            | 0.01 (-0.04; 0.06)   | $6.2 \times 10^{-1}$ | None      | 1            | Wald     |             |
|                      |                   | HDL cholesterol (mmol/l)        | 0.02 (0.01; 0.04)    | $8.7 \times 10^{-3}$ | None      | 1            | Wald     |             |
|                      |                   | Apolipoprotein A1 (g/l)         | 0.01 (0.00; 0.03)    | $1.4 \times 10^{-2}$ | None      | 1            | Wald     |             |
|                      |                   | Glucose (mmol/l)                | 0.05 (-0.01; 0.10)   | $1.1 \times 10^{-1}$ | None      | 1            | Wald     |             |
|                      |                   | Glycated haemoglobin (mmol/mol) | 0.10 (-0.18; 0.39)   | $4.7 \times 10^{-1}$ | None      | 1            | Wald     |             |
|                      |                   | T2DM (OR)                       | 1.04 (0.92; 1.17)    | $5.3 \times 10^{-1}$ | None      | 1            | Wald     |             |
|                      |                   | BMI (SD)                        | -0.04 (-0.07; -0.01) | $1.3 \times 10^{-2}$ | None      | 1            | Wald     |             |
|                      |                   | SBP (mmHg)                      | 0.51 (-0.05; 1.07)   | $7.2 \times 10^{-2}$ | None      | 1            | Wald     |             |
|                      |                   | DBP (mmHg)                      | -0.24 (-0.56; 0.07)  | $1.3 \times 10^{-1}$ | None      | 1            | Wald     |             |
|                      |                   | ECG heart rate (exercise) (BPM) | -1.35 (-2.96; 0.25)  | $9.9 \times 10^{-2}$ | None      | 1            | Wald     |             |
|                      |                   | ECG load (exercise) (Watts)     | 1.01 (-0.79; 2.81)   | $2.7 \times 10^{-1}$ | None      | 1            | Wald     |             |
|                      |                   | Asthma (OR)                     | 0.96 (0.85; 1.07)    | $4.2 \times 10^{-1}$ | None      | 1            | Wald     |             |
|                      |                   | CRP (log(mg/L))                 | -0.09 (-0.16; -0.01) | $2.4 \times 10^{-2}$ | None      | 1            | Wald     |             |
|                      |                   | eGFR (SD of log(eGFR))          | 0.00 (-0.01; 0.01)   | $7.6 \times 10^{-1}$ | None      | 1            | Wald     |             |
|                      |                   | BUN (mg/dl)                     | 0.01 (-0.01; 0.03)   | $2.2 \times 10^{-1}$ | None      | 1            | Wald     |             |
|                      |                   | CKD (OR)                        | 1.11 (0.94; 1.32)    | $2.1 \times 10^{-1}$ | None      | 1            | Wald     |             |
|                      |                   | Alzheimer's (OR)                | 1.04 (1.00; 1.08)    | $3.9 \times 10^{-2}$ | None      | 1            | Wald     |             |
|                      |                   | Parkinson's (OR)                | 1.18 (0.83; 1.67)    | $3.6 \times 10^{-1}$ | None      | 1            | Wald     |             |
|                      |                   | Lewy body dementia (OR)         | 1.17 (0.59; 2.33)    | $6.5 \times 10^{-1}$ | None      | 1            | Wald     |             |
|                      |                   | Breast cancer (OR)              | 1.03 (0.83; 1.26)    | $8.1 \times 10^{-1}$ | None      | 1            | Wald     |             |
|                      |                   | Lung cancer (OR)                | 0.98 (0.57; 1.66)    | $9.3 \times 10^{-1}$ | None      | 1            | Wald     |             |
|                      |                   | Colon cancer (OR)               | 1.02 (0.67; 1.57)    | $9.2 \times 10^{-1}$ | None      | 1            | Wald     |             |
| Prostate cancer (OR) | 1.05 (0.80; 1.37) | $7.4 \times 10^{-1}$            | None                 | 1                    | Wald      |              |          |             |
| SYUA (P37840)        | Nearest           | HF (OR)                         | 1.27 (0.88; 1.83)    | $2.0 \times 10^{-1}$ | 0.061     | 4            | MR Egger | Interval    |
|                      |                   | Non-ischemic CM (OR)            | 1.42 (1.05; 1.94)    | $2.4 \times 10^{-2}$ | 0.811     | 4            | IVW      |             |
|                      |                   | DCM (OR)                        | 2.35 (0.60; 9.13)    | $2.2 \times 10^{-1}$ | 0.242     | 4            | MR Egger |             |
|                      |                   | AF (OR)                         | 1.00 (0.94; 1.07)    | $9.1 \times 10^{-1}$ | 0.400     | 4            | IVW      |             |
|                      |                   | CHD (OR)                        | 1.19 (0.91; 1.55)    | $2.0 \times 10^{-1}$ | 0.281     | 4            | MR Egger |             |
|                      |                   | clMT (mm)                       | 0.00 (-0.00; 0.01)   | $3.1 \times 10^{-1}$ | 0.320     | 4            | IVW      |             |
|                      |                   | Carotid plaque (OR)             | 1.09 (0.93; 1.27)    | $2.8 \times 10^{-1}$ | 0.797     | 4            | IVW      |             |
|                      |                   | Any stroke (OR)                 | 1.08 (0.99; 1.18)    | $7.3 \times 10^{-2}$ | 0.732     | 4            | IVW      |             |
|                      |                   | Any ischemic stroke (OR)        | 1.12 (1.02; 1.23)    | $2.1 \times 10^{-2}$ | 0.382     | 4            | IVW      |             |
|                      |                   | LDL cholesterol (mmol/l)        | -0.00 (-0.02; 0.01)  | $8.4 \times 10^{-1}$ | 0.943     | 5            | IVW      |             |
|                      |                   | Apolipoprotein B (g/l)          | -0.00 (-0.01; 0.00)  | $3.6 \times 10^{-1}$ | 0.889     | 5            | IVW      |             |
|                      |                   | Triglycerides (mmol/l)          | -0.01 (-0.03; 0.01)  | $1.8 \times 10^{-1}$ | 0.778     | 5            | IVW      |             |
|                      |                   | Cholesterol (mmol/l)            | 0.00 (-0.02; 0.02)   | $6.6 \times 10^{-1}$ | 0.581     | 5            | IVW      |             |
|                      |                   | HDL cholesterol (mmol/l)        | -0.00 (-0.01; 0.01)  | $9.5 \times 10^{-1}$ | 0.011     | 5            | MR Egger |             |
|                      |                   | Apolipoprotein A1 (g/l)         | -0.01 (-0.01; 0.00)  | $9.9 \times 10^{-2}$ | 0.006     | 5            | MR Egger |             |
|                      |                   | Glucose (mmol/l)                | -0.00 (-0.03; 0.02)  | $6.9 \times 10^{-1}$ | 0.763     | 5            | IVW      |             |
|                      |                   | Glycated haemoglobin (mmol/mol) | -0.25 (-0.40; -0.10) | $1.2 \times 10^{-3}$ | 0.129     | 5            | IVW      |             |
|                      |                   | T2DM (OR)                       | 1.07 (0.82; 1.38)    | $6.2 \times 10^{-1}$ | 0.106     | 4            | MR Egger |             |
|                      |                   | BMI (SD)                        | -0.00 (-0.06; 0.05)  | $8.7 \times 10^{-1}$ | 0.251     | 4            | MR Egger |             |
|                      |                   | SBP (mmHg)                      | -0.13 (-0.41; 0.15)  | $3.7 \times 10^{-1}$ | 0.696     | 4            | IVW      |             |
|                      |                   | DBP (mmHg)                      | -0.02 (-0.18; 0.14)  | $7.9 \times 10^{-1}$ | 0.910     | 4            | IVW      |             |
|                      |                   | ECG heart rate (exercise) (BPM) | -0.66 (-1.65; 0.33)  | $1.9 \times 10^{-1}$ | 0.021     | 5            | MR Egger |             |
|                      |                   | ECG load (exercise) (Watts)     | -0.15 (-1.54; 1.24)  | $8.3 \times 10^{-1}$ | 0.194     | 5            | MR Egger |             |
|                      |                   | Asthma (OR)                     | 1.03 (0.98; 1.07)    | $2.1 \times 10^{-1}$ | 0.953     | 5            | IVW      |             |
|                      |                   | CRP (log(mg/L))                 | 0.01 (-0.03; 0.05)   | $7.1 \times 10^{-1}$ | 0.796     | 4            | IVW      |             |
|                      |                   | eGFR (SD of log(eGFR))          | 0.01 (-0.00; 0.02)   | $5.2 \times 10^{-2}$ | 0.422     | 4            | MR Egger |             |
|                      |                   | BUN (mg/dl)                     | -0.01 (-0.01; 0.00)  | $1.6 \times 10^{-1}$ | 0.377     | 4            | IVW      |             |



**Table S16:** Phenome-wide drug target MR scan of proteins with a prioritized CMR association. (*continued*)

| Protein (uniprot) | Protein set | Trait                   | Estimate (95%CI)  | P-value               | Q p-value | No. variants | MR model | PQTL source |
|-------------------|-------------|-------------------------|-------------------|-----------------------|-----------|--------------|----------|-------------|
|                   |             | CKD (OR)                | 0.97 (0.89; 1.06) | $4.8 \times 10^{-1}$  | 0.562     | 4            | IVW      |             |
|                   |             | Alzheimer's (OR)        | 0.97 (0.92; 1.03) | $3.6 \times 10^{-1}$  | 0.043     | 4            | MR Egger |             |
|                   |             | Parkinson's (OR)        | 0.36 (0.28; 0.47) | $7.3 \times 10^{-15}$ | 0.494     | 2            | IVW      |             |
|                   |             | Lewy body dementia (OR) | 0.34 (0.20; 0.58) | $6.2 \times 10^{-5}$  | 0.683     | 2            | IVW      |             |
|                   |             | Breast cancer (OR)      | 0.91 (0.81; 1.01) | $8.6 \times 10^{-2}$  | 0.618     | 4            | IVW      |             |
|                   |             | Lung cancer (OR)        | 0.46 (0.16; 1.34) | $1.5 \times 10^{-1}$  | 0.045     | 4            | MR Egger |             |
|                   |             | Colon cancer (OR)       | 1.00 (0.80; 1.26) | $9.7 \times 10^{-1}$  | 0.449     | 4            | IVW      |             |
|                   |             | Prostate cancer (OR)    | 0.91 (0.78; 1.04) | $1.7 \times 10^{-1}$  | 0.574     | 4            | IVW      |             |

*General:*  
 CMR: Cardiac MRI, MR: Mendelian randomization, MD: mean difference, CI: confidence interval. Effect estimates are presented per protein standard deviation increase.

**Table S17:** Comparing the Schmidt et al. discovered CMR genes to three recent CMR GWAS publications.

| Index gene                 | Nearest gene (Schmidt et al.)                                                                                                                                                                    | Potential causal gene (Schmidt et al.)                                                                                                                                            | Pirruccello et al. 2020                                                      | Pirruccello et al. 2022                                                                                                                                  | Aung et al.                                        | CMR Trait                                                                      |
|----------------------------|--------------------------------------------------------------------------------------------------------------------------------------------------------------------------------------------------|-----------------------------------------------------------------------------------------------------------------------------------------------------------------------------------|------------------------------------------------------------------------------|----------------------------------------------------------------------------------------------------------------------------------------------------------|----------------------------------------------------|--------------------------------------------------------------------------------|
| ALDH2 (ENSG00000111275)    | MAPKAPK5-AS1 (ENSG00000234608)                                                                                                                                                                   | ALDH2 (ENSG00000111275)                                                                                                                                                           |                                                                              |                                                                                                                                                          |                                                    | RV - PER                                                                       |
| ALPK3 (ENSG00000136383)    | SNORA25 (ENSG00000200991)<br>SNORA25 (ENSG00000200991)<br>ALPK3 (ENSG00000136383)                                                                                                                | ALPK3 (ENSG00000136383)<br>ALPK3 (ENSG00000136383)<br>ALPK3 (ENSG00000136383)                                                                                                     |                                                                              | ALPK3 (ENSG00000136383)<br>ALPK3 (ENSG00000136383)<br>ALPK3 (ENSG00000136383)<br>ALPK3 (ENSG00000136383)                                                 |                                                    | LV - ESV<br>LV - EF<br>LV - MVR<br>LV - EDV                                    |
| ATXN2 (ENSG00000204842)    | U7 (ENSG00000272215)<br>U7 (ENSG00000272215)<br>U7 (ENSG00000272215)<br>ATXN2 (ENSG00000204842)<br>ATXN2 (ENSG00000204842)                                                                       | ATXN2 (ENSG00000204842)<br>ATXN2 (ENSG00000204842)<br>ATXN2 (ENSG00000204842)<br>ATXN2 (ENSG00000204842)<br>ATXN2 (ENSG00000204842)                                               | ATXN2 (ENSG00000204842)<br>ATXN2 (ENSG00000204842)                           | ATXN2 (ENSG00000204842)<br>ATXN2 (ENSG00000204842)<br>ATXN2 (ENSG00000204842)                                                                            | ATXN2 (ENSG00000204842)<br>ATXN2 (ENSG00000204842) | LV - ESV<br>LV - EDV<br>LV - SV<br>RV - ESV<br>RV - SV<br>RV - EDV             |
| BAG3 (ENSG00000151929)     | BAG3 (ENSG00000151929)<br>RGS10 (ENSG00000148908)<br>BAG3 (ENSG00000151929)<br>BAG3 (ENSG00000151929)<br>BAG3 (ENSG00000151929)<br>BAG3 (ENSG00000151929)                                        | BAG3 (ENSG00000151929)<br>BAG3 (ENSG00000151929)<br>BAG3 (ENSG00000151929)<br>BAG3 (ENSG00000151929)<br>BAG3 (ENSG00000151929)<br>BAG3 (ENSG00000151929)                          | BAG3 (ENSG00000151929)<br>BAG3 (ENSG00000151929)<br>BAG3 (ENSG00000151929)   | BAG3 (ENSG00000151929)<br>BAG3 (ENSG00000151929)<br>BAG3 (ENSG00000151929)<br>BAG3 (ENSG00000151929)                                                     | BAG3 (ENSG00000151929)<br>BAG3 (ENSG00000151929)   | RV - EDV<br>LV - EDV<br>RV - ESV<br>LV - ESV<br>LV - EF<br>RV - EF<br>RV - ESV |
| CCDC136 (ENSG00000128596)  |                                                                                                                                                                                                  |                                                                                                                                                                                   |                                                                              | FLNC (ENSG00000128591)<br>FLNC (ENSG00000128591)                                                                                                         |                                                    | LV - ESV<br>LV - EF<br>LV - ESV                                                |
| CDKN1A (ENSG00000124762)   | FLNC (ENSG00000128591)                                                                                                                                                                           | CCDC136 (ENSG00000128596)                                                                                                                                                         | FLNC (ENSG00000128591)<br>FLNC (ENSG00000128591)<br>CDKN1A (ENSG00000124762) | CDKN1A (ENSG00000124762)<br>CDKN1A (ENSG00000124762)                                                                                                     |                                                    | LV - MVR<br>LV - EF<br>LV - EDM                                                |
| CMSS1 (ENSG00000184220)    | CDKN1A (ENSG00000124762)<br>CDKN1A (ENSG00000124762)<br>RNU1-88P (ENSG00000238554)                                                                                                               | CDKN1A (ENSG00000124762)<br>CDKN1A (ENSG00000124762)<br>CDKN1A (ENSG00000124762)                                                                                                  | CDKN1A (ENSG00000124762)                                                     | CDKN1A (ENSG00000124762)                                                                                                                                 |                                                    | RV - SV<br>RV - ESV<br>RV - EDV                                                |
| CRK (ENSG00000167193)      | FILIP1L (ENSG00000168386)<br>FILIP1L (ENSG00000168386)<br>MYO1C (ENSG00000197879)<br>MYO1C (ENSG00000197879)                                                                                     | CMSS1 (ENSG00000184220)<br>MYO1C (ENSG00000167193)<br>CRK (ENSG00000167193)                                                                                                       | MYO1C (ENSG00000197879)<br>MYO1C (ENSG00000197879)                           | FILIP1L (ENSG00000168386)<br>FILIP1L (ENSG00000168386)<br>FILIP1L (ENSG00000168386)                                                                      |                                                    | LV - ESV<br>LV - EDV<br>LV - EDV                                               |
| CTSB (ENSG00000164733)     | OR7E161P (ENSG00000206014)<br>INHA (ENSG00000123999)<br>RSPH6A (ENSG00000104941)<br>RSPH6A (ENSG00000104941)<br>RSPH6A (ENSG00000104941)<br>RSPH6A (ENSG00000104941)<br>RSPH6A (ENSG00000104941) | CTSB (ENSG00000164733)<br>DES (ENSG00000175084)<br>DMPK (ENSG00000104936)<br>DMPK (ENSG00000104936)<br>DMPK (ENSG00000104936)<br>DMPK (ENSG00000104936)<br>DMPK (ENSG00000104936) |                                                                              | RSPH6A (ENSG00000104941)<br>DMPK (ENSG00000104936)<br>RSPH6A (ENSG00000104941)<br>RSPH6A (ENSG00000104941)                                               |                                                    | LV - EF<br>LV - MVR<br>RV - EDV<br>RV - ESV<br>RV - SV<br>LV - EDV<br>LV - ESV |
| FHOD3 (ENSG00000134775)    | RSPH6A (ENSG00000104941)                                                                                                                                                                         | DMPK (ENSG00000104936)                                                                                                                                                            | MYO1C (ENSG00000197879)                                                      | RSPH6A (ENSG00000104941)<br>RSPH6A (ENSG00000104941)                                                                                                     | RSPH6A (ENSG00000104941)                           | RV - EDV<br>RV - MVR<br>RV - PER<br>LV - SV<br>LV - EF                         |
| GOSR2 (ENSG00000108433)    | SNORD112 (ENSG00000252078)                                                                                                                                                                       | FHOD3 (ENSG00000134775)                                                                                                                                                           | MYO1C (ENSG00000197879)                                                      | RSPH6A (ENSG00000104941)<br>RSPH6A (ENSG00000104941)                                                                                                     |                                                    | RV - EDV<br>RV - MVR<br>RV - PER<br>LV - SV<br>LV - EF                         |
| HIST3H3 (ENSG00000168148)  | RP11-156P1.2 (ENSG00000262633)<br>RP11-156P1.2 (ENSG00000262633)                                                                                                                                 | GOSR2 (ENSG00000108433)<br>GOSR2 (ENSG00000108433)                                                                                                                                |                                                                              | RSPH6A (ENSG00000104941)<br>RSPH6A (ENSG00000104941)                                                                                                     |                                                    | RV - EDV<br>RV - MVR<br>RV - PER<br>LV - SV<br>LV - EF                         |
| HLA-B (ENSG00000234745)    | HIST3H3 (ENSG00000168148)                                                                                                                                                                        | HIST3H3 (ENSG00000168148)                                                                                                                                                         | HLA-B (ENSG00000234745)                                                      | HLA-B (ENSG00000234745)<br>HLA-B (ENSG00000234745)                                                                                                       |                                                    | RV - EDV<br>RV - MVR<br>RV - PER<br>LV - SV<br>LV - EF                         |
| HLA-DRB1 (ENSG00000196126) | HLA-B (ENSG00000234745)<br>HLA-B (ENSG00000234745)<br>HLA-B (ENSG00000234745)                                                                                                                    | HLA-B (ENSG00000234745)<br>HLA-B (ENSG00000234745)<br>HLA-B (ENSG00000234745)                                                                                                     | HLA-B (ENSG00000234745)                                                      | HLA-B (ENSG00000234745)                                                                                                                                  |                                                    | RV - EDV<br>RV - MVR<br>RV - PER<br>LV - SV<br>LV - EF                         |
| HMG2 (ENSG00000149948)     | XXbac-BPG254F23.6 (ENSG00000241287)                                                                                                                                                              | HLA-DRB1 (ENSG00000196126)                                                                                                                                                        |                                                                              | HLA-B (ENSG00000234745)                                                                                                                                  |                                                    | RV - EDV<br>RV - MVR<br>RV - PER<br>LV - SV<br>LV - EF                         |
| HSPB7 (ENSG00000173641)    | HMG2 (ENSG00000149948)<br>HSPB7 (ENSG00000173641)<br>HSPB7 (ENSG00000173641)<br>HSPB7 (ENSG00000173641)                                                                                          | HMG2 (ENSG00000149948)<br>HSPB7 (ENSG00000173641)<br>HSPB7 (ENSG00000173641)<br>HSPB7 (ENSG00000173641)                                                                           |                                                                              | HMG2 (ENSG00000149948)<br>HMG2 (ENSG00000149948)<br>HMG2 (ENSG00000149948)<br>HMG2 (ENSG00000149948)<br>HMG2 (ENSG00000149948)<br>HMG2 (ENSG00000149948) |                                                    | RV - EDV<br>RV - MVR<br>RV - PER<br>LV - SV<br>LV - EF<br>RV - EDV<br>RV - EF  |
| IGF1R (ENSG00000140443)    | MIR4714 (ENSG00000264480)<br>MIR4714 (ENSG00000264480)                                                                                                                                           | IGF1R (ENSG00000140443)<br>IGF1R (ENSG00000140443)                                                                                                                                |                                                                              | HSPB7 (ENSG00000173641)<br>HSPB7 (ENSG00000173641)                                                                                                       |                                                    | LV - EDV<br>LV - EDM<br>LV - MVR                                               |
| KANSL1 (ENSG00000120071)   | DND1P1 (ENSG00000264070)<br>ARL17B (ENSG00000228696)                                                                                                                                             | KANSL1 (ENSG00000120071)<br>KANSL1 (ENSG00000120071)                                                                                                                              |                                                                              | HSPB7 (ENSG00000173641)                                                                                                                                  |                                                    | LV - MVR<br>LV - MVR<br>LV - EDM                                               |
| KCNH2 (ENSG00000055118)    | NOS3 (ENSG00000164867)<br>NOS3 (ENSG00000164867)                                                                                                                                                 | KCNH2 (ENSG00000055118)<br>KCNH2 (ENSG00000055118)                                                                                                                                | NOS3 (ENSG00000164867)                                                       |                                                                                                                                                          |                                                    | LV - EDV<br>RV - EDV<br>RV - SV                                                |
| KCNK3 (ENSG00000171303)    | KCNK3 (ENSG00000171303)<br>KCNK3 (ENSG00000171303)                                                                                                                                               | KCNK3 (ENSG00000171303)<br>KCNK3 (ENSG00000171303)                                                                                                                                |                                                                              | KCNK3 (ENSG00000171303)                                                                                                                                  |                                                    | RV - EDV<br>RV - EDV<br>RV - SV                                                |
| LMF1 (ENSG00000103227)     |                                                                                                                                                                                                  |                                                                                                                                                                                   | LMF1 (ENSG00000103227)<br>LMF1 (ENSG00000103227)                             | LMF1 (ENSG00000103227)                                                                                                                                   |                                                    | RV - EDV<br>LV - EDV<br>LV - EF                                                |

**Table S17:** Comparing the Schmidt et al. discovered CMR genes to three recent CMR GWAS publications. (continued)

| Index gene                      | Nearest gene (Schmidt et al.)   | Putative causal gene (Schmidt et al.) | Pirruccello et al. 2020   | Pirruccello et al. 2022   | Aung et al.               | CMR trait                                                                                                                                           |
|---------------------------------|---------------------------------|---------------------------------------|---------------------------|---------------------------|---------------------------|-----------------------------------------------------------------------------------------------------------------------------------------------------|
| LRL1 (ENSG00000268955)          | LA16c-306A4.2 (ENSG00000260316) | LMF1 (ENSG00000103227)                |                           |                           |                           | LV - MVR                                                                                                                                            |
| MLF1 (ENSG00000178053)          | ALG1L13P (ENSG00000253981)      | LRL1 (ENSG00000268955)                | MLF1 (ENSG00000178053)    | MLF1 (ENSG00000178053)    |                           | RV - EF<br>LV - ESV<br>RV - EDV<br>RV - ESV<br>RV - EF<br>RV - EF<br>RV - MVR<br>LV - EF<br>LV - ESV<br>LV - MVR<br>RV - EDV<br>RV - ESV<br>RV - EF |
| MTMR9 (ENSG00000104643)         | RP11-113A11.1 (ENSG00000241723) | MLF1 (ENSG00000178053)                |                           |                           |                           | RV - MVR                                                                                                                                            |
| MYO18B (ENSG00000133454)        | MLF1 (ENSG00000178053)          | MLF1 (ENSG00000178053)                |                           | MLF1 (ENSG00000178053)    |                           | RV - EF                                                                                                                                             |
| NEDD4L (ENSG00000049759)        | MLF1 (ENSG00000178053)          | MLF1 (ENSG00000178053)                |                           | MLF1 (ENSG00000178053)    |                           | RV - EF                                                                                                                                             |
|                                 | AF131215.4 (ENSG00000254556)    | MTMR9 (ENSG00000104643)               |                           |                           |                           | RV - EF                                                                                                                                             |
|                                 | MYO18B (ENSG00000133454)        | MYO18B (ENSG00000133454)              |                           |                           |                           | RV - MVR                                                                                                                                            |
|                                 | RP11-845C23.2 (ENSG00000267504) | NEDD4L (ENSG00000049759)              | NEDD4L (ENSG00000049759)  |                           |                           | LV - EF                                                                                                                                             |
|                                 | RP11-718115.1 (ENSG00000267743) | NEDD4L (ENSG00000049759)              | NEDD4L (ENSG00000049759)  |                           |                           | LV - ESV                                                                                                                                            |
| NSF (ENSG00000073969)           | RP57P11 (ENSG00000213326)       | NSF (ENSG00000073969)                 |                           |                           |                           | LV - MVR                                                                                                                                            |
| OBSCN (ENSG00000154358)         |                                 |                                       |                           |                           | OBSCN (ENSG00000154358)   | RV - EDV                                                                                                                                            |
|                                 | OBSCN (ENSG00000154358)         | OBSCN (ENSG00000154358)               |                           | OBSCN (ENSG00000154358)   | OBSCN (ENSG00000154358)   | RV - ESV                                                                                                                                            |
|                                 | OBSCN (ENSG00000154358)         | OBSCN (ENSG00000154358)               |                           |                           | OBSCN (ENSG00000154358)   | RV - EF                                                                                                                                             |
| PDESA (ENSG00000138735)         | OBSCN (ENSG00000154358)         | OBSCN (ENSG00000154358)               |                           |                           |                           | LV - ESV                                                                                                                                            |
| PLEC (ENSG00000178209)          | PDESA (ENSG00000138735)         | PDESA (ENSG00000138735)               |                           |                           |                           | RV - EF                                                                                                                                             |
|                                 | MIR661 (ENSG00000207574)        | PLEC (ENSG00000178209)                |                           | PLEC (ENSG00000178209)    | PLEC (ENSG00000178209)    | RV - EF                                                                                                                                             |
|                                 | MIR661 (ENSG00000207574)        | PLEC (ENSG00000178209)                |                           | PLEC (ENSG00000178209)    |                           | RV - EF                                                                                                                                             |
|                                 | MIR661 (ENSG00000207574)        | PLEC (ENSG00000178209)                |                           |                           |                           | LV - EF                                                                                                                                             |
| PLN (ENSG00000198523)           |                                 |                                       | PLN (ENSG00000198523)     |                           |                           | LV - SV                                                                                                                                             |
|                                 |                                 |                                       |                           |                           | SLC35F1 (ENSG00000196376) | RV - SV                                                                                                                                             |
|                                 | SLC35F1 (ENSG00000196376)       | PLN (ENSG00000198523)                 | PLN (ENSG00000198523)     | SLC35F1 (ENSG00000196376) |                           | LV - ESV                                                                                                                                            |
| PPP1R1B (ENSG00000131771)       | SLC35F1 (ENSG00000196376)       | PLN (ENSG00000198523)                 | PLN (ENSG00000198523)     | SLC35F1 (ENSG00000196376) |                           | LV - MVR                                                                                                                                            |
| PROB1 (ENSG00000228672)         | STAR3 (ENSG00000131748)         | PPP1R1B (ENSG00000131771)             |                           |                           |                           | LV - EDV                                                                                                                                            |
|                                 | DNAJC18 (ENSG00000170464)       | PROB1 (ENSG00000228672)               |                           |                           | SLC23A1 (ENSG00000170482) | LV - EDM                                                                                                                                            |
|                                 | DNAJC18 (ENSG00000170464)       | PROB1 (ENSG00000228672)               |                           |                           | DNAJC18 (ENSG00000170464) | RV - EF                                                                                                                                             |
|                                 | DNAJC18 (ENSG00000170464)       | PROB1 (ENSG00000228672)               | PROB1 (ENSG00000228672)   | PROB1 (ENSG00000228672)   |                           | RV - ESV                                                                                                                                            |
|                                 | DNAJC18 (ENSG00000170464)       | PROB1 (ENSG00000228672)               | PROB1 (ENSG00000228672)   | PROB1 (ENSG00000228672)   |                           | LV - ESV                                                                                                                                            |
| PROM1 (ENSG0000007062)          | RNU6-350P (ENSG00000251758)     | PROM1 (ENSG0000007062)                | DNAJC18 (ENSG00000170464) | PROB1 (ENSG00000228672)   |                           | LV - EF                                                                                                                                             |
| PTPN11 (ENSG00000179295)        |                                 |                                       |                           |                           | PTPN11 (ENSG00000179295)  | LV - EF                                                                                                                                             |
|                                 | PTPN11 (ENSG00000179295)        | PTPN11 (ENSG00000179295)              |                           |                           | PTPN11 (ENSG00000179295)  | RV - ESV                                                                                                                                            |
|                                 | PTPN11 (ENSG00000179295)        | PTPN11 (ENSG00000179295)              |                           |                           | PTPN11 (ENSG00000179295)  | RV - SV                                                                                                                                             |
|                                 | PTPN11 (ENSG00000179295)        | PTPN11 (ENSG00000179295)              |                           |                           | PTPN11 (ENSG00000179295)  | RV - EDV                                                                                                                                            |
| RP11-457K10.1 (ENSG00000242029) | RP11-457K10.1 (ENSG00000242029) | RP11-457K10.1 (ENSG00000242029)       |                           |                           |                           | LV - SV                                                                                                                                             |
| SCN10A (ENSG00000185313)        | SCN10A (ENSG00000185313)        | SCN10A (ENSG00000185313)              |                           |                           |                           | RV - PAFR                                                                                                                                           |
| SIPAL1L (ENSG00000197555)       | RP1-261D10.1 (ENSG00000259079)  | SIPAL1L (ENSG00000197555)             |                           |                           |                           | LV - MVR                                                                                                                                            |
| SKI (ENSG00000157933)           |                                 |                                       | C1orf86 (ENSG00000162585) |                           |                           | LV - EF                                                                                                                                             |
|                                 | C1orf86 (ENSG00000162585)       | SKI (ENSG00000157933)                 |                           |                           |                           | LV - MVR                                                                                                                                            |
| SMARCB1 (ENSG00000099956)       | DERL3 (ENSG00000099958)         | SMARCB1 (ENSG00000099956)             | DERL3 (ENSG00000099958)   | SMARCB1 (ENSG00000099956) |                           | LV - MVR                                                                                                                                            |
|                                 | DERL3 (ENSG00000099958)         | SMARCB1 (ENSG00000099956)             | DERL3 (ENSG00000099958)   | SMARCB1 (ENSG00000099956) |                           | LV - ESV                                                                                                                                            |
|                                 | DERL3 (ENSG00000099958)         | SMARCB1 (ENSG00000099956)             | SMARCB1 (ENSG00000099956) | SMARCB1 (ENSG00000099956) |                           | LV - EF                                                                                                                                             |
| SPON1 (ENSG00000152268)         | SPON1 (ENSG00000152268)         | SPON1 (ENSG00000152268)               |                           |                           |                           | LV - ESV                                                                                                                                            |
|                                 | SPON1 (ENSG00000152268)         | SPON1 (ENSG00000152268)               |                           |                           |                           | RV - ESV                                                                                                                                            |
|                                 | SPON1 (ENSG00000152268)         | SPON1 (ENSG00000152268)               |                           |                           |                           | LV - EDM                                                                                                                                            |
| SYNP2L (ENSG00000166317)        | SYNP2L (ENSG00000166317)        | SYNP2L (ENSG00000166317)              |                           |                           |                           | LV - SV                                                                                                                                             |
| SYT10 (ENSG00000110975)         | SYT10 (ENSG00000110975)         | SYT10 (ENSG00000110975)               |                           |                           |                           | RV - EF                                                                                                                                             |
| TBX5 (ENSG00000089225)          | TBX5-AS1 (ENSG00000255399)      | TBX5 (ENSG00000089225)                |                           |                           |                           | RV - ESV                                                                                                                                            |
| TGFBR3 (ENSG00000069702)        | RN75L653P (ENSG00000239794)     | TGFBR3 (ENSG00000069702)              |                           |                           |                           | RV - ESV                                                                                                                                            |
| TGM2 (ENSG00000198959)          | KIAA1755 (ENSG00000149633)      | TGM2 (ENSG00000198959)                |                           |                           |                           | RV - SV                                                                                                                                             |
| TMEM43 (ENSG00000170876)        | RP11-536I6.2 (ENSG00000255021)  | TMEM43 (ENSG00000170876)              |                           |                           |                           | RV - EF                                                                                                                                             |
|                                 | RNASEP124 (ENSG00000199609)     | TMEM43 (ENSG00000170876)              |                           |                           |                           | RV - EF                                                                                                                                             |
|                                 | RP11-536I6.2 (ENSG00000255021)  | TMEM43 (ENSG00000170876)              |                           |                           |                           | RV - ESV                                                                                                                                            |
|                                 | RP11-536I6.2 (ENSG00000255021)  | TMEM43 (ENSG00000170876)              |                           |                           |                           | LV - ESV                                                                                                                                            |
|                                 | RP11-536I6.2 (ENSG00000255021)  | TMEM43 (ENSG00000170876)              |                           |                           |                           | LV - EF                                                                                                                                             |
| TNKS (ENSG00000173273)          |                                 |                                       |                           |                           | TNKS (ENSG00000173273)    | RV - ESV                                                                                                                                            |
|                                 | MIRS97 (ENSG00000207701)        | TNKS (ENSG00000173273)                |                           |                           |                           | LV - EF                                                                                                                                             |
| TTN (ENSG00000155657)           |                                 |                                       |                           |                           | TTN (ENSG00000155657)     | RV - SV                                                                                                                                             |
|                                 | RP11-171J2.3 (ENSG00000271401)  | TTN (ENSG00000155657)                 | TTN (ENSG00000155657)     | TTN (ENSG00000155657)     |                           | LV - EF                                                                                                                                             |
|                                 | RP11-171J2.4 (ENSG00000271141)  | TTN (ENSG00000155657)                 | TTN (ENSG00000155657)     | TTN (ENSG00000155657)     |                           | LV - ESV                                                                                                                                            |
|                                 | RP11-171J2.1 (ENSG00000267784)  | TTN (ENSG00000155657)                 |                           |                           | TTN (ENSG00000155657)     | RV - EDV                                                                                                                                            |
|                                 | RP11-171J2.1 (ENSG00000267784)  | TTN (ENSG00000155657)                 |                           |                           | TTN (ENSG00000155657)     | RV - EF                                                                                                                                             |
|                                 | RP11-171J2.1 (ENSG00000267784)  | TTN (ENSG00000155657)                 |                           |                           | TTN (ENSG00000155657)     | RV - EF                                                                                                                                             |
|                                 | RP11-171J2.1 (ENSG00000267784)  | TTN (ENSG00000155657)                 |                           |                           | TTN (ENSG00000155657)     | RV - ESV                                                                                                                                            |
|                                 |                                 |                                       |                           |                           | TTN (ENSG00000155657)     | LV - SV                                                                                                                                             |
|                                 |                                 |                                       | CCDC141 (ENSG00000163492) | CCDC141 (ENSG00000163492) |                           | LV - ESV                                                                                                                                            |
|                                 |                                 |                                       |                           | CCDC141 (ENSG00000163492) |                           | LV - SV                                                                                                                                             |
|                                 |                                 |                                       |                           | CCDC141 (ENSG00000163492) |                           | RV - EDV                                                                                                                                            |
|                                 |                                 |                                       |                           | CCDC141 (ENSG00000163492) |                           | RV - ESV                                                                                                                                            |
|                                 |                                 |                                       |                           | CCDC141 (ENSG00000163492) |                           | RV - SV                                                                                                                                             |
|                                 | CCDC141 (ENSG00000163492)       | TTN (ENSG00000155657)                 |                           |                           |                           | LV - EDM                                                                                                                                            |
|                                 | CCDC141 (ENSG00000163492)       | TTN (ENSG00000155657)                 | CCDC141 (ENSG00000163492) | CCDC141 (ENSG00000163492) |                           | LV - EDV                                                                                                                                            |
|                                 | RP11-171J2.5 (ENSG00000271011)  | TTN (ENSG00000155657)                 |                           |                           |                           | RV - ESV                                                                                                                                            |
|                                 | RNU7-104P (ENSG00000238542)     | TTN (ENSG00000155657)                 |                           |                           |                           | RV - EDV                                                                                                                                            |



**Table S17:** Comparing the Schmidt et al. discovered CMR genes to three recent CMR GWAS publications. *(continued)*

| Index gene                 | Nearest gene (Schmidt et al.) | Potential causal gene (Schmidt et al.) | Pirruccello et al. 2020   | Pirruccello et al. 2022    | Aung et al.                | CMR trait |
|----------------------------|-------------------------------|----------------------------------------|---------------------------|----------------------------|----------------------------|-----------|
| PRKCA (ENSG00000154229)    |                               |                                        | PRKCA (ENSG00000154229)   | PRKCA (ENSG00000154229)    |                            | LV - ESV  |
| PRLR (ENSG00000113494)     |                               |                                        |                           | PRKCA (ENSG00000154229)    |                            | LV - EF   |
| PXN (ENSG00000089159)      |                               |                                        | PXN (ENSG00000089159)     | PRLR (ENSG00000113494)     |                            | RV - ESV  |
|                            |                               |                                        |                           | PXN (ENSG00000089159)      |                            | LV - ESV  |
|                            |                               |                                        |                           | PXN (ENSG00000089159)      |                            | LV - EF   |
| RBM20 (ENSG00000203867)    |                               |                                        | RBM20 (ENSG00000203867)   | RBM20 (ENSG00000203867)    |                            | LV - ESV  |
|                            |                               |                                        | RBM20 (ENSG00000203867)   | RBM20 (ENSG00000203867)    |                            | LV - EF   |
|                            |                               |                                        |                           | RBM20 (ENSG00000203867)    |                            | LV - EDV  |
|                            |                               |                                        |                           | RBM20 (ENSG00000203867)    |                            | RV - ESV  |
| RHOA (ENSG00000067560)     |                               |                                        |                           | RHOA (ENSG00000067560)     |                            | LV - EDV  |
|                            |                               |                                        |                           | RHOA (ENSG00000067560)     |                            | LV - ESV  |
| RRAS2 (ENSG00000133818)    |                               |                                        | RRAS2 (ENSG00000133818)   | RRAS2 (ENSG00000133818)    |                            | LV - ESV  |
|                            |                               |                                        |                           | RRAS2 (ENSG00000133818)    |                            | LV - EF   |
| RSRC1 (ENSG00000174891)    |                               |                                        |                           | RSRC1 (ENSG00000174891)    |                            | RV - ESV  |
| SH2B3 (ENSG00000111252)    |                               |                                        | SH2B3 (ENSG00000111252)   |                            |                            | LV - EDV  |
|                            |                               |                                        | SH2B3 (ENSG00000111252)   |                            |                            | LV - ESV  |
|                            |                               |                                        |                           | SH2B3 (ENSG00000111252)    |                            | RV - EDV  |
|                            |                               |                                        |                           | SH2B3 (ENSG00000111252)    |                            | RV - ESV  |
| SRL (ENSG00000185739)      |                               |                                        |                           | SRL (ENSG00000185739)      |                            | LV - EDV  |
| TIAL1 (ENSG00000151923)    |                               |                                        |                           | TIAL1 (ENSG00000151923)    |                            | LV - EDV  |
| VEGFA (ENSG00000112715)    |                               |                                        | VEGFA (ENSG00000112715)   |                            |                            | LV - SV   |
|                            |                               |                                        | VEGFA (ENSG00000112715)   |                            |                            | LV - EDV  |
| YIPF5 (ENSG00000145817)    |                               |                                        |                           | YIPF5 (ENSG00000145817)    |                            | LV - EF   |
| ZNF638 (ENSG00000075292)   |                               |                                        | ZNF638 (ENSG00000075292)  | ZNF638 (ENSG00000075292)   |                            | LV - EDV  |
| ACHE (ENSG00000087085)     |                               |                                        |                           | ACHE (ENSG00000087085)     |                            | LV - EDV  |
|                            |                               |                                        |                           | ACHE (ENSG00000087085)     |                            | RV - EDV  |
| ACTBL2 (ENSG00000169067)   |                               |                                        |                           | ACTBL2 (ENSG00000169067)   |                            | LV - ESV  |
| B3GNT7 (ENSG00000156966)   |                               |                                        | B3GNT7 (ENSG00000156966)  | B3GNT7 (ENSG00000156966)   |                            | LV - SV   |
| BEND3 (ENSG00000178409)    |                               |                                        | BEND3 (ENSG00000178409)   |                            |                            | LV - EDV  |
|                            |                               |                                        | BEND3 (ENSG00000178409)   |                            |                            | LV - SV   |
| DAG1 (ENSG00000173402)     |                               |                                        |                           | DAG1 (ENSG00000173402)     |                            | LV - EDV  |
| HCN4 (ENSG00000138622)     |                               |                                        |                           | HCN4 (ENSG00000138622)     |                            | LV - SV   |
| HLF (ENSG00000108924)      |                               |                                        | HLF (ENSG00000108924)     |                            |                            | LV - EF   |
|                            |                               |                                        | HLF (ENSG00000108924)     |                            |                            | LV - ESV  |
| KIAA1462 (ENSG00000165757) |                               |                                        |                           | KIAA1462 (ENSG00000165757) |                            | RV - EDV  |
| MTSS1 (ENSG00000170873)    |                               |                                        | MTSS1 (ENSG00000170873)   |                            |                            | LV - EDV  |
|                            |                               |                                        | MTSS1 (ENSG00000170873)   |                            |                            | LV - ESV  |
| MYH6 (ENSG00000197616)     |                               |                                        | MYH6 (ENSG00000197616)    | MTSS1 (ENSG00000170873)    |                            | LV - SV   |
| OR9Q1 (ENSG00000186509)    |                               |                                        |                           | MYH6 (ENSG00000197616)     |                            | RV - EDV  |
|                            |                               |                                        |                           | OR9Q1 (ENSG00000186509)    |                            | RV - SV   |
|                            |                               |                                        |                           | OR9Q1 (ENSG00000186509)    |                            | RV - SV   |
| PALLD (ENSG00000129116)    |                               |                                        |                           | PALLD (ENSG00000129116)    | PALLD (ENSG00000129116)    | RV - ESV  |
| PIK3CG (ENSG00000105851)   |                               |                                        |                           | PIK3CG (ENSG00000105851)   |                            | LV - SV   |
| RBL2 (ENSG00000103479)     |                               |                                        |                           | RBL2 (ENSG00000103479)     |                            | LV - SV   |
|                            |                               |                                        |                           |                            | RBL2 (ENSG00000103479)     | RV - EDV  |
|                            |                               |                                        |                           |                            | RBL2 (ENSG00000103479)     | RV - ESV  |
| SPATS2L (ENSG00000196141)  |                               |                                        | SPATS2L (ENSG00000196141) |                            |                            | LV - ESV  |
|                            |                               |                                        | SPATS2L (ENSG00000196141) |                            |                            | LV - EDV  |
| SURF6 (ENSG00000148296)    |                               |                                        | SURF6 (ENSG00000148296)   | SPATS2L (ENSG00000196141)  |                            | LV - EDV  |
|                            |                               |                                        | SURF6 (ENSG00000148296)   |                            |                            | LV - SV   |
| AK097794 (ENSG00000243150) |                               |                                        |                           |                            | AK097794 (ENSG00000243150) | RV - ESV  |
|                            |                               |                                        |                           |                            | AK097794 (ENSG00000243150) | RV - EF   |
|                            |                               |                                        |                           |                            | AK097794 (ENSG00000243150) | RV - EDV  |
| ACTN4 (ENSG00000130402)    |                               |                                        |                           |                            | ACTN4 (ENSG00000130402)    | RV - EDV  |
|                            |                               |                                        |                           |                            | ACTN4 (ENSG00000130402)    | RV - ESV  |
| AK311445 (ENSG00000226334) |                               |                                        |                           |                            | AK311445 (ENSG00000226334) | RV - EF   |
| BC038750 (ENSG00000250772) |                               |                                        |                           |                            | BC038750 (ENSG00000250772) | RV - EDV  |
| CAMK2D (ENSG00000145349)   |                               |                                        |                           |                            | CAMK2D (ENSG00000145349)   | RV - ESV  |
| CCDC85C (ENSG00000205476)  |                               |                                        |                           |                            | CCDC85C (ENSG00000205476)  | RV - EF   |
| HSPA4 (ENSG00000170606)    |                               |                                        |                           |                            | HSPA4 (ENSG00000170606)    | RV - EF   |
| LUC7L2 (ENSG00000269955)   |                               |                                        |                           |                            | LUC7L2 (ENSG00000269955)   | RV - EDV  |
|                            |                               |                                        |                           |                            | LUC7L2 (ENSG00000269955)   | RV - SV   |
| SLC6A6 (ENSG00000131389)   |                               |                                        |                           |                            | SLC6A6 (ENSG00000131389)   | RV - EDV  |
|                            |                               |                                        |                           |                            | SLC6A6 (ENSG00000131389)   | RV - ESV  |
|                            |                               |                                        |                           |                            | SLC6A6 (ENSG00000131389)   | RV - EF   |
| SVIL (ENSG00000197321)     |                               |                                        |                           |                            | SVIL (ENSG00000197321)     | RV - EF   |
| TPM2 (ENSG00000198467)     |                               |                                        |                           |                            | TPM2 (ENSG00000198467)     | RV - EF   |
| ACTN2 (ENSG00000077522)    |                               |                                        | ACTN2 (ENSG00000077522)   |                            |                            | LV - EF   |
| AGO2 (ENSG00000123908)     |                               |                                        | AGO2 (ENSG00000123908)    |                            |                            | LV - ESV  |
| AKR1A1 (ENSG00000117448)   |                               |                                        | AKR1A1 (ENSG00000117448)  |                            |                            | LV - EDV  |
|                            |                               |                                        | AKR1A1 (ENSG00000117448)  |                            |                            | LV - ESV  |
| CSRP3 (ENSG00000129170)    |                               |                                        | CSRP3 (ENSG00000129170)   |                            |                            | LV - EF   |

**Table S17:** Comparing the Schmidt et al. discovered CMR genes to three recent CMR GWAS publications. (*continued*)

| Index gene                 | Nearest gene (Schmidt et al.) | Putative causal gene (Schmidt et al.) | Pirruccello et al. 2020    | Pirruccello et al. 2022 | Aung et al. | CMR trait |
|----------------------------|-------------------------------|---------------------------------------|----------------------------|-------------------------|-------------|-----------|
| DEFB136 (ENSG00000205884)  |                               |                                       | CSR3P3 (ENSG00000129170)   |                         |             | LV - ESV  |
| FNDC3B (ENSG00000075420)   |                               |                                       | DEFB136 (ENSG00000205884)  |                         |             | LV - EF   |
| HAND2 (ENSG00000164107)    |                               |                                       | FNDC3B (ENSG00000075420)   |                         |             | LV - ESV  |
| HECTD4 (ENSG00000173064)   |                               |                                       | HAND2 (ENSG00000164107)    |                         |             | LV - EDV  |
|                            |                               |                                       | HECTD4 (ENSG00000173064)   |                         |             | LV - EDV  |
|                            |                               |                                       | HECTD4 (ENSG00000173064)   |                         |             | LV - ESV  |
|                            |                               |                                       | HECTD4 (ENSG00000173064)   |                         |             | LV - SV   |
| HLA-DQA2 (ENSG00000237541) |                               |                                       | HLA-DQA2 (ENSG00000237541) |                         |             | LV - EDV  |
| ILF3 (ENSG00000129351)     |                               |                                       | ILF3 (ENSG00000129351)     |                         |             | LV - ESV  |
| LLPH (ENSG00000139233)     |                               |                                       | LLPH (ENSG00000139233)     |                         |             | LV - EDV  |
|                            |                               |                                       | LLPH (ENSG00000139233)     |                         |             | LV - SV   |
| MAPT (ENSG00000186868)     |                               |                                       | MAPT (ENSG00000186868)     |                         |             | LV - EDV  |
| MECOM (ENSG00000085276)    |                               |                                       | MECOM (ENSG00000085276)    |                         |             | LV - EDV  |
| MITF (ENSG00000187098)     |                               |                                       | MITF (ENSG00000187098)     |                         |             | LV - EF   |
|                            |                               |                                       | MITF (ENSG00000187098)     |                         |             | LV - ESV  |
| NKX2-5 (ENSG00000183072)   |                               |                                       | NKX2-5 (ENSG00000183072)   |                         |             | LV - SV   |
| PTK2 (ENSG00000169398)     |                               |                                       | PTK2 (ENSG00000169398)     |                         |             | LV - EF   |
| RNF207 (ENSG00000158286)   |                               |                                       | RNF207 (ENSG00000158286)   |                         |             | LV - ESV  |
| RPH3A (ENSG00000089169)    |                               |                                       | RPH3A (ENSG00000089169)    |                         |             | LV - SV   |
| RPL22 (ENSG00000116251)    |                               |                                       | RPL22 (ENSG00000116251)    |                         |             | LV - EDV  |
| SESTD1 (ENSG00000187231)   |                               |                                       | SESTD1 (ENSG00000187231)   |                         |             | LV - ESV  |
| SP3 (ENSG00000172845)      |                               |                                       | SP3 (ENSG00000172845)      |                         |             | LV - EDV  |
| SPEN (ENSG00000065526)     |                               |                                       | SPEN (ENSG00000065526)     |                         |             | LV - EDV  |
| SSPN (ENSG00000123096)     |                               |                                       | SSPN (ENSG00000123096)     |                         |             | LV - EF   |
|                            |                               |                                       | SSPN (ENSG00000123096)     |                         |             | LV - ESV  |
| XPC (ENSG00000154767)      |                               |                                       | XPC (ENSG00000154767)      |                         |             | LV - EDV  |
|                            |                               |                                       | XPC (ENSG00000154767)      |                         |             | LV - EF   |
|                            |                               |                                       | XPC (ENSG00000154767)      |                         |             | LV - ESV  |
| ZNF592 (ENSG00000166716)   |                               |                                       | ZNF592 (ENSG00000166716)   |                         |             | LV - EDV  |
|                            |                               |                                       | ZNF592 (ENSG00000166716)   |                         |             | LV - ESV  |
|                            |                               |                                       | ZNF592 (ENSG00000166716)   |                         |             | LV - EF   |

*General:*

For Schmidt et al. both the nearest gene as well as the putative causal gene were recorded and matched to any gene from Pirruccello et al. or Aung et al. [34-36]. The associated cardiac MRI (CMR) trait was recorded in the CMR trait column. Pirruccello et al. [34] analyzed MRI traits not considered by Schmidt et al., which were excluded from the current comparison. The *Index gene column* is used to group entries, with its label either equal to the putative causal gene column, or if this was empty, based on the Pirruccello or Aung assigned gene.

---

**Unique CMR genes**

---

ALDH2 (ENSG00000111275)  
CMSS1 (ENSG00000184220)  
DES (ENSG00000175084)  
HIST3H3 (ENSG00000168148)  
HLA-DRB1 (ENSG00000196126)  
KANSL1 (ENSG00000120071)  
LRLE1 (ENSG00000268955)  
NSF (ENSG00000073969)  
PPP1R1B (ENSG00000131771)  
PROM1 (ENSG00000007062)  
RP11-457K10.1 (ENSG00000242029)  
SCN10A (ENSG00000185313)  
SKI (ENSG00000157933)  
SYNPO2L (ENSG00000166317)  
TBX5 (ENSG00000089225)  
TGFB3 (ENSG00000069702)  
TGM2 (ENSG00000198959)  
ZNF572 (ENSG00000180938)

---

*General:*

The putative genes were assigned based on the criteria described in Supplementary File 2, and were not discovered by Pirruccello et al. or Aung et al. [34-36], irrespective of the LV/RV trait the variants were associated with.

**Table S18:** Unique putative CMR genes, discovered by Schmidt et al.

## Supplementary methods

### Cardiac MRI quality control steps

We had access to 39584 LV and RV CMR scans, derived using a published deep learning algorithm by Ruijsink et al. [7]; Supplementary Figures S1-S2. The first step of the automated quality control assessed image quality. Here an AI algorithm interrogated images on significant artefacts, arrhythmia artefacts, and wrong planning. This was followed by quality control of the output data, identifying improbable values (i.e. SV difference between LV and RV > 25%, unphysiological volume curves).

After passing the automated CMR quality control step 34167 LV and 37827 RV measurements remained. This set of measurements was further curated by excluding subjects with a negative LV or RV CMR measurements, duplicate subjects, or subjects without available genetic data. Furthermore, to minimize influence of pre-existing conditions on LV or RV CMR measurements we excluded subjects with prevalent (cardiac) diseases including pre-existing heart failure (LV-EF  $\leq$  40%); Supplementary Table S2. Lastly, potential outliers were removed by excluding measurements below or above 3 times the interquartile range (Supplementary Table S19).

**Table S19:** The lower and upper limits beyond which a cardiac MRI measurement was excluded from subsequent analysis.

|         | Lower limit | Upper limit |
|---------|-------------|-------------|
| RV-EDV  | -34.1       | 337.3       |
| RV-ESV  | -39.5       | 166.5       |
| RV-SV   | -9.3        | 185.0       |
| RV-EF   | 28.5        | 88.0        |
| RV-PER  | -120.4      | 904.6       |
| RV-PFR  | -117.2      | 723.4       |
| RV-PAFR | -175.9      | 756.6       |
| LV-EDV  | -16.9       | 298.7       |
| LV-ESV  | -27.5       | 142.5       |



|         |        |       |
|---------|--------|-------|
| LV-SV   | −4.6   | 171.2 |
| LV-EF   | 31.0   | 87.8  |
| LV-EDM  | −33.0  | 192.3 |
| LV-PER  | −155.3 | 904.0 |
| LV-PFR  | −134.1 | 768.9 |
| LV-PAFR | 263.5  | 754.6 |

## Supplementary results

Through consensus-based prioritization leveraging 20+ criteria (see Methods in the main text and the Supplementary Locus-view plots) lead variants were mapped to putative causal genes, including 13 cases where lead variants (passing the conservative p-value threshold) in or around these genes affected multiple CMR traits: *TTN*, *TMEM43*, *PROB1*, *DMPK*, *PLEC*, *HLA-B*, *CDKN1A*, *ALPK3*, *SPON1*, *KCNK3*, *KCNH2*, *IGF1R*, and *CMSS1*.

### Comparing the CMR GWAS results to three recent publications

Three recent GWAS by Pirruccello *et al.* and Aung *et al.* [34-36] conducted similar analyses using the UK biobank. To compare our results we first excluded any genetic associations with traits that were not considered in our current publication. For example, Aung *et al.* [35] extracted data on atrial measurements not considered by Schmidt *et al.*. Next, we extract data on the assigned gene identified by each study, additionally recording the CMR traits. We subsequently compared these findings to the nearest gene and the putative causal gene discovered in the current manuscript. Given that many of the CMR traits are closely related, genes were compared irrespective of the type of CMR trait the genetic variants associated with.

Compared to these previous CMR GWAS, we rediscovered 36 putative CMR genes, as well as 18 genes which were unique to the current study (Tables S17-S18). The majority of the putative CMR genes could be linked to cardio-metabolic traits (Figure S4) and included 8 genes which encoded a drugged protein with known

cardio-metabolic indications or side effects.

### *Broader phenotypic effects of CMR variants*

Extracting data from GWAS catalogue (Supplementary Figures S4-S5), we found that our putative CMR genes have been previously implicated with CMR traits from previous GWAS (e.g., LV dilatation, LV mass, and fractal dimension), with electrocardiographic traits (e.g., PR segmentation, QRS duration, QT interval), blood pressure and heart rate; as well as with plasma concentration of various apolipoproteins and cholesterol-containing lipoproteins. The following CMR genes were previously associated with cardiac diseases including: AF (*SYNPO2L*, *TBX5*, *IGF1R*, *GOSR2*, *TTN*, *SCN10A*, *CDKN1A*, *MYO18B*, *KCNH2*) hypertrophic cardiomyopathy (*HSPB7*, *SYNPO2L*, *BAG3*, *NSF*, *FHOD3*, *CDKN1A*, *SMARCB1*), DCM (*BAG3*, *FHOD3*, *TTN*, *SMARCB1*), HF (*SYNPO2L*, *BAG3*); and CHD (*ATXN2*, *ALDH2*, *PTPN11*, *GOSR2*); Supplementary Figure S5.

Additionally, 18 of these putative CMR genes were encoded by a drugged or druggable protein, including compounds with an indication and/or side-effect for AF, HF, and CHD; Supplementary Tables S5-S8.

### *Genetic heritability of CMR traits and pairwise genetic correlation*

BOLT-REML was used to estimate the amount of phenotypic variation that could be explained by narrow-sense genetic heritability (Supplementary Figure S4). Heritability estimates ranged between 36% and 31% for both RV and LV measurements of EDV and ESV, as well as LV-EDM. For LV-MVR, EF and SV of both ventricles heritability ranged between 20% and 29%. Despite an absence of GWAS hits for PFR, LV-PER and LV-PAFR, heritability of these traits was between 6% and 12%.

The pairwise genetic correlation (Supplementary Figure S6) indicated that genetic variants for SV and PER measurements (both LV and RV) were highly correlated (correlation coefficient close to 1.0), as were genetic variants associated with EDV and ESV traits from both ventricles, and variants for LV-PFR and RV-PFR. LV-EDM had a moderately strong correlation (around 0.70) with SV, PER, ESV, EDV of both ventricles. Finally, variants for LV-MVR, RV-EF, and LV-EF showed a positive correlation among themselves (maximum 0.68), and negative correlation with EDV, ESV, EDM, and SV traits (maximum -0.86).

While the number of discovered variants, putative genes, and genetic heritability differed considerably across CMR traits (16 putative

genes for RV-ESV, compared to zero for RV-PFR, LV-PER, and LV-PAFR), the genetic contribution was balanced across both ventricles, and variants for LV and RV measurements were often highly correlated, suggesting similar genetic burden between LV and RV traits. Principal component analysis of the CMR measurement themselves further found that 7 PCs explain more than 90% of the phenotypic variation, where typically LV and RV of a specific trait contributed to the same PC (Figure S3).

#### *GWAS analysis without BSA and SBP adjustment*

The presented GWAS analysis on CMR traits was repeated without covariate adjustment for body surface area (BSA) and systolic blood pressure (SBP). Potentially these variables might act as intermediates positioned between the genetic variant and the considered CMR traits, which would induce selection bias (i.e., collider-stratification bias).

To empirically evaluate the potential influence of BSA and SBP correction we extracted the mean difference from the original GWAS analysis (with BSA+SBP adjustment) and compared these to an analysis without adjustment for these covariates, finding near perfect correlation; Supplementary Figure S7.

## *Locus-view plots*

Locus view plots for all the lead variants from a GWAS of 16 CMR traits. The scatter plot is a zoomed in view of the associations in the chromosomal region around each respective lead variant (lead variant position +/- 250 kbp flanking region). The points are coloured according to each variant's pairwise r-squared ( $r^2$ ) with the lead variant. The track below the scatter plot shows the genes overlapping each region with the < or > next to the gene name indicating the strand for the gene. The exon structure for the canonical transcript each gene is shown with vertical bars. The grid at the bottom of each plot is an incidence matrix of annotations where a red dot indicates that a gene has the respective annotation listed on the y-axis. The annotations are as follows:

- *nearest gene* - Is the nearest canonical transcript to the lead variant. Canonical transcripts are defined by Ensembl (release 105). nearest canonical transcript is calculated as the nearest point of the transcript (either start or end) to the lead variant. Where the transcript overlaps the lead variant it is deemed the closest. Where > 1 transcript overlaps the lead variant the tie is broken by the biggest overlap. Note that in some instances the nearest gene and the nearest transcript differ, this is because gene boundaries are based on a union of all transcripts and not just the canonical one.
- *cardiac annot.* - do any of the genes have a cardiac related annotation in the GeneCards database.
- *cardio ind.* - are any of the genes encoding targets for licensed or developmental drugs indicated for a cardiovascular/cardio-metabolic disease.
- *cardio se.* - do any of the genes encoding targets for licensed drugs have a cardiovascular/cardio-metabolic side effect.
- *sig. MR effect* - do any of the genes have a significant *cis*-MR association ( $-\log_{10} P > 5.35$ ) with the respective CMR trait.
- *any sig. MR effect* - do any of the genes in the region have a significant *cis*-MR association with any CMR trait (not necessarily the one in the locus view).

- *sug. MR effect* - do any of the genes in the region have a suggestive *cis*-MR association ( $1.3 < -\log_{10} P \leq 5.35$ ) with the respective CMR trait.
- *any sug. MR effect* - do any of the genes in the region have a suggestive *cis*-MR association with any CMR trait.
- *cardiovascular GWAS* - have any of the genes been listed in the GWAS catalog 'SNP\_GENE\_IDS' column for cardiovascular disease.
- *cardiac biomarker GWAS* - have any of the genes been listed in the GWAS catalog 'SNP\_GENE\_IDS' column for a cardiac biomarker.
- *lipid biomarker GWAS* - have any of the genes been listed in the GWAS catalog 'SNP\_GENE\_IDS' column for a lipid biomarker.
- *blood pressure GWAS* - have any of the genes been listed in the GWAS catalog 'SNP\_GENE\_IDS' column for a blood pressure measure.
- *diabetes GWAS* - have any of the genes been listed in the GWAS catalog 'SNP\_GENE\_IDS' column for a diabetes trait.
- *heart e/sQTLs* - Has the lead variant been identified as a expression (e) or splice (s) quantitative trait loci for any genes GTEx heart tissues.
- *vascular e/sQTLs* - Has the lead variant been identified as an e/sQTL for any genes GTEx artery tissues.
- *any pQTLs* - Has the lead variant been identified as a protein QTL in the plasma for any genes in the region.
- *trans loci link* - Do any of the genes in the loci encode proteins that have trans pQTL associations that occur in other loci (not necessarily for the same CMR phenotype).
- *P-P loci direct link* - Do any of the proteins encoded by genes in the loci have a direct protein-protein interaction with any proteins encoded by genes that overlap any other CMR loci (not necessarily for the same CMR phenotype)
- *P-P loci common link* - Do any of the proteins encoded by genes in the loci have a direct protein-protein interaction with a common protein that is also interacting with proteins encoded by genes that overlap any other CMR loci (not necessarily for the same CMR phenotype)
- *P-P direct cardio drug target ind.* - Do any of the proteins encoded by genes in the loci have a direct protein-protein interaction with a protein targeted by drugs with a cardio-metabolic indication
- *P-P link sig. MR effect* - Do any of the proteins encoded by genes in the loci have a direct protein-protein interaction with a protein that has a significant MR association with a CMR phenotype (not necessarily for the same CMR phenotype)
- *is druggable* - are any of the genes annotated as potentially

druggable or the targets for existing/developmental compounds.

- *is coding* - Is the gene protein coding.

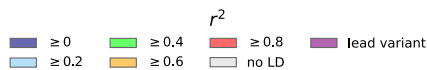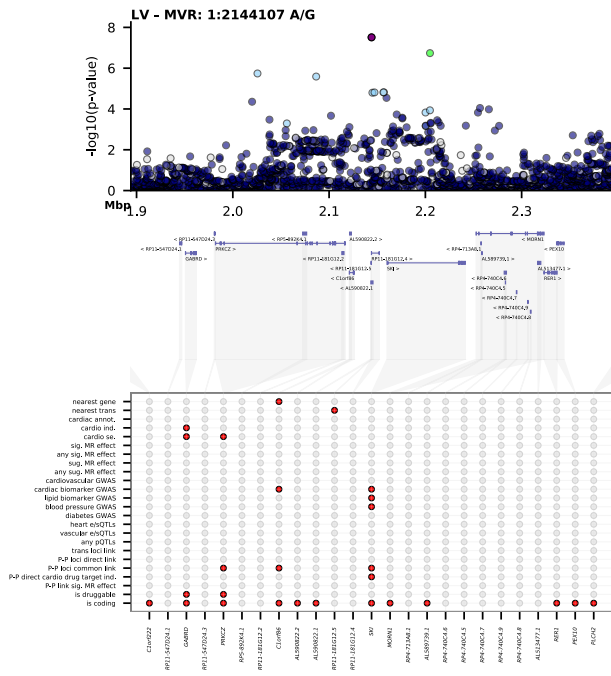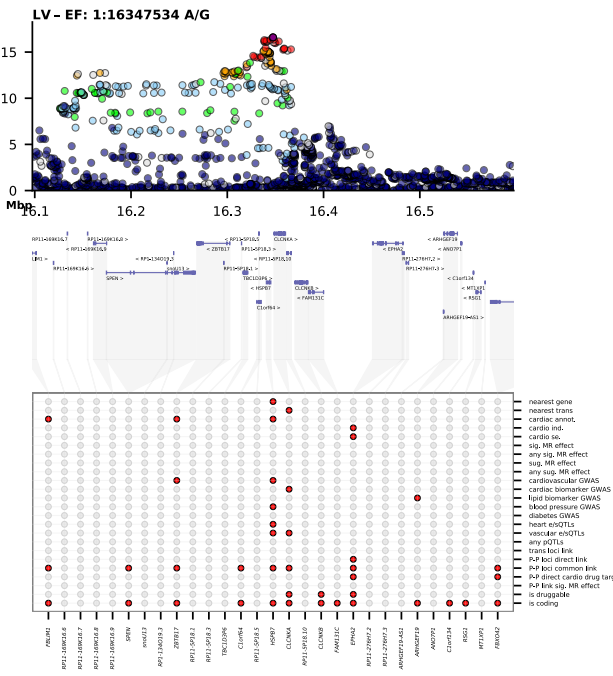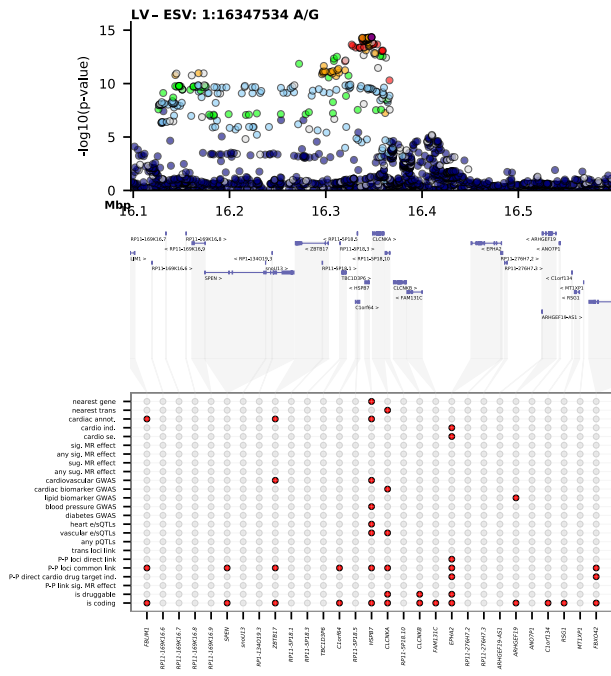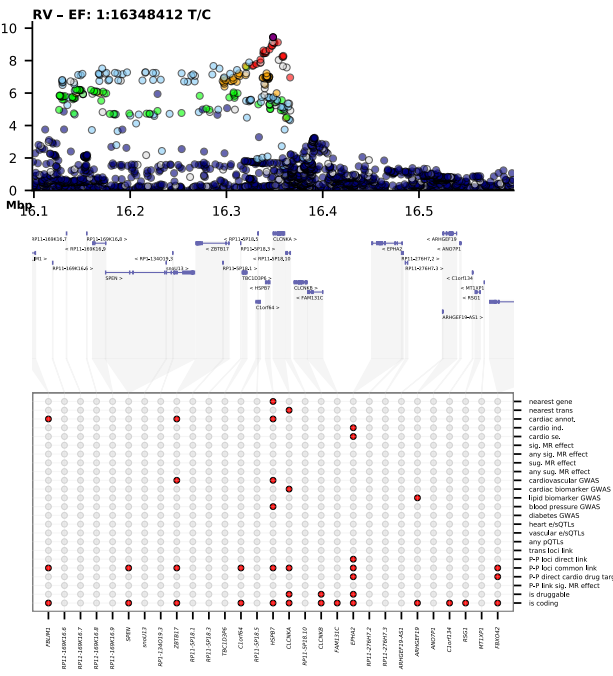

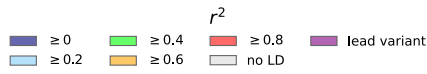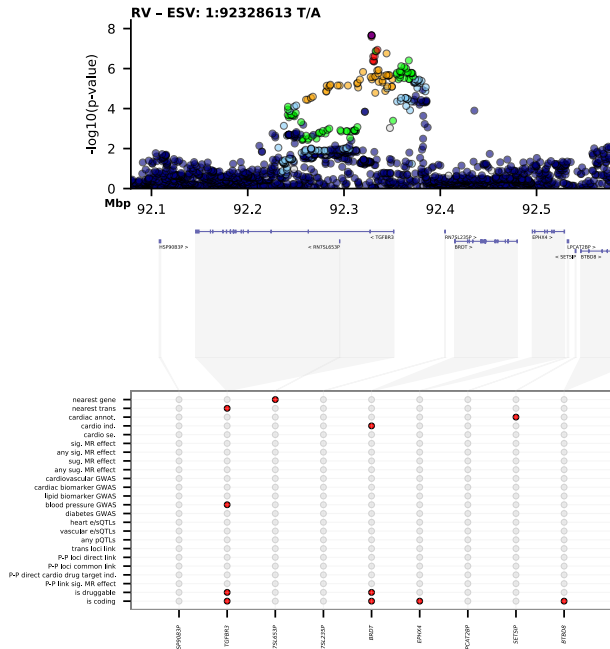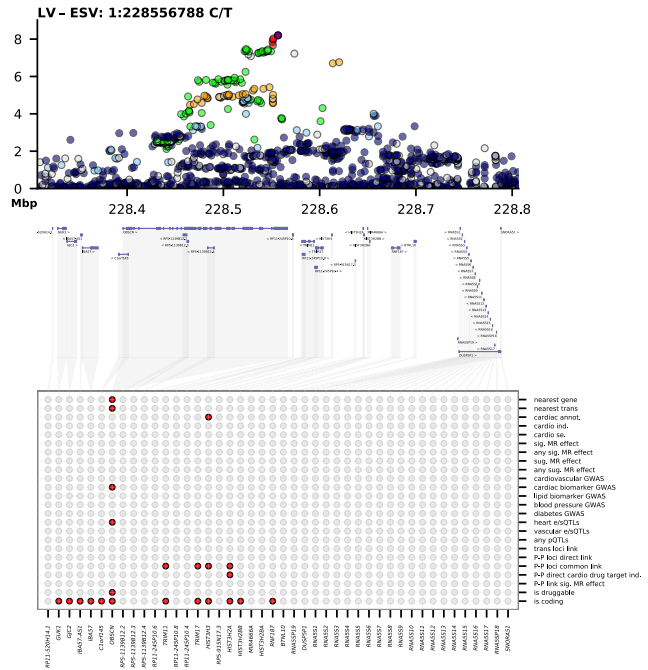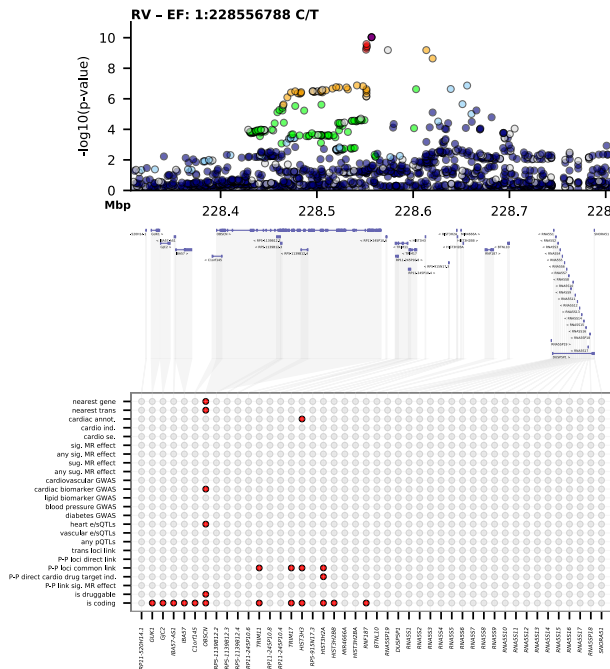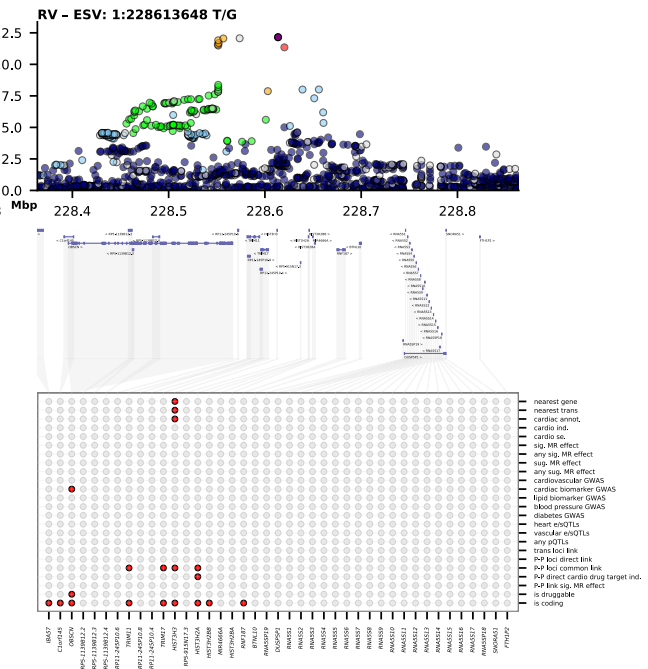



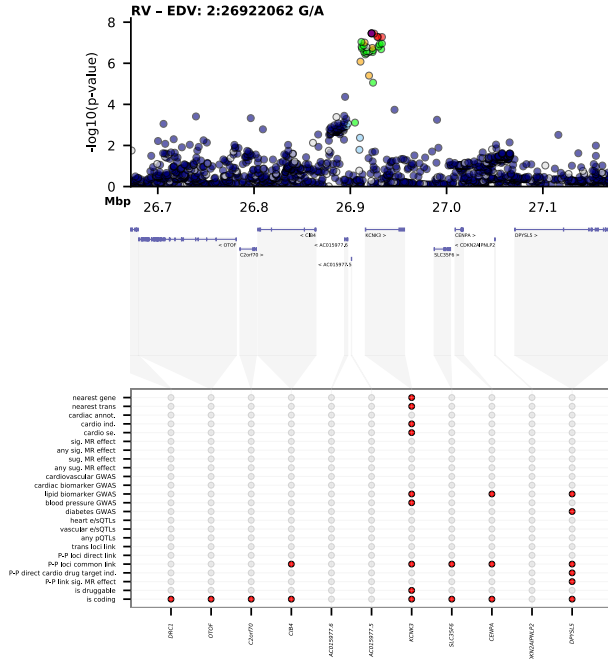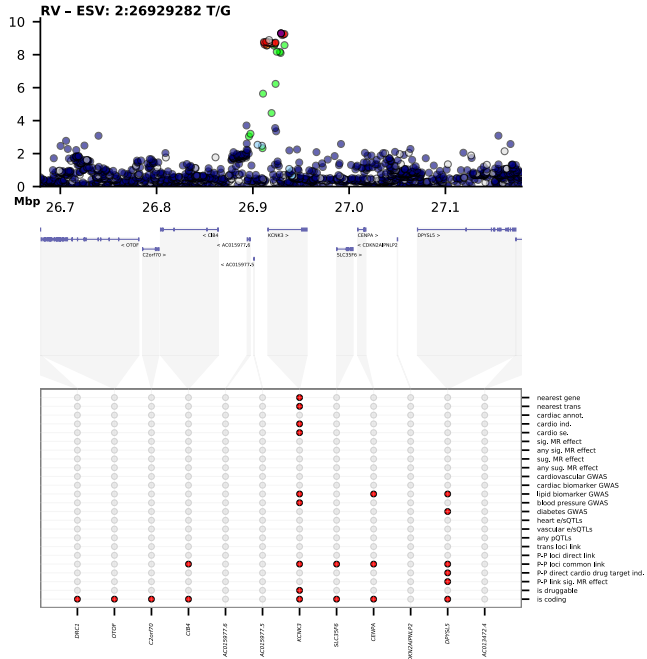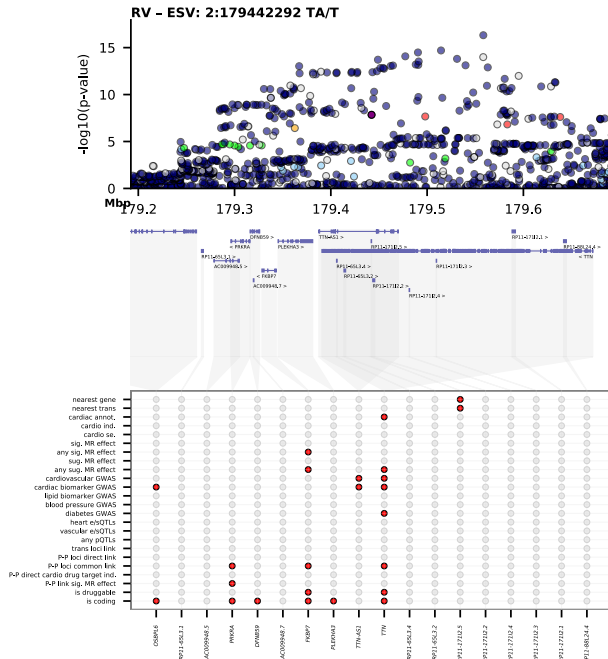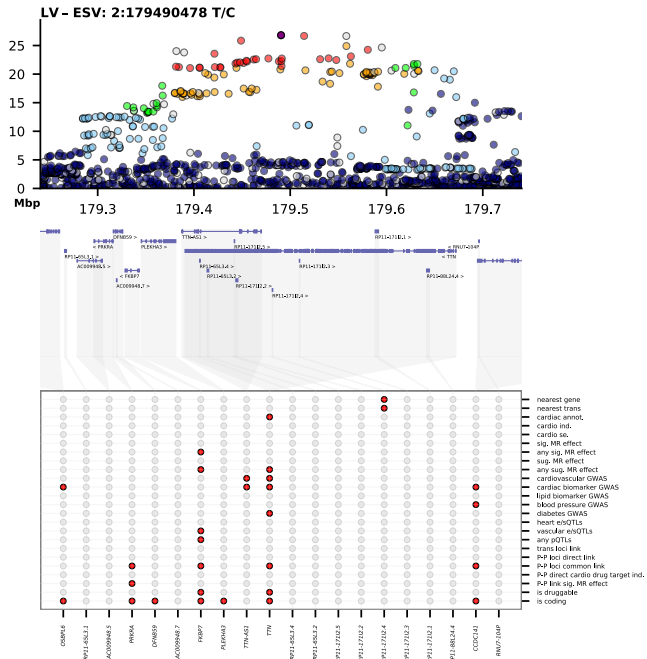







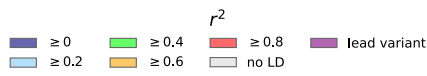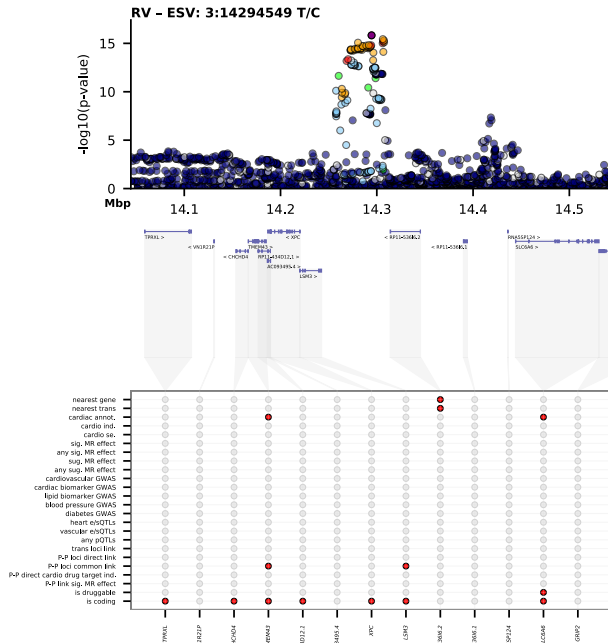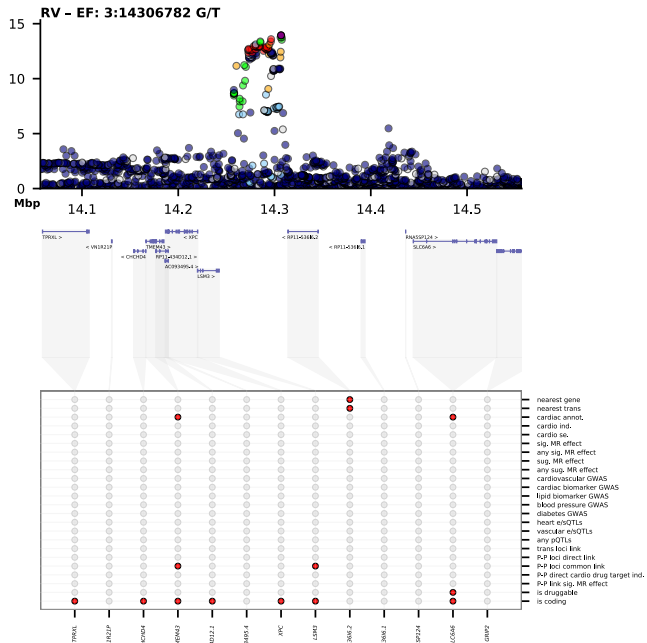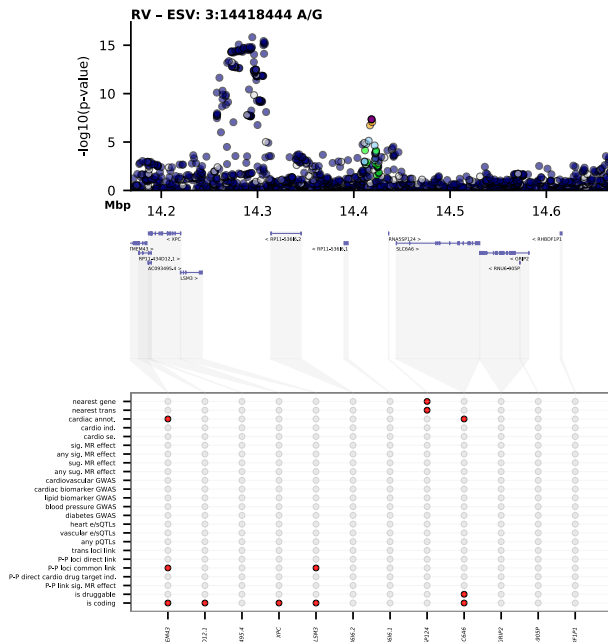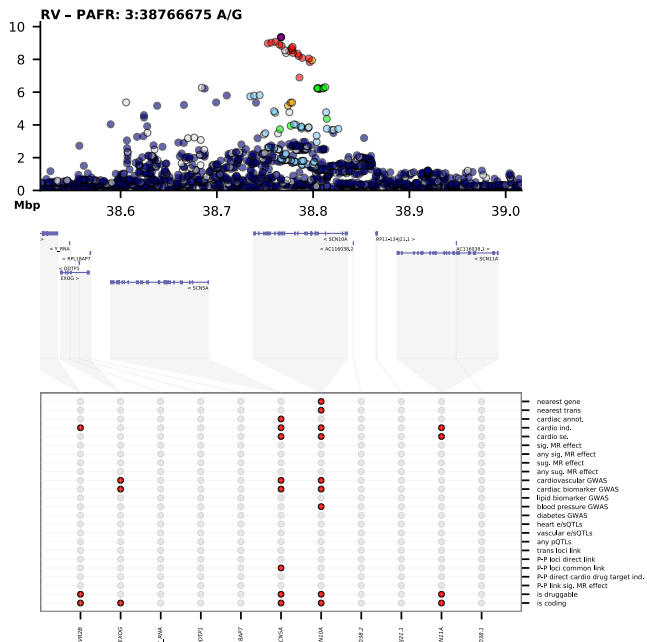

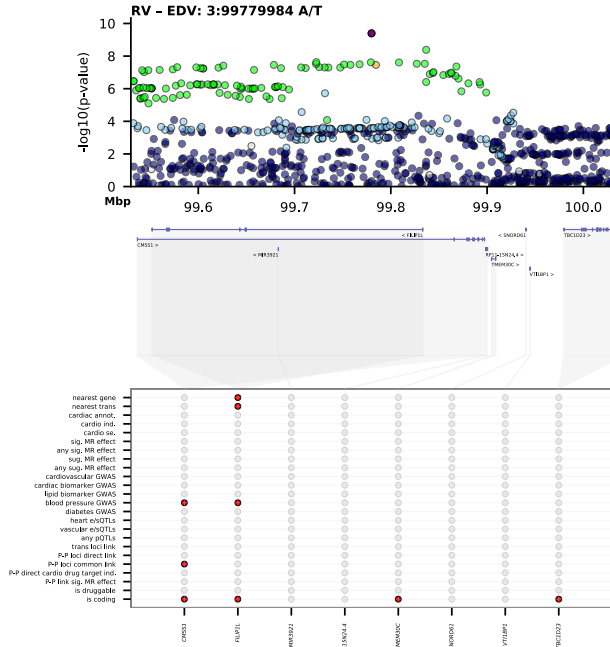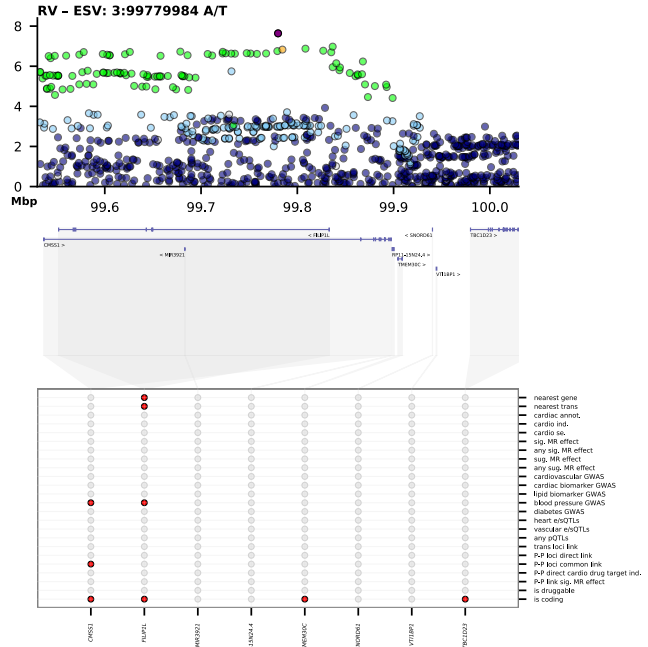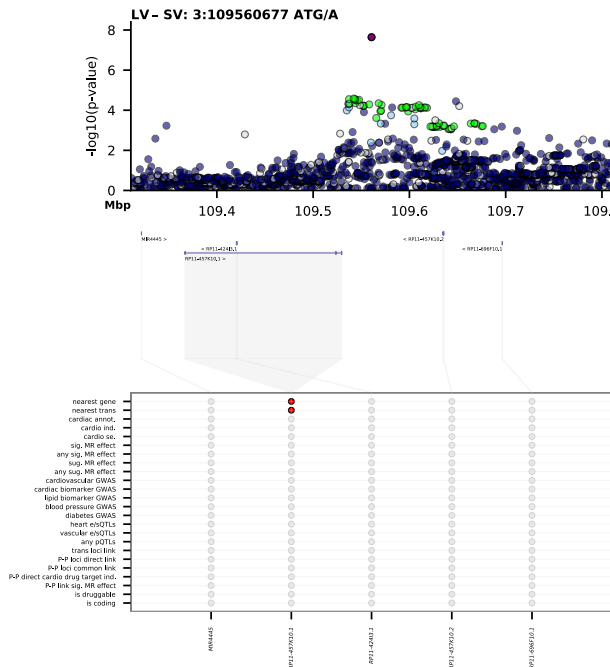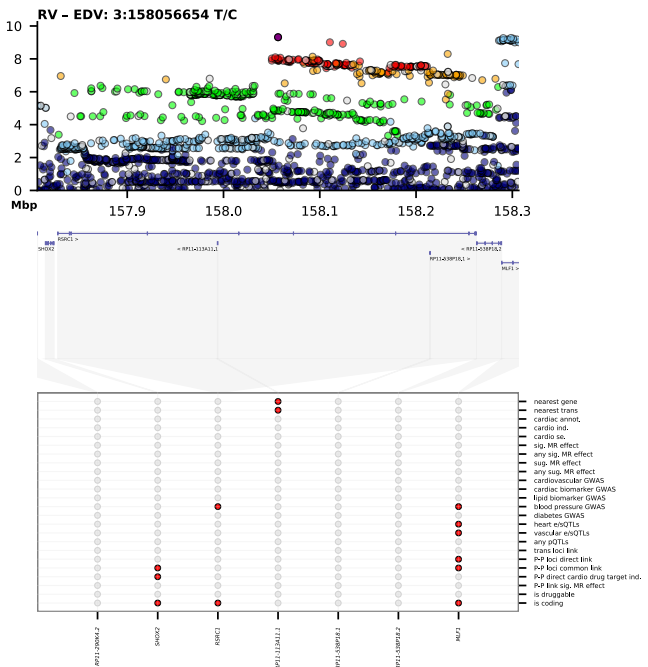

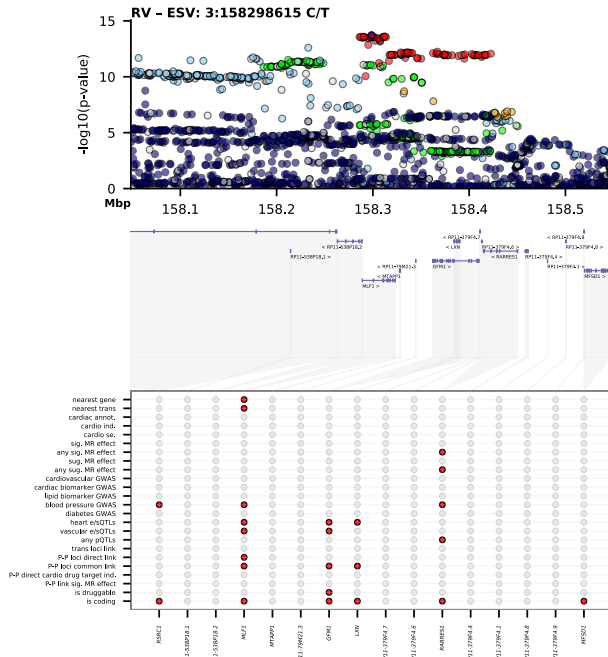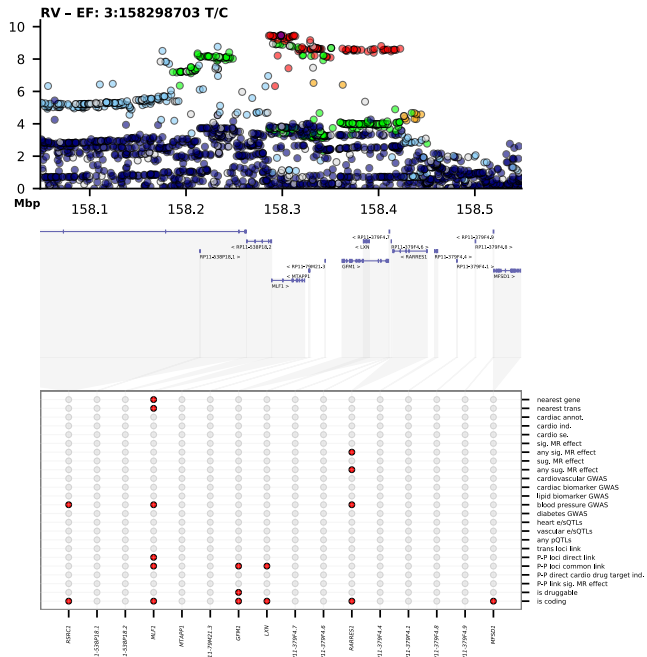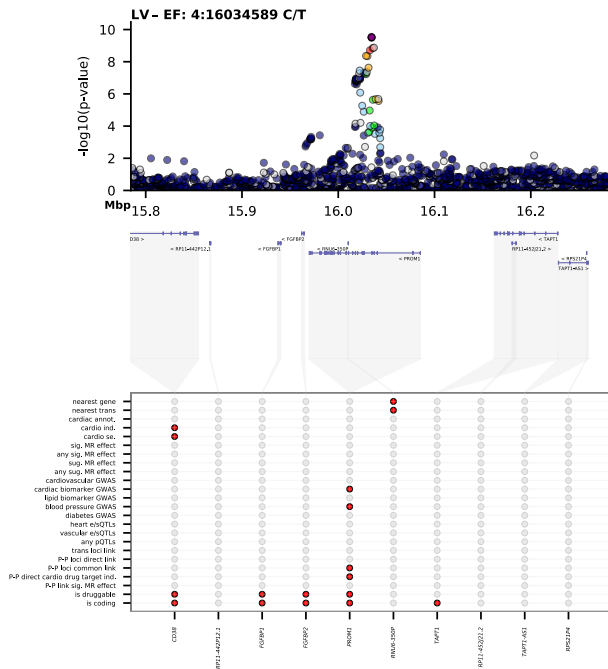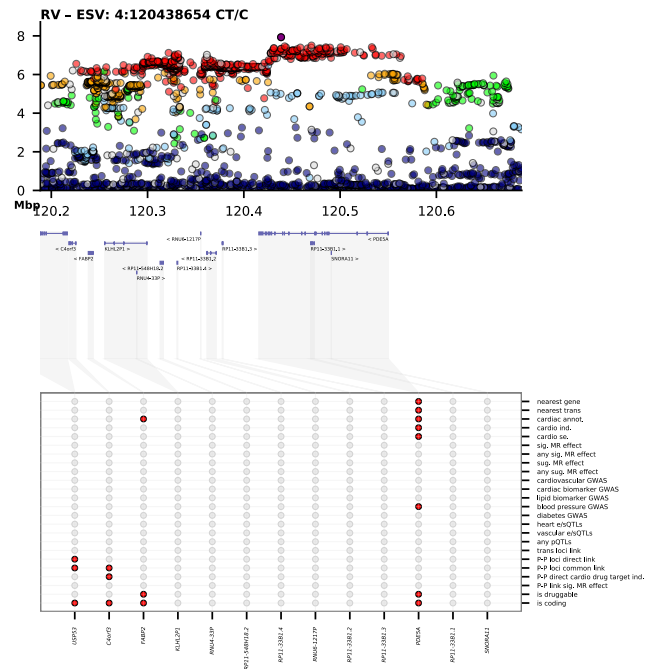

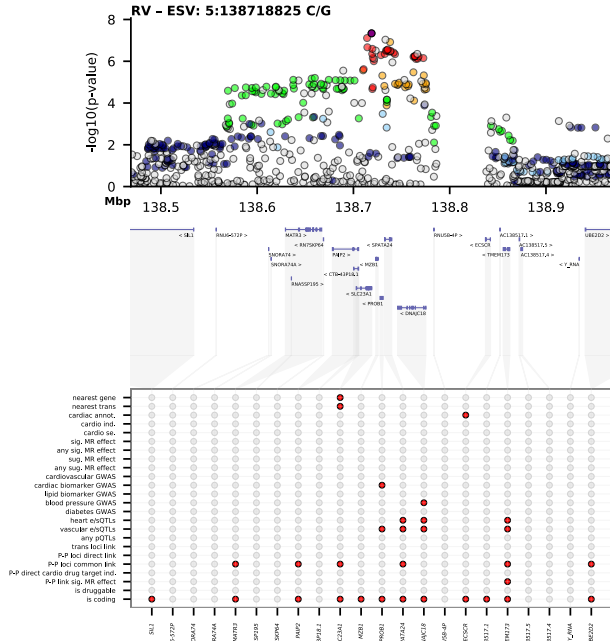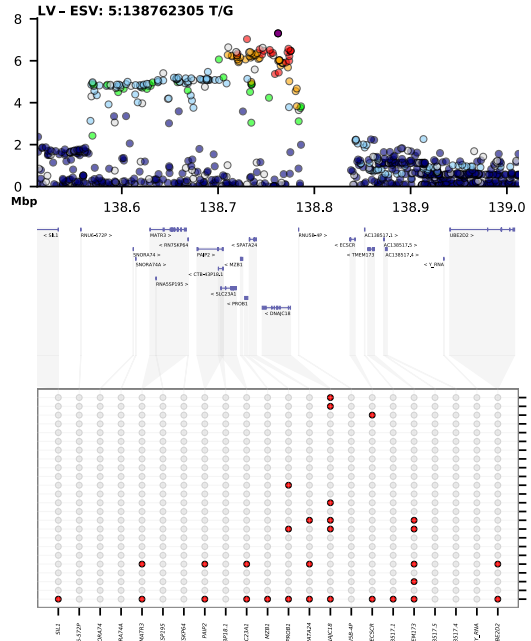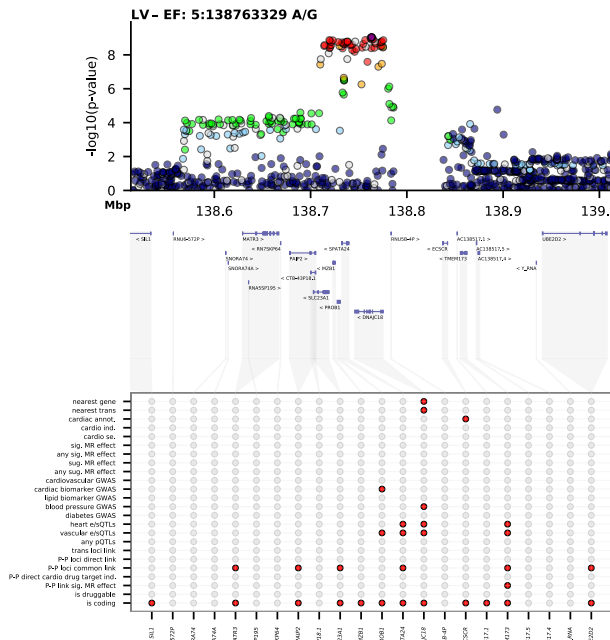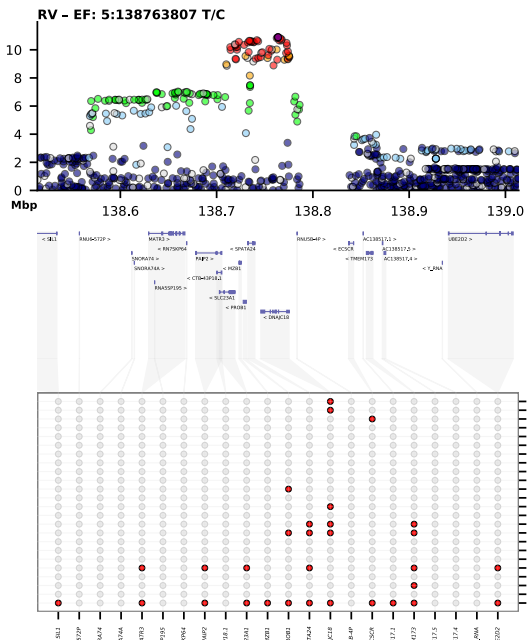



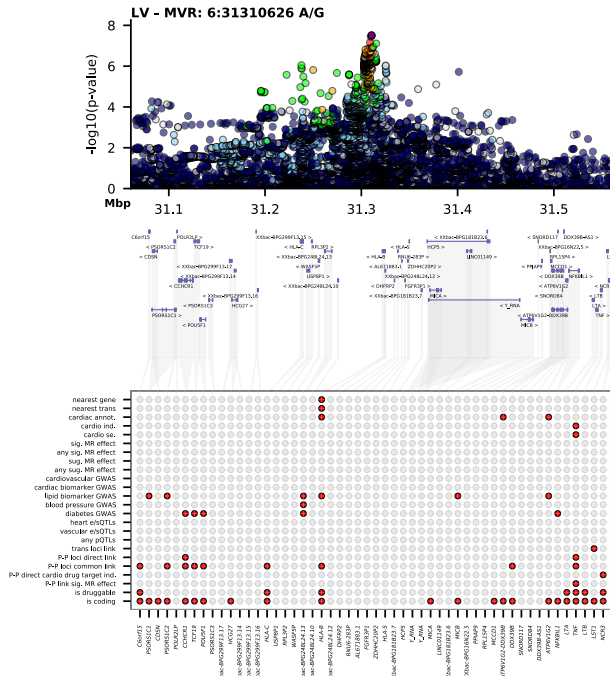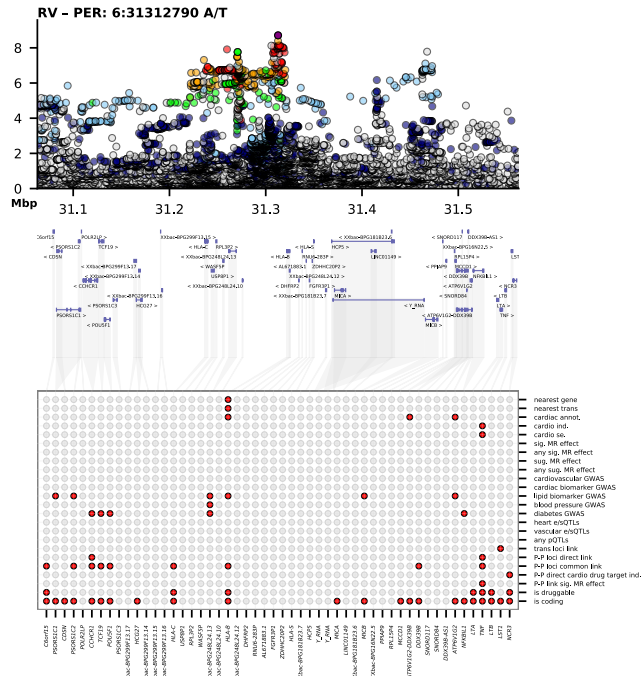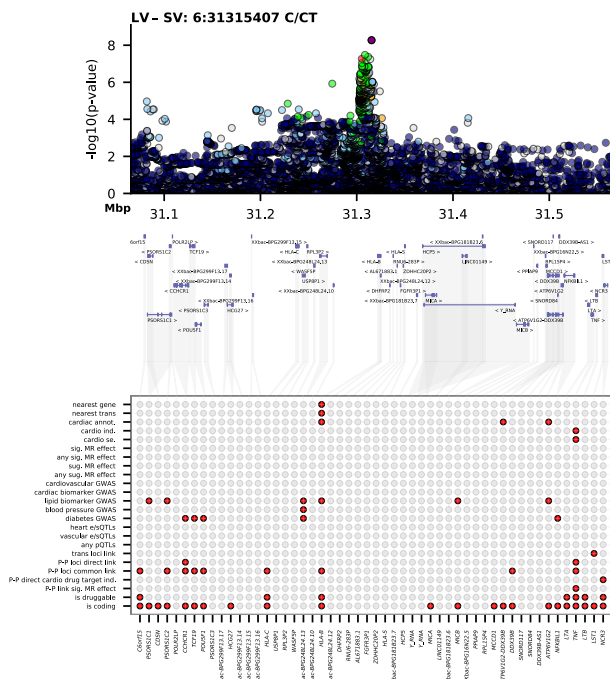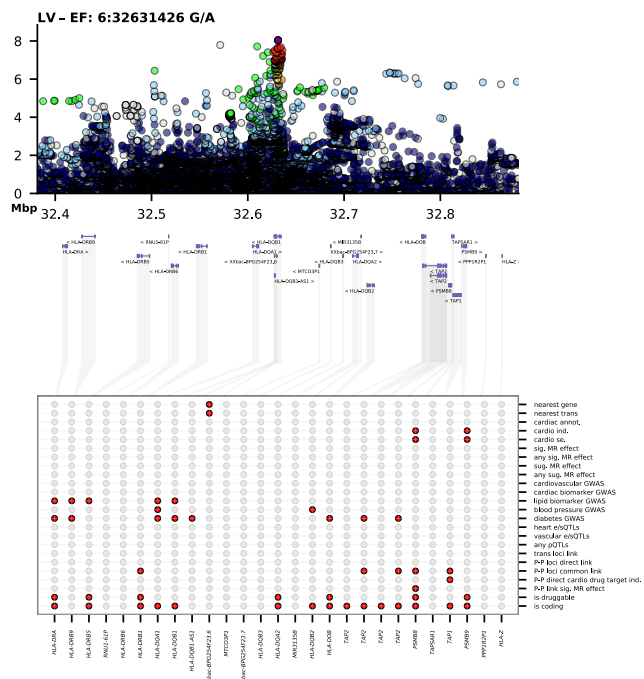

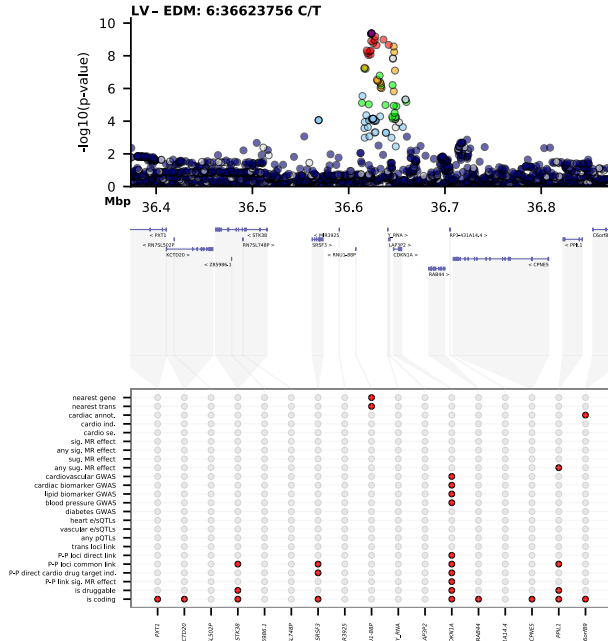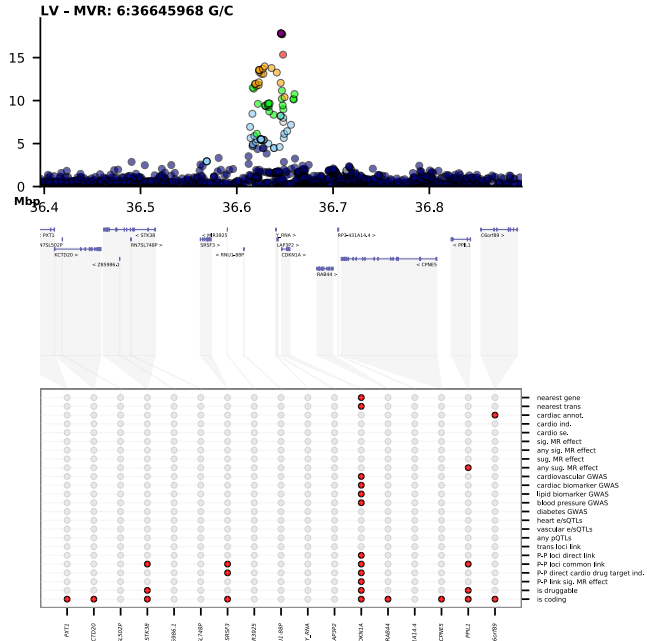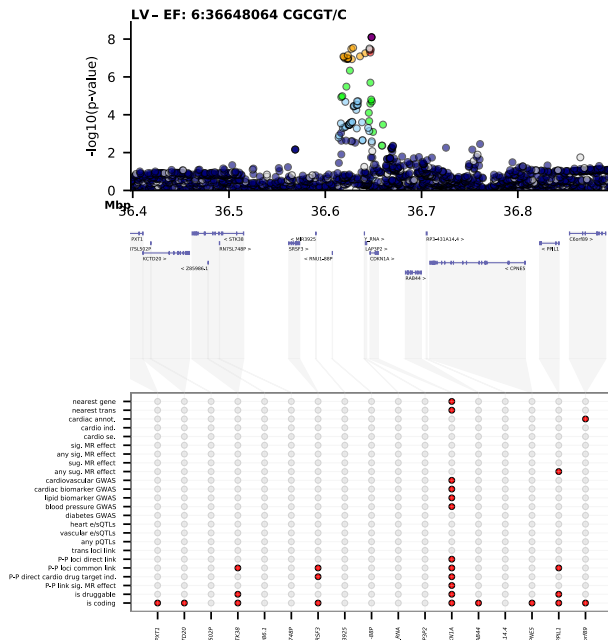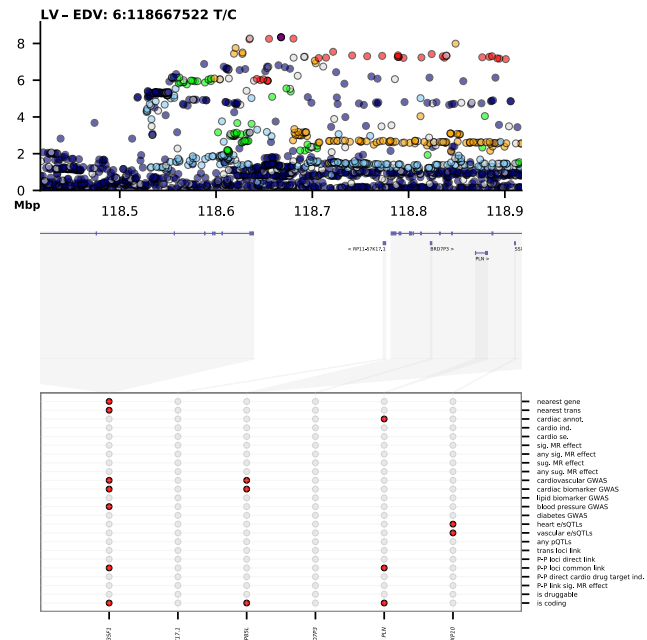

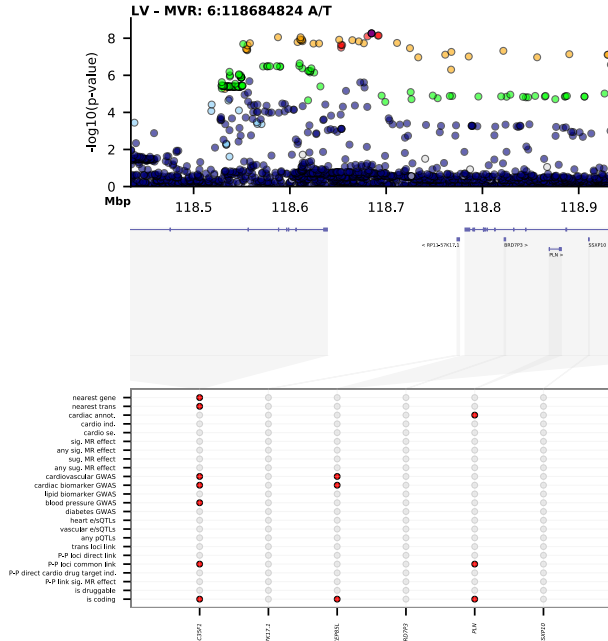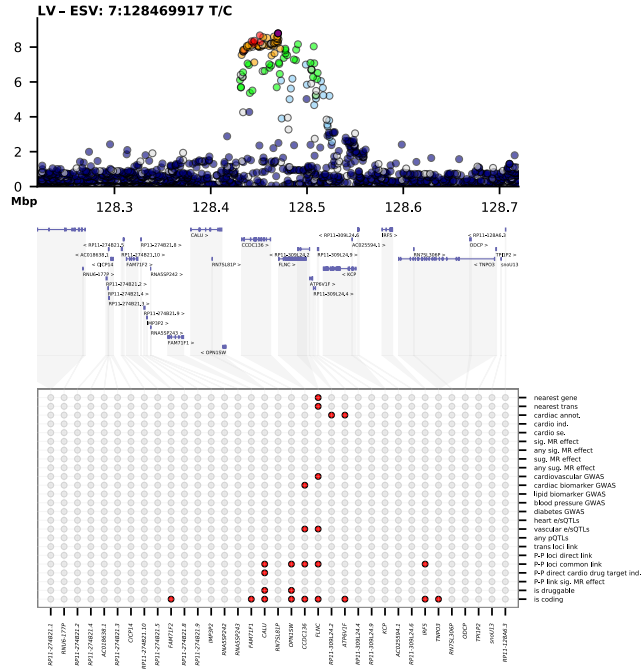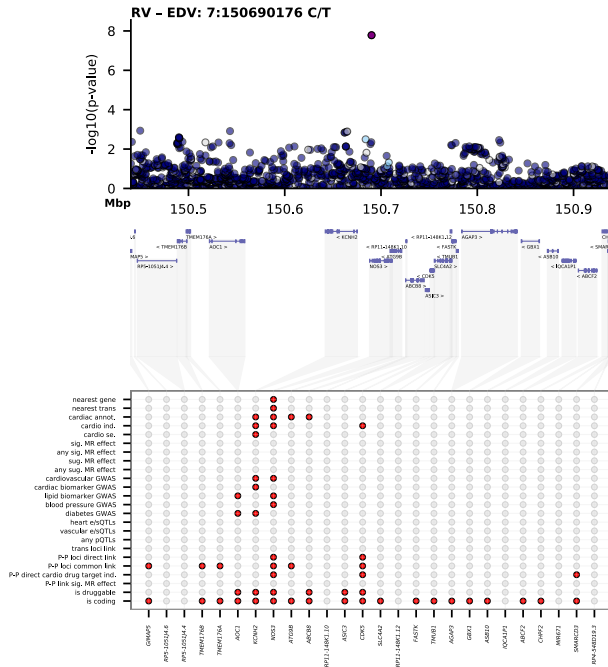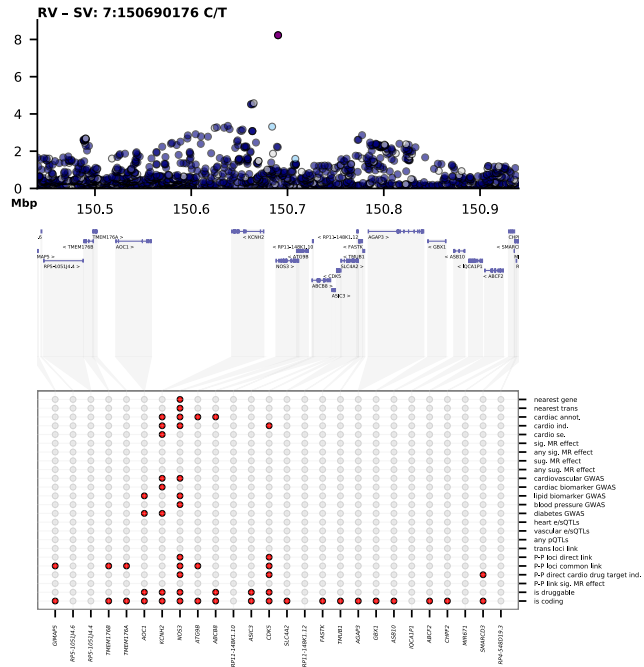

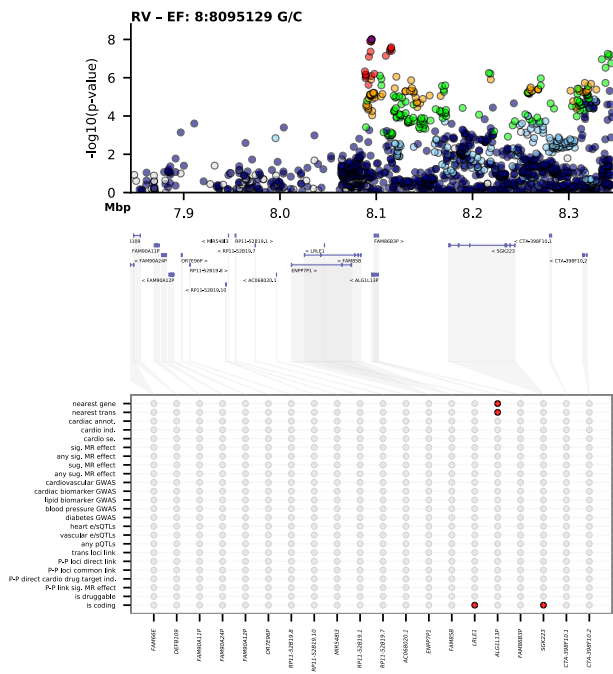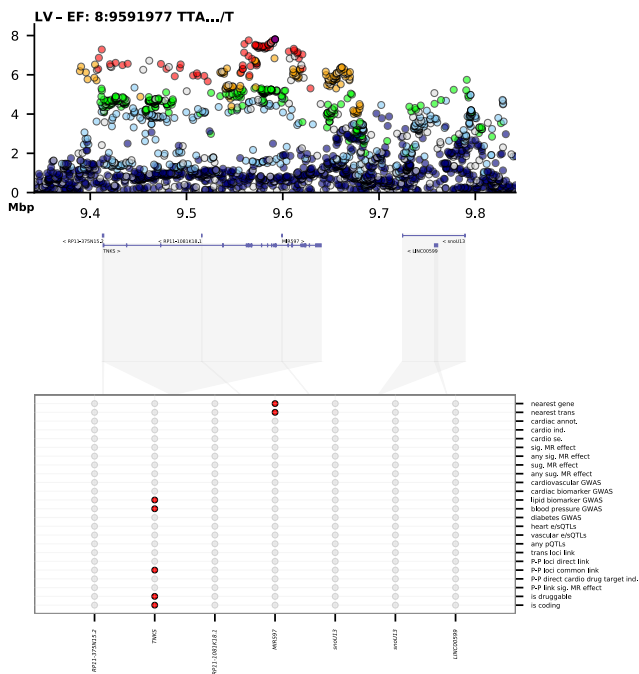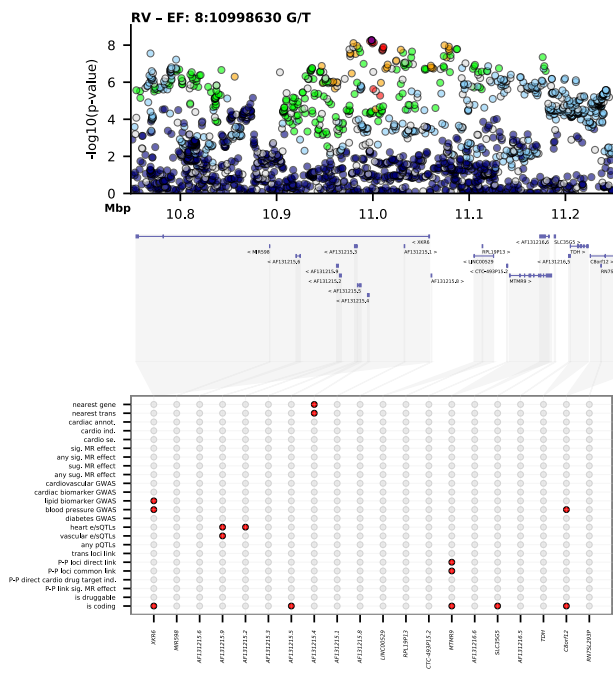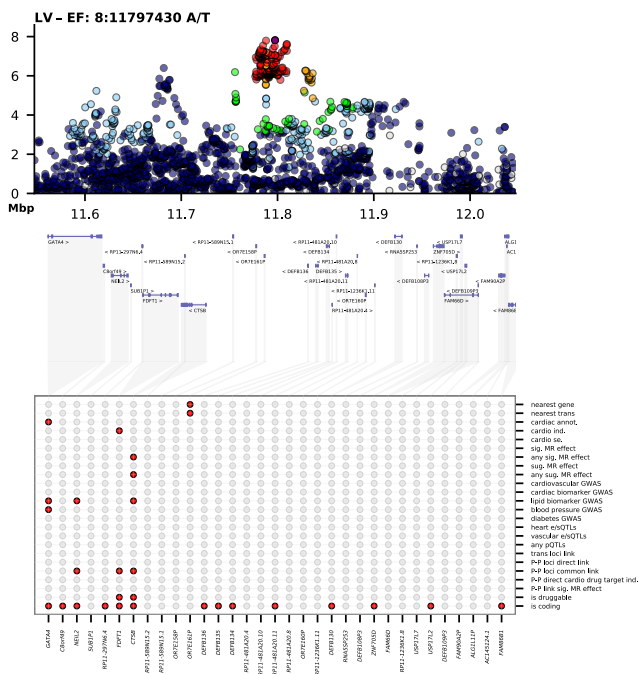



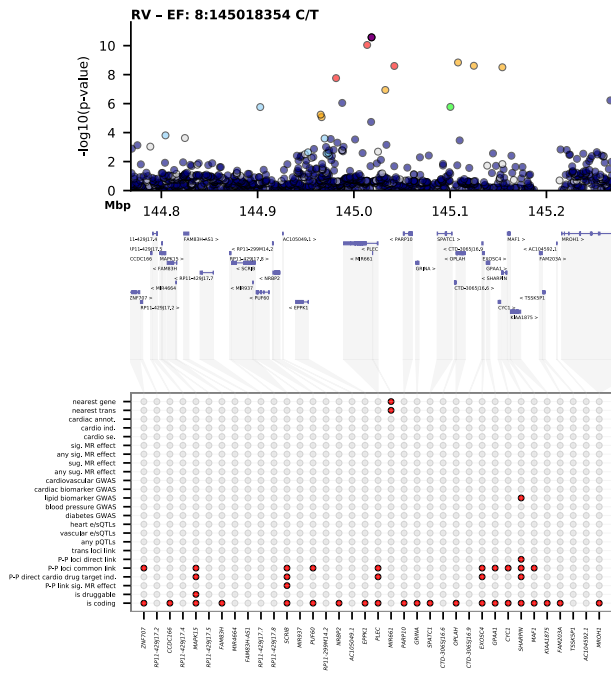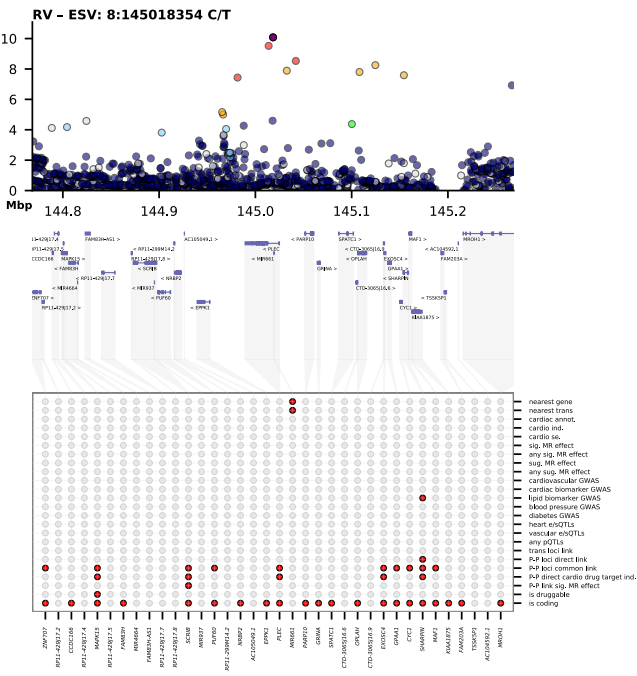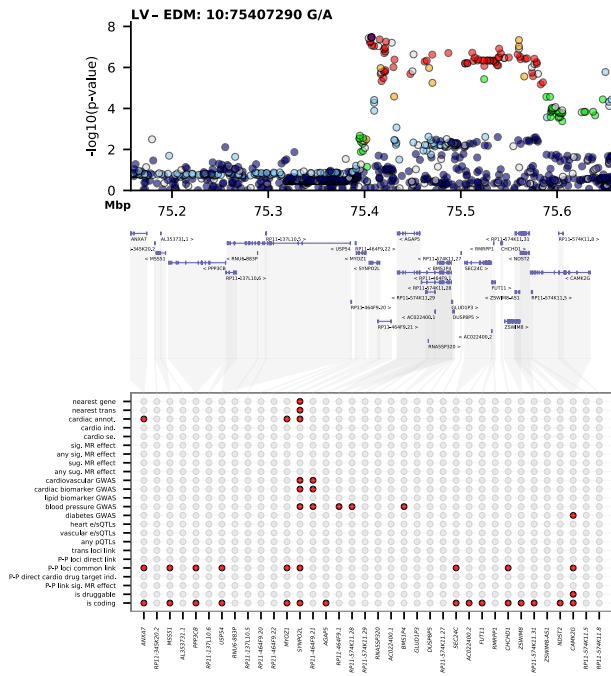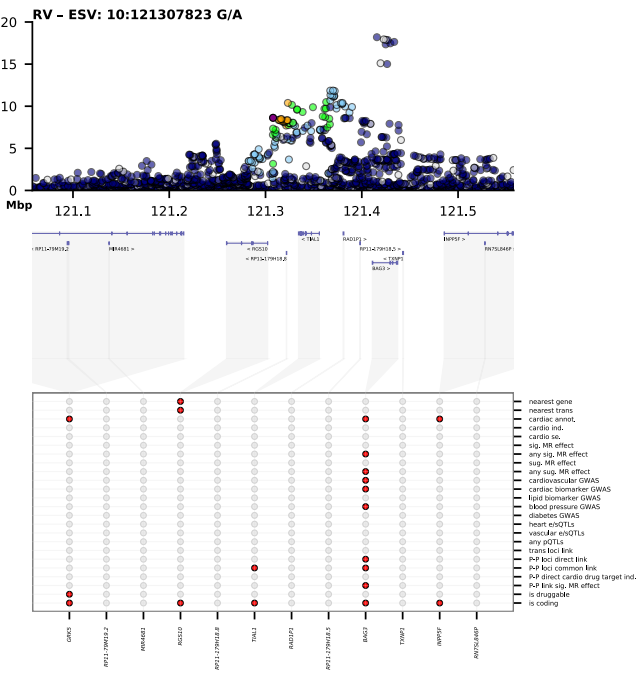

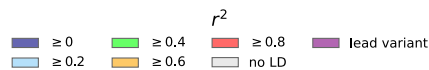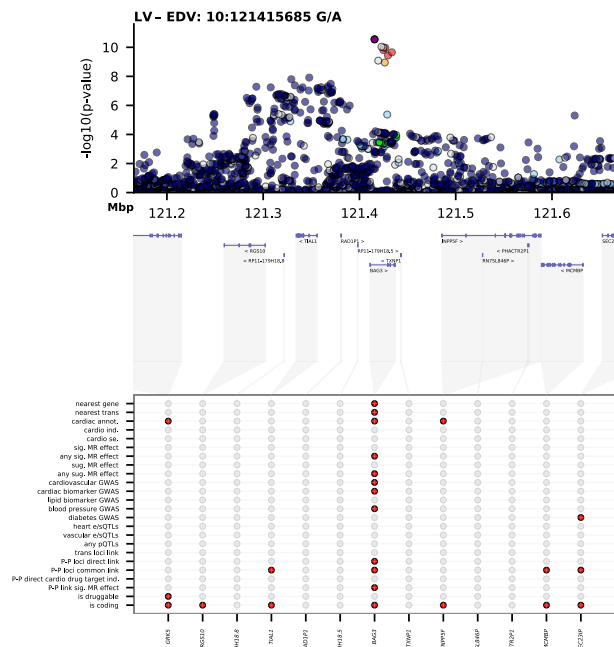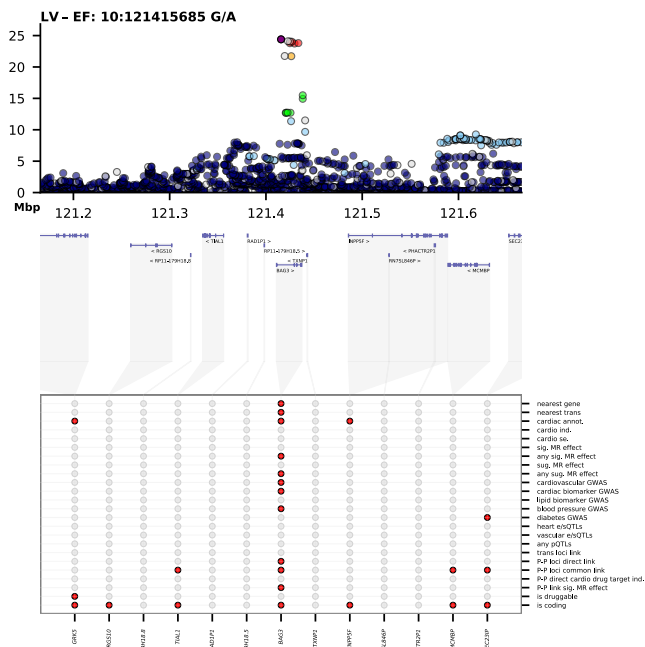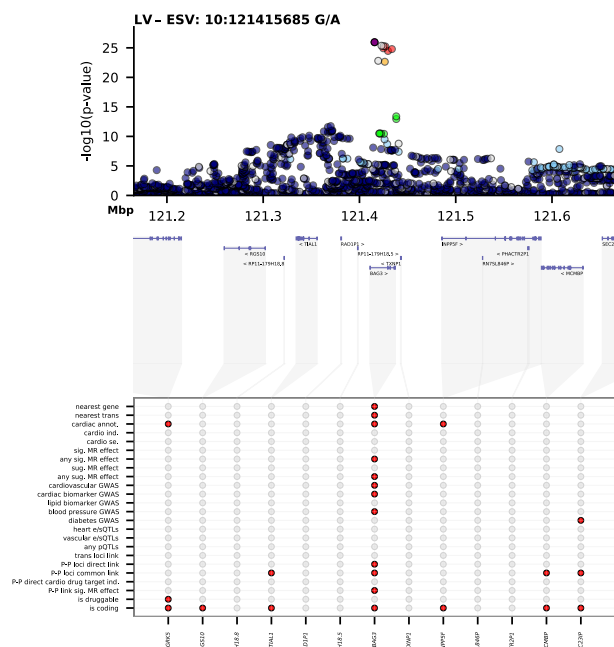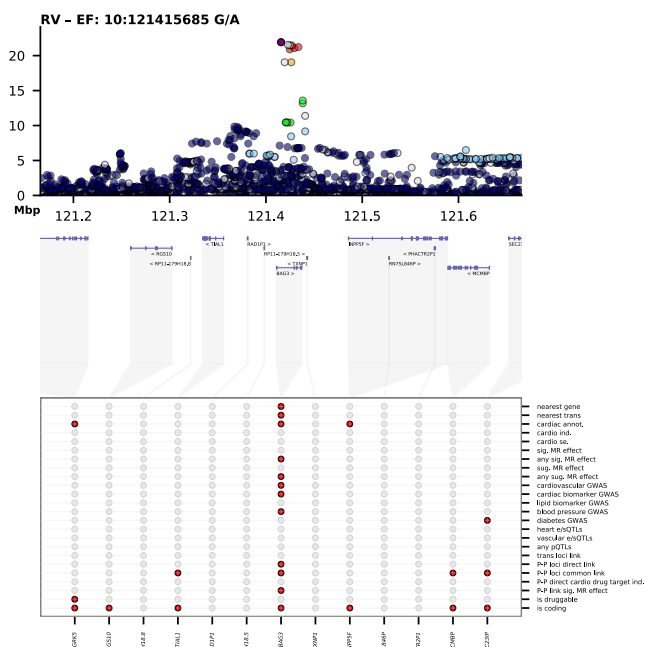

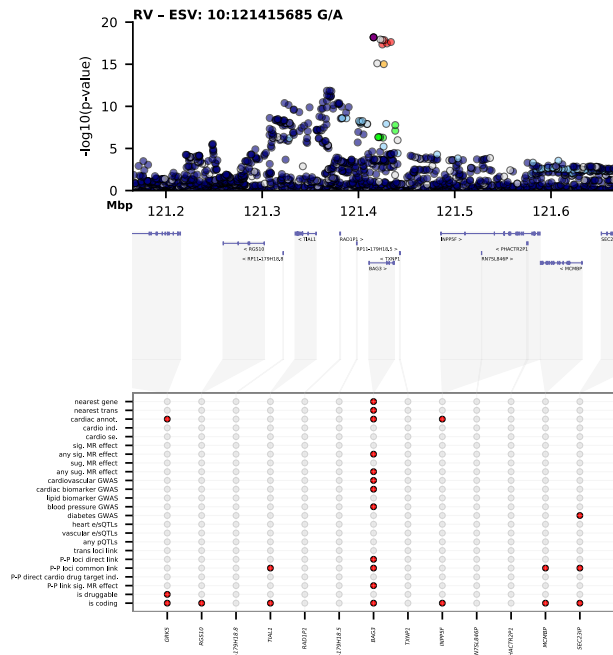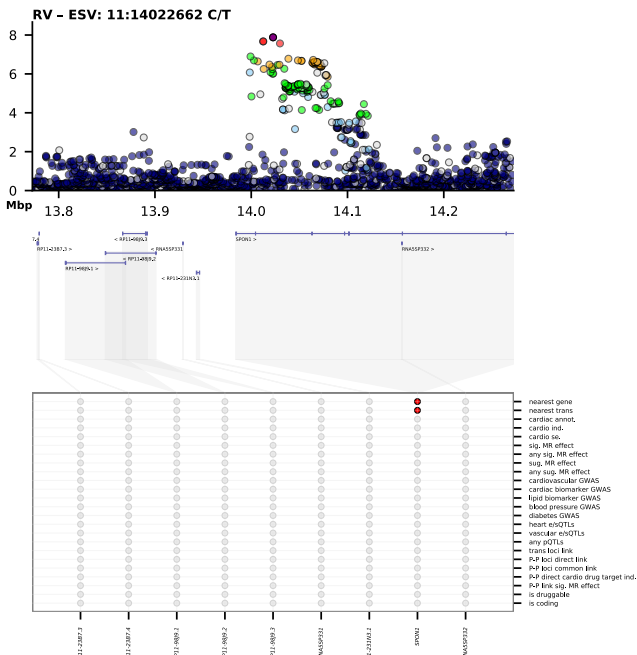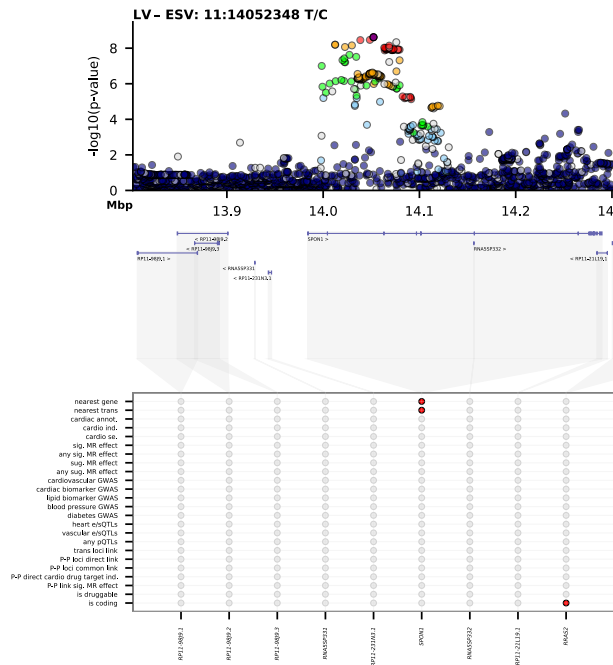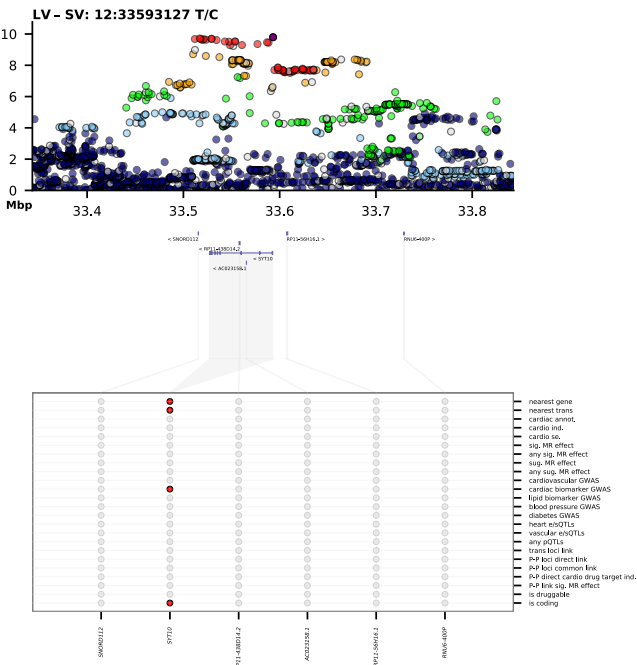





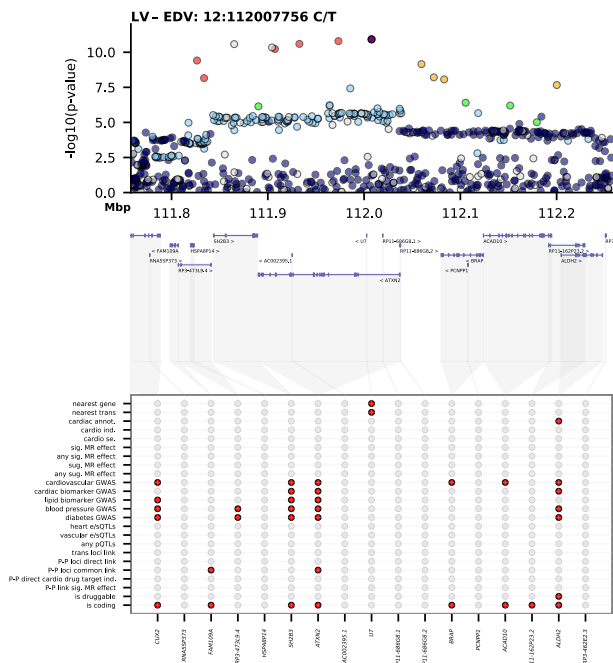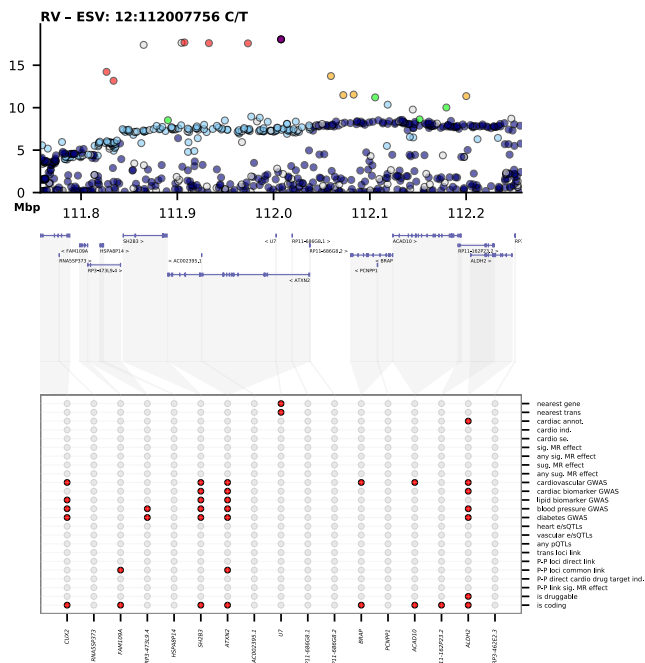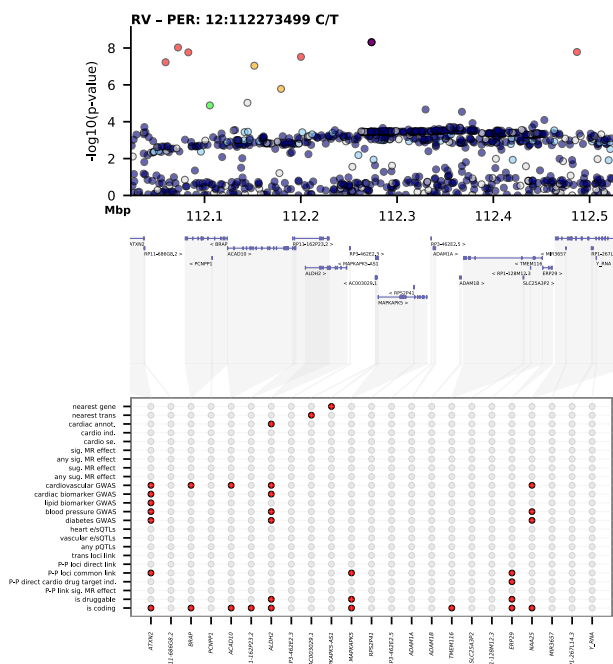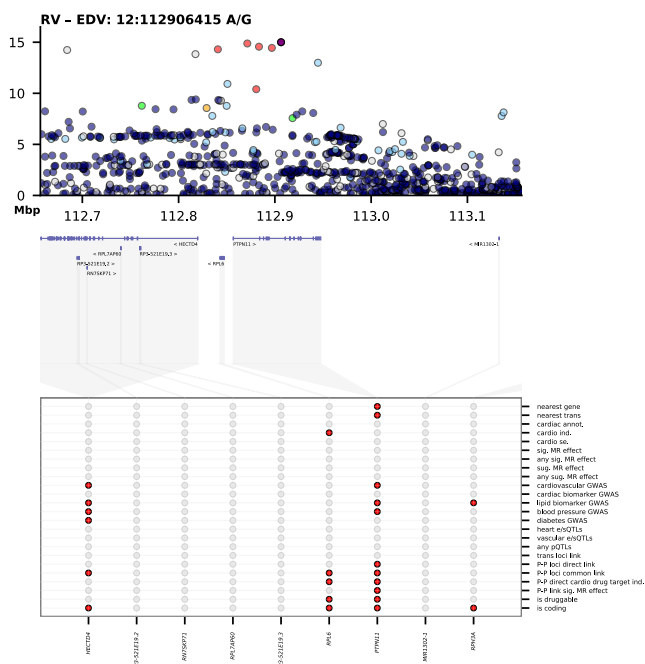

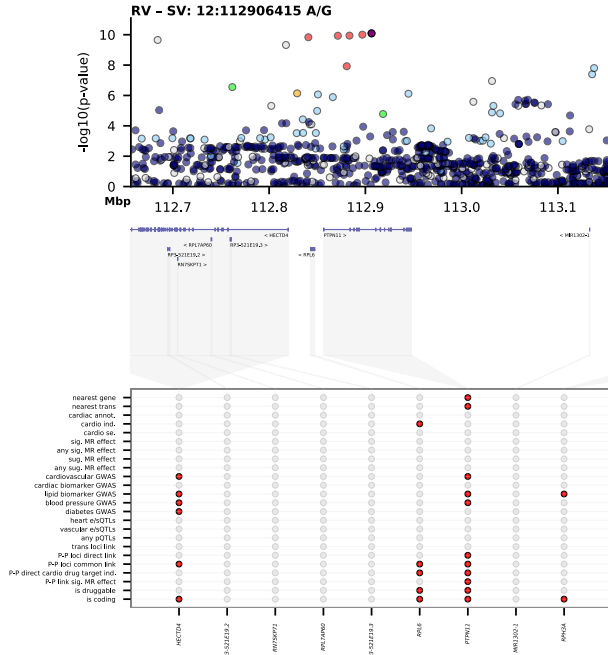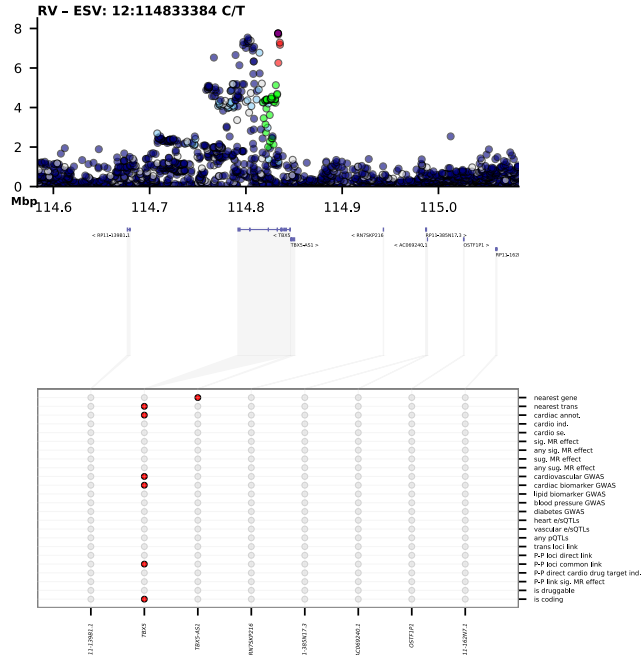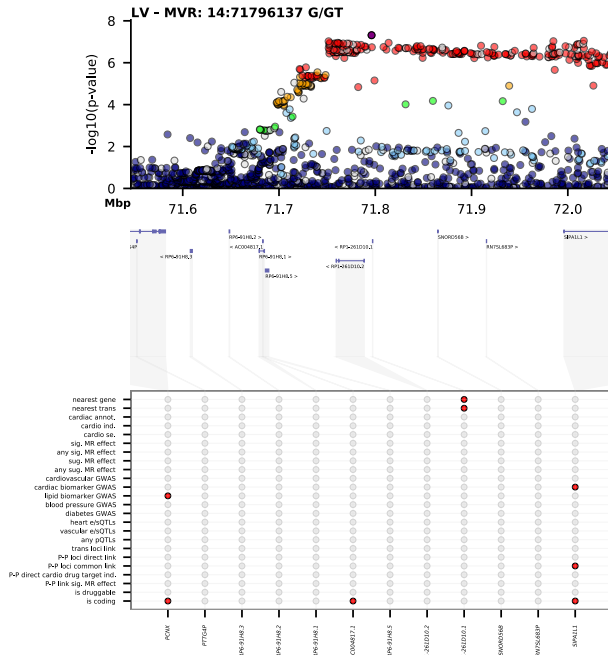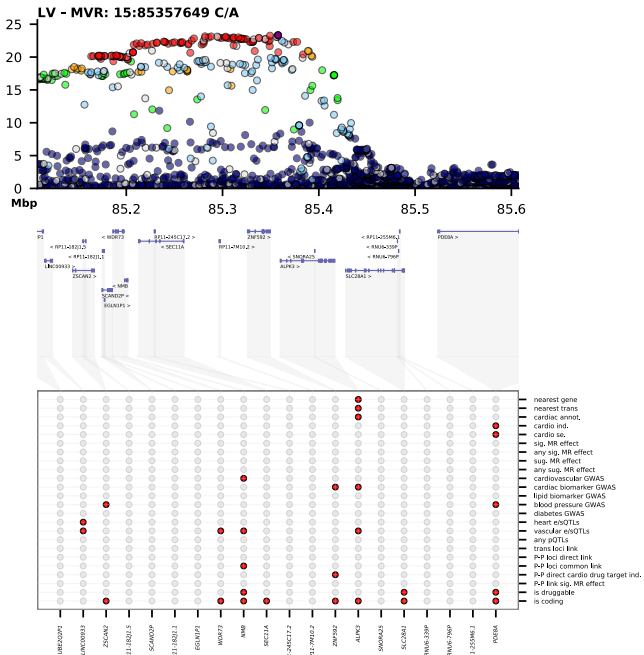



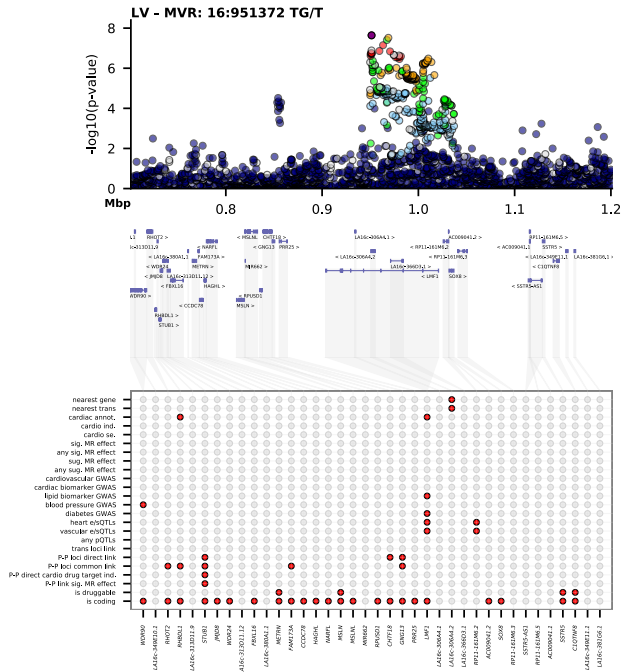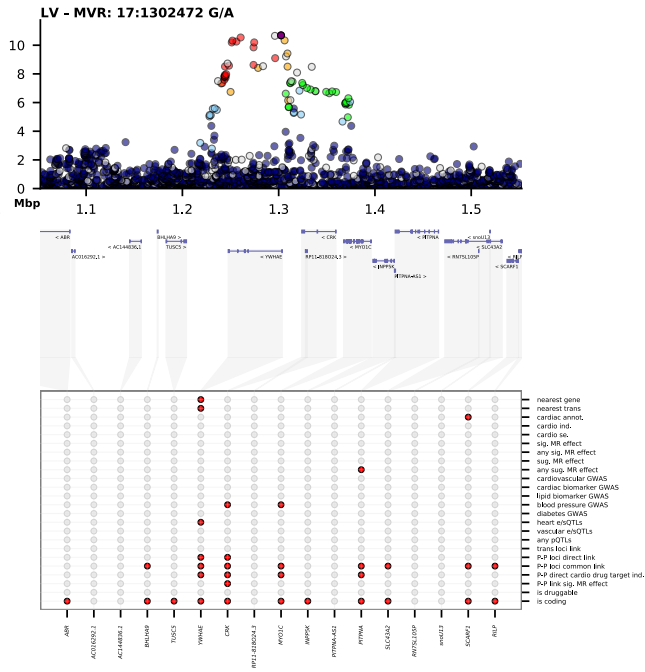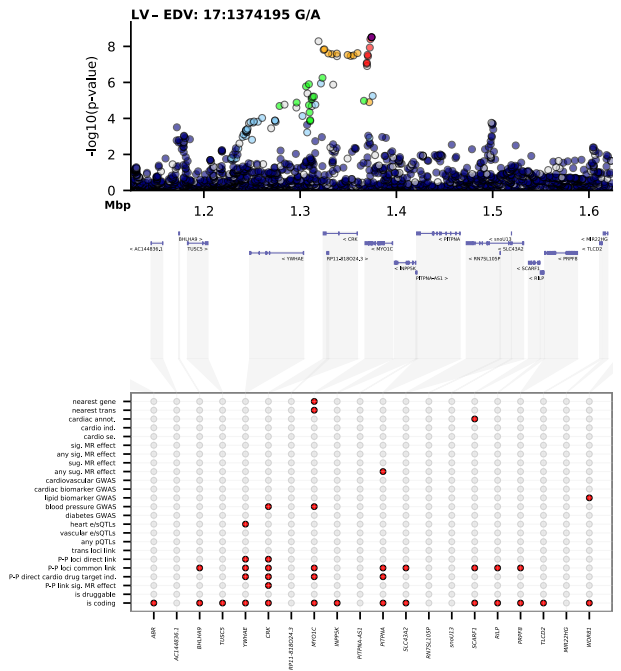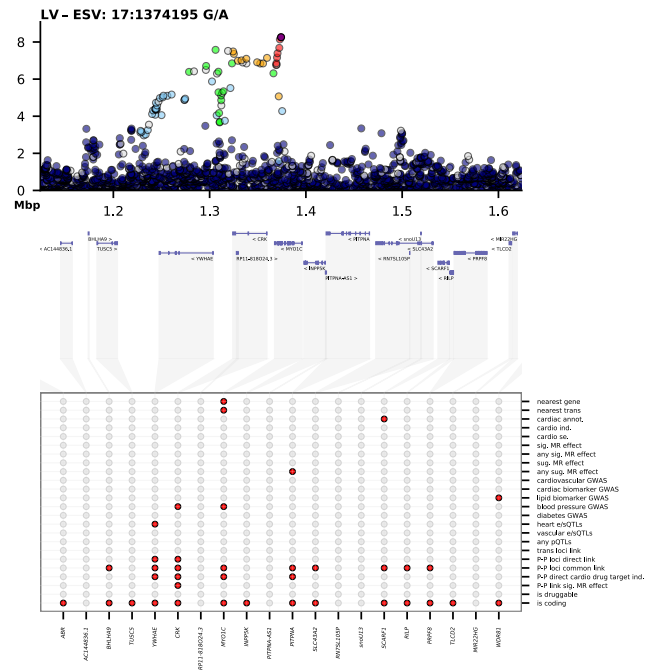

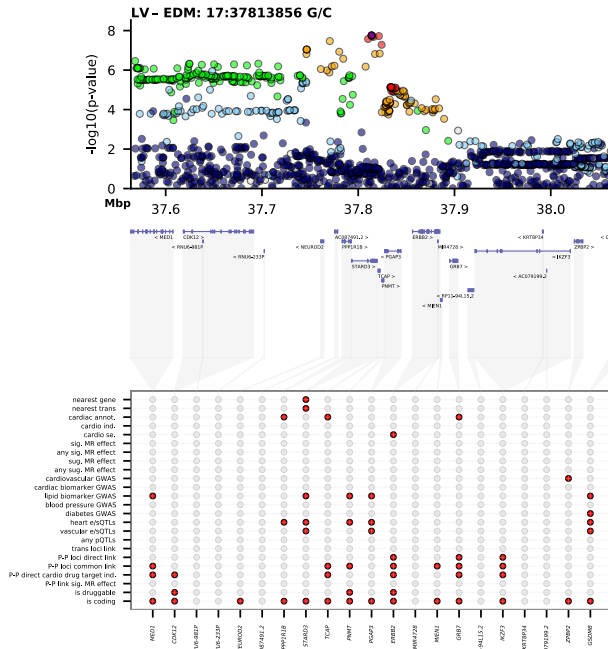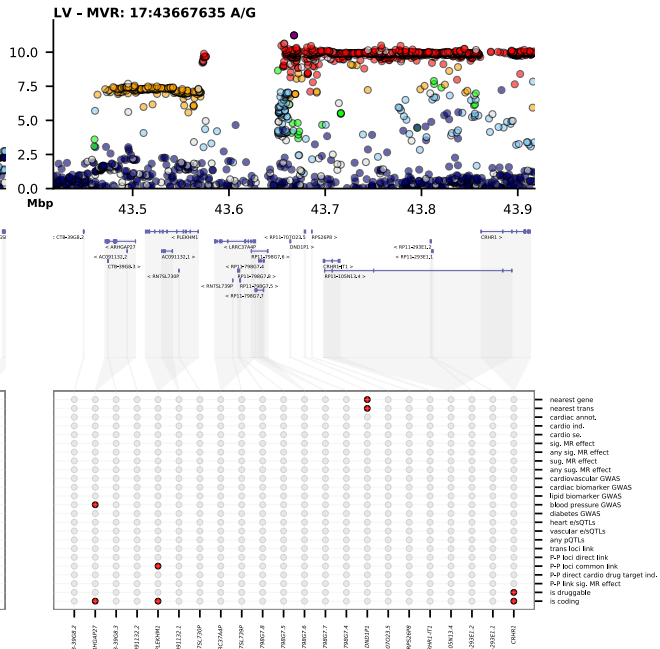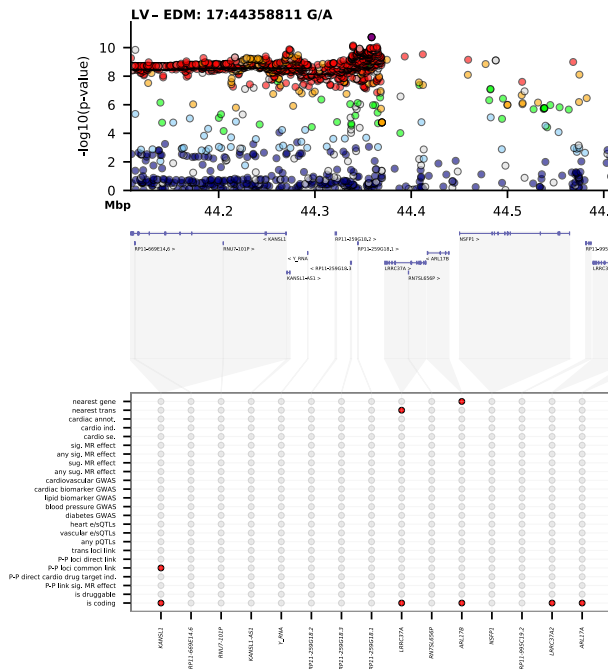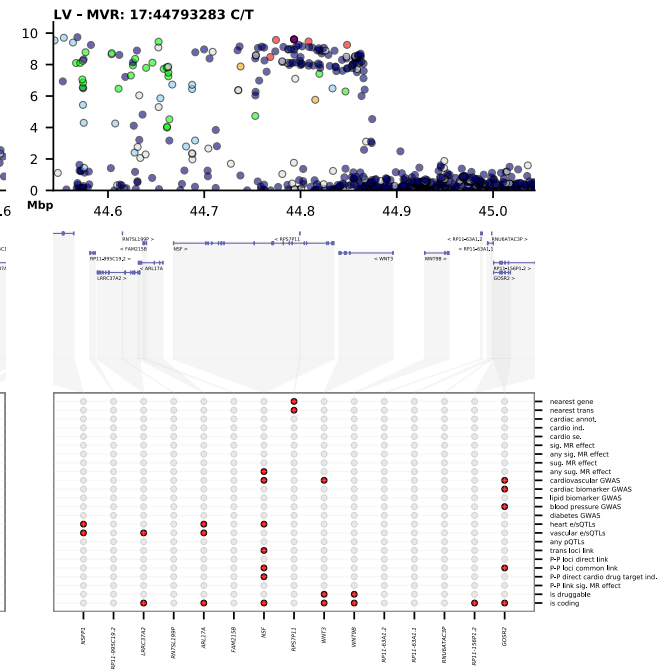

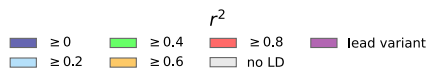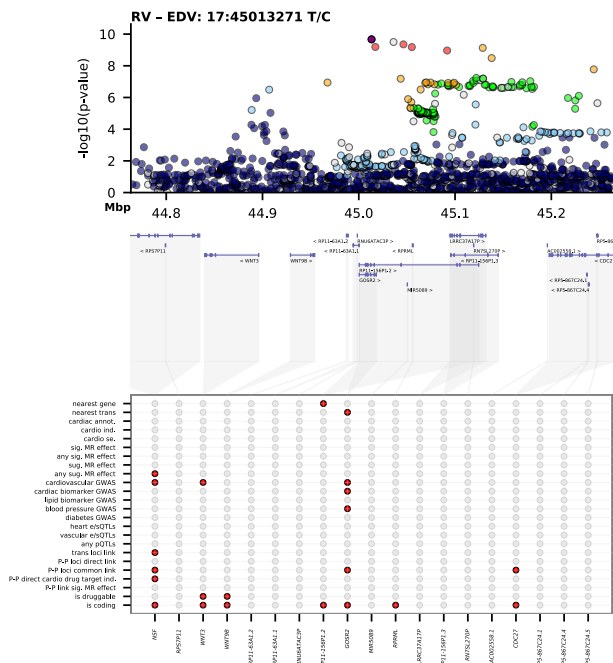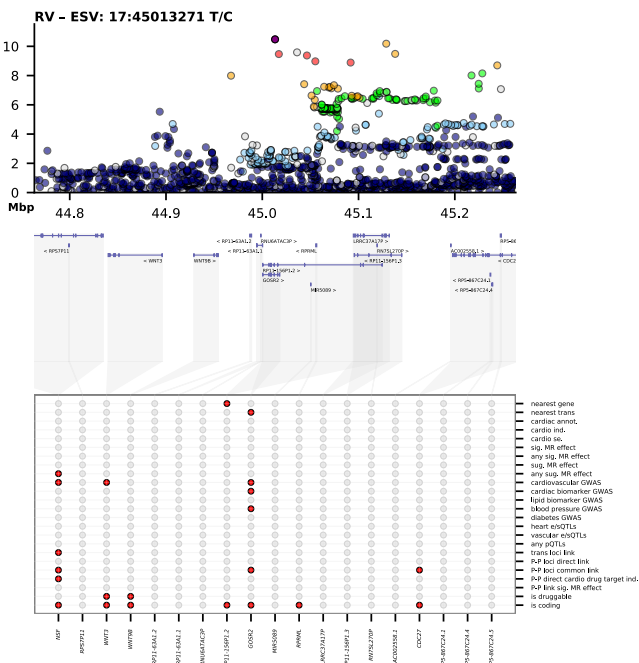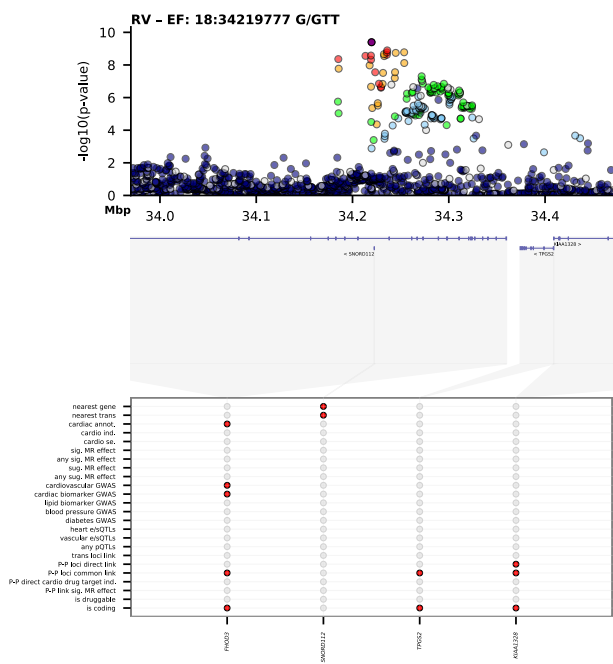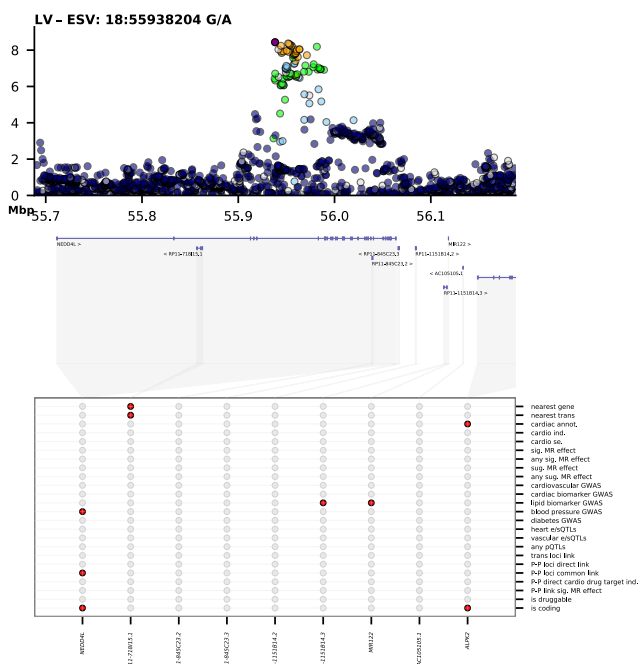

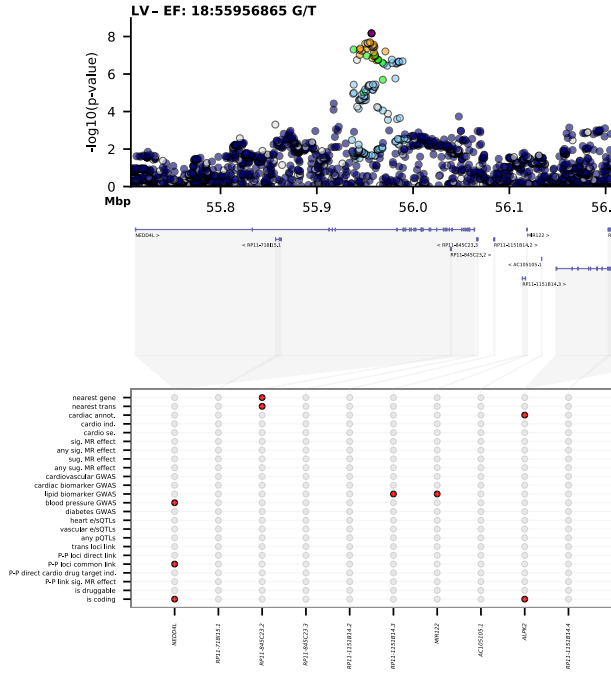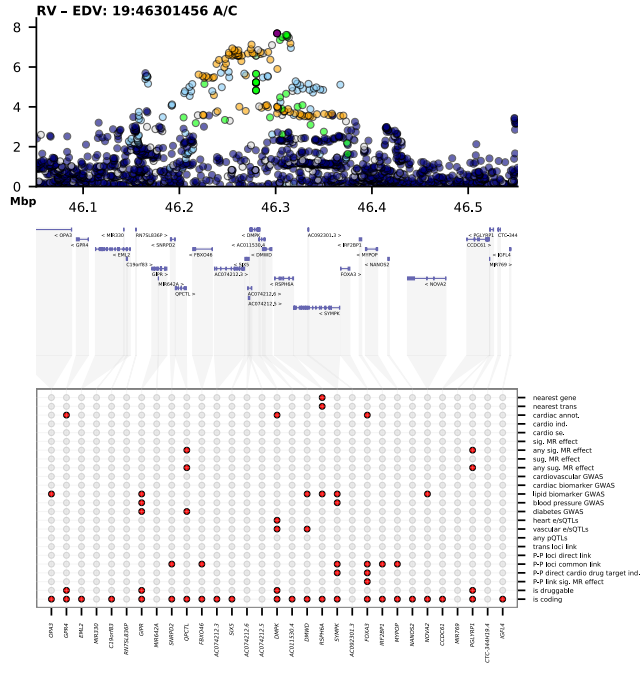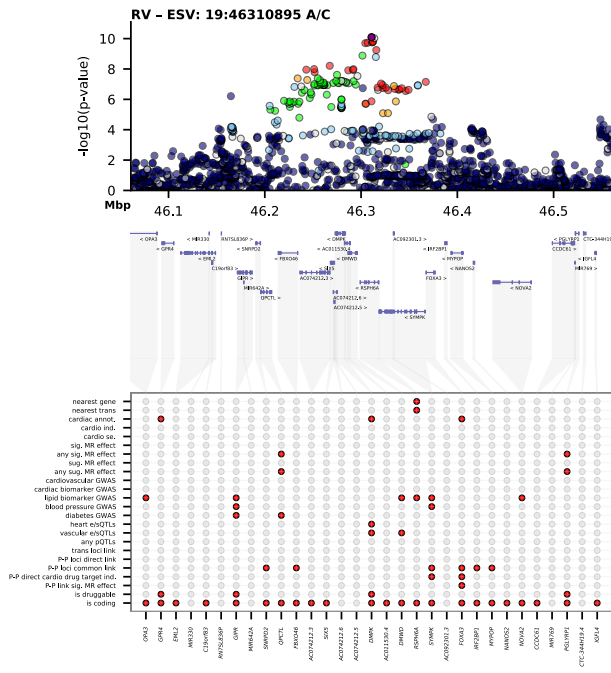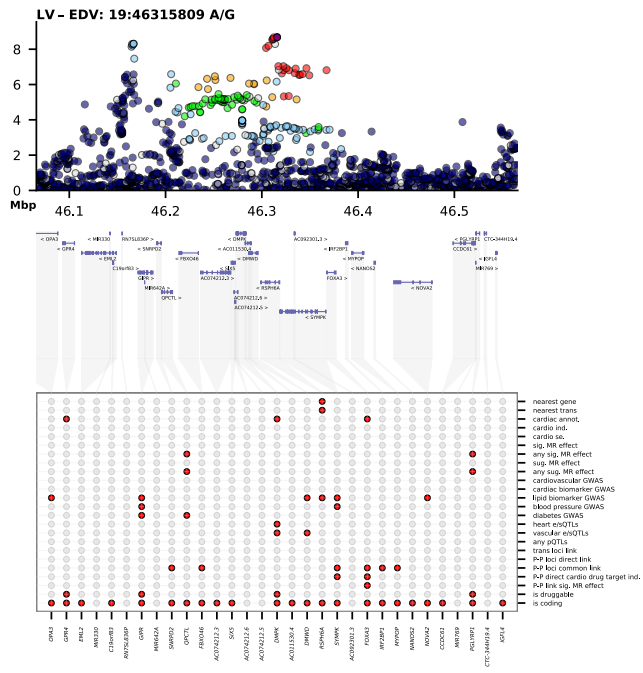







## *Gene assignment table*

The supplementary file 'GeneAssignment.xlsx' contains the original scoring sheet used to rank the most likely putative causal gene for each CMR locus. The rating was based on the annotated locus view plots presented in Supplementary pdf, including 23 criteria potentially informative for the causal gene assignment. A rank of 1 should be interpreted as the first choice, with any number of subsequent choices possible. The gene with the highest average rank (i.e., the smallest number), was presented as the putative causal gene.

## *Supplementary note*

Keywords of cardiometabolic drug indications and side-effects.

### *Cardiometabolic indication*

- Acute Coronary Syndrome
- Acute exacerbation of bronchiectasis
- Acute exacerbation of chronic obstructive pulmonary disease
- Amyloidosis
- Amyloidosis, Familial
- Anemia
- Anemia, Aplastic
- Anemia, Hemolytic, Autoimmune
- Anemia, Refractory
- Anemia, Refractory, with Excess of Blasts
- Anemia, Sickle Cell
- Aneurysm
- Angioedemas, Hereditary
- Aortic Aneurysm, Abdominal
- Aortic Diseases
- Aortic Valve Stenosis
- Asthma
- Atrial Fibrillation
- Atrial Flutter
- Bronchitis, Chronic
- Cardiomyopathies
- Cardiovascular Diseases
- Coronary Artery Disease
- Coronary Disease
- Emphysema
- Essential Hypertension
- Fibrosis
- Heart Diseases
- Heart Failure
- Heart failure (for patients in sinus rhythm)
- Hypertension
- Hypertension, Pulmonary
- Hypotension, Orthostatic
- Idiopathic Pulmonary Fibrosis
- Ischemia
- Lung Diseases, Interstitial
- Lung Diseases, Obstructive
- Maintenance, for atrial fibrillation or flutter
- Mild to moderate essential hypertension
- Myocardial Infarction
- Myocarditis
- Myositis
- Myositis, Inclusion Body
- Non-ST Elevated Myocardial Infarction
- Pericarditis
- Peripheral Arterial Disease
- Pneumonia

- Pneumonia, Viral
- Pre-Eclampsia
- Prophylaxis of acute rejection in cardiac transplantation (in combination with ciclosporin and corticosteroids) (under expert supervision)
- Prophylaxis of atherothrombotic events following an acute coronary syndrome with elevated cardiac biomarkers (in combination with aspirin alone or aspirin and clopidogrel)
- Prophylaxis of atherothrombotic events in patients with coronary artery disease or symptomatic peripheral artery disease at high risk of ischaemic events (in combination with aspirin)
- Prophylaxis of stroke and systemic embolism in non-valvular atrial fibrillation and at least one risk factor (such as previous stroke or transient ischaemic attack, symptomatic heart failure, diabetes mellitus, hypertension, or age 75 years and over)
- Prophylaxis of stroke and systemic embolism in patients with non-valvular atrial fibrillation and with at least one of the following risk factors: congestive heart failure, hypertension, previous stroke or transient ischaemic attack, age  $\geq$  75 years, or diabetes mellitus
- Pulmonary Disease, Chronic Obstructive
- Pulmonary Embolism
- Pulmonary Fibrosis
- Pulmonary Veno-Occlusive Disease
- Respiratory Distress Syndrome, Adult
- Rheumatic Heart Disease
- Sarcoidosis
- Stroke
- Tachycardia, Supraventricular
- Thrombocythemia, Essential
- Thrombocytopenia
- Thromboembolism
- Thrombosis
- Vascular Diseases
- Venous Thromboembolism
- Venous Thrombosis
- Severe acute asthma in patients not previously treated with theophylline
- Coronary Restenosis
- Secondary prevention of ischaemic stroke and transient ischaemic attacks
- Severe acute asthma
- Treatment of deep-vein thrombosis
- Adjunct to oral anticoagulation for prophylaxis of thromboembolism associated with prosthetic heart valves
- Severe acute exacerbation of chronic obstructive pulmonary disease in patients not previously treated with theophylline
- Atherosclerosis
- Heart Arrest
- Angina, Unstable
- Secondary prevention of ischaemic stroke (not asso-

ciated with atrial fibrillation) and transient ischaemic attacks (used alone or with aspirin)

- Cerebral Arterial Diseases
- Chronic asthma
- Embolism
- Arrhythmias, Cardiac
- Adjunct to bronchodilators for the maintenance treatment of patients with severe chronic obstructive pulmonary disease associated with chronic bronchitis and a history of frequent exacerbations
- Hypercholesterolemia
- Diabetes Mellitus
- Ischemic Attack, Transient
- Type 2 diabetes mellitus

[monotherapy or in combination with other antidiabetic drugs (including insulin)]

- Severe acute exacerbation of chronic obstructive pulmonary disease
- Diabetes Mellitus, Type 1
- Hereditary angioedema
- Type 2 diabetes mellitus [reduction in risk or delay of onset]
- Angina, Stable
- Myocardial Ischemia
- Carcinoid Heart Disease
- Carotid Stenosis
- Diabetes Mellitus, Type 2
- ST Elevation Myocardial Infarction
- Hypotension

### *Cardiometabolic side-effects*

- Acute coronary syndrome
- anaemia
- Anaemia
- aneurysm
- Aneurysm
- angina pectoris
- Angina pectoris
- arrhythmia
- arrhythmias
- Arrhythmias
- Arterial thromboembolism
- artery dissection
- ascites
- asthma
- atrioventricular block
- bradycardia
- cardiac arrest
- Cardiac arrest
- cardiac conduction disorder
- cardiac disorder

- Cardiac disorder
- cardiac inflammation
- cardiomegaly
- cardiomyopathy
- cardiovascular disorders
- cerebral ischaemia
- cerebrovascular insufficiency
- chest discomfort
- chest pain
- Chest pain
- chest tightness
- circulatory collapse
- coagulation disorders
- coma
- congestive heart failure
- Coronary artery insufficiency
- cyanosis
- diabetes mellitus

- dyslipidaemia
- Dyslipidaemia
- dyspnoea
- Dyspnoea
- embolism and thrombosis
- Embolism and thrombosis
- Endocarditis
- haemorrhage
- Haemorrhage
- hypercalcaemia
- hypercholesterolaemia
- hyperglycaemia
- Hyperglycaemia
- hypertension
- hyperthyroidism
- hypocalcaemia
- hypoglycaemia
- hypokalaemia
- hypomagnesaemia
- hyponatraemia
- hypophosphataemia
- hypotension
- hypoxia
- interstitial lung disease
- ischaemia
- ischaemic heart disease
- multi organ failure
- myocardial dysfunction
- myocardial infarction
- Myocardial infarction
- myocardial ischaemia
- myocarditis
- Myocarditis
- myopathy
- myositis
- oedema
- palpitations
- pericardial disorders
- pericardial effusion
- pericarditis
- Pulmonary arterial hypertension
- pulmonary embolism
- pulmonary hypertension
- pulmonary oedema
- QT interval prolongation
- respiratory disorders
- Respiratory disorders
- sarcoidosis
- stroke
- supraventricular tachycardia
- syncope
- tachycardia
- thyroid disorder
- type 1 diabetes mellitus
- ventricular dysfunction
- Asthma
- Prophylaxis of stroke and systemic embolism in patients with non-valvular atrial fibrillation and with at least one of the following risk factors: congestive heart failure, hypertension, previous stroke or transient ischaemic attack, age  $\geq$  75 years, or diabetes mellitus
- Cerebral Amyloid Angiopathy
- Acute Coronary Syndrome
- Severe acute asthma in patients not previously treated with theophylline
- Coronary Restenosis
- Non-ST Elevated Myocardial Infarction
- Secondary prevention of ischaemic stroke and transient ischaemic attacks
- Pericarditis
- Stroke
- Severe acute asthma
- Treatment of deep-vein thrombosis
- Adjunct to oral anticoagulation for prophylaxis of thromboembolism associ-

ated with prosthetic heart valves

- Severe acute exacerbation of chronic obstructive pulmonary disease in patients not previously treated with theophylline
- Atherosclerosis
- Prophylaxis of atherothrombotic events in patients with coronary artery disease or symptomatic peripheral artery disease at high risk of ischaemic events (in combination with aspirin)
- Anemia
- Peripheral Arterial Disease
- Aortic Valve Stenosis
- Amyloidosis
- Thromboembolism
- Venous Thromboembolism
- Atrial Fibrillation
- Heart Arrest
- Thrombosis
- Angina, Unstable
- Secondary prevention of ischaemic stroke (not associated with atrial fibrillation) and transient ischaemic attacks (used alone or with aspirin)
- Heart Diseases
- Pneumonia
- Coronary Disease
- Prophylaxis of stroke and systemic embolism in non-valvular atrial fibrillation and at least one risk factor (such as previous stroke or transient ischaemic attack, symptomatic heart failure, diabetes mellitus, hypertension, or age 75 years and over)
- Cerebral Arterial Diseases
- Chronic asthma
- Prophylaxis of recurrent pulmonary embolism
- Pulmonary Embolism
- Embolism
- Hypertension, Pulmonary
- Atrial Flutter
- Arrhythmias, Cardiac
- Rheumatic Heart Disease
- Venous Thrombosis
- Treatment of pulmonary embolism
- Prophylaxis of atherothrombotic events following an acute coronary syndrome with elevated cardiac biomarkers (in combination with aspirin alone or aspirin and clopidogrel)
- Myocardial Infarction
- Heart Failure
- Hypercholesterolemia
- Bronchitis, Chronic
- Diabetes Mellitus
- Sarcoidosis
- Cardiovascular Diseases
- Ischemic Attack, Transient
- Type 2 diabetes mellitus [monotherapy or in combination with other antidiabetic drugs (including insulin)]
- Severe acute exacerbation of chronic obstructive pulmonary disease
- Diabetes Mellitus, Type 1
- Type 2 diabetes mellitus [reduction in risk or delay of onset]
- Coronary Artery Disease
- Angina, Stable
- Myocardial Ischemia
- Hypertension



- Carcinoid Heart Disease
- Carotid Stenosis
- Diabetes Mellitus, Type 2
- ST Elevation Myocardial

- Infarction
- Hypotension
  - Intracranial Aneurysm

**Other supplementary materials for this manuscript:**

**Supplementary File 3 (.xlsx):** Scoring sheet identifying the putative causal genes.
